# Supplementary material for: Persistence, period and precision of autonomous cellular oscillators from the zebrafish segmentation clock
Source: PubMed Central journal article supplement (PMC4803185; doi:10.7554/elife.08438), 2016-02-13

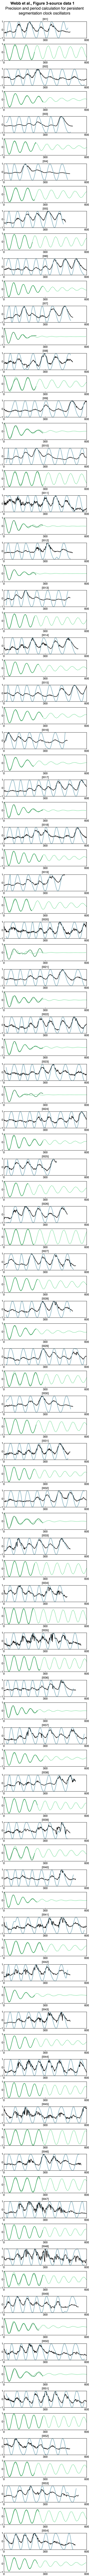

Supplement: elife-08438-fig3-data1.pdf [file elife-08438-fig3-data1.pdf]
