# Supplementary material for: Persistence, period and precision of autonomous cellular oscillators from the zebrafish segmentation clock
Source: eLife. 2016 Feb 13;5:e08438. doi: 10.7554/eLife.08438 (PMC4803185; doi:10.7554/eLife.08438)
Supplement: Figure 1—source data 3. — XLS file containing all time series data for each of the 147 low-density segmentation clock cells in the presence of Fgfb. The file contains 4 work-sheets corresponding to each of the 4 independent replicates and to the plots in Figure 1—figure supplement 5. In each sheet, each cell is described by 3 neighboring columns: average fluorescence, local background, and background subtracted signal. Cells are also listed by their field of view in the original microscopy files. DOI: http://dx.doi.org/10.7554/eLife.08438.006 [file elife-08438-fig1-data3.xlsx]

## Sheet: 280711
field11_cell1avg	field11_cell1bkg	field11_cell1sub	field11_cell2avg	field11_cell2bkg	field11_cell2sub	field11_cell3avg	field11_cell3bkg	field11_cell3bkg	field12_cell1avg	field12_cell1bkg	field12_cell1sub	field12_cell2avg	field12_cell2bkg	field12_cell2sub	field12_cell3avg	field12_cell3bkg	field12_cell3sub	field12_cell4avg	field12_cell4bkg	field12_cell4sub	field12_cell5avg	field12_cell5bkg	field12_cell5sub	field12_cell6avg	field12_cell6bkg	field12_cell6sub	field12_cell7avg	field12_cell7bkg	field12_cell7sub	field13_cell1avg	field13_cell1bkg	field13_cell1sub	field13_cell2avg	field13_cell2bkg	field13_cell2sub	field13_cell3avg	field13_cell3bkg	field13_cell3sub	field14_cell1avg	field14_cell1bkg	field14_cell1sub	field14_cell2avg	field14_cell2bkg	field14_cell2sub	field14_cell3avg	field14_cell3bkg	field14_cell3sub	field14_cell4avg	field14_cell4bkg
2816.44	2795.58	20.866	2759.59	2733.75	25.848	3577.65	3375.95	201.695	2726.49	2736.56	-10.064	2770.87	2777.27	-6.406	3824.54	3337.1	487.441	3699.9	3406.19	293.711	3905.94	3476.63	429.308	3207.51	3021.06	186.45	2861.98	2854.82	7.154	3069.93	3001.88	68.043	3435.11	3207.14	227.962	3161.91	2922.08	239.834	3550.45	3160.37	390.076	2804.34	2656.7	147.639	2891.63	2696.18	195.442	3291.74	3125.75
2831.44	2717.49	113.954	2645.76	2642.66	3.099	3464.83	3300.62	164.213	2649.18	2691.51	-42.334	2682.62	2710.98	-28.36	3621.65	3272.63	349.019	3516.68	3324.09	192.592	3765	3415.9	349.1	3122.55	2946.36	176.183	2765.37	2784.34	-18.973	3009.99	2960.58	49.413	3330.29	3153.06	177.228	3018.56	2900.21	118.355	3515.62	3163.33	352.293	2752.5	2641.39	111.105	2824.67	2668.76	155.91	3208.79	3096.36
2781.93	2678.89	103.039	2624.05	2602.8	21.251	3426.27	3267.2	159.065	2574.57	2607.46	-32.886	2624.68	2617.21	7.471	3574.27	3170.89	403.384	3488.61	3220.2	268.411	3683.08	3308.95	374.126	2997.51	2855.41	142.101	2681.76	2707.37	-25.615	2912.86	2885.13	27.728	3245.9	3068.94	176.962	2942.3	2839.76	102.533	3254.14	3149.88	104.264	2741.37	2617	124.373	2806.23	2656.7	149.53	3219.86	3088.17
2723.27	2655.22	68.047	2593.3	2575.13	18.172	3385.71	3240.97	144.743	2542.89	2581.85	-38.96	2550.54	2583.06	-32.514	3304.81	3123.32	181.496	3388.03	3179.7	208.328	3591.87	3263.52	328.356	2944.45	2812.16	132.289	2633.88	2665.32	-31.432	2857.16	2853.42	3.741	3174.68	3027.11	147.573	2912.18	2806.94	105.235	3360.33	3139.75	220.574	2706.37	2598.05	108.312	2813.62	2635.29	178.332	3198.65	3076.9
2731.81	2657.58	74.229	2573.88	2572.75	1.131	3357.6	3243.04	114.561	2485.79	2543.54	-57.746	2504.12	2537.68	-33.557	3308.85	3095.85	213.003	3293.09	3134.82	158.27	3481.01	3216.46	264.549	2860.52	2773.19	87.329	2591.98	2631.93	-39.948	2821.02	2813.66	7.357	3119.1	2994.33	124.771	2824.34	2764.92	59.426	3384.88	3133.2	251.676	2692.2	2585.3	106.902	2769.61	2652.01	117.591	3174.35	3066.41
2691.52	2637.4	54.116	2552.11	2544.73	7.377	3323.61	3212.32	111.294	2472.46	2521.99	-49.536	2472.56	2517.33	-44.769	3281.15	3066.93	214.227	3224.78	3108.2	116.589	3412.94	3178	234.946	2836.28	2749.45	86.835	2573.53	2610.74	-37.203	2785.81	2796.53	-10.724	3065.4	2960.83	104.569	2834.62	2742.1	92.517	3355.8	3118.23	237.563	2642.19	2577.32	64.873	2757.81	2635.52	122.295	3140.51	3052.81
2709.33	2618.96	90.375	2492.62	2531.07	-38.453	3261.51	3193.88	67.624	2456.55	2490.28	-33.732	2439.38	2505.9	-66.524	3227.71	3026.59	201.122	3171.29	3073.74	97.55	3386.18	3163.01	223.172	2809.86	2715.11	94.746	2571.49	2586.28	-14.785	2748.5	2758.56	-10.06	3051.14	2933.94	117.202	2770.85	2703.07	67.777	3289.28	3119.5	169.781	2637.97	2570.94	67.03	2725.24	2634.55	90.694	3118.95	3039.29
2742.65	2621.74	120.914	2492.48	2538.21	-45.731	3275.31	3195.61	79.698	2451.59	2472.57	-20.971	2418.45	2488.97	-70.518	3227.61	3012.5	215.106	3142.19	3070.93	71.251	3416.72	3145.34	271.385	2798.69	2709.75	88.942	2526.84	2571.31	-44.47	2734.66	2756.47	-21.816	3027.3	2922.77	104.537	2733.23	2703.52	29.711	3284.67	3124.91	159.765	2611.59	2566.46	45.134	2739.08	2642.77	96.312	3135.28	3044.62
2712.1	2621.56	90.536	2489.85	2533.22	-43.365	3304.23	3196.45	107.773	2428.01	2458.88	-30.875	2403.67	2471.26	-67.585	3096.57	2996.43	100.141	3155.12	3037.77	117.353	3413.41	3132.2	281.207	2784.18	2695.05	89.129	2528.91	2561.58	-32.672	2722.05	2742.24	-20.187	3011.12	2915.5	95.623	2766.21	2702.09	64.122	3279.18	3128.27	150.91	2624.81	2576.18	48.633	2691.75	2658.23	33.52	3135.92	3048.4
2678.33	2615.65	62.676	2474.76	2528.62	-53.861	3263.52	3190.74	72.786	2430	2461.31	-31.308	2393.63	2474.54	-80.912	3134.35	2980.01	154.337	3104.51	3025.32	79.187	3401.42	3113.21	288.21	2766.04	2675.68	90.359	2530.08	2568.14	-38.06	2703.82	2727.44	-23.622	2980.94	2905.7	75.241	2705.8	2680.39	25.412	3248.82	3122.77	126.045	2592.75	2562.84	29.903	2574.46	2643.4	-68.945	3130.4	3035.26
2682.89	2617.37	65.522	2497.84	2523.5	-25.663	3284.44	3185.3	99.139	2416.79	2452.34	-35.55	2384.6	2460.06	-75.465	3086.64	2985.87	100.764	3105.86	3025.94	79.914	3369.58	3111.9	257.682	2761.33	2679.37	81.966	2524.91	2562.25	-37.341	2708.67	2724.68	-16.008	2965.11	2894.49	70.621	2705.89	2680.06	25.832	3243.97	3116.33	127.643	2587.32	2554.35	32.969	2597.67	2642.12	-44.452	3097.07	3021.1
2656.13	2580.86	75.266	2489.61	2520.5	-30.886	3264.44	3179.49	84.95	2386.15	2438.5	-52.354	2387.75	2449.34	-61.595	3051.51	2966.57	84.945	3048.82	3003.41	45.411	3349.77	3098.29	251.48	2747.88	2656.95	90.929	2469.65	2547.31	-77.659	2688.11	2710.41	-22.301	2955.33	2881.85	73.48	2657.35	2672.4	-15.047	3231.4	3125.37	106.029	2599.31	2553.75	45.559	2578.47	2636.12	-57.652	3096.68	3027.4
2647.45	2567.97	79.482	2470.43	2519.28	-48.856	3265.78	3191.32	74.458	2392.46	2427.26	-34.802	2372.96	2442.69	-69.731	3002.04	2959.2	42.84	3065.16	2997.5	67.653	3314.8	3083.05	231.75	2750.27	2657.37	92.901	2492.65	2543.27	-50.621	2700.95	2703.64	-2.689	2961.73	2881.95	79.777	2639.59	2662.37	-22.778	3219.55	3104.94	114.612	2581.62	2538.05	43.566	2588.44	2642.47	-54.029	3084.17	3007.1
2632.16	2571.71	60.446	2462.17	2507.69	-45.517	3250	3179.25	70.754	2363.95	2424.37	-60.416	2354.55	2433.57	-79.014	3007.42	2941.92	65.496	3020.08	2988.03	32.059	3336.39	3078.06	258.33	2751.3	2646.57	104.732	2484.05	2532.05	-48.002	2688.85	2698.48	-9.624	2947.33	2872.12	75.206	2633.16	2655.42	-22.258	3186.85	3103.84	83.01	2564.39	2542.91	21.478	2594.06	2628.09	-34.033	3069.91	3011.26
2628.14	2570.24	57.895	2451.47	2515.25	-63.782	3252.65	3180.46	72.186	2423.07	2417.53	5.55	2360.92	2424.75	-63.835	3004.39	2943.88	60.513	3013.01	2985.28	27.736	3344.13	3071.42	272.712	2753.95	2643.08	110.866	2457	2526.63	-69.632	2686.68	2694.76	-8.076	2922.46	2860.22	62.237	2622.94	2657.99	-35.048	3184.48	3095.98	88.506	2565.62	2535.86	29.758	2642.98	2619.84	23.137	3064.28	3009.48
2602.55	2558.85	43.705	2494.89	2512.35	-17.467	3271.56	3172.2	99.36	2427.28	2417.36	9.923	2353.63	2427.68	-74.057	2998.6	2943.57	55.03	3041.87	2976.85	65.024	3312.34	3069.78	242.55	2760.93	2636.14	124.786	2475.2	2524.2	-49.008	2683.09	2707.85	-24.768	2926.62	2869.33	57.293	2646.56	2659.85	-13.298	3180.57	3098.41	82.159	2569.62	2539.59	30.031	2670.45	2618.51	51.943	3060.62	2999.7
2620.69	2554.63	66.06	2464.49	2508.28	-43.784	3238.29	3170.04	68.253	2408.75	2423.61	-14.86	2349.9	2428.43	-78.534	2964.25	2938.59	25.66	3034.37	2981.76	52.606	3203.52	3070.11	133.404	2770.73	2635.93	134.806	2450.36	2516.29	-65.934	2662.64	2694.57	-31.931	2919.73	2867.8	51.93	2620.85	2647.03	-26.178	3160.15	3092.08	68.07	2568.68	2531.64	37.042	2661.88	2603.16	58.722	3044.5	2997.07
2628.89	2568.19	60.697	2441.36	2500.68	-59.31	3230.58	3170.12	60.459	2407.27	2424.96	-17.692	2350.14	2419.34	-69.197	2948.28	2931.41	16.872	3021.36	2979.14	42.224	3261.36	3072.76	188.595	2789.62	2634.31	155.31	2449.74	2520.19	-70.454	2668.21	2689.17	-20.954	2922.41	2868.94	53.472	2620.22	2652.64	-32.413	3154.81	3078.67	76.143	2535.03	2526.85	8.178	2641.77	2609.85	31.912	3030.42	2995.36
2618.22	2568.37	49.855	2447.82	2496.47	-48.657	3213.68	3158.92	54.759	2422.82	2414.06	8.752	2346.36	2428.79	-82.432	2914.49	2931.12	-16.635	3003.91	2973.56	30.353	3228.22	3058.68	169.542	2774.87	2629.9	144.966	2461.15	2507.35	-46.206	2655.59	2688.5	-32.904	2909.3	2855.63	53.671	2612.42	2631.7	-19.288	3137.24	3076.42	60.827	2537.64	2512.49	25.142	2615.88	2609.56	6.325	3025.28	2992.02
2601.05	2569.6	31.449	2438.38	2510.06	-71.681	3220.9	3174.06	46.837	2403.89	2419.9	-16.012	2365.28	2426.2	-60.921	2916.63	2930.49	-13.861	2999.18	2962.5	36.681	3250.06	3063.86	186.2	2793.88	2642.37	151.514	2450.16	2520.48	-70.313	2651.45	2687.11	-35.666	2916.84	2857.76	59.076	2597.41	2640.25	-42.839	3153.06	3089.5	63.558	2549.85	2526.87	22.985	2609.87	2618.1	-8.233	3019.56	3001.43
2600.18	2586.66	13.529	2514.89	2520.76	-5.87	3251.46	3180.37	71.093	2421.93	2422.03	-0.102	2358.76	2424.37	-65.614	2924.84	2929.33	-4.494	3019.1	2975.39	43.708	3358.8	3067.24	291.561	2803.24	2641.36	161.876	2458.4	2525.01	-66.608	2641	2670.61	-29.611	2913.88	2830.73	83.146	2619.92	2627.67	-7.749	3165.73	3081.72	84.009	2529.75	2531.92	-2.169	2622.29	2625.48	-3.196	3054.3	3001.72
2572.88	2562.11	10.765	2468.05	2499.39	-31.348	3231.84	3160.87	70.972	2397.6	2404.17	-6.567	2346.02	2413.65	-67.635	2977.92	2925.92	51.997	3008.59	2970.32	38.276	3261.27	3051.05	210.224	2807.33	2628.57	178.756	2426.87	2508.99	-82.124	2619.19	2656.74	-37.555	2902.05	2825.13	76.921	2582.79	2620.93	-38.14	3161.46	3082.28	79.187	2569.29	2531.69	37.6	2643.92	2624.92	19.007	3030.75	2996.78
2566.32	2561.73	4.592	2433.75	2497.97	-64.222	3241.56	3153.08	88.483	2380.59	2394.67	-14.079	2349.99	2402.82	-52.828	2942.69	2915.22	27.476	3021.41	2969.47	51.941	3228.88	3059.89	168.991	2809.62	2628.54	181.078	2451.03	2510.57	-59.539	2618.92	2647.77	-28.846	2903.64	2820.83	82.81	2584.1	2611.48	-27.386	3157.01	3077.26	79.745	2543.2	2518.01	25.195	2641.27	2618.49	22.78	3037.78	2989.16
2567	2540.39	26.608	2438.53	2482.71	-44.175	3223.65	3134.4	89.257	2323.9	2390.11	-66.207	2317.9	2391.97	-74.068	2895.74	2907.02	-11.279	3006.48	2956.9	49.579	3311.06	3036.78	274.287	2800.09	2612.47	187.618	2432.91	2491.11	-58.199	2589.11	2618.31	-29.198	2869.12	2799	70.12	2556.33	2588.26	-31.938	3138.58	3064.87	73.706	2547.13	2511.04	36.089	2633.88	2601.69	32.188	3034.68	2976.11
2545.81	2535.83	9.979	2469.58	2478.48	-8.906	3198.21	3123.34	74.875	2334.24	2368.5	-34.267	2302.06	2380.93	-78.863	2941.21	2895.29	45.917	2985.32	2937.33	47.987	3254.23	3028.33	225.894	2772.64	2598.67	173.972	2425.39	2478.29	-52.893	2600.25	2605.31	-5.058	2858.78	2783.81	74.964	2548.38	2583.13	-34.755	3133.49	3047.05	86.445	2543.04	2502.92	40.12	2613.48	2609.16	4.327	3034.97	2973.47
2544.94	2529.47	15.472	2460.08	2472.3	-12.218	3234.93	3120.87	114.057	2339.05	2365.57	-26.528	2313.17	2382.5	-69.334	2897.78	2880.92	16.852	3001.82	2927.95	73.877	3228.57	3018.38	210.184	2773.29	2590.39	182.901	2426.3	2474.79	-48.487	2570.02	2603.85	-33.834	2847.73	2780.41	67.32	2552.25	2581.07	-28.813	3099.17	3037.28	61.896	2525.86	2492.41	33.447	2554.03	2594.71	-40.678	3012.13	2954.79
2544.22	2527.5	16.719	2470.14	2470.02	0.123	3237.25	3105.56	131.687	2388.25	2366.79	21.454	2310.91	2373.9	-62.994	2915.82	2877.64	38.183	3002.93	2930.47	72.468	3258.51	3021.26	237.247	2758.48	2594.88	163.598	2436.77	2474.7	-37.929	2569.36	2599.57	-30.21	2839.2	2774.96	64.24	2578.68	2575.36	3.321	3093.68	3016.93	76.759	2506.52	2483.28	23.241	2531.77	2589.34	-57.564	3020.06	2934.45
2550.17	2512	38.17	2430.76	2457.87	-27.112	3242.25	3099.54	142.708	2380.47	2353.7	26.767	2297.98	2366.08	-68.102	2904.57	2865.15	39.415	2978.22	2908.11	70.116	3237.84	3003.93	233.911	2736.98	2580.7	156.272	2406.16	2455	-48.837	2555.7	2593.21	-37.508	2837.84	2768.23	69.619	2543.4	2566.57	-23.166	3102.29	3007.47	94.819	2463.88	2471.04	-7.164	2522.32	2581.38	-59.058	2996.49	2917.22
2528.41	2497.04	31.371	2449.76	2451.85	-2.086	3218.04	3078.93	139.108	2368.49	2348.66	19.832	2292.79	2357.67	-64.88	2899.29	2860.05	39.249	2979.01	2903.47	75.541	3246.32	2991.41	254.91	2744.29	2567.1	177.186	2405.84	2459.11	-53.268	2558.39	2589.1	-30.706	2840.23	2764.36	75.867	2552.54	2567.58	-15.045	3100.04	3001.49	98.555	2492.13	2458.65	33.479	2549.7	2561.85	-12.156	3006.09	2908.96
2539.73	2495.98	43.75	2432.15	2434.98	-2.832	3203.63	3075.34	128.285	2371.64	2331.83	39.806	2287.29	2344.12	-56.831	2858.06	2844.14	13.922	2949.67	2884.19	65.478	3187.97	2968.23	219.737	2701.85	2557.4	144.445	2417.36	2436.65	-19.288	2540.26	2582.24	-41.98	2816.71	2745.41	71.304	2579.77	2552.59	27.179	3092.51	3001.72	90.788	2490.24	2454.78	35.458	2603.5	2560.66	42.842	2968.16	2903.95
2533.16	2497.99	35.173	2400.38	2438.1	-37.716	3196.18	3070.45	125.724	2314.74	2324.12	-9.374	2277.11	2338.87	-61.767	2850.54	2829.72	20.827	2936.14	2867.46	68.689	3201.38	2949.28	252.096	2682.51	2533.64	148.864	2398.81	2421.89	-23.082	2527.4	2569.48	-42.079	2800.49	2736.84	63.65	2565.28	2542.03	23.25	3088.16	2985.23	102.938	2473.33	2442.21	31.12	2589.35	2548.29	41.063	2968.51	2896.63
2553.55	2505.12	48.425	2394.33	2432.13	-37.797	3208.91	3077.42	131.488	2308.41	2323.94	-15.526	2274.34	2322.67	-48.335	2894.44	2808.55	85.885	2915.44	2852.11	63.328	3094.62	2937.65	156.964	2642.63	2535.2	107.427	2407.43	2413.62	-6.196	2542.92	2553.29	-10.369	2789.32	2721.3	68.027	2563.7	2526.43	37.271	3092.53	2989.87	102.662	2461.6	2448.04	13.555	2599.36	2548.8	50.557	2991.74	2890.57
2548.15	2504.67	43.482	2428.21	2440.5	-12.284	3203.45	3083.16	120.293	2318.51	2321.87	-3.354	2277.2	2330.64	-53.441	2903.06	2795.43	107.629	2921.83	2850.91	70.917	3152.39	2934.78	217.613	2643.22	2530.43	112.783	2402.57	2407.33	-4.754	2525.38	2551.58	-26.199	2767.24	2720.26	46.972	2553.05	2516.99	36.061	3092.32	2997.6	94.729	2462.32	2456.46	5.853	2584.23	2554.64	29.596	2972.41	2898.91
2550.19	2506.65	43.541	2429.55	2443.24	-13.697	3209.72	3083.25	126.469	2283.11	2295.36	-12.254	2268.74	2320.69	-51.948	2903.7	2799.14	104.557	2898.35	2842.66	55.682	3042.91	2927.99	114.921	2635.75	2521.37	114.38	2436.27	2399.1	37.169	2518.77	2537.9	-19.123	2763.33	2707.65	55.675	2544.66	2515.42	29.241	3091.38	3000.97	90.402	2466.02	2453.97	12.057	2609.08	2552.05	57.023	2987.4	2889.19
2545.68	2499.77	45.911	2402.74	2450.3	-47.561	3234.33	3073.09	161.243	2274.4	2289.86	-15.458	2248.3	2310.84	-62.543	2809.59	2793.34	16.252	2914.99	2849.35	65.639	3032.04	2916.96	115.08	2625.73	2508.92	116.811	2397.79	2403.26	-5.475	2496.33	2523.63	-27.299	2751.8	2690.96	60.844	2558.26	2497.24	61.021	3089.59	3004.14	85.452	2444.72	2454.76	-10.046	2583.15	2552.87	30.279	2985.59	2888.08
2514.5	2506.65	7.854	2422.12	2440.32	-18.2	3222.82	3088.84	133.983	2265.81	2301.39	-35.583	2278.54	2309.57	-31.025	2878.4	2803.1	75.294	2920.04	2846.77	73.268	3155.67	2940.29	215.381	2639.3	2519.03	120.266	2421.16	2398.43	22.73	2491.52	2526.06	-34.533	2759.1	2693.78	65.324	2580.95	2504.53	76.414	3101.23	3018.78	82.455	2477.16	2469.2	7.953	2630.59	2559.28	71.319	2995.07	2900.98
2504.33	2496.61	7.723	2419.32	2446.38	-27.061	3185.66	3076.76	108.903	2291.02	2288.45	2.57	2281.06	2310.96	-29.9	2874.68	2805.03	69.642	2967.93	2862.8	105.13	3076.79	2949.73	127.067	2643.45	2528.46	114.988	2447.99	2414.14	33.849	2500.65	2515.94	-15.29	2769.39	2699.67	69.722	2541.5	2499.94	41.562	3086.06	3019.8	66.263	2451.66	2463.28	-11.62	2627.84	2546.59	81.247	2966.7	2883.46
2513.16	2476.01	37.141	2395.07	2430.62	-35.553	3194.59	3063.14	131.45	2267.78	2290.26	-22.481	2258.5	2308.21	-49.706	2840	2801.71	38.289	2939.73	2843.97	95.763	3091.76	2937.09	154.671	2610.08	2522.44	87.636	2386.62	2402.99	-16.372	2467.51	2507.75	-40.232	2752.43	2690.6	61.838	2513.68	2491.77	21.914	3051.83	2991.46	60.377	2447.15	2433.62	13.526	2587.46	2529.58	57.879	2993.93	2862.46
2490.5	2467.39	23.116	2363.79	2420.78	-56.99	3151.69	3045.77	105.921	2248.3	2286.84	-38.539	2264.64	2289.3	-24.657	2855.77	2783.45	72.317	2877.07	2831.35	45.722	3099.38	2912.83	186.558	2579.53	2505.97	73.569	2390.53	2389.74	0.788	2454.24	2498.89	-44.658	2719.39	2684.04	35.346	2495.55	2485.26	10.29	3062.75	2997.97	64.782	2426.11	2432.93	-6.813	2587.9	2526.18	61.721	2958.19	2867.68
2488.67	2454	34.667	2356.24	2414.95	-58.714	3154.66	3046.11	108.545	2225.78	2269.5	-43.719	2224	2283.35	-59.353	2822.13	2770.15	51.981	2848.49	2808.1	40.387	3027.39	2890.81	136.587	2570.87	2488.2	82.673	2362.38	2371.49	-9.112	2438.72	2496.31	-57.586	2708.82	2672.41	36.41	2476.21	2475.15	1.058	3033.52	2982.31	51.213	2394.74	2425.82	-31.089	2558.01	2507.51	50.502	2920.5	2855.39
2458.75	2449.21	9.539	2367.64	2419.35	-51.719	3131.01	3041.45	89.557	2218.77	2275.56	-56.786	2243.2	2284.56	-41.361	2812.31	2767.33	44.977	2844.49	2802.82	41.67	3014.63	2890.42	124.206	2570.8	2487.64	83.159	2383.63	2371.94	11.69	2452.14	2485.64	-33.507	2709.25	2651.14	58.117	2491.5	2468.63	22.867	3036.54	2989.69	46.848	2399.97	2415.27	-15.295	2585.74	2508.7	77.037	2932.7	2844.02
2440.87	2423.92	16.949	2358.18	2398.61	-40.426	3105.3	3018.23	87.069	2185.57	2260.86	-75.286	2225.27	2267.52	-42.252	2786.83	2747.83	39	2852.5	2789.02	63.481	3097.84	2887.32	210.522	2581.47	2482.68	98.793	2371.5	2368.82	2.68	2427.97	2472.6	-44.636	2694.09	2642.52	51.568	2493.42	2455.85	37.575	3008.41	2959.39	49.02	2386.59	2404.32	-17.722	2548.66	2488.83	59.832	2918.91	2823.17
2476.03	2413.49	62.54	2351.09	2390.14	-39.049	3123.26	3014.11	109.142	2199.24	2240.64	-41.398	2201.04	2250.55	-49.504	2734.54	2729.49	5.049	2815.49	2776.55	38.937	3047.91	2861.86	186.05	2558.85	2462.63	96.224	2366.03	2353.43	12.603	2433.55	2459.84	-26.292	2671.8	2636.8	34.993	2444.25	2439.77	4.48	2986.84	2937.04	49.799	2364.46	2381.82	-17.36	2523.29	2465.67	57.627	2878.72	2806.22
2487.02	2384.11	102.917	2311.58	2368.15	-56.567	3015.41	2980.53	34.886	2171.92	2229.83	-57.915	2196.44	2238.6	-42.158	2720.7	2703.25	17.444	2786.98	2745.48	41.5	3026.66	2836.84	189.816	2533.91	2441.4	92.507	2291.5	2338.73	-47.23	2408.68	2443.41	-34.737	2647.37	2607.54	39.822	2458.11	2419.46	38.653	2969.89	2923.45	46.437	2343.54	2365.83	-22.289	2516.33	2453.43	62.896	2868.73	2786.39
2483.71	2398.51	85.199	2335.01	2369.69	-34.675	3044.72	2983.58	61.137	2151.23	2219.61	-68.379	2156.43	2227.89	-71.451	2707.89	2689.01	18.879	2753.39	2723.07	30.324	2997.75	2812.31	185.435	2525.99	2424.36	101.638	2293.18	2310.66	-17.48	2411.46	2437.85	-26.389	2636.92	2591.64	45.277	2393.55	2408.59	-15.036	2960.18	2920.44	39.748	2331.64	2357.61	-25.967	2510.98	2447.14	63.845	2854.22	2781.8
2450.96	2396.53	54.431	2349.25	2385.02	-35.775	3064.46	2996.56	67.904	2143.18	2193.87	-50.693	2149.33	2215.31	-65.975	2715.49	2669.98	45.51	2748.68	2708.28	40.401	2962.97	2789.63	173.345	2537.59	2407.86	129.73	2249.69	2300.75	-51.062	2407.45	2425.51	-18.059	2637.57	2576.33	61.241	2427.16	2397.63	29.527	2959.56	2920.75	38.814	2348.76	2375.24	-26.488	2500.08	2438.85	61.232	2867.57	2791.72
2438.97	2410.85	28.12	2373.29	2389.68	-16.394	3066.05	3009.34	56.709	2138.95	2192.38	-53.431	2159.18	2204.54	-45.358	2701.77	2659.32	42.442	2746	2702.12	43.884	3038.38	2791.27	247.109	2536.24	2398.92	137.317	2229.47	2295.48	-66.009	2396.9	2409.97	-13.073	2624.85	2565.2	59.649	2432.21	2386.29	45.916	2977.05	2928	49.048	2347.08	2374.4	-27.322	2512.09	2435.89	76.195	2872.12	2779.14
2430.48	2405	25.482	2389.56	2385.14	4.413	3092.93	3010.6	82.323	2130.17	2189.78	-59.613	2153.24	2202.77	-49.533	2705.35	2654.77	50.576	2758.62	2705.8	52.815	3100.75	2788.91	311.834	2582.48	2405.4	177.082	2286.68	2296.75	-10.066	2386.38	2401.29	-14.902	2623.15	2558.03	65.114	2408.28	2380	28.281	2992.77	2936.62	56.15	2340.04	2376.78	-36.738	2518.01	2444.99	73.024	2884.8	2787.47
2404.8	2398.69	6.108	2392.97	2379.42	13.549	3049.54	2983.01	66.534	2131.9	2167.75	-35.844	2140.78	2195.65	-54.872	2681.41	2655.41	26.007	2782.43	2696.8	85.633	3070.58	2781.63	288.95	2613.68	2393.78	219.899	2280.46	2283.92	-3.452	2402.55	2401.13	1.418	2636.45	2547.71	88.739	2416.64	2371.11	45.529	2975.54	2927.74	47.795	2359.01	2378.01	-18.998	2505.04	2434.77	70.273	2870.96	2787.24
2395.88	2379.82	16.054	2397.77	2359.88	37.895	3046.28	2975.39	70.895	2101.49	2167.23	-65.744	2129.66	2186.68	-57.022	2687.82	2650.37	37.456	2802.7	2683.94	118.765	3061.19	2765.01	296.182	2604.04	2386.22	217.812	2260.03	2281.44	-21.411	2396.91	2385.59	11.314	2644.54	2549.98	94.556	2412.75	2367.96	44.787	2962.77	2908.33	54.445	2323.83	2366.22	-42.386	2480.9	2414.37	66.525	2843.72	2749.14
2420.26	2366.32	53.944	2381.88	2345.86	36.013	3009.63	2949.24	60.391	2095.22	2167.72	-72.496	2131.94	2187.16	-55.221	2675.3	2650.78	24.511	2786.74	2684.47	102.261	3027.48	2762.01	265.468	2630.27	2389.91	240.361	2235.58	2279.26	-43.678	2380.91	2377.54	3.37	2644.65	2537.98	106.669	2397.78	2365.24	32.544	2945.48	2885.85	59.628	2300.05	2345.22	-45.165	2454.51	2385.47	69.043	2824.05	2719.91
2405.07	2344.74	60.336	2409.17	2333.13	76.044	2995.83	2925.65	70.18	2111.68	2170.16	-58.474	2134.07	2182.69	-48.625	2629.32	2650.29	-20.968	2766.18	2688.02	78.167	3041.89	2770.61	271.286	2644.37	2381.55	262.828	2248.75	2272.3	-23.55	2413.48	2391.42	22.059	2657.62	2556.88	100.743	2370.97	2367.31	3.655	2936.96	2879.77	57.188	2309.26	2338.72	-29.454	2470.26	2377.93	92.327	2816.14	2706.52
2423.73	2341.26	82.471	2423.56	2318	105.559	2997.04	2913.93	83.112	2130.55	2164.69	-34.141	2111.49	2180.28	-68.791	2673.68	2645.26	28.419	2800.09	2687.65	112.443	3063.23	2774	289.227	2666.16	2380.34	285.814	2244.98	2271.42	-26.439	2396.32	2392.8	3.517	2657.08	2549.16	107.922	2389.7	2363.6	26.108	2945.47	2883.25	62.213	2313.95	2342.81	-28.864	2479.42	2375.14	104.283	2815.62	2706.21
2428.88	2336.55	92.332	2445.38	2315.96	129.418	2987.99	2908.66	79.329	2110.03	2166.28	-56.252	2114.78	2180.22	-65.431	2676.52	2641.04	35.482	2804.25	2673.46	130.785	3075.51	2764.25	311.258	2663.09	2380.13	282.957	2222.22	2277.39	-55.17	2413.04	2384.45	28.589	2675.36	2548.98	126.379	2407.71	2363.69	44.025	2919.05	2864.45	54.607	2291.88	2326.32	-34.445	2435.32	2354.63	80.688	2804.42	2696.89
2437.78	2330.72	107.067	2419.57	2305.17	114.407	3002.98	2914.84	88.135	2093.59	2154.44	-60.852	2098.69	2172.72	-74.024	2736.18	2641.36	94.818	2773.04	2673.76	99.278	2949.54	2762.73	186.814	2666.28	2384.98	281.301	2231.56	2268.16	-36.602	2364.82	2367.6	-2.784	2659.66	2537.22	122.438	2369.15	2358.54	10.605	2914.67	2864.85	49.819	2288.56	2319.85	-31.292	2441.93	2360.32	81.603	2807.49	2706.85
2468.05	2345.51	122.531	2453.99	2310.91	143.084	3033.63	2923.24	110.39	2078.27	2148.91	-70.647	2098.96	2173.64	-74.676	2715.51	2627.66	87.854	2763.61	2661.17	102.44	3068.31	2745.5	322.81	2666.69	2363.63	303.061	2207.37	2265.36	-57.994	2382.8	2372.32	10.477	2651.97	2532.84	119.126	2336.06	2346.42	-10.357	2924.17	2869.53	54.64	2292.02	2326.66	-34.639	2440.67	2367.42	73.249	2815.91	2708.8
2475.52	2356.35	119.172	2475.6	2324.9	150.703	3068.46	2941.82	126.64	2084	2149.36	-65.36	2099.19	2162.3	-63.108	2736.99	2619.39	117.599	2770.09	2658.63	111.465	2984.28	2732.19	252.087	2629.21	2358.24	270.974	2202.79	2247.09	-44.295	2359.74	2368.35	-8.607	2622.04	2531.32	90.72	2336.08	2338.7	-2.617	2930.48	2875.74	54.734	2300.77	2327.8	-27.033	2446.86	2370.25	76.611	2818.69	2716.36
2473.29	2367.61	105.675	2481.23	2334.25	146.981	3093.36	2954.98	138.375	2092.01	2143.01	-51.002	2080.71	2156.99	-76.277	2778.94	2620.26	158.684	2749.13	2640.23	108.9	2969.79	2727.01	242.779	2629.82	2347.62	282.204	2187.75	2247.82	-60.071	2350.22	2366.68	-16.458	2644.32	2522.17	122.149	2329.32	2336.98	-7.657	2936.45	2895.3	41.147	2318.2	2347.72	-29.516	2476.65	2388.94	87.71	2835.49	2728.78
2479.52	2390.27	89.253	2532.26	2349.16	183.094	3134.91	2991.08	143.834	2072.82	2147.88	-75.065	2106.14	2160.77	-54.629	2846.69	2617.49	229.201	2691.74	2642.26	49.481	2994.75	2718.33	276.415	2607.75	2349.09	258.664	2206.36	2235.7	-29.346	2339.01	2350.45	-11.445	2618.45	2518.68	99.771	2304.25	2321.08	-16.832	2958.28	2912.55	45.729	2318.52	2363.96	-45.44	2493.17	2401.9	91.271	2846.46	2744.84
2476.3	2395.73	80.569	2557.22	2365.82	191.39	3201.03	2998.49	202.54	2082.56	2140.43	-57.863	2105.31	2151.06	-45.747	2816.2	2608.33	207.875	2723.85	2638.52	85.326	2935.99	2713.3	222.689	2634.93	2341.16	293.767	2189.8	2227.11	-37.315	2357.29	2355.18	2.11	2615.68	2504.6	111.085	2329.58	2321.55	8.022	2998.49	2947.3	51.184	2345.01	2388.45	-43.439	2529.32	2412.33	116.984	2865.07	2766.86
2448.75	2396.95	51.805	2531.91	2364.11	167.803	3202.94	3007.8	195.143	2063.88	2139.23	-75.351	2091.6	2150.7	-59.109	2983.06	2614.68	368.384	2752.96	2647.05	105.912	2916.54	2721.62	194.92	2646.18	2343.51	302.662	2264.22	2234.75	29.469	2352.59	2351.65	0.938	2634.08	2509.82	124.255	2285.58	2318.36	-32.783	2988.83	2940.37	48.464	2346.85	2392.01	-45.162	2515.11	2425.31	89.801	2883.72	2759.61
2430.48	2410.12	20.361	2508.54	2377.93	130.614	3193.26	3006.27	186.991	2072.9	2139.09	-66.187	2102.6	2151.11	-48.511	3012.05	2610.91	401.136	2785.2	2649.64	135.56	3016.08	2714.22	301.86	2602.43	2343.87	258.568	2263.57	2228.86	34.711	2361.8	2346.67	15.137	2617.59	2508.58	109.012	2316.41	2327.09	-10.679	2983.59	2916.09	67.494	2324.2	2366.36	-42.155	2510.11	2426.09	84.029	2875.68	2757.03
2437.11	2384.33	52.789	2532.25	2349.03	183.219	3187.02	2978.53	208.492	2064.08	2142.32	-78.245	2096.55	2156.07	-59.526	3061.69	2617.63	444.059	2769.47	2653.86	115.603	2947.06	2729.78	217.278	2587.94	2352.81	235.13	2264.59	2235.38	29.208	2358.21	2349.78	8.431	2623.15	2521.5	101.647	2301.24	2328.85	-27.615	2936.47	2875.44	61.033	2310.66	2341.19	-30.528	2501.49	2386.2	115.285	2829.28	2708.76
2453.65	2359.09	94.554	2447.45	2338.18	109.265	3178.04	2962.22	215.821	2100.78	2153.56	-52.777	2134.78	2169.44	-34.654	3177.41	2630.22	547.185	2776.05	2676.35	99.694	2897.21	2742.25	154.965	2610.62	2364.8	245.821	2297.74	2248.91	48.835	2377.82	2373.03	4.789	2648.21	2532.99	115.215	2300.05	2353.89	-53.836	2920.03	2850.58	69.455	2296.37	2324.7	-28.327	2460.54	2361.94	98.608	2802.89	2693.23
2455.43	2358.61	96.828	2476.53	2330.39	146.14	3183.39	2948.48	234.912	2114.03	2147.88	-33.854	2123.49	2168.28	-44.793	3206.3	2633.2	573.092	2823.33	2674.17	149.163	3003.48	2744.02	259.461	2601.94	2363.18	238.767	2265.23	2254.69	10.541	2361.7	2367.56	-5.862	2593.76	2537.68	56.085	2340.58	2349.43	-8.849	2920.4	2855.05	65.345	2281.46	2316.19	-34.738	2495.34	2360.06	135.282	2815.62	2692.04
2464.67	2359.29	105.373	2450.48	2330.15	120.331	3217.63	2953.87	263.762	2101.93	2165.56	-63.63	2134	2178.45	-44.453	3039.42	2657.91	381.507	2794.58	2682.57	112.006	2991.16	2764.68	226.478	2609.15	2374.23	234.92	2331.05	2264.47	66.577	2374.64	2372.89	1.746	2654.8	2543.94	110.853	2330.81	2355.48	-24.671	2921.96	2846.26	75.705	2292.78	2313.14	-20.355	2475.99	2359.72	116.27	2835.36	2696.96
2438.71	2360.41	78.299	2460.62	2330.95	129.667	3221.85	2962.94	258.912	2117.11	2155.62	-38.509	2127.57	2169.1	-41.533	2999.79	2652.21	347.576	2782.78	2692.08	90.697	3045.94	2760.57	285.372	2590.99	2375.59	215.394	2361.76	2264.3	97.46	2339.56	2370.46	-30.894	2624.24	2540.18	84.055	2290.22	2348.96	-58.742	2920.01	2857.63	62.381	2285.24	2316.11	-30.869	2505.45	2361.23	144.225	2851.35	2689.93
2478.55	2357.74	120.811	2439.8	2329.52	110.275	3190.86	2955.32	235.533	2116.1	2152.79	-36.691	2120.81	2160.72	-39.909	2914.74	2634.37	280.369	2753.92	2668.42	85.493	2988.03	2756.59	231.441	2573.04	2362.53	210.511	2390.39	2246.63	143.762	2340.99	2360.38	-19.393	2606.1	2521.1	85.004	2284.93	2339.62	-54.684	2930.34	2878.16	52.187	2289.38	2324.81	-35.432	2541.23	2366.18	175.058	2837.07	2713.11
2473.59	2367.89	105.69	2416.29	2334.22	82.068	3176.26	2962.69	213.565	2087.19	2142.95	-55.764	2120.44	2155.91	-35.468	2768.87	2612.71	156.163	2724	2642.51	81.487	2946.41	2722.64	223.772	2523.18	2350.82	172.37	2374.3	2234.2	140.1	2352.04	2357.5	-5.463	2598.68	2513.3	85.384	2319.39	2326.17	-6.775	2944.6	2890.55	54.059	2310.27	2334.3	-24.032	2561.8	2375.17	186.634	2859.75	2719.78
2485.96	2377.12	108.843	2409.08	2328.29	80.793	3186.16	2968.09	218.072	2088.6	2133.95	-45.351	2114.22	2151.85	-37.621	3159.02	2597.07	561.954	2704.55	2629.12	75.428	2936.06	2712.76	223.299	2466.16	2341.61	124.552	2246.1	2222.24	23.858	2341.82	2359.78	-17.957	2595.77	2511.34	84.43	2293.81	2329.83	-36.024	2955.01	2905.51	49.5	2343.57	2352.53	-8.965	2540.82	2381.91	158.916	2865.55	2724.68
2486.22	2383.2	103.023	2367.64	2333	34.637	3179.46	2970.43	209.033	2092.59	2137.23	-44.645	2110.06	2148.08	-38.018	3170.7	2607.07	563.629	2705.79	2631.65	74.143	2890.03	2709.48	180.549	2454.79	2332.5	122.29	2330.35	2216.32	114.032	2336.11	2365.19	-29.081	2587.23	2510.84	76.39	2294.05	2326.5	-32.45	2979.41	2919.19	60.226	2356.9	2375.63	-18.737	2605.47	2395.02	210.453	2869.55	2745.96
2497.43	2408.11	89.316	2402.61	2361.62	40.998	3217.15	3011.4	205.744	2114.58	2142.67	-28.089	2144.83	2160.94	-16.113	2965.61	2625.8	339.815	2755.98	2673.09	82.896	2944.8	2746.52	198.273	2477.65	2361.41	116.246	2373.39	2241.37	132.018	2359.45	2372.75	-13.303	2609.3	2537.03	72.267	2349.89	2336.11	13.771	3011.37	2958	53.372	2403.12	2401.98	1.144	2613.56	2421.22	192.345	2890.75	2765.21
2484.37	2410.16	74.211	2439.08	2366.55	72.531	3228.88	2999.89	228.99	2122.85	2166.25	-43.401	2130.02	2181.19	-51.164	3074.91	2659.4	415.511	2782.26	2692.95	89.31	2965.41	2768.33	197.084	2501.37	2378	123.372	2382.61	2261.19	121.414	2401.54	2380.56	20.975	2640.75	2552.18	88.565	2353.75	2366.56	-12.807	3021.51	2959.51	61.997	2400.25	2403.94	-3.69	2611.47	2430.15	181.317	2920.05	2768.71
2460.26	2422.32	37.937	2426.15	2371.86	54.289	3222.91	3025.18	197.731	2136.6	2185.32	-48.728	2153.11	2199.35	-46.241	3000.33	2685.41	314.917	2758.38	2713.09	45.288	3029.36	2794.08	235.275	2524.17	2397.57	126.604	2387.76	2278.59	109.174	2414.91	2399.8	15.11	2652.38	2571.7	80.679	2434.56	2385.41	49.147	3017.61	2959.13	58.486	2412.86	2406.88	5.98	2615.32	2432.39	182.938	2901.34	2777.3
2478.58	2409.32	69.257	2410.68	2375.33	35.35	3196.25	3011.57	184.683	2159.2	2205.61	-46.411	2171.82	2215.88	-44.065	2933.51	2697.54	235.976	2772.83	2735.69	37.139	3041.95	2815.94	226.01	2526.44	2418.52	107.923	2395.9	2289.02	106.878	2423.23	2429.14	-5.916	2666.74	2592.27	74.472	2416.59	2394.07	22.515	3005.67	2945.2	60.476	2406.21	2395.75	10.461	2589.71	2415.22	174.492	2877.59	2763.83
2423.76	2396.07	27.688	2357.26	2354.49	2.775	3151.7	2981.22	170.487	2163.58	2205.17	-41.59	2152.97	2218.22	-65.245	3058.02	2697.85	360.169	2767.24	2734.14	33.098	3037.75	2811.69	226.057	2505.63	2422.28	83.349	2413.75	2296.63	117.124	2464.86	2432.9	31.96	2680.78	2605.27	75.515	2498.91	2411.15	87.754	2998.32	2919.34	78.975	2444.41	2376.06	68.351	2549.33	2400.45	148.885	2846.95	2732.69
2418.36	2370.22	48.143	2383	2333.35	49.656	3099.79	2959.53	140.258	2171.58	2213.44	-41.862	2180.27	2229.91	-49.64	3037.48	2706.89	330.588	2773.99	2739.49	34.493	3114.76	2820.52	294.24	2519.89	2422.95	96.938	2414.15	2298	116.152	2490.7	2433	57.707	2677.18	2604.01	73.169	2472.07	2399.61	72.463	2974.26	2892.51	81.75	2431.92	2359.11	72.815	2545.55	2376.55	168.998	2827.26	2712.91
2404.64	2366.49	38.154	2394.27	2327.08	67.192	3066.45	2958.45	108.01	2188.97	2215.38	-26.409	2177.11	2228.67	-51.56	3049.39	2713.6	335.786	2791	2746.5	44.501	3093.95	2826.73	267.221	2525.37	2433.24	92.128	2377	2302.73	74.273	2482.42	2427.97	54.458	2709.19	2601.06	108.135	2438.11	2409.15	28.954	2986.95	2894.46	92.496	2476.06	2358.84	117.222	2508.91	2370.36	138.553	2814.1	2709.48
2427.5	2343.02	84.483	2435.28	2310.58	124.694	3001.24	2932.04	69.196	2181.8	2202.28	-20.479	2165.54	2222.57	-57.022	3034.29	2706.46	327.831	2791.12	2753.54	37.575	3154.2	2817.23	336.976	2522.31	2441.32	80.984	2384.42	2308.7	75.714	2470.26	2425.56	44.698	2719.84	2605.97	113.873	2458.9	2407.96	50.938	2992.18	2872.07	120.108	2455.51	2336.49	119.022	2466	2344.26	121.741	2790.5	2697.49
2422.61	2323.57	99.034	2396.36	2297.05	99.307	3017.71	2905.19	112.524	2166.99	2204.59	-37.597	2152.01	2217.53	-65.519	2984.83	2694.82	290.014	2764.6	2746.77	17.827	3175.93	2817.97	357.958	2513.32	2422.04	91.276	2389.1	2307.05	82.051	2476.1	2406.47	69.623	2705.43	2586.61	118.822	2452.66	2390.85	61.81	2976.07	2843.85	132.213	2434.32	2307.85	126.474	2477.36	2331.88	145.483	2770.39	2671.44
2438.02	2320.06	117.963	2409.53	2275.52	134.006	2974.36	2878.27	96.084	2168.18	2183.58	-15.393	2146.48	2192.86	-46.375	2859.61	2671.15	188.466	2728.89	2730.2	-1.303	3076.85	2786.68	290.176	2483.53	2406.55	76.981	2327.94	2279.57	48.375	2454.7	2385.31	69.387	2678.64	2557.24	121.401	2490.8	2364.06	126.734	2964.52	2818.84	145.678	2448.78	2297.62	151.16	2439.68	2307.05	132.632	2730.55	2654.12
2440.42	2317.36	123.052	2494.19	2271.06	223.128	2964.4	2875.44	88.968	2149.33	2162.8	-13.47	2130.53	2181.76	-51.228	2836.95	2640.17	196.776	2680.47	2700.83	-20.354	3291.75	2748.67	543.085	2469.02	2372.66	96.36	2314.53	2244.31	70.221	2434.75	2361.29	73.462	2626.51	2518.15	108.359	2433.63	2342.1	91.535	2968.88	2807.41	161.462	2421.79	2279.52	142.267	2433.21	2297.62	135.592	2723.17	2644.27
2400.24	2312.65	87.591	2519.87	2262.51	257.355	2948.28	2873.09	75.187	2121.63	2143.13	-21.495	2109.52	2155.93	-46.411	2624.55	2607.52	17.032	2645.62	2657.59	-11.973	3120.03	2716.51	403.521	2449.55	2358.75	90.796	2257.37	2228.09	29.283	2404.37	2354.83	49.536	2635.95	2495.56	140.387	2419.33	2317.39	101.947	2997.04	2827.71	169.329	2456.89	2296.84	160.043	2429.36	2303.89	125.478	2733.17	2650.78
2381.58	2322.11	59.464	2606.88	2284.44	322.439	2977.64	2898.47	79.167	2108.57	2132.6	-24.034	2084.61	2142.95	-58.342	2775.03	2592.86	182.173	2637.19	2634.83	2.367	3243.89	2698.98	544.911	2458.2	2337.49	120.705	2229.53	2218.22	11.31	2401.82	2335.87	65.957	2683.44	2489.19	194.251	2465.62	2303.6	162.025	3020.3	2830.64	189.658	2452.7	2305.39	147.317	2453.96	2311.26	142.707	2740.03	2658.75
2413.9	2331.01	82.886	2669.34	2296.57	372.768	2985.99	2902.72	83.267	2090.76	2111.69	-20.933	2079.29	2132.06	-52.777	2670.66	2576.4	94.258	2643.22	2631.57	11.65	2946.97	2685.5	261.474	2449.5	2322.99	126.507	2262.33	2211.61	50.714	2383.44	2327.05	56.391	2690.55	2469.32	221.232	2410.04	2288.34	121.7	3033.52	2823.53	209.99	2464.37	2303.72	160.652	2465.4	2311.58	153.815	2743.17	2655.9
2394.91	2307.03	87.881	2498.36	2271.96	226.396	2939.75	2873.58	66.172	2075.49	2103.17	-27.683	2073.47	2118.55	-45.077	2707.26	2574.86	132.395	2625.42	2625.34	0.073	3045.85	2685.43	360.414	2435.16	2321.89	113.265	2203.95	2196.25	7.702	2369.82	2307.24	62.584	2707.03	2458.5	248.532	2420.82	2274.83	145.988	3029.52	2803.88	225.64	2473.61	2286.87	186.734	2408.39	2285.41	122.982	2703.62	2637.05
2422.55	2283.65	138.907	2507.61	2241.34	266.272	2909.67	2836.67	72.998	2064.63	2089.73	-25.096	2053.74	2096.76	-43.02	2708.26	2559.66	148.602	2627.88	2613.13	14.747	3332.57	2668.05	664.521	2451.7	2309.49	142.203	2201.36	2186.22	15.132	2368.41	2285.13	83.281	2720.91	2451.13	269.78	2341.4	2271.72	69.677	3023.08	2793.61	229.467	2431.62	2273.09	158.532	2399.37	2278.66	120.716	2701.24	2621.05
2403.43	2277.6	125.827	2400.67	2240.73	159.944	2921.7	2833.35	88.352	2075.59	2090.75	-15.161	2052	2096.57	-44.578	2622.61	2547.3	75.314	2627.45	2610.43	17.019	3105.13	2672.07	433.062	2453.23	2300.24	152.992	2162.63	2184.16	-21.524	2364.58	2284.82	79.762	2714.63	2442.09	272.539	2408.53	2261.07	147.455	3028.58	2784.19	244.392	2433.99	2267.14	166.848	2373.16	2280.92	92.244	2699.39	2614.34
2428.95	2292.99	135.966	2764.63	2239.65	524.976	2890.57	2842.5	48.071	2098.06	2080.03	18.024	2045.1	2093.68	-48.583	2663.24	2545.68	117.561	2616.85	2604.87	11.973	3328.54	2655.57	672.968	2439.45	2294.15	145.304	2226.47	2182.75	43.723	2328.11	2295.16	32.951	2635.02	2448.55	186.464	2452.2	2276.5	175.698	3033.97	2799.85	234.123	2441.19	2274.91	166.279	2407.54	2285.44	122.099	2703.95	2632.91
2448.48	2277.49	170.984	2760.33	2244.19	516.136	2914.96	2841.54	73.423	2054.04	2085.4	-31.364	2037.99	2091.49	-53.491	2647.33	2543.32	104.008	2622.78	2609.55	13.233	3417.89	2654.84	763.053	2462.78	2294.18	168.603	2201.53	2178.56	22.974	2282.77	2289.8	-7.031	2676.34	2450.51	225.839	2377.62	2265.36	112.263	3017.23	2796.31	220.923	2416.18	2273.36	142.816	2404.28	2286.06	118.221	2704.7	2627.71
2438.67	2304.01	134.667	2712.33	2254.47	457.853	2932.17	2866.55	65.626	2055.5	2090.53	-35.024	2052.17	2097.41	-45.246	2636.54	2544.23	92.317	2627.98	2608.64	19.342	3355.64	2674.84	680.804	2441.11	2295.48	145.63	2193.95	2179.13	14.817	2331.3	2293.22	38.075	2695.29	2446.02	249.27	2349.48	2269.1	80.378	3025.47	2802.19	223.284	2401.73	2288.62	113.118	2445.59	2291.66	153.924	2730.07	2643.03
2438.18	2303.32	134.859	2847.92	2272.97	574.947	2951.61	2872.15	79.458	2097.27	2081.78	15.493	2050.6	2095.32	-44.716	2729.8	2549.56	180.233	2635.98	2613.32	22.654	3385.41	2654.85	730.554	2442.54	2292.05	150.488	2203.95	2178.37	25.587	2343.7	2298.77	44.93	2725.09	2452.62	272.464	2395.7	2268.32	127.382	2978.12	2817.28	160.84	2396.16	2281.06	115.1	2475.69	2304.54	171.146	2736.46	2636.76
2434.04	2296.04	138.008	2812.08	2262.45	549.629	2950.24	2877.69	72.558	2083.21	2082.37	0.835	2035.67	2105.65	-69.976	2651.03	2550.21	100.824	2630.04	2609.04	20.998	3168.21	2671.39	496.82	2450.91	2287.2	163.713	2215.63	2176.91	38.72	2338.08	2298.58	39.497	2729.6	2465.74	263.866	2407.42	2269.51	137.911	2925.58	2791.97	133.616	2389.63	2269.4	120.23	2453.89	2286.96	166.931	2717.2	2625.32
2437.49	2298.16	139.331	2787.14	2262.36	524.789	2917.07	2870.68	46.39	2086.44	2089.34	-2.902	2041.14	2104.44	-63.303	2607.32	2555.1	52.224	2639.4	2618.03	21.371	3278.68	2664.84	613.844	2431.93	2295.52	136.41	2168.04	2176.2	-8.167	2329.94	2299.52	30.426	2705.11	2457.17	247.944	2403.76	2281.04	122.715	2912.32	2794	118.315	2357.47	2268.58	88.889	2490.4	2283.28	207.113	2691.05	2632.86
2469.06	2310.95	158.105	2802.21	2267.76	534.451	2961.05	2885.15	75.898	2073.66	2097.06	-23.406	2039.49	2100.4	-60.909	2694.3	2548.98	145.323	2625.76	2605.06	20.702	2784.41	2659.47	124.943	2419.87	2280.56	139.313	2198.39	2172.66	25.732	2326.3	2309.05	17.243	2731.1	2462.85	268.249	2347.46	2276.18	71.282	2956.54	2820.62	135.914	2363.1	2280.56	82.537	2529.21	2315.07	214.136	2739.6	2652.52
2461.08	2332.24	128.846	2799.36	2296.07	503.292	3007.99	2921.23	86.765	2066.49	2099.14	-32.653	2049.24	2110.78	-61.538	2804.99	2565.53	239.459	2653.69	2613.51	40.18	3301.79	2667.22	634.575	2404.95	2299.44	105.511	2165.89	2182.07	-16.181	2302.68	2312.95	-10.276	2707.69	2464.11	243.585	2295.06	2286.11	8.954	2969.64	2849.04	120.599	2375.74	2311.91	63.833	2588.42	2332.68	255.741	2752.45	2682.69
2474.02	2352.79	121.226	2687.4	2307.69	379.71	3003.25	2934.75	68.502	2098.3	2102.43	-4.139	2052.73	2113.25	-60.517	2903.76	2560.16	343.599	2643.84	2615.26	28.582	3291.84	2670.34	621.495	2398.57	2292.48	106.093	2175.53	2179.89	-4.366	2282.48	2312.44	-29.956	2720.95	2455.35	265.593	2303.34	2275.41	27.923	3056.51	2879.06	177.441	2387.39	2338.2	49.188	2615.14	2359.68	255.467	2796.47	2701.05
2436.08	2356.32	79.763	2680.32	2318.61	361.709	3029.19	2947.68	81.515	2074.94	2100.86	-25.917	2075.41	2110.52	-35.104	2922.59	2561.88	360.718	2661.74	2618.23	43.513	3246.91	2676.28	570.635	2423.48	2305.3	118.179	2269.13	2189.02	80.115	2307.99	2300.03	7.968	2703.51	2457.5	246.003	2288.36	2268.41	19.959	3076.08	2900.66	175.421	2392.47	2357.83	34.635	2692.9	2380.37	312.529	2780.11	2710.89
2421.44	2359.21	62.23	2647.5	2312.43	335.068	3060.28	2934.77	125.505	2066.06	2103.24	-37.178	2080.46	2121.37	-40.91	2964.94	2575.74	389.197	2688.18	2638.82	49.361	2999.86	2694.97	304.886	2439.48	2319.45	120.026	2305.16	2200.39	104.773	2309.33	2297.74	11.595	2698.7	2471.52	227.18	2271.6	2291.06	-19.455	3070.55	2900.77	169.779	2362.51	2350.39	12.114	2721.67	2377.29	344.382	2785.5	2717.09
2420.24	2353.14	67.105	2642.4	2310.63	331.766	3053.19	2935.6	117.588	2087.28	2116.84	-29.557	2067.53	2126.16	-58.637	3098.05	2584.53	513.519	2760.28	2659.39	100.888	3195.43	2714	481.434	2453.77	2337.8	115.978	2219.29	2212.47	6.821	2314.16	2319.41	-5.254	2728.97	2497.36	231.608	2302.65	2302.71	-0.06	3034.5	2865.78	168.717	2363.14	2338.75	24.392	2727.62	2366.5	361.119	2770.02	2689.97
2414.84	2339.13	75.706	2635.06	2300.71	334.345	3027.58	2918.3	109.277	2087.77	2128.1	-40.325	2089.99	2146.48	-56.49	3104.33	2623.09	481.232	2761.84	2688.61	73.233	3280.3	2738.45	541.85	2456.42	2350.93	105.499	2382.8	2236.1	146.708	2324.54	2354.96	-30.412	2755	2535.99	219.013	2363.55	2333.39	30.161	3007.88	2847.49	160.39	2342.58	2311.09	31.487	2720.87	2335.13	385.74	2752.18	2671.47
2421.55	2323.71	97.841	2481.42	2284.28	197.143	2988.83	2892.78	96.046	2146.91	2154.55	-7.647	2128.05	2169.91	-41.858	3037.34	2648.52	388.818	2776.11	2725.44	50.665	3290.83	2759.93	530.9	2480.22	2374.94	105.279	2370.21	2246.63	123.578	2361.63	2376.91	-15.284	2765.4	2556.97	208.428	2366.27	2358.46	7.809	2957.55	2817.53	140.021	2302.35	2291.74	10.608	2727.53	2317.67	409.859	2727.55	2649.74
2409.35	2319.41	89.937	2603.73	2280.25	323.476	2979.96	2893.45	86.51	2130.87	2170.49	-39.613	2149.72	2188.01	-38.285	3195.64	2652.38	543.261	2723.42	2734.41	-10.993	3025.93	2768.25	257.681	2477.14	2384.07	93.071	2425.24	2255.98	169.265	2360.88	2397.4	-36.528	2771.78	2575.37	196.409	2375.65	2376.65	-0.997	2935.99	2815.31	120.675	2267.37	2282.18	-14.812	2611.62	2319.53	292.093	2710.74	2643.49
2413.05	2305.92	107.129	2579.78	2277.62	302.161	2999.14	2885.46	113.679	2149.8	2176.43	-26.63	2150.14	2191.08	-40.946	3208	2663.27	544.731	2796.49	2734.51	61.975	3161.43	2772.85	388.578	2489.11	2387.07	102.038	2415.19	2256.88	158.31	2427.84	2393.88	33.964	2769.42	2565.73	203.695	2354.89	2370.44	-15.544	2925.13	2796	129.134	2237	2269.38	-32.377	2482.93	2304.48	178.447	2698.97	2628.85
2424.36	2315.93	108.429	2566.68	2273.65	293.027	2965.15	2888.81	76.346	2167.52	2184.2	-16.682	2142.52	2201.69	-59.169	3039.46	2668.44	371.022	2770.09	2741.73	28.367	3164.63	2788.41	376.218	2475.45	2389.23	86.217	2344.05	2278.55	65.5	2440.59	2390.93	49.66	2749.92	2562.23	187.695	2295.15	2365.97	-70.828	2926.91	2800.81	126.102	2260.14	2276.39	-16.253	2230.64	2314.8	-84.154	2724.24	2637.42
2403.12	2326.67	76.444	2551.38	2295.82	255.551	3032.14	2906.61	125.529	2128.04	2181.12	-53.076	2149.18	2196.88	-47.696	3129.87	2665.63	464.244	2813.64	2742.37	71.274	3212.72	2785.87	426.848	2489.78	2397.04	92.744	2473.81	2270.44	203.365	2429.52	2393.56	35.96	2746.64	2561.57	185.073	2330.83	2373.15	-42.313	2940.17	2822.09	118.074	2268.1	2287.42	-19.326	2243.3	2325.55	-82.241	2718.23	2653.44
2406.96	2334.82	72.143	2526.22	2295.08	231.14	3035.03	2901.16	133.873	2126.75	2184.69	-57.943	2143.59	2187.32	-43.726	3175.38	2664.69	510.69	2783.1	2737.99	45.111	3164.1	2777.29	386.805	2477.95	2389.19	88.763	2427.77	2264.42	163.352	2452.04	2376.13	75.908	2713.07	2546.6	166.468	2348.41	2353.4	-4.984	2964.61	2825.63	138.987	2298.22	2297.54	0.681	2240.48	2324.63	-84.153	2739.72	2666.17
2397.26	2332.41	64.849	2519.97	2305.02	214.951	3016.95	2922.01	94.937	2146.61	2174.6	-27.996	2149.84	2191.74	-41.898	3108.46	2669.24	439.226	2801.95	2738.76	63.195	3136.76	2784.49	352.271	2481.75	2397.41	84.341	2385.55	2277.02	108.531	2448.55	2384.48	64.075	2683.12	2554.63	128.494	2369.37	2362.29	7.074	2984.56	2859.53	125.039	2333.77	2317.96	15.809	2261.78	2350.32	-88.535	2737.51	2680.46
2365.03	2321.15	43.884	2476.22	2277.39	198.825	2962.7	2894.38	68.321	2115.93	2170.89	-54.962	2115.08	2177.76	-62.683	3054.24	2648.77	405.467	2752.42	2726.06	26.353	3146.94	2772.68	374.263	2429.3	2383.87	45.423	2396.71	2253.66	143.048	2440.53	2378.39	62.142	2673.88	2554.18	119.699	2366.28	2358.57	7.703	2983.07	2842.72	140.356	2322.25	2308.81	13.437	2325.38	2344.29	-18.912	2721.11	2676.27
2362.06	2324.57	37.489	2435.85	2274.02	161.837	2956.92	2885.6	71.315	2115.52	2160.25	-44.729	2112.42	2168.34	-55.917	3058.22	2639.1	419.12	2743.71	2705.36	38.352	3131.33	2743.59	387.739	2401.07	2369.94	31.128	2375.96	2248.46	127.492	2408.95	2379.95	28.993	2653.07	2542.16	110.91	2356.64	2353.32	3.324	2996.41	2834.49	161.917	2315.61	2297.66	17.958	2423.31	2332.27	91.038	2717.16	2665.35
2361.37	2307.7	53.666	2413.87	2266.35	147.52	2943.39	2863.17	80.216	2109.57	2152.27	-42.699	2107.64	2167.97	-60.329	2922.14	2629.72	292.421	2721.54	2700.39	21.15	3050.13	2748.02	302.112	2400.75	2367.79	32.964	2270.03	2237.9	32.134	2438.58	2363.25	75.328	2625.61	2537.77	87.835	2372.12	2335.3	36.826	3028.06	2822.89	205.169	2313.14	2284.09	29.046	2320.05	2320.26	-0.208	2712.24	2652.76
2343.24	2292.62	50.625	2309.67	2252.82	56.854	2911.87	2846.56	65.317	2100.92	2142.57	-41.65	2092.96	2166.24	-73.28	2912.61	2616.29	296.329	2722.28	2691.03	31.253	3179.63	2739.89	439.749	2390.02	2354.53	35.498	2362.32	2238.86	123.456	2407.49	2356.24	51.247	2610.03	2525.37	84.655	2372.18	2333.17	39.011	3062.33	2804.38	257.95	2331.45	2277.04	54.408	2325.89	2316.74	9.155	2695.33	2640.88
2359.16	2270.22	88.933	2292.74	2240.16	52.577	2919.16	2837	82.164	2101.47	2143.65	-42.186	2091.7	2154.3	-62.595	2986.55	2617.01	369.539	2698.19	2687.11	11.08	3201.65	2725.12	476.534	2379.85	2354.68	25.169	2378.52	2237.95	140.566	2413.87	2353	60.872	2609.92	2516.54	93.381	2380.61	2330.81	49.798	3098.8	2795.14	303.664	2336.18	2262.67	73.513	2308.09	2295.14	12.945	2684.98	2613.27
2367.97	2266.63	101.339	2344.71	2222	122.712	2877.61	2820.17	57.447	2073.46	2131.51	-58.053	2075.5	2149.11	-73.601	2950.3	2607.73	342.572	2700.43	2680.49	19.947	3292.22	2720.77	571.451	2385.9	2349.32	36.578	2338.82	2225.77	113.049	2395.51	2334.2	61.302	2602.24	2506.77	95.474	2405.44	2308.64	96.803	3126.15	2783.36	342.789	2419.22	2247.78	171.446	2267.12	2288.08	-20.961	2669.48	2596.79
2401.82	2244.49	157.334	2249.25	2214.25	34.998	2856.59	2798.39	58.196	2081.21	2123.91	-42.702	2063.03	2134.02	-70.984	2891.9	2591.62	300.286	2693.79	2667.3	26.488	3398.46	2709.75	688.711	2377.89	2337.29	40.602	2304.85	2226.64	78.214	2354.37	2305.96	48.408	2577.15	2477.73	99.416	2405.13	2299.24	105.898	3204.78	2764.71	440.075	2438.04	2233.02	205.026	2237.9	2277.91	-40.011	2630.59	2591.19
2386.14	2255.56	130.58	2278.17	2219.98	58.186	2865.05	2793.62	71.421	2057.54	2109.45	-51.912	2042.05	2117.03	-74.978	2854.61	2558.23	296.381	2669.94	2637.84	32.098	3457.57	2687.1	770.475	2355.37	2315.26	40.112	2311.38	2200.45	110.935	2330.28	2288.91	41.379	2548.89	2443.07	105.817	2382.54	2274.06	108.481	3274.55	2749.61	524.942	2431.07	2219.03	212.039	2245.73	2263.87	-18.147	2644.2	2575.36
2406.12	2240.42	165.702	2266.94	2200.53	66.41	2834.85	2781.93	52.918	2030.57	2085.81	-55.241	2016.33	2110.45	-94.121	2791.39	2542.1	249.285	2626.8	2611.1	15.701	3476.7	2655.94	820.751	2334.05	2290.98	43.077	2262.92	2178.6	84.316	2327.66	2279.87	47.79	2540.72	2433.78	106.937	2434.61	2259.35	175.26	3334.2	2740.53	593.663	2530.73	2218.33	312.402	2198.22	2267.59	-69.366	2622.49	2564.68
2406.18	2240.41	165.767	2289.19	2202.75	86.439	2846	2785.8	60.204	2042.18	2090.25	-48.073	2031.83	2097.36	-65.527	2757.39	2532.66	224.726	2636.28	2602.7	33.588	3445.49	2647.11	798.378	2336.5	2292.37	44.134	2245.16	2175.59	69.569	2328.17	2264.9	63.268	2548.24	2418.43	129.816	2380.35	2248.93	131.419	3404.63	2743.6	661.027	2476.81	2216.55	260.26	2243.76	2266.2	-22.443	2619.46	2577.45
2386.33	2222.66	163.666	2302.53	2196.78	105.751	2808.92	2767.56	41.357	2013.01	2064.41	-51.402	2020.75	2078.27	-57.519	2700.62	2520.37	180.252	2613.24	2575.34	37.904	3652.38	2620.59	1031.79	2309.88	2269.89	39.992	2198.83	2146.87	51.966	2282.61	2253.3	29.31	2529.34	2395.71	133.628	2387.82	2234.57	153.246	3459.43	2730.44	728.983	2613.63	2196.09	417.541	2203.64	2258.44	-54.802	2600.72	2558.86
2346.85	2238.47	108.377	2321.39	2203.7	117.687	2823.55	2784.42	39.134	2013.65	2067.55	-53.909	2014.24	2068.83	-54.596	2550.23	2503.3	46.933	2612.82	2570.18	42.634	3742.12	2610.42	1131.7	2320.03	2255.37	64.657	2199.74	2140.66	59.082	2270.7	2248.45	22.252	2544.2	2391.93	152.265	2408.86	2221.04	187.815	3499.3	2722.58	776.726	2656.23	2195.68	460.549	2171.51	2249.15	-77.633	2599.55	2543.45
2299.59	2221.61	77.973	2321.15	2200.26	120.888	2791.17	2758.34	32.835	1997.52	2039.18	-41.658	1993.89	2057.46	-63.568	2653.9	2488.24	165.668	2591.57	2553.82	37.748	3686.22	2595.01	1091.21	2299.2	2239.07	60.131	2172.89	2126.31	46.579	2231.22	2246.22	-15.007	2531.47	2387.67	143.803	2438.09	2217.31	220.783	3571.2	2708.9	862.304	2661.05	2186.21	474.839	2168.06	2241.09	-73.032	2583.87	2533.45
2419.98	2214.42	205.568	2311.2	2176.62	134.582	2774.56	2749.54	25.018	1993.92	2038.79	-44.867	1994.76	2049.68	-54.917	2624	2483.93	140.071	2588.87	2544.84	44.026	3660.66	2581.76	1078.91	2292.63	2230.32	62.313	2174.75	2116.85	57.894	2255.01	2243.06	11.949	2533.12	2381.74	151.376	2345.41	2210.16	135.25	3485.88	2697.45	788.425	2477.05	2170.74	306.315	2170.14	2228.23	-58.093	2569.65	2526.73
2410.8	2212.66	198.14	2334.59	2179.38	155.204	2799.52	2753.05	46.47	1985.76	2044.89	-59.129	1989.73	2051.64	-61.907	2512.56	2483.97	28.594	2589.72	2532.64	57.082	3747.14	2574.3	1172.84	2302.1	2234.46	67.637	2154.64	2118.84	35.801	2235.49	2231.84	3.648	2534.92	2382.97	151.945	2421.05	2214.93	206.124	3601.1	2696.48	904.62	2655.41	2171.28	484.132	2176.29	2236.49	-60.202	2561.66	2519.24
2444.09	2224.09	219.999	2374.93	2180.42	194.513	2797.33	2755.88	41.455	2009.65	2035.24	-25.588	1996.16	2049.65	-53.489	2568.57	2478.92	89.648	2628.59	2549.48	79.111	3764.35	2584.22	1180.12	2322.33	2243.64	78.688	2149.67	2119.51	30.163	2249.04	2246.25	2.788	2568.24	2386.17	182.069	2415.01	2209.8	205.212	3585.85	2706.41	879.448	2573.35	2174.18	399.166	2147.69	2230.34	-82.657	2586.75	2522.85
2465.65	2224.99	240.656	2417.97	2202.8	215.168	2808.42	2784.51	23.909	1998.2	2041.12	-42.927	2004.29	2053.97	-49.676	2579.34	2492.57	86.774	2641.18	2555.9	85.289	3705.19	2597.03	1108.16	2328.91	2243.76	85.143	2166.28	2123.54	42.733	2260.14	2246.75	13.388	2569.36	2394.86	174.499	2376.63	2219.05	157.585	3635.38	2732.68	902.7	2437.61	2179.35	258.254	2190.22	2252.99	-62.765	2615.02	2560.43
2492.68	2253.13	239.544	2450.87	2215.81	235.057	2845.42	2815.36	30.057	2004.04	2040.28	-36.245	1985.49	2066.82	-81.324	2592.18	2500.02	92.162	2635.4	2553.94	81.461	3675.29	2603.26	1072.03	2340.99	2246.36	94.631	2118.04	2129.66	-11.62	2235.65	2239.24	-3.596	2552.04	2395.98	156.052	2235.22	2225.17	10.047	3688.91	2766.3	922.606	2658.14	2213.6	444.534	2170.05	2277	-106.954	2652.95	2583.37
2503.39	2269.39	234.001	2512.43	2235.43	277.003	2872.26	2835.93	36.322	1995.97	2037.94	-41.976	1987.13	2047.86	-60.726	2576.72	2494.37	82.343	2633.59	2553.86	79.732	3551.13	2595.85	955.283	2324.55	2241.03	83.518	2138.37	2121.74	16.623	2210.2	2239.06	-28.862	2567.59	2394.41	173.182	2190.41	2206.45	-16.032	3735.55	2785.24	950.31	2573.62	2226.35	347.269	2184.82	2284.42	-99.595	2686.23	2598.58
2514.69	2278.4	236.286	2515.89	2237.86	278.024	2900.08	2834.4	65.678	1988.26	2033.52	-45.258	1976.64	2044.19	-67.555	2541.8	2486.59	55.214	2608.82	2548.56	60.263	3701.8	2592.8	1109.01	2328.21	2243.61	84.598	2137.66	2123	14.652	2243.15	2238.51	4.64	2548.49	2395	153.488	2218.2	2217	1.201	3730.11	2815.43	914.677	2669.97	2245.34	424.634	2219.17	2316.2	-97.031	2698.14	2634.22
2485.83	2286.87	198.964	2538.47	2244.22	294.257	2904.46	2858.23	46.231	1982.44	2035.63	-53.193	1994.66	2036.99	-42.325	2567.59	2484.89	82.698	2621.48	2541.64	79.844	3153.22	2589.83	563.388	2332.51	2235.51	96.996	2145.88	2119.75	26.124	2209.57	2233.33	-23.763	2588.94	2388.93	200.013	2289.64	2211.56	78.082	3697.81	2829.03	868.789	2602.34	2253.04	349.3	2259.63	2316.73	-57.098	2693.41	2636.88
2515.86	2291.34	224.516	2568.59	2254.95	313.634	2914.95	2863.91	51.038	2001.19	2039.63	-38.432	1987.44	2049.19	-61.748	2545.13	2488.8	56.331	2649.86	2557.2	92.658	3495.17	2590.89	904.283	2338.35	2242.1	96.248	2148.09	2123.01	25.08	2241.74	2241.66	0.082	2533.85	2392.02	141.827	2373.27	2210.12	163.157	3424.51	2839.17	585.334	2653.93	2253.57	400.366	2258.41	2325.79	-67.384	2725.43	2646.33
2506.76	2301.91	204.853	2549.29	2260.12	289.173	2933.41	2872.31	61.096	2017.39	2039.65	-22.265	1985.66	2052.69	-67.026	2564.7	2500.09	64.613	2664.59	2559.2	105.389	3519.12	2598.55	920.569	2342.39	2245.05	97.342	2174.25	2125.54	48.713	2237.9	2245.79	-7.889	2619.08	2406.23	212.849	2381.29	2217.64	163.654	3455.92	2853.48	602.441	2251.93	2270.95	-19.018	2268.64	2339.28	-70.643	2703.68	2646.05
2479.13	2301.27	177.862	2564.25	2255.19	309.061	2930.04	2867.97	62.074	2003.88	2049.06	-45.184	2002.39	2054.8	-52.401	2558.08	2492.53	65.552	2651.72	2565.04	86.682	3502.65	2605.7	896.95	2326.07	2244.96	81.105	2173.01	2136.5	36.509	2241.55	2254.53	-12.98	2601.67	2407.18	194.483	2245.13	2224.46	20.664	3657.99	2850.45	807.542	2542.7	2268.49	274.219	2236.97	2336.97	-99.993	2704.83	2650.3
2488.72	2308.15	180.567	2544.92	2265.37	279.549	2936.26	2876.96	59.297	2031.95	2058.59	-26.641	2000.56	2072.16	-71.6	2518.68	2513.69	4.99	2661.75	2581.76	79.989	3453.48	2606.26	847.221	2332.46	2255.27	77.194	2207.44	2144.74	62.695	2235.77	2260.84	-25.075	2602.67	2420.53	182.133	2272.77	2233.45	39.323	3636.07	2841.24	794.832	2457.9	2262.01	195.897	2263.22	2330.74	-67.524	2712.71	2646.84
2484.77	2305.04	179.731	2568.32	2264.74	303.582	2929.15	2879.43	49.724	2029.77	2062.09	-32.316	2008.37	2072.25	-63.882	2534.25	2517.82	16.434	2685.56	2583.79	101.772	3311.48	2614.1	697.383	2328.99	2259.32	69.667	2174.59	2142.05	32.536	2265.92	2267.65	-1.722	2591.28	2429.39	161.889	2305.05	2248.21	56.835	3588.17	2839.42	748.748	2387.7	2269.45	118.25	2238.65	2334.06	-95.415	2708.59	2642.8
2478.55	2314.3	164.252	2559.99	2279.08	280.909	2948.17	2886.47	61.698	2027.57	2068.05	-40.49	2016.05	2081.82	-65.774	2570.1	2527.61	42.485	2660.42	2588.55	71.87	3308.14	2631.93	676.217	2319.69	2266.92	52.771	2143.36	2147.87	-4.509	2263.01	2278.53	-15.513	2590.95	2441.64	149.302	2284.5	2255.48	29.022	3542.92	2844.06	698.867	2564.5	2259.9	304.598	2258.15	2337.18	-79.035	2712.39	2641.36
2471.47	2315.8	155.677	2553.07	2273.68	279.388	2946.85	2880.22	66.629	2041.36	2079.99	-38.63	2034.17	2084.95	-50.771	2571.5	2536.59	34.918	2725.1	2597.54	127.561	3027.03	2644.39	382.641	2332.7	2276.28	56.427	2238.09	2152.92	85.173	2302.18	2276.39	25.79	2581.38	2433.39	147.985	2292.12	2247.87	44.255	3421.41	2843.15	578.265	2236.37	2267.05	-30.679	2292.67	2336.25	-43.583	2716.07	2643.78
2486.62	2310.01	176.607	2537.13	2274.94	262.195	2984.39	2868.45	115.938	2045.6	2074.93	-29.326	2035.64	2086.99	-51.345	2595.1	2539.85	55.252	2759.09	2615.33	143.761	3326.28	2655.77	670.512	2341.17	2284.28	56.887	2240.93	2166.6	74.328	2309.38	2283.34	26.041	2615.27	2449.99	165.28	2319.93	2259.16	60.763	3475.13	2828.53	646.598	2469.72	2262.26	207.467	2232.47	2327.14	-94.678	2706.35	2625.55
2418.3	2295.42	122.876	2519.87	2261.18	258.691	2967.53	2857.23	110.302	2055.69	2074.69	-18.994	2030.65	2091.32	-60.669	2603.11	2549.47	53.641	2792.76	2618.52	174.234	3164.21	2658.16	506.052	2357.3	2286.57	70.729	2237.93	2176.85	61.079	2315.22	2273.06	42.165	2590.93	2453.45	137.481	2331.3	2258.92	72.379	3421.35	2814.76	606.592	2504.43	2247.96	256.47	2199.53	2312.93	-113.393	2696.06	2616.98
2396.61	2293.54	103.067	2481.17	2260.64	220.527	2977.97	2854.37	123.601	2034.32	2091.57	-57.242	2032.23	2098.25	-66.016	2611.89	2553.15	58.734	2838.52	2631.72	206.805	3138.38	2666.87	471.506	2355.12	2300.28	54.84	2305.14	2179.24	125.906	2315.2	2282.51	32.683	2618.3	2469.85	148.448	2302.39	2271.51	30.875	3386.31	2799.65	586.664	2350.22	2243.9	106.322	2198.47	2309.48	-111.011	2680.46	2607.96
2400.54	2303.3	97.234	2501.84	2278.7	223.141	2950.34	2871.95	78.396	2085.85	2135.78	-49.93	2081.16	2146.51	-65.354	2695.1	2625.65	69.448	2874.51	2714.72	159.79	3333.05	2744.86	588.189	2431.42	2352.42	78.995	2340.38	2237.17	103.204	2410.63	2323.05	87.581	2667.92	2522.34	145.579	2357.51	2317.7	39.803	3350.56	2807.73	542.83	2421.86	2259.71	162.148	2207.01	2313.72	-106.713	2704.89	2615.95
2379.8	2289.01	90.793	2471.24	2252.3	218.934	2965.79	2856.42	109.363	2106.95	2142.84	-35.889	2086.47	2153.6	-67.126	2663.83	2641.07	22.768	2931.18	2712.36	218.816	3105.07	2754.89	350.183	2437.27	2361.51	75.763	2390.37	2247.45	142.92	2465.18	2349.43	115.751	2669.87	2544.18	125.694	2393.23	2326	67.229	3320.77	2785.82	534.959	2376.14	2224.65	151.496	2190.58	2294.51	-103.931	2672.98	2593.57
2369.06	2272.1	96.955	2437.92	2239.21	198.711	2915.79	2815.74	100.054	2091.55	2138.43	-46.886	2076.87	2147.2	-70.326	2637.63	2626.31	11.316	2913.87	2693.59	220.278	3213.22	2736.16	477.06	2415.66	2354.32	61.339	2304.77	2233.89	70.88	2439.72	2340.86	98.855	2636.17	2528.6	107.562	2349.21	2325.11	24.098	3269.48	2781.56	487.92	2407.19	2216.7	190.493	2184.66	2288.64	-103.989	2666.83	2598.97
2351.32	2260.34	90.985	2418.81	2230.79	188.018	2939.21	2822.09	117.12	2104.63	2138.89	-34.257	2063.78	2142.15	-78.374	2614.22	2616.26	-2.039	2907.18	2686.24	220.934	3219.05	2729.25	489.801	2380.15	2348.62	31.533	2320.26	2221.43	98.834	2437.82	2338.72	99.104	2640.7	2522.41	118.288	2318.38	2319.69	-1.312	3197.43	2768.71	428.718	2413.3	2213.24	200.052	2180.24	2280.43	-100.197	2644.39	2593.09
2314.11	2267.55	46.556	2386.48	2222.21	164.269	2915.24	2815.64	99.598	2090.67	2133.71	-43.044	2065.4	2137.48	-72.083	2615.86	2608.22	7.64	2863	2671.35	191.653	3053.18	2712.24	340.945	2382.84	2336.5	46.342	2341	2215.75	125.251	2431.1	2332.42	98.674	2583.08	2509.66	73.426	2329.46	2307.04	22.414	3165.66	2747.57	418.096	2409.56	2202.6	206.957	2162.6	2269.8	-107.206	2631.31	2580.29
2311.37	2245.92	65.45	2362.46	2201.46	160.997	2893.58	2796.05	97.537	2061.65	2120.24	-58.588	2050.12	2121.12	-70.997	2583.29	2582.68	0.605	2847.6	2633.89	213.707	3039.21	2685.24	353.963	2353.56	2325.42	28.137	2300.6	2198.17	102.431	2413.56	2326.25	87.313	2569.53	2493.73	75.794	2274.89	2290.21	-15.313	3148.59	2743.41	405.177	2298.12	2197.32	100.805	2136.1	2269.62	-133.528	2627.56	2574.28
2316.15	2246.49	69.655	2344.28	2217.36	126.921	2897.29	2791.02	106.274	2056.57	2100.85	-44.278	2043.65	2116.96	-73.308	2542.79	2563.9	-21.107	2797.91	2627	170.909	3013.59	2666.5	347.087	2347.15	2304.46	42.688	2277.95	2182.51	95.44	2399.77	2318.95	80.828	2558.01	2482.69	75.319	2273.91	2280.52	-6.609	3040.32	2736.58	303.734	2259.39	2183.54	75.858	2174.03	2257.68	-83.651	2616.44	2563.96
2318.98	2236.68	82.296	2311.32	2203.94	107.385	2859.03	2783.3	75.739	2039.59	2092.08	-52.486	2034.74	2103.61	-68.874	2524.94	2546.79	-21.846	2771.2	2607.92	163.284	2959.41	2639.15	320.26	2323.25	2291.79	31.46	2245.16	2170.87	74.288	2384.93	2307.77	77.165	2525.96	2463.93	62.036	2244.28	2263.85	-19.57	3040.85	2715.46	325.39	2247.88	2178.63	69.254	2143.75	2248.02	-104.265	2585.78	2542.33
2340.09	2221.04	119.051	2280.62	2190.16	90.464	2853.76	2775.06	78.696	2023.88	2081.7	-57.818	2018.41	2099.13	-80.713	2491	2532.38	-41.385	2732.84	2582.68	150.158	2948.05	2625.59	322.452	2326.58	2280.27	46.313	2209.92	2158.03	51.891	2349.16	2306.13	43.027	2501.65	2452.9	48.751	2231.88	2260.68	-28.808	2973.86	2694.76	279.108	2232.06	2159.46	72.598	2136.55	2226.67	-90.121	2574.74	2530.98
2311.3	2227.86	83.431	2292.64	2203.26	89.386	2871.76	2782.55	89.202	2032.87	2082.45	-49.577	2016.58	2081.92	-65.339	2496.44	2517.61	-21.174	2727.9	2571.3	156.593	2933.12	2612.15	320.969	2326.31	2272.12	54.19	2220.91	2151.16	69.754	2324.64	2281.17	43.463	2479.08	2421.86	57.219	2222.52	2238.47	-15.944	2967.06	2698.37	268.686	2236.17	2162.12	74.049	2110.1	2228.11	-118.006	2573.72	2531.76
2309.75	2230.43	79.319	2275.24	2204.83	70.412	2894.4	2789.66	104.74	2018.4	2055.41	-37.013	1981.37	2057.54	-76.166	2471.67	2493.35	-21.684	2687.52	2538.35	149.166	2929.63	2584.78	344.848	2316.54	2240.49	76.043	2196.59	2123.4	73.19	2313.28	2256.24	57.047	2464.37	2398.63	65.744	2182.37	2216.95	-34.572	2964.45	2701.92	262.532	2128.09	2153.74	-25.648	2116.05	2238.95	-122.893	2578.85	2537.97
2276.89	2238.33	38.553	2284.8	2208.99	75.807	2885.03	2795.66	89.361	1984.66	2028.79	-44.127	1982.26	2037.24	-54.983	2448.11	2462.36	-14.247	2670.53	2509.92	160.609	2987.91	2563.49	424.425	2310.5	2221.58	88.918	2187.24	2119.61	67.634	2317.02	2246.23	70.787	2444.24	2380.17	64.07	2208.27	2200.41	7.864	2946.33	2710.71	235.62	2143.17	2158.99	-15.814	2141.14	2234.12	-92.982	2593.67	2537.57
2282.68	2226.39	56.293	2278.61	2201.47	77.137	2897.38	2780.99	116.396	1957.46	2008.74	-51.277	1960.86	2027.02	-66.159	2435.04	2450.46	-15.415	2679.22	2498.8	180.415	3012.51	2539.01	473.507	2310.26	2203.87	106.383	2165.99	2093.22	72.772	2278.87	2234.76	44.113	2433.41	2370.76	62.641	2225	2190.28	34.723	2960.56	2712.97	247.589	2168.53	2169.66	-1.139	2136.46	2239.9	-103.44	2593.19	2535.49
2293.52	2217.24	76.281	2286.3	2186.64	99.663	2843.76	2758.68	85.081	1963.71	2008.29	-44.577	1946.86	2018.51	-71.654	2412.01	2426.37	-14.362	2648.73	2490.05	158.678	2951.96	2525.61	426.348	2334.06	2193.24	140.822	2155.24	2079.85	75.39	2258.43	2213.74	44.683	2424.63	2356.88	67.75	2219	2181.28	37.721	2942.51	2703.95	238.567	2212.26	2166.53	45.732	2150.54	2235.22	-84.676	2570.15	2514.86
2286.85	2202.17	84.679	2278	2171.01	106.984	2834.23	2730.22	104.007	1977.67	2001.97	-24.302	1949	2010.64	-61.637	2395.95	2424.65	-28.704	2582.74	2480.28	102.455	3000.04	2526.91	473.128	2332.92	2182.48	150.442	2114.94	2076.83	38.112	2241.25	2213.9	27.352	2419.57	2354.31	65.266	2256.65	2173.89	82.76	2918	2681.46	236.54	2168.05	2152.51	15.541	2124.06	2211.86	-87.805	2565.6	2505.83
2315.16	2183.74	131.418	2301.84	2160.26	141.585	2832.73	2731	101.732	1957.01	2004.35	-47.339	1946.08	2009.87	-63.794	2422.96	2441.4	-18.434	2665.69	2498.27	167.422	3019.59	2536.32	483.268	2310.38	2195.77	114.612	2143.38	2083.78	59.596	2228.88	2208.88	20.001	2442.73	2365.38	77.349	2257.61	2182.29	75.323	2895.99	2665.68	230.31	2239.25	2145.01	94.237	2114.45	2207.68	-93.231	2560.96	2504.63
2362.44	2200.99	161.454	2326.34	2164.99	161.356	2792.29	2731.46	60.83	1978.71	2009.74	-31.023	1952.58	2021.74	-69.161	2440.93	2455.27	-14.344	2654.11	2517.05	137.059	3065.79	2557.12	508.674	2305.41	2204.43	100.977	2107.03	2086.62	20.407	2245.88	2222.39	23.481	2455.3	2379.04	76.266	2301.2	2187.5	113.709	2873.76	2676.82	196.935	2124.66	2138.9	-14.241	2105.47	2210.29	-104.825	2561.25	2507.58
2401.12	2205.4	195.72	2363.5	2171.82	191.672	2837.87	2753.81	84.062	1982.94	2019.73	-36.785	1966.68	2030.31	-63.63	2438.8	2466.06	-27.269	2644.63	2523.1	121.526	3078.8	2568.41	510.388	2374.52	2217.88	156.641	2139.74	2099.07	40.669	2221.66	2215.02	6.648	2451.04	2376.59	74.449	2299.87	2183.73	116.141	2877.81	2704.8	173.008	2291.38	2152.66	138.723	2140.71	2220.03	-79.323	2590.84	2522.06
2412.83	2222.23	190.597	2429.49	2180.41	249.084	2850.5	2774.05	76.444	1983.49	2007.97	-24.484	1946.77	2019.46	-72.692	2427.82	2452.16	-24.342	2640.39	2507.18	133.205	3069.11	2550.7	518.416	2390.85	2205.37	185.476	2108.72	2093.37	15.352	2218.72	2208.21	10.507	2440.98	2356.17	84.809	2224.96	2175.15	49.807	2897.08	2738.17	158.912	2365.68	2178.61	187.075	2140.64	2249.26	-108.618	2621.13	2557.39
2430.44	2251.74	178.703	2448.41	2207.88	240.536	2866.8	2797.97	68.833	1967.63	2008.2	-40.565	1954.92	2017.4	-62.478	2408.22	2441.37	-33.155	2613.65	2497.27	116.381	2909.34	2541.72	367.615	2423.97	2202.19	221.78	2088.09	2090.59	-2.501	2172.62	2208.6	-35.976	2430.42	2357.99	72.434	2259.67	2171.81	87.865	2903.86	2758.55	145.306	2305.82	2198.35	107.465	2186.92	2263.46	-76.541	2633.26	2581.89
2457.47	2256.41	201.057	2504.2	2208.94	295.255	2879.14	2813.18	65.955	1950.05	2005.58	-55.526	1941.43	2013.78	-72.344	2410.99	2432.93	-21.945	2573.76	2497.06	76.702	2797.63	2533.12	264.513	2438.87	2189.36	249.512	2082.71	2079	3.705	2192.23	2201.8	-9.573	2449.51	2358.49	91.02	2279.53	2167.68	111.852	2931.16	2777.36	153.797	2460.91	2212.6	248.302	2186.27	2281.57	-95.299	2645.57	2590.88
2441.91	2266.86	175.051	2585.51	2226.97	358.534	2885.99	2829.14	56.849	1964.72	2005.43	-40.716	1945.06	2016.69	-71.632	2432.29	2445.4	-13.113	2630.92	2513.31	117.609	2807.06	2547.5	259.568	2448.48	2202.09	246.393	2073.99	2085.85	-11.862	2198.5	2214.53	-16.027	2474.64	2371.18	103.453	2241.27	2176.4	64.873	2940.88	2794.85	146.026	2494.06	2229.17	264.882	2176.64	2291.55	-114.908	2665.78	2608.86
2419.86	2278.48	141.389	2614.1	2238.68	375.415	2907.21	2842.18	65.035	1967.01	2011.54	-44.53	1969.67	2031.31	-61.638	2451.93	2463.35	-11.414	2645.17	2536.81	108.357	2864.7	2575.23	289.465	2472.61	2218.95	253.664	2076.64	2111.26	-34.625	2220.47	2220.06	0.413	2468.99	2391.48	77.508	2253.88	2189.45	64.427	2928.69	2807.14	121.552	2498.48	2239.86	258.624	2200.44	2302.66	-102.224	2669.54	2616.6
2518.3	2274.27	244.023	2649.63	2240.45	409.179	2890.99	2837.52	53.466	2003.35	2034.47	-31.12	1995.01	2043.7	-48.689	2489.84	2495.65	-5.813	2649.77	2562.63	87.145	2911.31	2598.91	312.405	2495.2	2241.08	254.117	2136.51	2122.5	14.01	2237.83	2245.66	-7.825	2543.89	2416.33	127.56	2175.04	2218.06	-43.018	2943.25	2820.52	122.728	2548.28	2248.24	300.039	2220.96	2313.58	-92.626	2675.42	2623.38
2532.7	2297.27	235.431	2695.03	2252.65	442.383	2916.42	2855.49	60.928	2000.13	2049.9	-49.766	2018.85	2053.94	-35.094	2492.12	2509.12	-16.999	2710.31	2574.72	135.593	2895.03	2611.41	283.619	2411.78	2246.28	165.497	2156.56	2125.92	30.64	2253.19	2244.22	8.964	2547.73	2413.12	134.608	2213.41	2215.91	-2.505	2938.94	2815.21	123.73	2468.98	2245.34	223.641	2217.13	2309.16	-92.03	2679.04	2619.12
2507.54	2279.81	227.722	2693.96	2242.94	451.022	2891.34	2840.88	50.463	1990.37	2048.43	-58.063	2051.44	2059.82	-8.385	2513.47	2517.69	-4.225	2758.93	2593.73	165.204	2901.23	2622.85	278.385	2439.01	2265.88	173.128	2169.19	2138.9	30.285	2246.91	2258.6	-11.694	2574.5	2428.95	145.546	2301.21	2226.16	75.057	2923.28	2815.89	107.383	2378.91	2239.3	139.612	2215.32	2306.08	-90.754	2664.15	2610.47
2442.46	2275.74	166.717	2703.68	2234.24	469.44	2874.38	2835.87	38.513	2021.98	2061.35	-39.374	2051.04	2070.57	-19.535	2518.36	2527.87	-9.51	2762.27	2602.1	160.175	2907.32	2635.71	271.614	2463.6	2268.65	194.947	2248.5	2150.32	98.177	2298.67	2265.99	32.683	2592.33	2447.09	145.234	2244.89	2232.59	12.299	2910.06	2794.79	115.265	2390.26	2235.13	155.13	2202.57	2295.41	-92.836	2658.88	2598.85
2429	2269.87	159.126	2698.25	2226.7	471.55	2874.93	2821.97	52.961	2025.93	2077.5	-51.564	2093.92	2080.43	13.489	2538	2558.14	-20.147	2778.53	2626.36	152.17	2943.43	2655.22	288.208	2523.92	2280.95	242.962	2220.45	2167.34	53.108	2296.79	2271.26	25.534	2618.51	2453.19	165.319	2403.61	2243.63	159.978	2902.69	2771.63	131.061	2472.19	2224.82	247.364	2176.34	2289.87	-113.532	2647.07	2589.86
2499.9	2262.71	237.189	2723.72	2220.8	502.92	2881.85	2824.03	57.826	2043.81	2092.19	-48.376	2129.84	2100.36	29.486	2561.27	2560.1	1.171	2879.67	2641.93	237.74	2959.15	2682.47	276.681	2541.6	2297.22	244.38	2280.09	2180.05	100.036	2357.83	2285.47	72.354	2579.68	2481.04	98.641	2368.41	2259.18	109.23	2879.94	2766.55	113.385	2488.93	2219.95	268.988	2186.83	2282.91	-96.085	2642.59	2582.04
2510.85	2254.28	256.571	2706.92	2217.84	489.084	2844.51	2812.56	31.944	2057.29	2110.49	-53.196	2172.13	2103.53	68.594	2573.34	2591.09	-17.755	2860.25	2653.12	207.134	2961.52	2688.38	273.146	2529.3	2312.89	216.411	2297.52	2190.72	106.8	2412.8	2308.97	103.83	2660.98	2491.69	169.283	2302.03	2276.18	25.845	2867.13	2759.05	108.08	2418.21	2203	215.212	2175.7	2273.23	-97.531	2636.32	2579.31
2475.65	2238.16	237.49	2656.96	2209.09	447.872	2844.51	2790.51	54.003	2062.08	2109.96	-47.881	2196.81	2115.99	80.818	2592.3	2598.88	-6.577	2823.52	2653.67	169.849	2942.95	2698.2	244.755	2544.85	2316.38	228.464	2309.13	2195.78	113.359	2434.37	2319.82	114.549	2671.3	2511.89	159.405	2243.53	2285.5	-41.971	2857.87	2749.7	108.173	2384.93	2197.04	187.889	2158.47	2260.9	-102.438	2635.86	2562.58
2479.59	2244.68	234.9	2671.91	2203.5	468.413	2844.65	2784.76	59.897	2076.16	2112.09	-35.923	2199.84	2125.92	73.913	2589.4	2592.01	-2.612	2946.5	2657.93	288.572	2918.69	2695.97	222.726	2518.61	2322.75	195.852	2341.28	2195.63	145.651	2438.83	2323.81	115.018	2664.97	2504.05	160.914	2263.82	2279.51	-15.683	2847.99	2742.82	105.174	2491.56	2200	291.557	2163.9	2257.24	-93.337	2617.76	2561.48
2475.86	2235.3	240.564	2649.85	2201.02	448.83	2849	2772.11	76.889	2045.42	2100.1	-54.676	2190.78	2111.2	79.587	2559.86	2570.14	-10.288	2940.62	2630.96	309.663	2859.68	2669.42	190.256	2498.71	2301.32	197.384	2356.81	2185.2	171.615	2423.33	2311.84	111.491	2612.56	2479.61	132.949	2301.12	2259.65	41.472	2817.23	2739.12	78.109	2508.3	2192.08	316.221	2179.95	2246.5	-66.544	2610.19	2558.41
2490.08	2227.53	262.55	2611.06	2190.52	420.542	2819.16	2771.76	47.393	2042.7	2090.48	-47.777	2206.86	2114.22	92.643	2566.78	2553.61	13.166	2942.44	2604.88	337.565	2847.39	2654.24	193.156	2490.22	2288.64	201.576	2328.99	2170.05	158.936	2388.97	2292.84	96.135	2605.28	2461.64	143.64	2253.68	2250.54	3.138	2811.43	2736.94	74.493	2427.02	2190.51	236.51	2148.38	2256.92	-108.542	2604.08	2553.84
2438.86	2241.26	197.594	2594.07	2203.51	390.563	2842.94	2775.24	67.694	2030.04	2080.84	-50.804	2172.15	2090.14	82.01	2517.98	2529.34	-11.356	2822.22	2587.64	234.577	2802.54	2632.78	169.756	2437.9	2275.44	162.465	2193.52	2155.15	38.375	2369.92	2271.22	98.703	2579.85	2433.51	146.337	2200.66	2226.03	-25.364	2811.35	2730.09	81.252	2346.11	2193.56	152.544	2162.13	2247.95	-85.818	2603.41	2544.83
2429.78	2240.24	189.54	2578.32	2209.34	368.98	2823.2	2780.42	42.781	2022.11	2073.43	-51.318	2219.92	2081.75	138.166	2497.59	2523.44	-25.844	2909.13	2583.16	325.968	2798.13	2627.62	170.506	2409.07	2269.88	139.192	2289.54	2146.21	143.336	2401.28	2267.91	133.377	2561.89	2423.66	138.239	2216.56	2219.72	-3.16	2809.91	2746.02	63.887	2302.97	2197.63	105.338	2171.71	2258.28	-86.567	2618.82	2565.78
2442.66	2237.03	205.634	2606.51	2200.23	406.28	2799.77	2778.45	21.328	2034.24	2064.86	-30.625	2165.74	2075.84	89.897	2527.27	2523.77	3.497	2824.79	2585.08	239.706	2771.09	2623.69	147.402	2417.15	2274.9	142.249	2342.19	2152.1	190.096	2419.9	2253.68	166.224	2560.38	2408.28	152.1	2248.9	2205.32	43.587	2825.07	2744.09	80.985	2318.89	2194.8	124.094	2170.62	2252.61	-81.998	2614.45	2565.73
2409.95	2245.71	164.239	2561.09	2207.34	353.753	2827.39	2783.68	43.711	2026.02	2062.77	-36.749	2176.42	2077.6	98.819	2533.64	2527.7	5.942	2999.53	2586.96	412.574	2776	2634.68	141.325	2427.41	2274.43	152.989	2167.6	2154.57	13.028	2441.29	2245.39	195.895	2573.35	2412.06	161.291	2214.48	2202.3	12.178	2833.85	2757.23	76.614	2317.97	2207.43	110.542	2209.82	2266.55	-56.738	2637	2574.14
2399.34	2232.35	166.995	2532.66	2207.18	325.481	2856.44	2767.27	89.162	2020.41	2057.7	-37.284	2204.17	2066.41	137.761	2528.92	2533.19	-4.271	2956.78	2592.18	364.599	2797.05	2642.95	154.096	2433.68	2276.96	156.722	2326.45	2158.95	167.498	2426.01	2237.94	188.074	2555.01	2420.84	134.169	2203.68	2208.91	-5.229	2838.64	2740.66	97.976	2361.44	2196.72	164.725	2206.45	2256.45	-50.003	2612.76	2545.25
2401.49	2220.23	181.267	2492.3	2199.68	292.619	2831.35	2764.15	67.202	1990.32	2056.14	-65.827	2232.63	2065.13	167.497	2491.37	2512.42	-21.051	2924.42	2577.58	346.838	2779.88	2625.81	154.074	2401.26	2269.75	131.511	2337.63	2152.55	185.078	2434.8	2244.91	189.888	2557.98	2421.72	136.259	2219.44	2208.06	11.376	2821.14	2747.19	73.947	2246.93	2207.27	39.668	2175.82	2268.52	-92.709	2621.84	2559.53
2373.28	2234.27	139.006	2478.21	2200.09	278.118	2834.26	2768.59	65.672	2011.83	2057.49	-45.651	2177.07	2069.78	107.3	2487.17	2524.97	-37.801	2794.97	2598.47	196.501	2765.2	2631.63	133.568	2380.34	2265.19	115.149	2337.41	2152.95	184.464	2407.74	2239.41	168.333	2544.37	2417.68	126.682	2223.7	2199.59	24.11	2818.05	2754.02	64.026	2372.28	2199.61	172.679	2156.69	2256.71	-100.013	2621.01	2570.24
2331.78	2239.66	92.119	2464.32	2199.54	264.781	2832.44	2784.12	48.313	1996.78	2052.83	-56.043	2187.01	2069.6	117.409	2475.91	2515.79	-39.878	2816.47	2581.51	234.963	2766.46	2625.2	141.256	2364.27	2260.38	103.887	2341.71	2151.72	189.99	2378.82	2240.08	138.739	2525.11	2421.08	104.031	2188.8	2200.12	-11.316	2803.64	2740.36	63.286	2303.74	2188.46	115.279	2157.79	2260.17	-102.387	2608.66	2562.73
2324.67	2235.21	89.462	2464.23	2206.41	257.823	2831.73	2765.89	65.84	2001.62	2057.35	-55.733	2209.26	2070.63	138.632	2470.76	2518.57	-47.811	2886.01	2590.39	295.621	2754.07	2625.59	128.479	2355.81	2257.24	98.574	2343.49	2146.72	196.772	2364.05	2243.07	120.973	2530.29	2420.87	109.426	2164.53	2198.39	-33.851	2789.49	2731.7	57.794	2258.63	2181.51	77.126	2158.61	2248.61	-89.993	2623.33	2557.93
2307.65	2220.6	87.045	2428.95	2198.2	230.747	2842.92	2755.93	86.988	1994.14	2053.64	-59.5	2157.47	2061.76	95.708	2473.72	2511.97	-38.25	2924.3	2578.03	346.269	2756.38	2612.64	143.742	2344.86	2256.66	88.195	2332.45	2144.93	187.522	2371.84	2241.85	129.985	2526.17	2427.16	99.013	2186.1	2203.72	-17.62	2786.3	2727.3	59.006	2293.54	2186.05	107.497	2144.42	2248.29	-103.871	2602.8	2546.29
2317.49	2202.9	114.588	2370.62	2180.3	190.322	2805.66	2738.49	67.173	1992.08	2044.57	-52.496	2169.59	2058.95	110.644	2452.82	2518.26	-65.444	2890.29	2572.12	318.168	2759.95	2618.47	141.483	2348.99	2260.49	88.5	2301.08	2142.82	158.26	2351.91	2237.98	113.928	2502.66	2419.74	82.919	2147.1	2193.2	-46.1	2765.34	2715.08	50.266	2259.68	2173.15	86.526	2127.03	2233.44	-106.413	2593.58	2534.01
2317.66	2193	124.66	2357.17	2156.73	200.438	2788.97	2708.37	80.595	1983.31	2044.02	-60.712	2133.04	2051.43	81.611	2437.36	2493.66	-56.295	2878.37	2554.8	323.575	2739.33	2587.11	152.227	2324.34	2235.88	88.46	2284.37	2125.08	159.292	2330.27	2233.45	96.82	2483.9	2400.23	83.666	2130.65	2179.75	-49.104	2745.01	2696.32	48.692	2232.08	2151.28	80.804	2100.87	2216.14	-115.27	2574.5	2518.71
2327.85	2192.71	135.137	2328.32	2163.66	164.661	2785.41	2723.55	61.866	1972.7	2025.67	-52.974	2084.76	2030.43	54.328	2415.65	2476.13	-60.479	2811.5	2540.38	271.116	2727.64	2572.77	154.869	2312.17	2232.95	79.219	2201.86	2120.34	81.517	2306.77	2223.97	82.797	2462.89	2393.95	68.935	2130.33	2176.87	-46.535	2748.05	2702.65	45.402	2221.23	2160.25	60.987	2107.37	2229.35	-121.973	2567.88	2527.93
2338.16	2205.98	132.174	2315.3	2171.35	143.948	2805.71	2731.47	74.242	1967.26	2034.64	-67.383	2086.5	2038.18	48.322	2408.34	2472.95	-64.609	2818.72	2528.47	290.251	2761.74	2568.24	193.497	2296.05	2210.37	85.677	2191.75	2111.51	80.243	2302.3	2222.31	79.989	2457.87	2394.34	63.535	2122.56	2174.62	-52.067	2742.61	2701.73	40.88	2203.53	2148.48	55.052	2111.56	2225.16	-113.606	2567.47	2531.88
2343.87	2217.82	126.056	2307.36	2181.27	126.089	2826.58	2743.83	82.747	1959.47	2022.61	-63.145	2065.22	2029.93	35.285	2387.85	2459.73	-71.881	2798.55	2508.88	289.664	2809.5	2556.73	252.768	2285.63	2211.32	74.307	2183.33	2102.83	80.502	2280.57	2228.39	52.181	2452.79	2379.18	73.61	2118.02	2166.24	-48.219	2746.26	2717.4	28.857	2198.57	2155.09	43.482	2133.15	2235.48	-102.327	2576.05	2534.24
2314.47	2217.92	96.551	2313.21	2197.14	116.068	2862.78	2760.9	101.881	1964.42	2019.56	-55.137	2071.74	2030.86	40.878	2406.28	2464.46	-58.181	2784.65	2512.93	271.719	2937.8	2565.27	372.535	2293.03	2217.57	75.465	2191.04	2099.56	91.482	2283.63	2203.77	79.859	2447.53	2375.91	71.618	2096.83	2158.34	-61.515	2779.24	2725.07	54.164	2202.28	2177.12	25.159	2136.11	2243	-106.896	2601.97	2549.03
2329.93	2211.35	118.576	2280.28	2189.18	91.101	2834.33	2748.9	85.426	1952.44	2008.84	-56.403	2052.28	2021.64	30.641	2412.42	2442.22	-29.8	2736.85	2518.12	218.735	3048.11	2557.7	490.406	2297.59	2206.32	91.269	2194.17	2100.25	93.917	2267.03	2193.01	74.019	2427.08	2355.35	71.733	2107.67	2152.72	-45.047	2778.97	2732.13	46.833	2228.78	2182.78	46.009	2150.32	2242.11	-91.787	2591.68	2543.9
2337.77	2213.09	124.681	2288.11	2183.47	104.637	2835.54	2736.9	98.639	1935.62	2004.96	-69.335	2036.36	2010.74	25.618	2420.88	2451.38	-30.498	2633.19	2518.53	114.651	3170.93	2559.72	611.209	2271.4	2207.33	64.074	2180.95	2094.4	86.549	2249.35	2192.95	56.397	2428.51	2374.44	54.069	2103.26	2143.71	-40.444	2757.79	2703.92	53.872	2168.91	2167.11	1.794	2123.06	2229.66	-106.598	2578.05	2528.45
2364.16	2198.85	165.311	2261.03	2161.22	99.808	2796.94	2708.38	88.558	1959.98	2010.69	-50.715	2039.01	2018.64	20.368	2447.38	2472.65	-25.268	2702.81	2519.62	183.186	3290.88	2561.93	728.947	2271.36	2211.6	59.755	2187.17	2103.05	84.12	2235.91	2204.93	30.983	2444.62	2385.49	59.123	2108.39	2155.8	-47.406	2739.7	2687.51	52.198	2170.54	2149.85	20.694	2119.69	2218.68	-98.992	2562.12	2504.18
2401.32	2181.15	220.167	2242.1	2149.15	92.943	2790.67	2691.78	98.89	1969	2014.02	-45.024	2038.54	2025.62	12.916	2484.8	2484.83	-0.026	2705.79	2545.07	160.721	3481.97	2574.87	907.101	2301.12	2222.88	78.248	2176.14	2102.7	73.442	2261.95	2223.62	38.331	2456.3	2401.69	54.613	2116.35	2172.17	-55.817	2722.79	2669.22	53.571	2136.58	2144.36	-7.776	2111.79	2196.25	-84.463	2541.24	2494.61
2435.01	2170.55	264.467	2231.33	2134.95	96.377	2782.94	2695.45	87.484	1980.32	2030.28	-49.957	2046.03	2041.71	4.321	2497.61	2505.12	-7.515	2765.39	2544.08	221.311	3561.97	2586.08	975.888	2378.09	2228.59	149.495	2165.88	2114.6	51.28	2283.09	2237.92	45.169	2483.09	2427.61	55.48	2135.95	2193.43	-57.476	2707.13	2668.07	39.058	2116.41	2134.56	-18.157	2103.58	2202.32	-98.741	2546.18	2488.02
2465.93	2162.33	303.598	2241.01	2127.01	114	2801.66	2675.44	126.215	1973.17	2038.02	-64.845	2037.81	2040.4	-2.588	2492.97	2515.18	-22.213	2716.79	2556.46	160.333	3723.12	2595.92	1127.2	2390.91	2241.06	149.858	2159.97	2116.66	43.31	2268.69	2231.47	37.222	2475.51	2419.24	56.269	2127.71	2185.51	-57.801	2715.63	2663.59	52.035	2096.16	2129.82	-33.665	2098.35	2192.37	-94.023	2542.67	2488.81
2464.32	2166.62	297.696	2260.99	2141.47	119.521	2777.7	2692.21	85.485	1971.07	2033.77	-62.697	2048.03	2051.81	-3.783	2499.04	2519.13	-20.091	2685.98	2556.66	129.32	3884.5	2590.88	1293.62	2414.5	2242.58	171.921	2161.47	2125.22	36.256	2252.82	2247.97	4.859	2478.37	2423.23	55.137	2140.51	2192.23	-51.722	2707.6	2664.19	43.408	2085.81	2135.23	-49.422	2091.39	2190.1	-98.713	2536.33	2491.66
2533.47	2172.42	361.053	2263.46	2135.94	127.519	2741.1	2680.66	60.441	1987.43	2040.01	-52.578	2031.32	2038.65	-7.336	2481.55	2511.13	-29.583	2728.51	2555.8	172.705	3950.71	2583.69	1367.02	2312.28	2238.43	73.849	2149.83	2122.46	27.373	2242.88	2238.49	4.385	2470.18	2413.75	56.422	2138.85	2183.29	-44.446	2727.93	2675.24	52.695	2121.9	2137.63	-15.731	2091.39	2199.18	-107.79	2548.78	2497.3
2558.95	2174.21	384.736	2288.37	2137.75	150.62	2755.02	2693.78	61.236	1971.94	2037.69	-65.752	2036.95	2039.72	-2.767	2476.95	2505.67	-28.721	2721.27	2558.34	162.931	3948.79	2590.66	1358.13	2390	2234.41	155.592	2129.57	2123.2	6.36	2219.53	2231.32	-11.791	2455.76	2413.97	41.785	2123.58	2191.66	-68.086	2713.45	2670.21	43.239	2157.93	2139.24	18.697	2099.6	2197.67	-98.076	2543.74	2496.02
2579.67	2181.55	398.123	2291.7	2141.23	150.466	2765.93	2700.98	64.954	1965.56	2030.48	-64.917	2009.7	2044.44	-34.743	2483.42	2506.22	-22.796	2675.88	2542.42	133.455	3948.02	2580.21	1367.81	2393.31	2223.18	170.132	2094.23	2108.55	-14.326	2255.57	2234.56	21.012	2458.88	2403.35	55.532	2098.52	2190.08	-91.562	2691.69	2661.68	30.006	2139.77	2135.84	3.936	2076.56	2189.82	-113.269	2537.89	2492.9
2602.39	2184.7	417.686	2319.76	2157.74	162.017	2787.5	2713.75	73.748	1965.58	2026.77	-61.187	2018.74	2046.22	-27.475	2481.99	2496.51	-14.519	2672.67	2541.05	131.624	4012.68	2577.16	1435.53	2355.19	2224.85	130.341	2099.14	2112.49	-13.352	2308.76	2226.63	82.128	2444.95	2398.19	46.756	2100.61	2171.06	-70.456	2716.41	2681.14	35.276	2115.3	2144.84	-29.533	2101.98	2202.26	-100.28	2543.91	2501.4
2589.42	2190.7	398.721	2357.48	2155.39	202.089	2814.76	2709.8	104.961	1963.06	2033.99	-70.933	1996.42	2035.27	-38.84	2510.05	2495.17	14.874	2723.32	2538.94	184.376	3836.73	2576.47	1260.26	2395.67	2227.23	168.436	2132.44	2108.52	23.924	2339.03	2219.4	119.626	2441.52	2390.34	51.174	2121.31	2167.26	-45.945	2740.07	2688.15	51.92	2157.28	2149.92	7.365	2123.62	2223.39	-99.773	2567.99	2513.98
2463.17	2186.6	276.57	2364.78	2162.93	201.852	2811.03	2718.38	92.649	1952.98	2021.34	-68.36	2011.16	2026.59	-15.436	2504.3	2491.45	12.854	2682.46	2537.41	145.052	4128.44	2579.2	1549.24	2367.43	2223.69	143.742	2136.32	2107.46	28.859	2364.79	2195.77	169.018	2426.83	2379.2	47.631	2101.07	2157.58	-56.512	2724.29	2681.31	42.984	2134.43	2137.42	-2.994	2186.44	2196.56	-10.123	2549.93	2490.67
2603.69	2183.18	420.506	2409.87	2149.19	260.683	2797.78	2702.17	95.612	1945.74	2021.75	-76.012	2007.58	2032.86	-25.279	2503.41	2489.66	13.755	2672.37	2540.45	131.918	4097.4	2579.51	1517.89	2304.01	2233.1	70.915	2115.01	2104.57	10.443	2357.51	2197.56	159.947	2428.84	2378.33	50.505	2106.92	2160.47	-53.546	2723.86	2683.6	40.261	2244.74	2148.36	96.381	2176.98	2206.15	-29.169	2556.79	2496.26
2599.99	2174.58	425.418	2415.92	2149.31	266.606	2787.34	2693.85	93.496	1949.28	2018.97	-69.691	2027.44	2029.38	-1.94	2520.46	2490.12	30.337	2696.78	2532	164.782	3947.5	2573.12	1374.38	2333.31	2224.13	109.177	2147.5	2110.81	36.689	2392.23	2200.98	191.248	2427.99	2384	43.987	2102.73	2156.52	-53.794	2710.17	2661.06	49.109	2227.78	2139.48	88.305	2133.3	2197.32	-64.024	2540.5	2486.23
2454.43	2155.39	299.036	2411.06	2134.07	276.988	2775.09	2688.13	86.957	1950.4	2019.6	-69.194	2048.07	2032.89	15.179	2526.79	2487.34	39.451	2713.64	2546.91	166.735	4015.72	2586.57	1429.15	2356.21	2228.97	127.238	2137.84	2110.27	27.566	2449.62	2199.6	250.028	2437.59	2387.78	49.811	2104.47	2153.11	-48.64	2706.05	2656.86	49.193	2239.01	2133.87	105.136	2102.45	2189.86	-87.415	2525.8	2470.83
2563.68	2157.54	406.135	2405.23	2125.68	279.545	2767.82	2662.2	105.618	1982.35	2028.61	-46.259	2061.01	2034.87	26.136	2516.66	2500.1	16.56	2638.78	2550.93	87.845	4008.43	2593.93	1414.5	2359.11	2231.21	127.901	2129.57	2106.39	23.18	2473.15	2204.87	268.282	2438.73	2398.22	40.515	2096.57	2154.07	-57.495	2690.84	2645.34	45.502	2139.2	2122.07	17.122	2082.4	2182	-99.594	2503.89	2465.37
2529.99	2146.17	383.815	2411.05	2122.23	288.82	2743.03	2668.16	74.865	1973	2021.39	-48.393	2059.7	2032.29	27.402	2511.48	2500.7	10.777	2624.87	2544.85	80.018	4166.69	2583.44	1583.25	2369.23	2225.24	143.985	2144.42	2110.94	33.474	2486.6	2214.97	271.636	2448.98	2393.39	55.591	2088.64	2153.84	-65.199	2673.07	2632.18	40.885	2196.37	2113.59	82.78	2074.86	2168.2	-93.341	2517.38	2452.61
2515.1	2148.96	366.143	2417.28	2116.97	300.313	2743.62	2654.85	88.777	1989.54	2025.45	-35.913	2080.21	2035.12	45.094	2506.64	2489.4	17.248	2671.64	2538.76	132.875	3952.69	2581.49	1371.2	2372.03	2224.52	147.511	2145.88	2110.69	35.188	2505.29	2209	296.293	2448.9	2382.65	66.254	2256.45	2143.32	113.125	2650.54	2623.26	27.278	2250.11	2105.58	144.525	2094.7	2164.56	-69.855	2517.15	2442.62
2524.68	2135.97	388.712	2404.5	2112.51	291.988	2741.14	2648.18	92.959	1986.75	2019.2	-32.449	2103.52	2028.32	75.2	2483.99	2485.61	-1.615	2656.68	2529.35	127.326	3902.72	2560.75	1341.97	2351.34	2220.4	130.936	2154.67	2105.34	49.336	2500.55	2196.65	303.9	2430.45	2386.24	44.205	2120.18	2137.08	-16.893	2678.2	2609.25	68.946	2187.44	2109.07	78.369	2093.8	2156.14	-62.344	2516.23	2433.58
2522	2130.2	391.794	2388.28	2105.24	283.044	2725.72	2645.64	80.074	2005.32	2007.14	-1.819	2073.91	2022.24	51.673	2498.93	2483.22	15.707	2618.83	2520.3	98.538	3794.5	2560.27	1234.24	2321.35	2208.18	113.172	2196.52	2097.14	99.379	2506.05	2200.72	305.33	2426.39	2377.42	48.97	2088.3	2134.11	-45.819	2655.11	2615.22	39.883	2147.6	2089.18	58.423	2059.43	2154.83	-95.402	2491.89	2451.16
2504.93	2128.52	376.402	2392.2	2115.59	276.603	2727.65	2655.53	72.124	1985.7	2005.25	-19.544	2076.22	2015.88	60.344	2484.27	2466.48	17.789	2599.81	2506.38	93.425	3924.91	2550.56	1374.36	2309.47	2207.36	102.11	2203.8	2081.69	122.118	2489.25	2196.47	292.781	2420.53	2375.11	45.422	2060.76	2116.28	-55.519	2660.82	2616.85	43.975	2218.76	2100.84	117.915	2062.61	2166.28	-103.672	2501.07	2438.54
2495.27	2134.51	360.764	2375.64	2115.65	259.988	2720.16	2651.03	69.126	1998.46	2002.52	-4.061	2014.59	2005.03	9.555	2465.83	2448.46	17.375	2594.52	2493.26	101.264	3712.74	2533.81	1178.93	2291.36	2198.49	92.869	2197.65	2082.34	115.307	2451.32	2180.06	271.257	2407.71	2346.64	61.067	2030.69	2096.76	-66.064	2667.55	2620.23	47.322	2179.62	2092.9	86.717	2052.46	2156.83	-104.368	2488.45	2433.46
2473.38	2139.57	333.811	2365.65	2124.64	241.006	2749.86	2667.97	81.893	2003.74	1984.5	19.237	2064.55	1995.55	69.004	2457.2	2442.29	14.913	2592.11	2482.53	109.579	3506.51	2519.12	987.393	2278.95	2185.84	93.104	2182	2070.1	111.898	2430.57	2170.77	259.799	2376.49	2334.3	42.188	2045.7	2084.01	-38.308	2664.3	2625.7	38.604	2242.1	2099.16	142.947	2055.56	2162.86	-107.303	2514.24	2444.2
2405.16	2151.11	254.044	2368.33	2131.08	237.247	2773.09	2672.34	100.746	2026.83	1967.72	59.105	2079.84	1986.68	93.156	2410.86	2423.55	-12.684	2575.14	2465.55	109.592	3746.1	2501.8	1244.29	2277.62	2176.59	101.023	2185.32	2053.09	132.229	2418.98	2158.7	260.271	2381.76	2327.59	54.167	2126.68	2074.07	52.619	2692.56	2638.87	53.684	2217.83	2112.99	104.84	2073.53	2178.39	-104.854	2537.18	2451.94
2415.08	2146.9	268.18	2362.69	2135.11	227.589	2764.93	2678.07	86.852	2019.89	1964.29	55.602	2132.76	1962.56	170.191	2407.11	2412.49	-5.387	2565.41	2452.12	113.29	3509.3	2492.42	1016.87	2250.14	2170.46	79.679	2205.12	2049.62	155.505	2406.49	2143.14	263.342	2376.02	2310.95	65.074	2085.49	2061.92	23.57	2693.95	2642.55	51.401	2165.76	2115.14	50.625	2066.64	2180.41	-113.778	2529.72	2449.39
2369.68	2139.96	229.721	2349.01	2124.26	224.744	2764.93	2670.85	94.076	1992	1961.43	30.566	2101.06	1964.48	136.587	2417.89	2407.01	10.87	2557.15	2453.69	103.465	3445.91	2496.91	948.997	2199.66	2175.36	24.308	2190.66	2048.46	142.194	2384.1	2145.67	238.432	2363.95	2307.07	56.881	2071.97	2065.79	6.175	2686.14	2632.91	53.234	2180.72	2106.25	74.474	2098.16	2174.81	-76.643	2513.58	2445.64
2341.65	2123.21	218.443	2315.89	2112.3	203.59	2736.72	2643.23	93.483	2027.95	1957.94	70.016	2047.11	1960.81	86.3	2396.84	2408.59	-11.748	2557.12	2448.39	108.725	3536.3	2491.83	1044.47	2211.07	2162.82	48.246	2188.84	2038.89	149.953	2180.93	2142.53	38.409	2373.02	2308.11	64.913	2116.44	2068.48	47.96	2667.4	2607.41	59.987	2196.58	2095.57	101.007	2066.9	2157.06	-90.162	2484.31	2427.9
2353.22	2115.85	237.367	2290.93	2103.22	187.713	2714.44	2629.12	85.323	2030.11	1957.27	72.837	2036.1	1965.26	70.838	2392.86	2418.38	-25.514	2603.67	2452.5	151.172	3520.73	2490.67	1030.05	2227.15	2174.74	52.405	2197.6	2043.86	153.746	2286.24	2143.38	142.856	2385.46	2314.69	70.769	2106.97	2066.99	39.98	2642.91	2593.91	49.009	2149.69	2082.09	67.6	2071.04	2130.34	-59.297	2483.91	2409.83
2341.74	2101.46	240.283	2256.68	2093.69	162.988	2710.44	2625.12	85.319	2031.23	1965.68	65.548	2089	1958.22	130.773	2412.27	2414.37	-2.099	2589.11	2465.94	123.169	3311.24	2492.21	819.033	2218.18	2178.27	39.904	2191.66	2046.11	145.544	2347.54	2140.39	207.147	2391.15	2318.33	72.822	2059.06	2068.01	-8.948	2641.91	2581.38	60.534	2153.7	2072.66	81.048	2073.05	2122.15	-49.102	2466.46	2402.72
2328.28	2110.42	217.859	2265.77	2102.99	162.779	2729.38	2631.43	97.947	2053.45	1982.54	70.912	2098.82	1975.84	122.987	2445.92	2430.64	15.285	2614.32	2477.78	136.532	3106.2	2513.96	592.24	2250.13	2189.84	60.289	2200.15	2063.01	137.142	2332.04	2162.12	169.92	2419.91	2341.31	78.602	2090.54	2081.64	8.902	2636.74	2584.56	52.178	2165.94	2069.74	96.196	2057.97	2122.31	-64.34	2487.28	2401.35
2292.46	2116.54	175.92	2245.2	2105.37	139.822	2730.76	2640.2	90.555	2060.16	1996.64	63.518	2122.79	2000.49	122.297	2498.35	2463.38	34.969	2627.05	2500.77	126.277	3369.77	2546.32	823.445	2261.51	2212.44	49.066	2153.62	2084.61	69.01	2338.76	2166.6	172.158	2431.72	2354.88	76.842	2069.22	2105.69	-36.47	2623.14	2578.76	44.373	2108.35	2073.8	34.546	2047.62	2123.14	-75.515	2488.86	2410.12
2297.35	2123.27	174.081	2250.43	2108.48	141.948	2722.88	2645.9	76.979	2054.3	1994.46	59.835	2071.16	1995.34	75.817	2416.35	2460.28	-43.935	2595.52	2500.29	95.228	3339.17	2537.15	802.021	2246.36	2214.48	31.882	2220.3	2078.71	141.588	2318.44	2168.88	149.554	2410	2357.07	52.921	2068.82	2099.47	-30.653	2671.69	2613.03	58.655	2132.14	2085.26	46.878	2073.29	2144.91	-71.621	2496.07	2428.72
2260.39	2105.96	154.429	2234.01	2097.41	136.598	2713.8	2628.43	85.374	2028.23	1985.48	42.753	2102.19	1984.11	118.074	2432.01	2440.29	-8.279	2575.99	2477.99	98.006	3232.9	2517.39	715.503	2225.91	2202.44	23.47	2175.72	2065.83	109.891	2288.66	2165.7	122.956	2403.32	2339.54	63.78	2040.43	2093.89	-53.458	2654.51	2603.27	51.242	2111.98	2089.09	22.889	2127.92	2133.3	-5.384	2498.09	2424.82
2255.45	2108.62	146.825	2206.39	2098.96	107.432	2682.19	2633.85	48.34	2004.25	1984.22	20.023	2072.89	1984.57	88.322	2404.92	2423.51	-18.59	2572.44	2479.54	92.902	3070.72	2513.64	557.073	2204.38	2190.55	13.828	2157.95	2062.51	95.442	2264.4	2164.18	100.222	2391.8	2337.57	54.233	2066.27	2080.67	-14.396	2645.7	2606.93	38.772	2055.88	2088.91	-33.025	2132.17	2138.61	-6.442	2483.65	2421.52
2255.95	2112.19	143.753	2180.45	2099.48	80.972	2665.93	2629.68	36.25	1989.64	1982.77	6.87	2054.99	1982.42	72.564	2396.72	2424.04	-27.327	2574.25	2458.09	116.164	3089.78	2499.95	589.83	2195.73	2175.42	20.306	2111.17	2059.57	51.601	2234.93	2156.04	78.893	2373.48	2331.01	42.473	2024.95	2072.6	-47.647	2619.6	2594.68	24.922	2113.02	2081.12	31.9	2149.27	2126.66	22.61	2472.71	2419.33
2234.93	2101.78	133.152	2157.3	2083.33	73.974	2652.69	2619.78	32.913	1979.01	1968.97	10.035	2029.67	1965.47	64.198	2376.01	2401.29	-25.281	2525.29	2436.41	88.877	2989.28	2477.64	511.636	2176.87	2167.66	9.217	2104.97	2034.84	70.134	2215.47	2151.68	63.784	2359.01	2320.41	38.6	2044.42	2067.51	-23.096	2609.27	2595.98	13.295	2099.32	2079.04	20.286	2128.11	2121.86	6.25	2459.05	2416.93
2217.6	2119.67	97.926	2166.96	2098.12	68.842	2673.81	2644.13	29.679	1973.81	1967.69	6.117	2013.74	1969.19	44.555	2365.21	2407.06	-41.846	2526.7	2431.11	95.594	2934.6	2473.13	461.468	2162.47	2159.97	2.499	2086.33	2031.75	54.577	2207.94	2159.81	48.129	2362.73	2318.52	44.206	2043.58	2066.69	-23.105	2617.15	2585.63	31.527	2083.73	2071.51	12.212	2178.97	2126.29	52.687	2462.73	2415.84
2220.29	2115.08	105.212	2164.64	2097.19	67.447	2692.78	2638.7	54.08	1941.59	1958.09	-16.495	2002.44	1955.48	46.958	2374.44	2382.63	-8.189	2526.65	2413.89	112.764	2922.47	2460.71	461.758	2159.49	2156	3.489	2070.47	2025.8	44.667	2194.96	2140.24	54.717	2343.63	2297.5	46.125	2006.74	2039.51	-32.764	2620.78	2593.7	27.081	2095.59	2072.42	23.172	2123.55	2123.62	-0.069	2475.96	2414.99
2186.12	2111.05	75.076	2158.06	2095.23	62.826	2687.5	2630.76	56.737	1924.72	1937.31	-12.583	2001.14	1932.87	68.277	2361.92	2375.89	-13.965	2510.41	2404.32	106.088	2940.93	2446.99	493.94	2167.11	2143.53	23.585	2060.99	2010.49	50.499	2173.54	2135.95	37.595	2346.5	2288.4	58.108	1992.89	2039.83	-46.947	2615.86	2591.75	24.113	2084.87	2075.64	9.232	2092.3	2121	-28.697	2475.05	2415.52
2183.78	2108.61	75.177	2151.41	2091.62	59.793	2667.78	2621.68	46.1	1925.19	1929.41	-4.22	1976.57	1926.14	50.43	2362.92	2361.31	1.613	2522.35	2394.3	128.058	2849.45	2441.68	407.763	2152.37	2135.03	17.342	2056.14	2004.37	51.764	2163.09	2114.8	48.283	2326.88	2276.82	50.062	1956.75	2018.13	-61.375	2606.3	2586.18	20.116	2096.18	2063.98	32.196	2020.47	2115.14	-94.67	2472.02	2394.13
2153.28	2096.89	56.399	2145.64	2083.48	62.161	2662.15	2603.08	59.067	1909.62	1924.72	-15.097	1947.74	1916.87	30.869	2352.64	2348.42	4.22	2503.9	2388.42	115.475	2838.68	2428.8	409.881	2137.98	2121.34	16.639	2044.47	1993.26	51.21	2140.39	2106.35	34.036	2321.1	2269.33	51.777	1946.85	2005.36	-58.514	2589.24	2565.97	23.272	2065.1	2057.45	7.654	1980.26	2093.38	-113.115	2457.35	2383.32
2133.04	2070.77	62.27	2132.66	2067.07	65.582	2641.93	2575.65	66.272	1890	1901.35	-11.351	1936.33	1907.59	28.739	2344.14	2345.28	-1.141	2491.66	2370.77	120.896	2807.18	2421.52	385.655	2130.13	2111.02	19.111	2035.54	1982.67	52.878	2124.84	2100.57	24.27	2317.74	2258.77	58.97	1950.4	1997.39	-46.985	2574.55	2545.37	29.178	2013	2044.12	-31.118	1992.37	2086.84	-94.47	2432.87	2362.51
2138.68	2054.3	84.385	2137.63	2053.46	84.176	2641.09	2554.52	86.574	1893.76	1910.83	-17.063	1913.2	1912.49	0.704	2361.58	2339.07	22.514	2465.6	2377.78	87.818	2719.67	2421.23	298.435	2133.81	2111.35	22.465	2036.61	1991.36	45.25	2115.9	2096.92	18.987	2321.08	2260.87	60.211	1945.29	1997.5	-52.21	2560.13	2524.38	35.754	2021.33	2024.71	-3.377	1949.98	2063.63	-113.649	2410.97	2341.39
2119.06	2044.85	74.211	2144.6	2041.49	103.107	2631.37	2555.49	75.878	1888.69	1913.1	-24.402	1922.75	1920.49	2.26	2358.17	2345.76	12.415	2500.23	2378.66	121.571	2710	2421.55	288.445	2137.77	2116.47	21.304	2003.06	1981.45	21.608	2104.91	2093.69	11.219	2314.89	2259.69	55.198	1950.67	1998.48	-47.81	2550.03	2512.27	37.763	2010.13	2013.19	-3.057	1952.53	2054.86	-102.332	2395.86	2327.23
2124.03	2034	90.029	2148.91	2021.63	127.284	2613.7	2532.17	81.526	1884.96	1912.91	-27.949	1909.86	1915.67	-5.806	2357.09	2349.49	7.606	2502.03	2389.95	112.081	2697.02	2421.06	275.965	2138.88	2111.2	27.683	1997.85	1986.43	11.412	2108.4	2091.82	16.576	2315.97	2258.7	57.273	1934.23	1997.04	-62.806	2531.78	2486.9	44.873	1967.63	1997.51	-29.878	1929.17	2036.15	-106.98	2379.22	2312.1
2169.05	2033.43	135.611	2192.59	2022.06	170.524	2609.88	2525.49	84.381	1886.53	1922.31	-35.779	1917.53	1921.74	-4.209	2368.22	2355.33	12.892	2482.95	2393.31	89.632	2689.71	2430.49	259.222	2145.57	2125.28	20.289	2008.98	1997.19	11.798	2123.67	2099.76	23.917	2320.05	2258.68	61.367	1953.88	2002.66	-48.783	2538.55	2496.2	42.35	2007.54	2004.1	3.442	1935.07	2036.49	-101.424	2388.08	2316.69
2161.03	2020.66	140.372	2218.34	2023.6	194.731	2593.65	2527.69	65.96	1871.59	1916.13	-44.545	1906.76	1913.92	-7.159	2348.6	2346.96	1.637	2465.32	2379.35	85.968	2634.3	2421.43	212.876	2131.4	2117.13	14.265	1971.44	1990.3	-18.861	2116.04	2098.32	17.724	2309.95	2263.42	46.53	1930.12	1996.26	-66.146	2525.84	2494.03	31.806	1981.95	2006.72	-24.773	1953.91	2037.07	-83.164	2389.58	2316.78
2180.01	2043.67	136.335	2228.38	2033.73	194.654	2614.98	2545.45	69.529	1862.95	1909.91	-46.951	1893.88	1911.1	-17.22	2325.06	2324.91	0.151	2425.3	2371.16	54.142	2627.45	2413.52	213.929	2123.02	2109.7	13.317	1951.15	1978.21	-27.057	2149.15	2089.94	59.216	2301.85	2253.24	48.614	1934.66	1998.71	-64.046	2540.04	2510.28	29.76	1981.54	2011.25	-29.712	1980.64	2043.65	-63.01	2400.7	2336.06
2199.53	2069.59	129.941	2283.74	2055.17	228.573	2644	2576.51	67.487	1866.15	1905.88	-39.728	1903.81	1907.46	-3.652	2341.79	2335.28	6.509	2436.6	2375.88	60.72	2574.14	2409.11	165.033	2128.53	2110.88	17.654	1979.45	1978.09	1.36	2192.47	2099.78	92.688	2319.39	2263.53	55.855	1943.03	1995.24	-52.21	2578.26	2541.07	37.192	2006.89	2029.31	-22.423	2024.38	2071.39	-47.002	2420.82	2366.32
2215.02	2089.46	125.565	2361.23	2068.23	292.997	2691.21	2591.39	99.817	1855.38	1908.33	-52.949	1897.18	1903.92	-6.746	2347.73	2318.47	29.26	2454.25	2377.37	76.879	2546.11	2399.33	146.781	2121.54	2104.58	16.963	1962.95	1975.26	-12.316	2222.63	2093.41	129.225	2317.21	2257.12	60.091	1924.24	1996.12	-71.871	2601.43	2561.23	40.204	2027.32	2054.06	-26.741	2010.05	2085.68	-75.627	2455.07	2392.19
2212.34	2097.71	114.624	2390.28	2080.74	309.538	2700.58	2606.86	93.713	1860.64	1910.08	-49.437	1919.92	1917.67	2.254	2368.43	2329.15	39.284	2441.42	2375.69	65.733	2555.65	2426.85	128.804	2132.19	2111.95	20.237	1963.42	1985.32	-21.895	2268.63	2100.41	168.223	2308.26	2261.51	46.749	1929.46	1992.85	-63.39	2624.05	2590.89	33.154	2028.44	2073.24	-44.802	2030.86	2107.14	-76.276	2481.3	2406.17
2185.96	2102.67	83.291	2496.81	2079.51	417.302	2711.98	2609.66	102.325	1850.93	1906.24	-55.315	1936.73	1905.41	31.321	2362.87	2327.67	35.196	2453.74	2375.67	78.074	2616.96	2414.66	202.298	2142.08	2107.57	34.513	1972.96	1981.74	-8.786	2275.91	2092.66	183.248	2311.93	2249.97	61.959	1925.42	1994.31	-68.885	2634.66	2603.34	31.32	2053.01	2074.29	-21.283	2035.24	2111.72	-76.487	2493.27	2405.27
2199.03	2110.57	88.456	2544.05	2091.86	452.194	2712.5	2622.38	90.119	1871.13	1905.17	-34.047	1946.72	1903.22	43.498	2365.29	2326.81	38.477	2463.94	2374.4	89.546	2492.51	2416.08	76.433	2132.19	2104.92	27.275	1984.27	1987.26	-2.993	2361.44	2085.11	276.334	2305.57	2253.86	51.712	1920.57	1998.84	-78.269	2631.88	2592.1	39.783	2036.09	2081.19	-45.104	2031.32	2105.82	-74.507	2489.48	2402.78
2197.77	2101.18	96.588	2512.15	2079.89	432.251	2701.27	2614.81	86.463	1870.32	1911.39	-41.066	1983.19	1912.22	70.972	2378.28	2323.88	54.406	2479.81	2389.77	90.041	2539.77	2439.5	100.266	2142.84	2113.91	28.935	1976.53	1996.39	-19.857	2421.61	2087.03	334.583	2318.04	2261.76	56.28	1932.06	1994.06	-61.993	2635.58	2585.19	50.39	2063.7	2077.54	-13.836	2036.99	2100.44	-63.451	2478.89	2402.28
2183.66	2095.26	88.399	2562.56	2065.93	496.628	2702.24	2597.46	104.779	1881.31	1915.85	-34.542	2003.15	1922.85	80.302	2374.63	2343.49	31.138	2450.81	2405.32	45.496	2584.81	2437.85	146.957	2161.55	2123.97	37.586	1984.49	1991.82	-7.337	2488.14	2090.24	397.903	2327.25	2266.92	60.333	1935.8	2001.64	-65.842	2620.53	2571.51	49.024	2016.44	2062.94	-46.502	2022.94	2097.4	-74.459	2459.82	2383.3
2204.78	2100.42	104.361	2611.72	2074.21	537.507	2708.76	2602.63	106.124	1940.56	1930.43	10.131	2048.26	1934.51	113.75	2411.2	2367.87	43.321	2475.16	2427.18	47.984	2607.28	2464.73	142.548	2185.18	2145.44	39.747	1998.62	2016.82	-18.201	2554.65	2118.04	436.61	2358.98	2299.55	59.433	1959.01	2030.71	-71.702	2616.88	2569.69	47.193	2002.33	2056.04	-53.712	2040.33	2086.66	-46.328	2454.92	2383.89
2197.7	2096.01	101.697	2561.67	2066.32	495.347	2689.03	2600.57	88.466	1950.79	1945.98	4.809	2126.03	1947.34	178.686	2411.52	2377.92	33.6	2510.8	2445.3	65.493	2558.57	2478.44	80.123	2174.24	2146.57	27.674	2012.53	2027.32	-14.793	2589.86	2128.88	460.985	2375.37	2320.27	55.103	1977.73	2035.63	-57.897	2592.52	2554.66	37.862	2079.59	2041.82	37.777	2025.16	2082.15	-56.997	2455.51	2375.23
2196.24	2078.05	118.193	2578.1	2056.55	521.551	2691.94	2589.84	102.101	1975.39	1955.6	19.794	2127.61	1958.82	168.8	2410.11	2393.78	16.33	2496.74	2459.59	37.144	2603.86	2481.32	122.537	2181.72	2156.44	25.278	1998.96	2028.04	-29.079	2624.45	2139.73	484.726	2392.05	2339.77	52.284	1983.84	2053.64	-69.8	2590.54	2548.33	42.212	2077.45	2045.01	32.442	2021.12	2064.93	-43.811	2451.73	2374.64
2216.88	2081.11	135.776	2607.55	2052.72	554.829	2682.63	2587.09	95.538	1984.55	1967.72	16.828	2185.15	1965.54	219.611	2419.68	2403.08	16.593	2515.12	2464.34	50.776	2626.81	2500.94	125.875	2184.99	2168.73	16.259	2017.49	2042.59	-25.101	2504.92	2140.81	364.11	2382.03	2332.64	49.387	1983.1	2058.44	-75.341	2585.92	2547.85	38.076	2085.71	2036.21	49.495	2030.24	2067.34	-37.099	2452.18	2370.05
2210.71	2091.84	118.864	2595.54	2063.41	532.139	2650.24	2589.51	60.731	2004.94	1964.7	40.24	2217.4	1963.02	254.374	2404.78	2395.76	9.018	2496.61	2439.75	56.86	2598.57	2493.95	104.614	2192.99	2167.73	25.263	2022.14	2031.74	-9.596	2527.06	2131.35	395.705	2355.92	2313.18	42.741	1974.46	2042.22	-67.766	2583.3	2554.63	28.671	2080.37	2034.56	45.815	2030.58	2068.32	-37.735	2433.23	2379.71
2195.87	2088.61	107.265	2594.21	2068.25	525.958	2681.9	2604.22	77.683	2003.37	1945.95	57.412	2207.92	1956.83	251.082	2379.68	2381.09	-1.407	2478.46	2428.28	50.18	2578.69	2465.25	113.439	2171.38	2153.19	18.194	2013.76	2021.11	-7.343	2506.1	2113.65	392.448	2341.9	2291.73	50.163	1964.65	2033.37	-68.719	2590.19	2554.79	35.403	2057.19	2038.05	19.145	2015.54	2072.45	-56.913	2442.03	2378.27
2202.93	2107.37	95.558	2607.31	2070.75	536.561	2713.72	2619.39	94.337	2018.73	1945.91	72.822	2195.7	1938.96	256.74	2369.15	2366.84	2.308	2470.47	2408.86	61.62	2567.42	2457.96	109.466	2165.68	2147.84	17.847	2035.49	2017.51	17.978	2468	2108.13	359.875	2348.05	2283.62	64.424	1954.7	2019.75	-65.041	2616.18	2567.57	48.615	2049.15	2055.18	-6.035	2014.37	2084.08	-69.719	2475.44	2386.44
2199.62	2103.04	96.584	2556.41	2079.98	476.436	2721.75	2616.74	105.009	2032.71	1950.12	82.589	2266.48	1945.74	320.736	2381.11	2380.75	0.36	2505.52	2442	63.523	2591.4	2468.7	122.693	2183.12	2161.09	22.035	2049.43	2028.37	21.059	2500.82	2092.12	408.7	2337.52	2278.78	58.739	1950.39	2018.69	-68.299	2620.97	2577.84	43.139	2095.26	2069.21	26.044	2044.44	2093.73	-49.286	2473.45	2396.72
2205.13	2092.47	112.657	2531.3	2070.05	461.253	2712.32	2602.82	109.498	2011.72	1937.09	74.635	2236.7	1947.56	289.144	2359.73	2367.88	-8.146	2507.54	2432.29	75.25	2564.65	2463.45	101.2	2164.19	2148.62	15.575	2038.31	2019.69	18.625	2513.6	2096.46	417.143	2349.43	2286	63.435	1951.96	2021.94	-69.977	2610.36	2569.44	40.911	2086.45	2059.48	26.972	2020.4	2081.28	-60.886	2465.96	2388.12
2188.74	2105.79	82.951	2470.87	2080.95	389.921	2680.28	2618.74	61.537	2033.75	1944.13	89.622	2262.82	1950.23	312.593	2340	2377.97	-37.969	2489.96	2439.16	50.8	2550.25	2474.09	76.163	2162.32	2157.09	5.239	2031.57	2026.88	4.692	2438.13	2100.33	337.8	2346.16	2297.45	48.717	1953.93	2027.08	-73.149	2603.49	2571.85	31.647	2056.21	2060.81	-4.602	2032.69	2081.52	-48.829	2463.5	2394.22
2164.92	2103.14	61.785	2514.19	2076.14	438.055	2688.65	2610.9	77.743	1992.64	1943.24	49.406	2206.64	1950.44	256.197	2349.28	2380.97	-31.69	2494.51	2432.16	62.343	2527.37	2475.17	52.204	2158.78	2158.2	0.578	2025.18	2021.62	3.556	2470.71	2103.89	366.821	2335.05	2298.26	36.79	1956.62	2025.84	-69.215	2582.67	2554.4	28.268	2014.72	2052.11	-37.39	2014.55	2070.69	-56.138	2441.22	2378.06
2146.22	2094.67	51.551	2477	2071.29	405.707	2676.21	2605.22	70.997	2029.92	1940	89.929	2298.19	1947.02	351.164	2360.5	2379.81	-19.31	2507.52	2424.89	82.634	2555.39	2474.45	80.939	2156.59	2152.98	3.61	2031.85	2031.82	0.029	2479.95	2103.11	376.837	2348.49	2287.43	61.062	1962.14	2014.78	-52.631	2581.2	2553.86	27.339	2053.12	2045.98	7.138	2009.72	2065.52	-55.8	2426.15	2376.41
2121.17	2088.3	32.875	2456.72	2059.79	396.932	2662.47	2595.64	66.826	2010.24	1940.55	69.69	2248.34	1945.89	302.45	2346.98	2377.17	-30.191	2501.92	2433.27	68.652	2538.4	2471.58	66.817	2160.56	2152.91	7.649	2025.31	2026.24	-0.929	2451.81	2101.01	350.8	2340.5	2292.97	47.538	1961.49	2023.69	-62.205	2570.14	2548.93	21.212	2058.83	2036.66	22.164	2010.4	2061.8	-51.407	2426.93	2372.39
2134.27	2066.83	67.438	2406.78	2038.67	368.102	2629.01	2567.07	61.944	1975.24	1930.24	45	2255.98	1940.41	315.577	2318.87	2371.21	-52.342	2479.28	2424.45	54.833	2521.23	2462.17	59.058	2146.7	2146.01	0.692	2021.73	2021.03	0.699	2383.91	2091.9	292.009	2315.5	2285.58	29.921	1945.53	2010.35	-64.817	2546.62	2516	30.628	2023.91	2023.82	0.087	1995.82	2034.87	-39.049	2395.15	2344.41
2101.45	2055.32	46.12	2400.42	2039.73	360.693	2632.86	2566.15	66.71	1927.03	1939.82	-12.786	2204.97	1929.26	275.71	2318.94	2357.84	-38.902	2474.42	2407.37	67.056	2516.84	2447.22	69.627	2143.79	2135.44	8.352	2017.18	2008.28	8.903	2337.56	2084.7	252.867	2318.52	2271.32	47.196	1941.33	2011.29	-69.953	2548.49	2511.75	36.747	1981.31	2020.41	-39.101	1988.98	2030.98	-41.997	2396.62	2333.05
2106.25	2043	63.249	2370.14	2024.93	345.209	2586.61	2554.76	31.853	1937.68	1923.55	14.132	2198.52	1933.65	264.866	2322.04	2355.28	-33.238	2459.28	2403.97	55.314	2507.78	2441.03	66.753	2145.57	2132.63	12.94	2004.42	2016.08	-11.661	2334.51	2082.15	252.36	2316.7	2255.48	61.227	1940.32	2003.94	-63.623	2540.68	2503.29	37.391	2021.83	2011.89	9.94	1969.59	2020.1	-50.507	2382.72	2330.88
2106.54	2042.53	64.013	2344.43	2010.99	333.449	2598.55	2539.31	59.239	1918.77	1918.82	-0.058	2160.45	1928.86	231.592	2325.09	2335.99	-10.9	2474.33	2397.29	77.044	2494.1	2431.24	62.86	2137.68	2122.57	15.113	1998.77	2012.38	-13.612	2315.53	2075.47	240.063	2315.13	2263.39	51.737	1937.39	1995.22	-57.829	2523.99	2496.7	27.285	1988.31	2004.33	-16.023	1975.65	2013.11	-37.457	2374.31	2313.29
2125.27	2029.1	96.165	2316.23	2008.15	308.074	2603.96	2537.71	66.253	1917.87	1906.2	11.674	2104.04	1906.97	197.07	2293.73	2314.13	-20.4	2443.67	2374.87	68.802	2466.28	2404.25	62.031	2109.08	2099.27	9.808	1986.57	1979.09	7.487	2292.64	2069.07	223.564	2294.36	2251.13	43.232	1923.99	1992.74	-68.746	2510.08	2483.77	26.306	1984.07	1995.63	-11.562	1948.62	2007.7	-59.075	2371.72	2310.72
2131.54	2024.91	106.629	2299.54	2004.02	295.52	2612.6	2528.52	84.082	1930.34	1904.95	25.391	2016.42	1897.3	119.116	2293.63	2304.7	-11.068	2425.03	2358.91	66.119	2448.53	2398.27	50.262	2099.08	2100.62	-1.539	1966.01	1985.91	-19.901	2259.22	2060.63	198.594	2295.06	2234.86	60.202	1916.5	1982.4	-65.894	2504.39	2484.43	19.961	1970.68	1995.44	-24.757	2268.33	2000.77	267.561	2360.06	2306.33
2102.87	2021.93	80.942	2281.19	2002.35	278.839	2601.74	2529.99	71.759	1909.14	1894.8	14.345	2038.77	1896.05	142.715	2275.87	2299.84	-23.978	2418.43	2351.5	66.928	2452.75	2392.1	60.651	2082.99	2083.12	-0.139	1952.51	1972.29	-19.778	2229.83	2067.09	162.746	2286.36	2227.9	58.464	1912.64	1976.31	-63.664	2507.34	2485.65	21.696	1989.26	1991.29	-2.029	2236.01	1997.67	238.338	2356.12	2311.95
2100.31	2035.95	64.353	2279.34	2011.99	267.352	2628.52	2554.01	74.508	1894.8	1885.5	9.295	2142.51	1893.55	248.961	2282.67	2299.72	-17.044	2430.98	2352.36	78.619	2431.45	2387.46	43.988	2079.14	2078.91	0.236	1959.98	1964.77	-4.791	2211.63	2058.02	153.609	2280.97	2235.03	45.935	1907.78	1973.87	-66.097	2524.99	2490.06	34.929	2000.22	2001.28	-1.053	2311.96	2009.22	302.742	2377.99	2312.3
2097.71	2042.56	55.15	2270.38	2022.62	247.755	2629.25	2557.69	71.556	1900.07	1885.88	14.188	2088.84	1890.02	198.818	2283.76	2298.65	-14.886	2420.49	2350.61	69.881	2437.4	2397.52	39.877	2083.64	2084.36	-0.716	1949.54	1963.27	-13.724	2184.53	2058.42	126.105	2280.25	2225.55	54.698	1912.18	1973.24	-61.058	2517.74	2485.59	32.147	1946.53	1986.68	-40.16	2285.46	1996.03	289.434	2373.59	2315.26
2092.7	2032.7	59.997	2219.21	2010.87	208.335	2625.16	2544.94	80.222	1883	1889.44	-6.437	2035.83	1885.75	150.085	2290.63	2298.57	-7.942	2401.97	2353.6	48.367	2454.12	2390.39	63.733	2089.79	2084.53	5.261	1946.77	1968.27	-21.506	2174.98	2052.63	122.35	2284.49	2225.87	58.62	1906.51	1977.05	-70.542	2522.12	2481.27	40.848	1959.66	1994.36	-34.698	2313.06	1999.34	313.72	2367.22	2304.5
2089.38	2019.4	69.983	2197.48	1995.46	202.024	2608.2	2525.4	82.795	1883.49	1881.19	2.303	1972.12	1888.24	83.875	2287.21	2300.98	-13.765	2439.74	2358.82	80.922	2464.92	2393.08	71.838	2091.9	2077.57	14.332	1943.12	1974.29	-31.173	2172.91	2049.12	123.784	2312.77	2239.56	73.218	1914.67	1980.05	-65.381	2514.55	2479.16	35.398	1973.3	1994.31	-21.014	2248.06	1990.09	257.971	2359.3	2302.51
2070.28	2014.72	55.567	2178.57	1994.6	183.973	2608.21	2513.95	94.264	1874.59	1877.22	-2.633	1977.13	1893.06	84.067	2294.23	2305.36	-11.131	2437.61	2357.16	80.448	2467.41	2391.63	75.778	2099.01	2089.33	9.673	1950.76	1970.58	-19.827	2163.61	2050.42	113.192	2307.63	2232.81	74.816	1906.4	1973.58	-67.179	2506.75	2460.15	46.602	1953.61	1987.42	-33.813	2236.49	1984.62	251.867	2352.73	2291.24
2103.61	2024.05	79.562	2148.37	1992.05	156.323	2594.9	2516.12	78.785	1865.43	1884.27	-18.837	1998.23	1890.55	107.681	2290.62	2309.66	-19.044	2434.41	2368.42	65.993	2446.39	2398.35	48.041	2098.8	2088.32	10.483	1950.33	1984.06	-33.732	2142.85	2054.74	88.11	2302.16	2240.86	61.297	1913.33	1976.69	-63.364	2503.84	2460.35	43.492	1930.69	1968.9	-38.208	2216.26	1974.85	241.409	2342.51	2290.01
2119.37	2016.42	102.951	2129.4	1981.53	147.872	2592.63	2526.91	65.716	1858.76	1885.08	-26.316	2030.05	1898.21	131.843	2297.09	2317.7	-20.619	2443.96	2369.91	74.048	2469.01	2405.25	63.762	2100.17	2094.68	5.491	1958.95	1978.23	-19.281	2141.36	2056.19	85.169	2322.32	2243.33	78.996	1915.99	1973.01	-57.018	2507.6	2461.55	46.052	1952.04	1975.15	-23.118	2225.36	1978.2	247.164	2353	2298.34
2112.54	2023.5	89.041	2116.64	1990	126.64	2595.94	2525.92	70.015	1866.31	1881.84	-15.523	1909.57	1902.57	7.007	2307.5	2311.76	-4.261	2431.21	2370	61.206	2458.09	2405.1	52.999	2096.7	2102.14	-5.439	1950.29	1983.29	-33.004	2120.34	2059.23	61.105	2315.55	2239.89	75.669	1916.82	1980.91	-64.083	2506.21	2462.13	44.079	1932.87	1978.78	-45.915	2292.8	1977.56	315.238	2352.17	2303.68
2144.74	2032.36	112.383	2114.53	2010.26	104.277	2640.09	2542.51	97.579	1843.75	1878.93	-35.182	1918.07	1893.16	24.916	2305.07	2306.81	-1.737	2422.36	2361.27	61.084	2443.13	2401.33	41.802	2098.72	2084.87	13.852	1961.88	1983.37	-21.482	2109.68	2046.03	63.647	2310.02	2237.61	72.406	1907.85	1968.72	-60.878	2518.07	2481.2	36.873	1931.19	1976.45	-45.265	2135.02	1991.29	143.727	2367.08	2310.07
2168.09	2028.74	139.349	2094.69	2005.32	89.373	2653.1	2551.37	101.735	1843.52	1876.13	-32.614	1915.4	1885.39	30.014	2290.8	2297.39	-6.589	2395.45	2357.64	37.812	2460.68	2385.59	75.085	2080.78	2089.2	-8.416	1941.04	1982.19	-41.144	2095.05	2041.79	53.264	2310.01	2223.41	86.607	1901.07	1968.36	-67.289	2526.88	2498.31	28.561	1941.94	1991.88	-49.933	2142.53	1993.79	148.744	2382.53	2319.04
2183.57	2038.4	145.164	2075.77	2009.29	66.487	2638.84	2559.5	79.349	1831.38	1861.31	-29.932	1870.18	1885.77	-15.593	2268.19	2285.81	-17.62	2384.3	2338.78	45.521	2417.03	2375.81	41.217	2080.41	2078.85	1.563	1931.43	1969.78	-38.348	2071.97	2038.94	33.031	2296.54	2225.11	71.426	1893.44	1960.87	-67.43	2522.13	2489.44	32.689	1955.26	1991.41	-36.154	2189.87	2000.93	188.939	2379.81	2322.26
2183.68	2047.11	136.572	2083.72	2029.06	54.658	2660.74	2570.87	89.878	1832.65	1863	-30.346	1905.71	1884.11	21.601	2272.58	2288	-15.415	2383.86	2340.15	43.711	2429.1	2379.03	50.063	2077.97	2072.12	5.849	1933.43	1973.12	-39.684	2071.53	2040.42	31.105	2283.69	2219.73	63.959	1892.02	1958.19	-66.166	2540.91	2501.77	39.144	1974.52	2007.98	-33.467	2216.41	2013.2	203.215	2392.11	2329
2179.76	2066.88	112.88	2101.93	2038.36	63.571	2709.85	2585.08	124.776	1827.89	1860.15	-32.264	1857.52	1890.2	-32.681	2305.09	2292.09	12.995	2398.14	2351.83	46.311	2474.16	2386.01	88.152	2090.06	2077.55	12.51	1949.35	1977.13	-27.775	2074	2039.68	34.315	2309.84	2223.26	86.581	1894.67	1962.85	-68.174	2570	2522.79	47.213	1973.62	2017.93	-44.314	2260.08	2026.7	233.385	2422.57	2345.01
2216.27	2064.22	152.043	2106.93	2035.38	71.544	2699.52	2575.64	123.88	1827	1873.16	-46.163	1883.32	1891.23	-7.91	2307.36	2316.06	-8.696	2412.29	2364.58	47.711	2483.31	2402.64	80.665	2096.4	2095.87	0.531	1965.42	1995.08	-29.658	2071.98	2040.72	31.26	2318.79	2233.7	85.086	1899.24	1963.82	-64.58	2576.05	2527.48	48.572	1981.67	2024.27	-42.595	2173.49	2023.7	149.795	2407.3	2345.04
2223.62	2058.79	164.826	2074.43	2036.66	37.77	2662.09	2580.56	81.527	1825.96	1864.94	-38.985	1906.62	1889.61	17.013	2289.82	2300.97	-11.158	2379.75	2366.04	13.711	2435.36	2396.55	38.809	2094.51	2091.45	3.055	1935	1996.68	-61.682	2060.82	2046.91	13.91	2294.58	2233.87	60.718	1910.51	1972.86	-62.352	2552.03	2521.35	30.683	1990.49	2021.33	-30.838	2221.88	2023	198.884	2400.04	2336.25
2208.73	2056.4	152.33	2088.28	2033.28	55.008	2657.57	2588.04	69.531	1823.64	1871.12	-47.484	1926.23	1892.54	33.689	2283.71	2313.62	-29.912	2398.03	2366.47	31.56	2453.96	2402.28	51.674	2087.54	2095.88	-8.343	1931.93	1996.03	-64.102	2060.16	2045.61	14.553	2300.07	2248.03	52.04	1915.06	1974.95	-59.899	2554.66	2534.06	20.601	2013.96	2026.32	-12.364	2243.67	2031.85	211.825	2407.05	2351.51
2205.79	2060.1	145.689	2082.84	2035.97	46.871	2675.12	2582.39	92.729	1822.19	1870.23	-48.042	1915.48	1899.21	16.275	2285.56	2318.32	-32.764	2409.36	2373.21	36.149	2451.08	2408.43	42.652	2102.32	2103.19	-0.871	1947.33	1998.88	-51.559	2063.84	2060.55	3.293	2313.21	2247.02	66.183	1920.36	1976.54	-56.179	2550.49	2523.34	27.155	2042.43	2023.11	19.325	2252.67	2021.59	231.085	2422.35	2343.84
2212.97	2048.76	164.211	2061.8	2026.49	35.311	2645.69	2561.12	84.573	1814.13	1872.48	-58.35	1847.64	1905.43	-57.788	2294.11	2310.55	-16.442	2424.55	2369.03	55.52	2445.71	2406.61	39.093	2106.05	2103.37	2.684	1941.74	1999.51	-57.765	2061.76	2061.98	-0.219	2295.63	2248.81	46.825	1917.56	1985.29	-67.734	2537.71	2510.97	26.732	2055.49	2007.29	48.202	2243.48	2014.41	229.072	2400.66	2332.53
2213.28	2034.77	178.511	2048.32	2017.88	30.443	2628.32	2553.29	75.034	1823.5	1875.42	-51.919	1862.56	1902.89	-40.324	2300.27	2318.85	-18.577	2437.95	2372	65.943	2435.04	2404.78	30.256	2095.58	2095.47	0.113	1936.21	1998.1	-61.886	2059.25	2059.31	-0.061	2295.57	2256.96	38.612	1916.1	1988.81	-72.713	2514.95	2485.44	29.51	2051.63	1997.35	54.289	2198.83	2004.05	194.779	2396.32	2318.5
2222.07	2036.58	185.493	2040.38	2005.3	35.079	2624.33	2547.21	77.118	1824.32	1885.3	-60.984	1870.55	1907.82	-37.264	2269.18	2325.59	-56.414	2444.29	2374.07	70.217	2443.99	2410.79	33.198	2090.2	2102.07	-11.863	1936.54	1996.81	-60.268	2046.11	2062.53	-16.413	2298.43	2259.67	38.762	1923.74	1982.18	-58.439	2500.86	2484.95	15.912	2049.43	1990.66	58.766	2144.12	1995.88	148.239	2381.41	2304.55
2230.51	2024.99	205.522	2033.24	2004.87	28.379	2621.22	2534.92	86.299	1826.29	1881.79	-55.5	1860.03	1892.11	-32.087	2287.16	2321.56	-34.401	2489.47	2370.6	118.868	2434.93	2397.1	37.831	2089.47	2101.34	-11.864	1936.21	1996.78	-60.569	2055.79	2067.77	-11.985	2296.13	2243.03	53.102	1922.51	1980.05	-57.546	2497.37	2470.2	27.171	2056.64	1986.78	69.863	2168.77	1993.45	175.326	2378.54	2298.8
2256.78	2017.27	239.512	2022.97	1999.54	23.433	2616.15	2519.82	96.325	1818.7	1868.55	-49.85	1842.91	1901.44	-58.522	2283.55	2312.97	-29.416	2505.19	2367.35	137.838	2439.3	2399.48	39.817	2084.18	2094.09	-9.914	1938.62	1994.73	-56.108	2043.93	2046.82	-2.892	2283.95	2238.84	45.116	1905.43	1968.65	-63.218	2478.87	2445	33.869	2043.57	1968.27	75.307	2161.8	1973.92	187.879	2377.98	2283.34
2276.68	2009.79	266.889	2007.22	1981.96	25.258	2597.89	2506.61	91.277	1809	1871.23	-62.225	1854.83	1890.56	-35.723	2276.16	2298.09	-21.923	2599.91	2351.29	248.618	2424.85	2387.63	37.22	2075.69	2085.32	-9.636	1935.05	1989.92	-54.871	2035.84	2044.54	-8.703	2273.35	2229.48	43.873	1903.91	1963.23	-59.321	2475.39	2445.18	30.213	2039.88	1965.66	74.216	1966.51	1970.07	-3.56	2395.07	2280.79
2262.17	2006	256.17	2012.43	1978.03	34.396	2579.92	2515.39	64.535	1803.37	1852.77	-49.4	1842.4	1876.87	-34.477	2254.62	2285.18	-30.56	2636.98	2325.85	311.134	2398.44	2369.94	28.501	2060.26	2072.8	-12.539	1906.73	1963.91	-57.181	2021.49	2041.54	-20.053	2270.9	2216.41	54.488	1894.97	1954.18	-59.211	2459.99	2438.92	21.068	2042.4	1952.46	89.944	1960.46	1962.49	-2.032	2395.01	2269.8
2262.68	1990.55	272.129	2012.38	1979.39	32.987	2589.38	2500.78	88.596	1787.13	1852.55	-65.424	1829.32	1867.86	-38.533	2249.96	2272.92	-22.962	2809.38	2313.89	495.491	2382.78	2351.01	31.77	2049.78	2055.16	-5.384	1895.13	1960.48	-65.351	2034.7	2043.38	-8.68	2262	2208.3	53.701	1891.15	1956.74	-65.595	2461.02	2440.66	20.365	2060.95	1953.59	107.363	2045.07	1967.73	77.334	2398.91	2266.1
2261.36	2002.74	258.622	2012.24	1982.88	29.369	2614.77	2513	101.773	1793.21	1839.74	-46.531	1824.02	1860.45	-36.432	2239.09	2264.87	-25.78	2983.16	2303.34	679.824	2374.24	2342.75	31.49	2047.97	2046.73	1.237	1898.9	1952.11	-53.204	2036.08	2043.11	-7.027	2255.16	2208.25	46.908	1895.85	1951.57	-55.713	2462.79	2433.3	29.496	2013.12	1955.51	57.609	2008.38	1954.51	53.861	2412.05	2265.16
2248.04	2004.33	243.717	2027.38	1987.32	40.066	2624.44	2509.74	114.694	1782.24	1838.27	-56.031	1817.66	1853.67	-36.009	2237.63	2254	-16.369	2973.08	2308.97	664.113	2380.86	2345.2	35.663	2041.85	2052.01	-10.159	1895.43	1950.08	-54.651	2026.61	2024.46	2.15	2258.66	2202.95	55.705	1879.99	1941.46	-61.47	2484.69	2452.16	32.521	2080.48	1964.7	115.783	1959.36	1965.26	-5.894	2462.86	2281.17
2218.24	1998.48	219.756	2019.48	1972.21	47.276	2625.27	2503.37	121.896	1761.87	1829.51	-67.639	1803.99	1852.39	-48.395	2237.03	2261.58	-24.548	3018.67	2290.45	728.223	2360.66	2336.05	24.608	2044.12	2041.17	2.955	1889.85	1943.46	-53.613	2014.65	2022.42	-7.765	2254.14	2197.83	56.31	1880.29	1942.16	-61.874	2484.29	2457.37	26.915	2037.01	1972.33	64.688	1899.94	1975.85	-75.916	2487.34	2279.95
2206.92	1995.96	210.962	2041.65	1979.58	62.066	2618.47	2494.37	124.102	1785.75	1830.18	-44.438	1809.37	1850.39	-41.021	2242.04	2262.67	-20.627	3110.48	2312.15	798.326	2355.84	2343.61	12.225	2045.85	2045.46	0.391	1901.3	1945.84	-44.537	2001.93	2024.48	-22.553	2255.52	2205.34	50.177	1878.46	1940.35	-61.887	2473.17	2433.55	39.621	2071.14	1962.62	108.52	1893.43	1960.53	-67.098	2505.56	2266.89
2140.3	1976.82	163.487	2022.71	1964.54	58.166	2603.13	2473.35	129.78	1782.19	1837.41	-55.222	1815.74	1852.02	-36.279	2244.47	2247.62	-3.149	3475.05	2299.42	1175.63	2369.51	2334.61	34.907	2051.46	2050.64	0.823	1900.79	1947.87	-47.089	2011.72	2015.43	-3.711	2263.8	2197.65	66.154	1874.86	1935.95	-61.09	2453.99	2420.57	33.421	2021.23	1944.93	76.303	1872.44	1953.67	-81.23	2497.8	2250.14
2181.69	1964.93	216.767	2024.03	1946.79	77.24	2561.81	2476.52	85.286	1774.56	1831.28	-56.714	1808.06	1855.05	-46.99	2228.59	2262.89	-34.298	3634.32	2308.96	1325.36	2374.64	2344.84	29.798	2038.43	2048.33	-9.893	1899.39	1946.36	-46.969	2002.61	2017.19	-14.575	2262.77	2205.84	56.93	1883.65	1942.5	-58.853	2441.47	2418.9	22.572	1975.64	1935.18	40.455	1874.25	1938.99	-64.74	2522.65	2241.44
2190.59	1967.62	222.971	2028.47	1947.04	81.428	2585.58	2460.67	124.913	1781.04	1838.24	-57.196	1804.34	1852.97	-48.628	2249.35	2265.08	-15.726	3907.57	2304.08	1603.49	2374.13	2348.11	26.021	2041.85	2048.93	-7.085	1898.43	1938.7	-40.277	2006.14	2019.96	-13.819	2260.67	2198.71	61.957	1872.86	1935.63	-62.778	2433.61	2408.81	24.798	2057.12	1927.82	129.3	1866.32	1935.37	-69.051	2537.15	2238.12
2190.59	1973.51	217.083	2031.66	1961	70.66	2582.76	2474.93	107.829	1771.77	1835.49	-63.722	1802.88	1859.11	-56.221	2250.25	2266.59	-16.344	3841.07	2309.49	1531.58	2403.4	2349.02	54.382	2047.35	2060.41	-13.061	1903.25	1954.02	-50.768	2001.53	2017.99	-16.46	2273.35	2201.88	71.469	1875.82	1941.49	-65.669	2451.26	2429.88	21.386	2028.27	1945.14	83.129	1899.68	1952.43	-52.752	2514.27	2252.06
2190.59	1982.4	208.19	2031.79	1953.37	78.42	2586.37	2486.92	99.45	1774.97	1833.05	-58.077	1815.79	1854.55	-38.754	2244.39	2262.89	-18.502	4244.24	2309.11	1935.12	2389.07	2339.68	49.383	2045.6	2057.73	-12.131	1895.58	1951.88	-56.304	2000.19	2003.3	-3.113	2259.83	2196.24	63.582	1870.4	1935.72	-65.326	2458.94	2415.56	43.381	1977.13	1938.94	38.196	1883.42	1946.02	-62.601	2598.38	2248.71
2190.59	1995.13	195.464	1947.51	1973.49	-25.987	2601.18	2490.18	111	1782.64	1836.87	-54.233	1813.94	1851.13	-37.192	2240.38	2262.78	-22.398	3252.29	2309.59	942.697	2412.27	2344.98	67.291	2041.64	2054.1	-12.457	1902.18	1954.66	-52.477	1991.61	2017.69	-26.078	2261.45	2189.76	71.692	1870.4	1931.63	-61.234	2476.59	2441.43	35.16	1972.81	1954.75	18.063	1887.47	1959.57	-72.095	2620.65	2269.29
[truncated: 73 more columns]

## Sheet: 070312
field1_cell1avg	field1_cell1bkg	field1_cell1sub	field1_cell2avg	field1_cell2bkg	field1_cell2sub	field1_cell3avg	field1_cell3bkg	field1_cell3sub	field1_cell6avg	field1_cell6bkg	field1_cell6sub	field2_cell1avg	field2_cell1bkg	field2_cell1sub	field2_cell2avg	field2_cell2bkg	field2_cell2sub	field2_cell3avg	field2_cell3bkg	field2_cell3sub	field2_cell4avg	field2_cell4bkg	field2_cell4sub	field2_cell5avg	field2_cell5bkg	field2_cell5sub	field2_cell6avg	field2_cell6bkg	field2_cell6sub	field2_cell7avg	field2_cell7bkg	field2_cell7sub	field3_cell2avg	field3_cell2bkg	field3_cell2sub	field3_cell3avg	field3_cell3bkg	field3_cell3sub	field3_cell4avg	field3_cell4bkg	field3_cell4sub	field3_cell5avg	field3_cell5bkg	field3_cell5sub	field3_cell6avg	field3_cell6bkg	field3_cell6sub	field4_cell1avg	field4_cell1bkg
1124.23	1066.46	57.764	1191.03	1054.68	136.352	1038.32	953.298	85.017	1098.59	1015.94	82.653	932.358	893.399	38.959	1196.08	1001.37	194.711	1188.94	1005.03	183.916	1011.97	949.425	62.541	1172.44	1075.3	97.141	954.235	977.805	-23.57	945.998	854.632	91.366	1102.1	1048.05	54.053	1176.48	1054.74	121.737	1171.96	1080.42	91.541	1097.69	1026.64	71.054	1082.78	990.961	91.815	1134.26	1045.94
1115.83	1049.25	66.574	1165.07	1039.57	125.503	1017.02	938.714	78.305	1073.62	1000.26	73.359	934.351	890.477	43.874	1174.87	998.46	176.412	1173.33	996.049	177.285	991.702	937.048	54.654	1146.51	1060.98	85.522	940.296	965.798	-25.502	936.883	845.94	90.943	1092.38	1037.81	54.563	1161.53	1052.7	108.83	1149.67	1067.18	82.483	1078.75	1018.6	60.156	1069.34	978.251	91.089	1117.06	1027.17
1108.73	1046.32	62.404	1150.79	1037.61	113.179	1013.72	946.675	67.047	1076.61	1001.54	75.072	916.987	886.683	30.304	1162.3	992.326	169.971	1158.86	996.948	161.912	994.008	939.168	54.84	1148.89	1057.39	91.498	942.771	969.422	-26.651	937.289	846.521	90.768	1085.4	1038.96	46.444	1163.28	1049.21	114.07	1147.33	1066.51	80.828	1069.37	1018.04	51.333	1066.77	976.754	90.013	1110.52	1017.71
1108.57	1038.82	69.755	1139.77	1027.29	112.48	1004.35	938.011	66.335	1069.22	995.875	73.348	900.477	878.357	22.12	1156.26	985.108	171.154	1146.05	988.63	157.417	981.191	929.553	51.638	1132.3	1048.59	83.703	929.749	961.713	-31.964	919.632	837.298	82.334	1076.32	1025.2	51.119	1142.5	1036.88	105.624	1146.92	1052.82	94.102	1043.27	1007.75	35.521	1050.44	967.006	83.439	1078.76	1011.49
1092.88	1035.97	56.919	1126.27	1034.75	91.517	1000.03	931.584	68.45	1065.95	990.405	75.541	901.257	882.759	18.498	1148.88	986.086	162.793	1129.91	984.492	145.422	974.196	933.854	40.342	1121.69	1051.98	69.712	939.309	957.037	-17.728	920.988	836.678	84.31	1072.23	1027.89	44.336	1140.03	1039.47	100.562	1148.7	1054.45	94.25	1049.23	1008.04	41.198	1059.67	969.617	90.058	1089.51	1011.39
1102.49	1038.71	63.782	1122.76	1029.83	92.93	1001.88	932.914	68.961	1054.73	992.273	62.455	905.882	877.141	28.741	1158.74	983.426	175.319	1133.07	990.126	142.943	969.926	928.131	41.795	1116.33	1054.11	62.226	934.269	963.972	-29.703	912.265	840.107	72.158	1079.3	1030.11	49.182	1136.68	1042.08	94.61	1136.9	1057.25	79.653	1062.62	1008.23	54.391	1042.74	968.913	73.823	1092.92	1010.6
1102.09	1031.37	70.728	1127.23	1032.6	94.629	988.312	928.93	59.382	1050.08	995.923	54.153	901.573	877.077	24.496	1149.3	987.252	162.046	1141.26	988.732	152.531	969.477	930.958	38.519	1115.33	1052.51	62.816	933.772	968.581	-34.809	911.18	840.007	71.173	1075.4	1029.57	45.83	1136.21	1038.09	98.125	1133.04	1060.21	72.831	1061.62	1011.08	50.538	1045.67	969.674	75.999	1086.32	1016.29
1103.87	1037.93	65.937	1116.95	1028.94	88.013	985.656	936.686	48.97	1060.76	996.447	64.311	900.187	880.297	19.89	1143.37	985.057	158.309	1137.08	992.637	144.439	963.218	932.999	30.219	1116.68	1048.43	68.257	928.809	962.188	-33.379	907.21	845.957	61.253	1075.09	1034.27	40.821	1131.09	1045.22	85.873	1128.78	1062.23	66.549	1057.08	1016.6	40.481	1043.62	969.892	73.728	1086.57	1012.38
1100.69	1031.23	69.458	1118.35	1030.48	87.866	982.201	931.449	50.752	1066.77	992.637	74.132	886.781	880.304	6.477	1144.88	981.024	163.851	1131.37	987.215	144.155	965.508	931.081	34.427	1113.52	1053.01	60.505	940.417	964.87	-24.453	908.388	845.719	62.669	1067.92	1029.91	38.011	1126.02	1041.35	84.667	1130.7	1060.03	70.671	1062.63	1014.15	48.486	1044.17	970.128	74.047	1083.53	1017.12
1102.57	1041.5	61.063	1110.25	1031.36	78.893	990.338	932.6	57.738	1064.51	992.623	71.886	884.071	876.181	7.89	1133.2	987.649	145.552	1121.96	989.635	132.33	974.258	930.642	43.616	1116.52	1048.78	67.734	932.101	960.506	-28.405	903.468	843.116	60.352	1065.76	1032.27	33.492	1125.24	1044.41	80.835	1123	1062.79	60.207	1066.82	1013.41	53.412	1033.76	969.195	64.564	1079.12	1023.46
1089.21	1036.43	52.78	1110.96	1030.01	80.957	988.83	930.216	58.614	1067.89	1002.15	65.738	897.283	879.849	17.434	1148.91	984.827	164.081	1114.57	992.187	122.38	976.896	928.836	48.06	1115.82	1053.06	62.764	931.377	961.658	-30.281	901.455	842.775	58.68	1075.92	1030.87	45.051	1124.84	1042.61	82.221	1130.43	1064.71	65.719	1062.53	1016.15	46.377	1031.23	974.019	57.211	1081.27	1023.47
1101.43	1027.26	74.167	1112.47	1032.83	79.642	984.068	935.586	48.482	1063.84	998.333	65.505	884.294	876.732	7.562	1133.11	984.66	148.452	1117.18	988.933	128.245	969.776	933.782	35.994	1108.43	1051.36	57.069	932.651	960.249	-27.598	905.018	839.698	65.32	1073.38	1028.04	45.344	1121.89	1043.46	78.428	1130.12	1060.72	69.392	1069.16	1008.12	61.04	1039.94	973.471	66.465	1080.4	1020.97
1098.67	1038.99	59.684	1111.8	1030.01	81.782	984.265	935.234	49.031	1060.93	991.363	69.57	890.669	880.725	9.944	1140.33	985.442	154.884	1110.19	993.153	117.033	970.317	929.208	41.109	1111.33	1047.24	64.095	928.957	960.436	-31.479	902.568	840.169	62.399	1075.04	1034.33	40.715	1123.13	1042.66	80.467	1113.93	1059.24	54.685	1055.95	1011.22	44.738	1037.34	971.072	66.268	1073.42	1017.21
1077.07	1041.21	35.858	1105.82	1029.53	76.294	978.563	936.82	41.743	1074.42	998.033	76.392	888.787	880.939	7.848	1139.21	985.84	153.366	1119.49	992.156	127.331	975.658	928.106	47.552	1110.46	1055.36	55.1	932.099	961.815	-29.716	897.273	840.353	56.92	1073.92	1034.51	39.409	1113.47	1037.79	75.682	1113.14	1061.78	51.363	1059.92	1010.09	49.834	1029.73	971.08	58.65	1068.3	1016.71
1083.74	1036.68	47.06	1103.57	1027.26	76.305	982.628	931.277	51.351	1068.92	995.45	73.475	885.077	876.223	8.854	1137.64	982.924	154.715	1120.5	990.302	130.198	981.132	931.6	49.532	1114.95	1052.13	62.821	931	957.848	-26.848	904.539	840.177	64.362	1079.05	1030.95	48.098	1121.13	1044.64	76.486	1115.65	1061.51	54.147	1064.54	1011.73	52.807	1027.12	974.514	52.611	1075.17	1022.85
1098.49	1040.82	57.678	1105.47	1029.26	76.218	969.823	930.775	39.048	1068.47	988.77	79.703	887.657	877.234	10.423	1146.44	981.135	165.305	1117.27	984.45	132.818	977.422	933.296	44.126	1115.03	1051.94	63.089	927.259	957.206	-29.947	896.954	841.411	55.543	1076.76	1032.6	44.159	1122.85	1041.7	81.155	1116.63	1066.31	50.324	1067.35	1014.43	52.917	1030.1	976.737	53.364	1074.53	1025.07
1098.85	1034.97	63.884	1109.47	1030.56	78.915	969.266	934.248	35.018	1074.59	996.973	77.621	886.682	875.692	10.99	1161.59	986.297	175.289	1108.31	986.868	121.44	980.387	931.399	48.988	1116.82	1050.71	66.111	928.645	960.772	-32.127	892.679	837.701	54.978	1079.04	1034.8	44.238	1120.38	1041.53	78.852	1114.98	1062.52	52.465	1055.29	1012.87	42.417	1025.64	968.331	57.312	1074.73	1015.89
1095.58	1040.14	55.446	1118.04	1029.23	88.805	972.11	933.604	38.506	1086.22	994.661	91.558	882.378	878.822	3.556	1140.7	982.317	158.388	1117.33	991.833	125.501	981.482	933.718	47.764	1120.57	1050.41	70.157	932.642	962.578	-29.936	898.058	839.118	58.94	1083.47	1031.52	51.95	1121.37	1042.54	78.836	1117.43	1060.78	56.649	1067.73	1010.1	57.629	1026.14	971.32	54.824	1078.47	1022.03
1102.85	1035.72	67.129	1105.69	1027.54	78.144	968.701	932.623	36.078	1089.26	989.6	99.659	896.851	880.386	16.465	1160.47	983.362	177.111	1100.6	986.755	113.845	982.586	932.774	49.812	1122.11	1050.81	71.301	934.358	959.692	-25.334	892.278	843.084	49.194	1082.65	1026.78	55.874	1111.85	1039.3	72.549	1109.55	1063.23	46.314	1067.97	1006.3	61.668	1040.98	968.623	72.356	1078.01	1014.3
1087.71	1037.34	50.374	1109.24	1028.83	80.407	971.736	935.101	36.635	1099.64	995.28	104.358	897.086	872.822	24.264	1169.7	985.245	184.457	1102.12	983.621	118.496	985.051	932.702	52.349	1126.07	1052.13	73.943	929.917	958.431	-28.514	891.835	840.116	51.719	1082.66	1027.04	55.622	1107.83	1039.77	68.053	1110.54	1060.62	49.914	1058.41	1015.43	42.978	1029.28	966.558	62.718	1076.62	1019.75
1096.53	1032.06	64.469	1113.56	1028.31	85.258	965.557	933.632	31.925	1112.71	995.187	117.522	900.244	874.282	25.962	1158.37	985.932	172.436	1120.02	987.252	132.766	984.419	930.038	54.381	1121.44	1049.02	72.421	941.308	963.584	-22.276	892.796	838.617	54.179	1086.44	1030.86	55.576	1110.1	1039.72	70.384	1106.44	1058.67	47.773	1062.54	1011.33	51.206	1014.64	968.447	46.193	1079.71	1016.78
1086.38	1035.78	50.608	1119.25	1027.73	91.518	962.093	926.289	35.804	1090.95	989.405	101.542	901.446	878.102	23.344	1153.26	980.508	172.753	1098.98	987.693	111.288	979.074	928.788	50.286	1123.47	1050.21	73.258	922.608	957.893	-35.285	894.615	841.642	52.973	1092.99	1030.26	62.733	1110.51	1040.52	69.986	1105.37	1059.86	45.51	1074.82	1013.28	61.543	1024.75	972.639	52.112	1083.06	1020.12
1093.07	1034.12	58.948	1124.29	1024.9	99.396	965.059	932.572	32.487	1111.92	993.453	118.466	903.48	873.174	30.306	1156.22	979.94	176.28	1120.95	986.429	134.525	986.872	931.463	55.409	1130.66	1050.01	80.653	932.488	958.352	-25.864	889.481	835.466	54.015	1081.93	1026.2	55.733	1115.53	1039.65	75.88	1104.74	1062.19	42.549	1067.96	1007.58	60.382	1024.31	967.3	57.013	1082.05	1011.12
1101.63	1034.84	66.794	1117.78	1020.12	97.65	959.258	926.147	33.111	1120.97	994.491	126.478	900.04	875.768	24.272	1169.47	981.622	187.847	1121.71	984.785	136.926	997.337	931.528	65.809	1126.3	1050.83	75.468	933.663	957.54	-23.877	896.515	839.773	56.742	1087.56	1029.62	57.941	1108.1	1036.71	71.383	1092.04	1055.43	36.608	1073.33	1012.42	60.918	1036.89	969.815	67.073	1083.79	1017.18
1092.36	1034.92	57.44	1119.28	1025.42	93.857	960.677	931.887	28.79	1124.9	994.924	129.975	897.881	872.053	25.828	1166.24	985.779	180.458	1121.85	982.142	139.712	990.317	929.71	60.607	1134.24	1046.53	87.711	935.479	959.228	-23.749	888.195	837.817	50.378	1083.32	1023.51	59.809	1108.55	1039.31	69.236	1101.52	1054.47	47.052	1067.88	1009.31	58.566	1035.16	968.927	66.231	1082.84	1011.56
1093.81	1039.39	54.415	1103.85	1024.68	79.173	965.899	929.876	36.023	1144.79	986.579	158.208	904.752	877.569	27.183	1175.42	982.01	193.412	1116.15	983.735	132.413	991.303	927.756	63.547	1135.23	1049.42	85.807	936.241	959.552	-23.311	887.788	829.645	58.143	1081.26	1023.68	57.575	1104.67	1032.31	72.365	1091.61	1058.99	32.616	1057.02	1001.34	55.677	1027.27	966.802	60.466	1076.56	1013.71
1100.88	1033.57	67.311	1104.59	1021.13	83.456	957.294	929.817	27.477	1153.3	988.138	165.159	907.817	874.213	33.604	1169.26	983.124	186.14	1111.37	982.435	128.936	982.31	932.869	49.441	1126.85	1044.19	82.662	939.319	955.18	-15.861	887.984	838.004	49.98	1081.35	1026.07	55.286	1106.3	1039.58	66.72	1094.89	1051.16	43.73	1055.17	1008.25	46.915	1037.36	967.456	69.908	1088.68	1013.33
1092.08	1033.44	58.645	1113.61	1025.57	88.041	960.643	928.712	31.931	1143.58	990.102	153.475	914.973	875.853	39.12	1166.81	978.646	188.16	1117.68	987.114	130.57	983.708	926.696	57.012	1137.4	1049.15	88.248	935.844	958.184	-22.34	897.742	834.672	63.07	1082.03	1026.63	55.399	1104.84	1033.89	70.951	1093.09	1049.3	43.792	1064.69	1005.96	58.727	1029.72	967.5	62.223	1085.7	1014.48
1092.49	1031.41	61.076	1109.05	1025.55	83.505	960.673	926.968	33.705	1164.72	987.1	177.617	908.301	872.278	36.023	1157.89	980.809	177.083	1120.17	984.616	135.559	984.64	927.614	57.026	1131.84	1049.44	82.396	940.352	953.157	-12.805	897.756	835.118	62.638	1081.05	1022.97	58.078	1098.68	1036.65	62.033	1101.06	1057.61	43.453	1067.46	1004.42	63.041	1037.17	965.337	71.837	1096.95	1010.79
1096.97	1034.18	62.787	1105.3	1023.43	81.865	968.017	928.671	39.346	1149.45	990.246	159.206	901.575	879.787	21.788	1163.22	983.352	179.864	1115.8	978.412	137.384	983.124	929.982	53.142	1139.67	1048.09	91.582	931.055	954.669	-23.614	901.978	832.683	69.295	1084.99	1026.51	58.481	1102.77	1039.19	63.577	1101.61	1054.71	46.905	1066.57	1007.76	58.808	1040.44	967.891	72.549	1089.37	1013.06
1092.17	1031	61.172	1091.32	1020.65	70.672	965.477	923.825	41.652	1159.12	984.176	174.946	906.02	872.656	33.364	1162.8	977.424	185.376	1111.63	983.236	128.391	980.504	928.572	51.932	1130.24	1045.69	84.549	956.383	953.102	3.281	898.898	830.669	68.229	1081.76	1022.16	59.591	1101.01	1038.52	62.495	1094.26	1055.25	39.014	1061.1	1007.31	53.786	1040.68	967.788	72.89	1084.41	1012.32
1095.52	1033.74	61.78	1097.3	1022.1	75.196	967.825	932.46	35.365	1177.93	989.708	188.223	903.41	872.717	30.693	1150.15	971.028	179.118	1123.32	981.817	141.5	985.912	925.448	60.464	1113.79	1051.7	62.09	937.138	954.929	-17.791	900.876	832.208	68.668	1077.22	1024.66	52.565	1099.53	1036.52	63.006	1101.99	1051.78	50.209	1057.35	1004.62	52.732	1030.22	962.355	67.863	1090.41	1007.47
1091.68	1032.23	59.451	1099.77	1022.88	76.888	966.651	922.78	43.871	1167.95	991.929	176.024	908.985	874.483	34.502	1145.05	976.092	168.961	1116.71	984.035	132.675	972.745	924.554	48.191	1119.9	1048.69	71.204	955.073	953.689	1.384	892.819	830.672	62.147	1072.24	1021.53	50.715	1100.61	1036.18	64.432	1104.45	1047.14	57.308	1061.78	1004.33	57.454	1041.22	964.052	77.166	1088.45	1015.04
1084.55	1033.12	51.429	1103.7	1024.9	78.799	972.218	926.028	46.19	1156.1	983.319	172.777	912.002	873.425	38.577	1147.67	976.047	171.619	1108.81	982.747	126.061	973.215	929.169	44.046	1119.11	1044.02	75.086	930.372	949.603	-19.231	895.193	831.12	64.073	1067.74	1022.93	44.813	1094.79	1039.76	55.026	1108.62	1051.92	56.7	1057.66	1003.12	54.544	1042.14	964.979	77.162	1077.62	1014.87
1079.54	1031.33	48.205	1085.35	1020.18	65.166	966.672	921.269	45.403	1147.44	986.607	160.834	908.031	868.39	39.641	1125.12	976.383	148.738	1123.1	981.921	141.176	977.623	927.022	50.601	1114.92	1045.01	69.915	935.935	949.481	-13.546	897.827	828.612	69.215	1073.97	1018.09	55.881	1088.59	1033.72	54.865	1096.36	1053.64	42.719	1052.02	1003.66	48.358	1028.09	965.479	62.606	1078.96	1010.31
1086.83	1029.98	56.852	1088.01	1026.88	61.13	975.85	926.211	49.639	1133.34	986.328	147.008	904.825	868.066	36.759	1151.59	972.348	179.238	1115.71	980.737	134.973	972.478	919.039	53.439	1099.63	1045.87	53.763	954.483	952.905	1.578	898.058	831.793	66.265	1064.57	1021.91	42.653	1095.88	1031.88	64.001	1102.9	1051.85	51.052	1053.25	1005.73	47.526	1033.69	965.262	68.425	1084.41	1023.99
1075.37	1026.65	48.726	1089.14	1015.2	73.94	977.781	924.921	52.86	1164.52	987.216	177.302	900.619	874.553	26.066	1126.47	976.11	150.362	1106	981.688	124.316	970.246	926.482	43.764	1118.03	1042.31	75.715	942.895	953.338	-10.443	902.089	832.84	69.249	1063.84	1019.11	44.726	1090.78	1032.6	58.185	1102.37	1047.58	54.795	1043.99	1003.9	40.082	1032.66	961.308	71.357	1073.47	1005.2
1073.35	1028.26	45.09	1097.88	1018.41	79.466	977.056	923.317	53.739	1124.25	986.982	137.268	902.746	871.1	31.646	1125.12	981.816	143.309	1115.6	986.993	128.609	965.288	920.472	44.816	1109.65	1043.74	65.909	938.664	947.876	-9.212	898.13	833.85	64.28	1068.8	1019.93	48.87	1088.24	1035.81	52.431	1112.64	1052.66	59.975	1045.47	999.749	45.724	1041.25	964.664	76.59	1072.24	1001.68
1060.69	1028.65	32.044	1096.96	1018.37	78.589	983.134	924.128	59.006	1134.56	986.46	148.101	904.986	870.799	34.187	1121.62	971.345	150.276	1098.64	982.466	116.172	963.317	921.824	41.493	1105.32	1042.41	62.904	936.411	947.262	-10.851	897.367	827.208	70.159	1064.41	1016.4	48.011	1092.05	1031.33	60.721	1098.33	1049.75	48.579	1043.34	1005.24	38.106	1030.56	957.542	73.015	1073.53	1008.25
1063.43	1024.51	38.915	1082.47	1023.49	58.979	982.952	924.975	57.977	1125.11	987.386	137.725	889.456	871.249	18.207	1130.5	975.7	154.802	1102.97	983.593	119.375	953.372	919.949	33.423	1100.22	1038.53	61.69	931.749	947.808	-16.059	898.565	832.259	66.306	1058.55	1019.59	38.967	1087.01	1035.37	51.638	1101.79	1043.63	58.161	1035.98	1003.6	32.382	1031.05	961.21	69.844	1073.49	1003.38
1075.94	1028.08	47.864	1083.8	1014.23	69.571	980.392	919.88	60.512	1124.24	982.085	142.16	897.318	860.612	36.706	1114.69	970.728	143.961	1088.55	976.292	112.258	951.986	927.107	24.879	1103.31	1037.16	66.148	939.952	942.551	-2.599	891.864	829.61	62.254	1054.77	1018.24	36.531	1090.92	1036.55	54.368	1103.36	1047.18	56.175	1036.01	1000.79	35.219	1033.71	958.94	74.772	1062.48	1010.13
1089.44	1027.35	62.088	1082.5	1018.42	64.079	986.876	922.408	64.468	1120.88	979.361	141.517	898.383	867.623	30.76	1125.43	976.585	148.846	1079.39	982.323	97.072	961.418	920.597	40.821	1092.83	1045.03	47.804	942.868	944.887	-2.019	893.551	826.229	67.322	1051.97	1020.65	31.313	1080.08	1028.37	51.707	1099.26	1049.63	49.632	1041.96	1003.49	38.476	1039.75	950.836	88.91	1066.03	1004.64
1083.56	1022.85	60.707	1082.79	1018.39	64.405	977.872	923.477	54.395	1114.47	979.337	135.137	890.755	867.73	23.025	1118.64	974.046	144.598	1095.94	976.806	119.132	956.422	920.074	36.348	1094.32	1036.69	57.628	928.763	942.977	-14.214	896.469	829.459	67.01	1057.86	1017.95	39.911	1088.64	1030.69	57.955	1091.16	1044.6	46.557	1043.27	997.982	45.288	1025.87	959.529	66.341	1065.72	1010.78
1084.37	1029.65	54.713	1076.92	1018.71	58.217	977.283	923.669	53.614	1118.31	982.325	135.989	891.768	863.914	27.854	1113.07	969.416	143.652	1096.28	974.958	121.323	951.198	919.916	31.282	1084.71	1037.62	47.085	943.985	943.791	0.194	881.908	827.944	53.964	1049.51	1020.26	29.247	1088.91	1029.37	59.541	1087.56	1050.82	36.736	1033.96	997.732	36.228	1031.44	960.095	71.345	1059.79	1002.52
1079.07	1022.25	56.819	1080.16	1009.48	70.683	978.377	918.94	59.437	1093.36	977.668	115.69	885.662	865.024	20.638	1105.84	972.806	133.037	1094.67	979.952	114.717	950.937	919.319	31.618	1091.23	1041.02	50.209	939.497	943.92	-4.423	896.96	833.875	63.085	1052.32	1012.63	39.695	1092.74	1027.07	65.67	1075.63	1044.42	31.216	1044.12	999.029	45.088	1028.52	959.5	69.023	1052.45	1001.46
1081.86	1020.65	61.209	1078.32	1006.74	71.574	973.469	914.674	58.795	1089.85	976.931	112.92	891.512	863.031	28.481	1096.79	970.916	125.877	1090.13	976.874	113.258	954.383	923.82	30.563	1083.31	1041.15	42.157	942.312	942.834	-0.522	893.069	826.622	66.447	1048.45	1014.38	34.073	1087.07	1026.91	60.154	1091.52	1050.92	40.602	1040.7	1001.15	39.554	1015.79	958.349	57.44	1058.36	1004.08
1078.59	1021.16	57.437	1075.69	1018.09	57.605	980.985	915.439	65.546	1064.83	979.881	84.95	884.716	869.521	15.195	1098.1	976.108	121.987	1084.83	979.046	105.786	958.889	920.012	38.877	1085.8	1041.45	44.353	951.116	945.872	5.244	890.682	828.741	61.941	1047.37	1015.86	31.502	1084.76	1028.74	56.027	1088.24	1046.97	41.268	1051.42	999.066	52.354	1031.36	962.895	68.46	1056.46	1004.2
1068.63	1021.15	47.479	1074.48	1013.65	60.826	980.343	918.504	61.839	1078.28	974.095	104.183	887.669	866.835	20.834	1101.72	969.872	131.848	1086.4	978.661	107.74	954.214	924.413	29.801	1082.32	1035.14	47.184	920.376	943.538	-23.162	889.937	827.304	62.633	1050.76	1017.29	33.472	1087.87	1025.59	62.277	1073.07	1043.77	29.306	1046.75	994.35	52.396	1024.16	964.157	60.004	1050.84	1003.46
1070.06	1022	48.055	1067.58	1015.38	52.196	977.318	917.74	59.578	1073.28	977.35	95.934	885.584	867.213	18.371	1081.02	975.192	105.826	1076.9	977.966	98.933	958.084	921.439	36.645	1080.55	1039.81	40.736	926.122	943.278	-17.156	881.408	828.65	52.758	1049.25	1013.6	35.652	1083.8	1029.54	54.256	1070.26	1042.22	28.036	1040.5	995.543	44.959	1026.89	963.483	63.408	1053.23	1004.11
1068.36	1021.74	46.624	1071.42	1014.64	56.778	977.57	915.886	61.684	1055.5	976.201	79.302	874.587	866.566	8.021	1088	970.891	117.111	1076.47	976.192	100.281	956.282	919.882	36.4	1072.78	1034.35	38.428	918.613	934.752	-16.139	883.378	830.248	53.13	1054.33	1014.02	40.307	1079.66	1025.49	54.167	1075.78	1044.36	31.416	1048.3	1000.58	47.719	1013.99	957.398	56.594	1053.55	1002
1082.94	1038.33	44.61	1091.54	1029.06	62.48	978.987	931.514	47.473	1078.7	990.614	88.083	895.331	882.988	12.343	1093.95	985.904	108.048	1086.99	991.452	95.543	975.807	937.888	37.919	1090.36	1059.85	30.51	944.303	954.868	-10.565	896.232	844.098	52.134	1071.09	1025.78	45.311	1097.19	1037.65	59.545	1093.47	1058.89	34.585	1067.05	1015.71	51.337	1015.34	976.924	38.411	1065.83	1021.18
1091.45	1034.98	56.473	1091.55	1027.1	64.458	980.185	929.938	50.247	1083.32	991.074	92.25	893.062	876.047	17.015	1088.95	982.425	106.526	1078.37	989.894	88.479	973.039	935.21	37.829	1077.69	1053.24	24.453	931.94	955.513	-23.573	902.353	840.112	62.241	1068.26	1029.64	38.622	1086.1	1037.44	48.657	1086.55	1058.16	28.393	1058.05	1011.98	46.078	1026.81	968.431	58.376	1061.27	1014.16
1088.5	1035.77	52.727	1082.13	1022.57	59.563	976.708	927.179	49.529	1070.94	984.845	86.097	886.969	871.522	15.447	1068.85	975.196	93.652	1064.97	984.922	80.05	971.158	930.293	40.865	1078.21	1046.89	31.328	921.672	949.159	-27.487	890.744	836.225	54.519	1057.69	1019.81	37.881	1080.34	1035.94	44.402	1080.76	1046.99	33.765	1048.17	1002.08	46.093	1013.77	964.841	48.933	1054.48	995.057
1076.26	1020.84	55.419	1076.34	1016.68	59.656	967.194	916.858	50.336	1054.49	976.625	77.867	873.109	868.231	4.878	1088.45	967.568	120.88	1079.99	979.566	100.423	960.883	924.837	36.046	1073.37	1040.13	33.242	926.166	943.388	-17.222	882.188	823.483	58.705	1054.91	1016.08	38.822	1073.08	1027.95	45.127	1075.86	1042.05	33.819	1043.67	995.989	47.686	1006.49	952.607	53.883	1050.88	999.256
1073	1021.17	51.836	1059.92	1012.39	47.539	952.112	913.393	38.719	1043.89	978.118	65.771	877.375	864.114	13.261	1084.08	969.764	114.311	1081.52	975.305	106.21	964.072	920.158	43.914	1054.09	1034.82	19.269	913.775	939.588	-25.813	882.898	828.192	54.706	1053.9	1013.17	40.729	1066.86	1028.4	38.452	1073.16	1040.28	32.882	1037.49	989.692	47.8	1006.49	951.271	55.218	1050.65	998.979
1074.83	1020.19	54.644	1062.31	1015.29	47.027	950.225	916.64	33.585	1044.36	974.14	70.218	879.475	865.946	13.529	1088.82	972.376	116.447	1073.96	976.371	97.592	963.743	921.717	42.026	1064.33	1037.66	26.67	921.58	935.374	-13.794	873.77	825.371	48.399	1061.67	1011.92	49.752	1079.53	1026.65	52.882	1069.91	1042.48	27.428	1061.31	990.375	70.935	1000.69	957.192	43.494	1046.45	1000.5
1073.49	1021.36	52.13	1064.36	1014.71	49.654	940.862	917.033	23.829	1048.21	972.31	75.896	877.548	867.663	9.885	1104.17	967.582	136.587	1076.65	972.89	103.758	962.668	918.435	44.233	1068.49	1039.26	29.225	923.259	938.499	-15.24	876.703	825.533	51.17	1059.69	1011.22	48.476	1083.61	1025.58	58.035	1076.55	1037.87	38.685	1058.43	995.847	62.58	991.302	952.036	39.266	1051.96	997.8
1075.9	1019.49	56.413	1068.8	1010.48	58.32	957.056	920.037	37.019	1044.48	971.808	72.67	877.621	866.649	10.972	1089.33	968.588	120.742	1079.19	972.46	106.73	961.974	921.903	40.071	1077.59	1033.53	44.06	918.223	938.127	-19.904	870.422	825.692	44.73	1059.24	1011.62	47.626	1083.38	1021.59	61.787	1069.41	1034.71	34.695	1055.61	998.085	57.525	996.701	953.514	43.187	1056.32	996.847
1074.28	1018.76	55.512	1074.48	1008.09	66.392	950.106	913.616	36.49	1033.69	977.157	56.534	868.641	861.94	6.701	1100.35	970.223	130.122	1071.34	973.548	97.788	970.969	918.087	52.882	1091.22	1034.25	56.974	916.61	934.622	-18.012	871.427	829.328	42.099	1062.81	1010.31	52.496	1080.25	1026.13	54.119	1074.68	1039.41	35.264	1063	993.722	69.281	986.184	953.304	32.88	1053.41	1001.26
1076.83	1019.86	56.974	1079.48	1009.84	69.638	964.079	913.584	50.495	1042.25	973.155	69.094	874.796	864.477	10.319	1085.85	969.398	116.451	1074.53	972.871	101.659	973.197	919.462	53.735	1094.06	1037.64	56.419	915.646	936.945	-21.299	872.058	829.325	42.733	1058.96	1013.26	45.702	1081.7	1019.16	62.545	1068.41	1036.14	32.27	1053.67	986.407	67.266	1006.68	949.857	56.825	1044.34	1003.95
1074.5	1017.9	56.596	1080.1	1009.85	70.25	955.387	911.342	44.045	1030.65	974.068	56.582	870.883	863.646	7.237	1087.47	962.269	125.198	1071.53	976.555	94.972	971.398	916.548	54.85	1088.81	1034.91	53.896	909.402	943.232	-33.83	865.836	821.865	43.971	1058.91	1011.63	47.281	1075.63	1020.15	55.482	1072.57	1038.49	34.079	1051.73	988.311	63.422	1000.22	947.062	53.153	1042.65	996.493
1083.7	1025.87	57.837	1078.42	1010.4	68.022	957.024	910.301	46.723	1066.85	974.302	92.547	872.518	869.376	3.142	1092.76	963.632	129.126	1075.7	975.955	99.743	967.579	918.917	48.662	1092.78	1034.59	58.197	924.814	938.739	-13.925	881.865	820.338	61.527	1059.86	1011.86	47.993	1076.73	1022.24	54.491	1076.87	1037.4	39.467	1050.69	988.13	62.565	999.76	953.821	45.939	1053.63	1001.01
1083.27	1017.55	65.719	1068.82	1007.22	61.598	954.558	911.399	43.159	1052.12	973.789	78.327	877.02	859.883	17.137	1084.84	967.445	117.397	1080.38	974.906	105.475	969.098	922.606	46.492	1082.34	1032.89	49.451	909.52	936.548	-27.028	868.337	820.677	47.66	1060.44	1008.85	51.599	1074.12	1020.37	53.752	1074.2	1036.33	37.879	1047.13	993.681	53.445	1005.08	947.99	57.085	1049.23	996.701
1072.72	1011.06	61.669	1077.95	1011.73	66.222	954.045	911.158	42.887	1060.76	971.721	89.038	882.147	865.138	17.009	1093.43	968.366	125.061	1074.35	973.024	101.329	965.589	919.157	46.432	1091.24	1034.88	56.357	915.874	940.294	-24.42	864.172	828.748	35.424	1051.65	1013.2	38.448	1070.27	1020.22	50.052	1081.56	1037.16	44.403	1054.32	993.462	60.854	1009.73	953.802	55.926	1051.11	1000.42
1071.87	1014.35	57.512	1075.92	1009.74	66.177	955.533	911.455	44.078	1041.19	968.46	72.726	870.018	862.571	7.447	1095.62	963.455	132.166	1075.83	976.675	99.157	964.823	918.43	46.393	1091.62	1030.3	61.324	913.301	939.692	-26.391	883.482	821.452	62.03	1047.86	1011.13	36.733	1073.98	1022.41	51.565	1078.47	1034.79	43.684	1054.11	991.947	62.164	1010.54	949.273	61.271	1052.2	999.519
1081.06	1016.37	64.682	1075.16	1016.38	58.779	960.409	912.602	47.807	1042.91	974.597	68.309	876.196	864.135	12.061	1091.99	962.349	129.646	1074.33	974.198	100.134	958.885	911.273	47.612	1079.59	1031.47	48.127	919.573	931.472	-11.899	884.832	824.005	60.827	1053.46	1008.77	44.688	1072.44	1016.32	56.124	1082.92	1038.28	44.641	1041.79	986.862	54.924	1010.99	949.8	61.193	1043.84	999.728
1081.22	1015.05	66.173	1073.39	1007.76	65.625	975.925	910.911	65.014	1050.31	975.616	74.693	872.001	863.753	8.248	1088.31	963.115	125.192	1075.05	971.928	103.12	962.888	916.816	46.072	1082.43	1037.99	44.445	931.528	937.556	-6.028	872.374	823.298	49.076	1049.7	1004.6	45.094	1064.95	1023.23	41.715	1088.52	1040.59	47.928	1030.69	985.26	45.435	1009.11	944.436	64.678	1036.24	998.403
1072.07	1015.91	56.158	1070.19	1006.96	63.231	976.587	910.142	66.445	1051.9	969.216	82.689	873.99	859.359	14.631	1083.07	960.446	122.626	1080.64	977.065	103.58	959.449	914.709	44.74	1090.73	1028.62	62.109	929.258	938.203	-8.945	885.16	821.01	64.15	1044.1	1007.85	36.248	1067.75	1021.68	46.069	1090.19	1035.94	54.249	1039.56	986.925	52.633	1006.26	949.129	57.135	1041.28	1000.02
1064.98	1006.81	58.172	1067.44	1006.17	61.269	975.687	910.683	65.004	1040.37	964.378	75.993	874.878	858.314	16.564	1081.86	963.738	118.121	1072.15	969.785	102.367	955.149	916.518	38.631	1082.13	1024.95	57.187	922.096	928.621	-6.525	883.121	821.075	62.046	1045.97	1006.65	39.326	1068.22	1016.17	52.048	1099.52	1032.86	66.661	1027.69	988.84	38.853	1012.46	946.681	65.783	1040.72	995.352
1095.27	1024.37	70.892	1084.73	1024.29	60.437	1003.78	927.103	76.675	1053.26	984.361	68.894	901.495	876.215	25.28	1088.1	979.675	108.424	1093.73	979.795	113.933	966.872	925.424	41.448	1099.98	1044.86	55.121	941.826	952.1	-10.274	898.193	834.225	63.968	1057.19	1015.89	41.292	1078.11	1032.79	45.323	1106.67	1050.63	56.036	1046.56	1001.71	44.853	1028.91	960.179	68.734	1067.83	1013.74
1094.62	1027.26	67.359	1070.61	1018.33	52.283	1019.32	919.706	99.613	1060.69	982.785	77.906	886.655	874.337	12.318	1091.11	973.966	117.144	1087.36	985.118	102.243	965.282	925.637	39.645	1086.38	1037.43	48.943	942.91	946.948	-4.038	896.396	835.938	60.458	1050.16	1018.74	31.415	1078.56	1028.52	50.045	1109.57	1040.1	69.471	1037.85	1005.08	32.767	1027.54	959.044	68.495	1063.43	1004.54
1087.08	1025.29	61.796	1073.32	1018.53	54.789	1025.83	921.415	104.416	1061.94	978.43	83.509	891.775	870.925	20.85	1087.9	971.028	116.876	1090.77	983.836	106.935	961.367	927.77	33.597	1089.52	1038.02	51.496	934.797	950.127	-15.33	892.974	833.225	59.749	1048.62	1018.18	30.433	1073.48	1027.34	46.135	1106.37	1042.13	64.235	1039.48	1001.88	37.601	1020.61	957.77	62.84	1062.36	1007.58
1078.21	1014.2	64.006	1055.47	1006.47	49.007	1021.86	909.015	112.842	1029.85	967.588	62.259	873.197	860.094	13.103	1064.92	962.282	102.641	1080.12	968.098	112.022	948.476	910.275	38.201	1060.88	1028.7	32.177	919.416	929.452	-10.036	881.771	815.936	65.835	1030.07	1002.32	27.755	1059.8	1014.68	45.12	1088.59	1030.3	58.298	1020.29	988.372	31.914	1013.3	944.64	68.657	1051.79	995.903
1076.61	1014.07	62.535	1063.48	1008.99	54.492	1045.47	911.925	133.546	1039.3	967.377	71.925	875.787	862.411	13.376	1071.46	961.67	109.792	1084.11	969.035	115.072	946.35	907.512	38.838	1064.71	1028.63	36.085	931.351	931.082	0.269	884.367	823.423	60.944	1033.81	1002.49	31.315	1057.03	1017.65	39.377	1098.66	1026.36	72.304	1022.7	984.077	38.62	1004.21	946.61	57.597	1050.3	993.244
1077.07	1011.87	65.193	1058.52	1010.27	48.249	1053.53	907.916	145.615	1033.49	969.028	64.462	870.933	857.165	13.768	1068.69	961.253	107.439	1087.06	971.834	115.222	942.498	913.822	28.676	1064.12	1024.5	39.622	916.781	929.214	-12.433	874.958	823.078	51.88	1031.68	1001.86	29.819	1060.32	1013.77	46.55	1093.41	1034.18	59.232	1015.76	984.044	31.713	1005.24	942.343	62.892	1052.88	998.494
1076.7	1014.58	62.118	1050.54	1009.88	40.663	1058.48	908.383	150.096	1026.33	968.746	57.583	873.368	858.684	14.684	1068.14	957.305	110.832	1083.04	965.532	117.506	941.283	913.192	28.091	1057.72	1027.98	29.732	919.818	926.67	-6.852	875.477	817.565	57.912	1033.8	997.75	36.047	1057.57	1018.79	38.777	1094.56	1029.75	64.811	1028.33	984.886	43.444	1007.66	946.361	61.303	1054.32	990.02
1067.7	1017.38	50.318	1055.4	1004.32	51.078	1068.9	907.924	160.978	1033.28	966.309	66.974	872.469	854.268	18.201	1075.87	957.862	118.009	1074.5	972.662	101.84	942.047	909.632	32.415	1063.56	1025.4	38.155	913.415	932.978	-19.563	874.544	817.736	56.808	1032.72	1000.35	32.372	1054.63	1015.21	39.421	1087.32	1030.7	56.616	1012.53	981.303	31.232	1007.9	944.336	63.562	1064.3	992.445
1073.97	1011.61	62.362	1062.36	1003.33	59.03	1061.79	906.75	155.037	1025.95	968.081	57.869	871.643	858.646	12.997	1078.72	960.857	117.863	1070.77	967.75	103.021	943.398	912.321	31.077	1055.76	1022.72	33.042	919.612	932.827	-13.215	874.628	817.302	57.326	1028.94	1002.96	25.976	1055.8	1014.28	41.524	1092.36	1027.94	64.424	1021.89	981.505	40.387	1004.62	942.453	62.164	1055.79	989.928
1068.78	1009.64	59.148	1054.76	1002	52.756	1065.59	910.765	154.827	1032.45	963.073	69.38	870.306	855.722	14.584	1066.49	962.249	104.24	1071.03	968.954	102.073	947.522	913.602	33.92	1059.23	1022.08	37.146	923.201	929.111	-5.91	869.803	822.171	47.632	1026.88	1000.25	26.63	1059.96	1013.8	46.155	1083.73	1033.2	50.529	1016.31	989.136	27.172	1001.42	936.198	65.226	1064.41	991.565
1076.68	1010.66	66.018	1060.96	1005.24	55.723	1076.14	908.05	168.093	1035.73	967.996	67.739	868.917	852.845	16.072	1060.44	958.118	102.322	1061.95	962.262	99.687	945.428	912.838	32.59	1060.52	1021.52	38.999	918.769	934.439	-15.67	868.529	816.75	51.779	1025.63	1006.28	19.349	1060.72	1014.53	46.184	1087.78	1030.08	57.698	1018.74	981.176	37.565	1004.36	944.327	60.033	1062.79	989.951
1076.73	1006.3	70.434	1052.18	1002.02	50.158	1066.11	909.211	156.901	1017.48	967.64	49.841	867.266	854.422	12.844	1062.01	956.293	105.714	1071.86	968.772	103.09	947.712	908.208	39.504	1054.14	1018.69	35.446	916.908	934.664	-17.756	876.641	819.839	56.802	1023.98	997.887	26.093	1063.78	1014.71	49.065	1083.91	1026.87	57.038	1001.93	984.382	17.551	1000.98	945.319	55.657	1077.02	986.269
1076.54	1005.11	71.433	1072.57	1002.38	70.195	1080.61	911.47	169.143	1017.42	965.554	51.87	866.011	853.964	12.047	1072.37	959.708	112.66	1055.28	962.638	92.646	952.399	910.289	42.11	1055.55	1020.5	35.053	914.963	930.354	-15.391	867.781	816.198	51.583	1026.12	995.119	30.999	1060.89	1011.22	49.678	1081.83	1028.97	52.857	1009.12	982.599	26.518	996.562	941.019	55.543	1077.09	987.993
1067.67	1003.65	64.015	1065.36	1004.19	61.172	1085.2	909.017	176.183	1023.36	962.016	61.348	866.748	855.865	10.883	1076.02	956.998	119.025	1067.92	960.755	107.167	962.211	903.848	58.363	1061.61	1018.31	43.303	912.584	930.233	-17.649	869.571	820.201	49.37	1027.2	999.42	27.781	1061.29	1012.17	49.116	1078.87	1026.72	52.156	1009.02	982.693	26.327	1004.78	943.066	61.715	1084.12	991.558
1072.19	1011.03	61.164	1065.04	1007.37	57.667	1089.21	908.535	180.677	1023.23	962.277	60.954	859.108	860.189	-1.081	1070.72	954.574	116.151	1057.56	966.34	91.223	970.97	910.188	60.782	1056.88	1016.22	40.667	913.528	928.027	-14.499	871.711	816.003	55.708	1029.21	999.079	30.133	1057.97	1011.31	46.665	1074.32	1025.4	48.919	1017.21	982.375	34.834	992.128	939.002	53.126	1085.41	992.732
1068.14	1007.28	60.857	1076.98	999.159	77.825	1072.22	905.815	166.408	1025.67	962.975	62.698	863.202	854.897	8.305	1063.79	958.969	104.819	1058.48	968.522	89.959	971.946	910.078	61.868	1060.4	1017.85	42.558	911.43	927.855	-16.425	868.718	814.49	54.228	1028.99	996.831	32.161	1061.41	1013.73	47.685	1073.79	1024.81	48.974	1011.04	976.326	34.718	987.029	941.696	45.333	1087.24	987.553
1068.69	1006.63	62.06	1079.85	1001.01	78.833	1078.77	910.45	168.324	1017.66	963.547	54.113	860.776	853.654	7.122	1071.3	959.478	111.82	1056.01	961.55	94.46	981.413	908.34	73.073	1070.36	1014.05	56.308	921.427	925.802	-4.375	861.286	815.439	45.847	1035.15	994.108	41.038	1063.47	1010.49	52.977	1072.47	1020.27	52.202	1013.08	984.59	28.491	995.684	940.417	55.267	1095.59	986.944
1073.17	1018.08	55.096	1101.24	1013.86	87.385	1075.04	924.451	150.593	1036.31	979.814	56.491	871.203	869.504	1.699	1087.14	969.52	117.616	1075.12	976.642	98.477	1001.66	919.708	81.952	1089.68	1032.01	57.671	920.076	941.309	-21.233	876.241	828.018	48.223	1048.02	1007.89	40.135	1077.94	1021.43	56.504	1085.33	1037.14	48.187	1027.57	991.772	35.796	1006.13	951.601	54.528	1108.11	1002.17
1064.12	1017.9	46.222	1093.06	1012.97	80.092	1064.67	913.133	151.533	1037.55	975.147	62.407	866.179	860.524	5.655	1077.57	963.936	113.632	1071.4	968.033	103.371	1004.25	921.941	82.308	1093.15	1030.9	62.256	930.815	942.984	-12.169	875.33	825.07	50.26	1046.15	1005.99	40.16	1076.56	1022.66	53.897	1077.27	1034.7	42.569	1030.6	994.215	36.384	1000.55	948.907	51.64	1105.81	994.392
1045.9	1007.35	38.551	1095.71	998.03	97.678	1058.27	905.798	152.472	1033.72	957.292	76.43	853.691	852.176	1.515	1060.82	955.451	105.369	1055.9	962.437	93.459	997.902	904.297	93.605	1083.24	1015.78	67.463	914.076	925.901	-11.825	862.761	811.645	51.116	1037.13	996.144	40.991	1060.63	1010.41	50.216	1063.51	1021.36	42.144	1018.73	978.422	40.308	988.714	932.518	56.196	1094.81	988.169
1044.37	1005.59	38.778	1087.54	1003.05	84.484	1049.61	905.178	144.433	1032.97	965.631	67.342	857.587	852.303	5.284	1055.58	954.622	100.962	1052.27	956.149	96.119	1005.83	908.699	97.129	1089.02	1013.76	75.26	912.951	921.168	-8.217	862.602	815.118	47.484	1033.76	1000	33.761	1062.81	1008.24	54.571	1062.04	1019.04	42.999	1011.8	975.023	36.778	985.206	938.264	46.942	1079.52	992.649
1047.32	1007.64	39.676	1087.36	997.174	90.181	1043.57	907.354	136.218	1029.48	961.922	67.558	849.475	851.71	-2.235	1053.4	955.503	97.899	1052.25	959.618	92.634	1014.65	906.114	108.534	1079.35	1014.15	65.192	913.516	922.882	-9.366	863.636	814.615	49.021	1039.87	993.402	46.465	1056.34	1008.43	47.915	1060.53	1021.63	38.905	1019.72	980.285	39.434	986.29	938.52	47.77	1091.04	984.297
1050.53	1007.68	42.852	1091.81	998.165	93.641	1036.37	901.567	134.8	1034.94	962.353	72.588	854.465	855.22	-0.755	1068.24	956.542	111.696	1052.66	961.688	90.97	1016.85	902.496	114.35	1069.88	1015.92	53.961	908.713	920.457	-11.744	869.485	811.409	58.076	1043.06	999.238	43.82	1056.1	1005.72	50.381	1059.57	1019.92	39.647	1009.61	976.461	33.147	982.72	935.224	47.496	1086.05	982.456
1054.82	1005.43	49.394	1111.85	1001.87	109.979	1021.86	905.404	116.454	1036.07	958.87	77.199	859.89	852.58	7.31	1071.28	949.222	122.06	1047.69	956.176	91.519	1009.5	904.277	105.226	1101.43	1013.19	88.24	912.89	924.896	-12.006	867.743	812.408	55.335	1047.83	994.894	52.935	1061.24	1006.87	54.369	1058.65	1022.36	36.292	1024.28	979.971	44.307	992.617	940.471	52.146	1071.99	980.301
1047.91	1005.09	42.824	1104.72	1001.21	103.503	1016.91	901.11	115.797	1044.45	957.461	86.987	855.744	851.69	4.054	1072.41	950.941	121.472	1049.35	956.907	92.446	999.954	900.567	99.387	1113.74	1012.95	100.786	909.001	927.242	-18.241	871.405	809.637	61.768	1046.51	993.747	52.762	1056.22	1010.65	45.574	1052.72	1023.37	29.35	1020.7	983.292	37.405	985.949	937.726	48.223	1068.33	988.664
1051.85	1002.24	49.608	1103.48	997.83	105.653	1003.89	902.437	101.454	1052.16	959.25	92.914	853.147	851.069	2.078	1061.78	952.98	108.8	1043.97	960.15	83.818	1012	902.654	109.346	1122.3	1011.86	110.442	915.532	922.804	-7.272	873.345	812.158	61.187	1044.03	993.331	50.7	1051	1005.12	45.88	1058.83	1022.38	36.445	1020.96	975.046	45.913	990.286	934.409	55.877	1070.08	982.828
1046.89	1005.89	40.995	1113.03	1001.11	111.921	996.614	903.675	92.939	1042.94	960.104	82.838	853.271	851.139	2.132	1067.64	947.238	120.402	1043.61	954.621	88.99	1021.21	900.768	120.441	1113.18	1013.5	99.678	911.801	924.842	-13.041	874.91	812.228	62.682	1038.32	995.863	42.452	1048.15	1009.85	38.299	1061.42	1023.53	37.892	1024.67	972.444	52.224	993.773	933.978	59.795	1070.2	980.422
1056.2	997.075	59.123	1113.38	996.007	117.376	990.219	902.939	87.28	1057.34	957.467	99.873	857.771	850.498	7.273	1067.33	951.333	115.994	1044.51	955.268	89.244	1028.53	903.637	124.896	1118.05	1010.01	108.044	909.352	924.102	-14.75	875.367	811.56	63.807	1040.61	992.571	48.042	1052.09	1003.13	48.961	1063.44	1018.39	45.047	1028.49	970.855	57.633	994.303	936.649	57.654	1050.32	981.672
1061.02	999.447	61.577	1086.69	994.75	91.939	993.456	898.115	95.341	1058.04	957.12	100.92	850.948	851.994	-1.046	1055.4	947.712	107.691	1044.53	956.364	88.164	1016.27	902.55	113.724	1124.15	1007.23	116.921	916.765	921.102	-4.337	884.859	808.991	75.868	1042.18	991.831	50.352	1058.77	1005.1	53.666	1068.56	1018.44	50.124	1025.87	970.574	55.296	998.107	935.788	62.319	1060.44	984.18
1058.01	1001.52	56.488	1105.73	995.382	110.352	987.835	903.525	84.31	1065.88	960.037	105.838	855.013	845.82	9.193	1046.65	947.105	99.548	1049.52	953.933	95.591	1012.47	899.398	113.067	1123.23	1006.44	116.791	910.758	922.014	-11.256	885.442	809.468	75.974	1035.68	994.626	41.053	1046.37	1001.63	44.736	1075.58	1020.93	54.649	1024.38	964.23	60.151	1002.58	934.925	67.65	1055.22	977.321
1069.46	1004.58	64.884	1091.57	993.208	98.363	976.085	903.821	72.264	1057.61	962.33	95.284	853.803	846.565	7.238	1043.18	946.412	96.765	1046.95	957.793	89.158	1017.18	899.412	117.768	1117.48	1014.81	102.668	917.318	917.998	-0.68	889.433	813.287	76.146	1035.75	990.559	45.193	1049.71	1001.11	48.6	1077.78	1020.09	57.691	1024.05	970.415	53.63	999.786	930.529	69.257	1046.57	983.313
1085.94	1000.92	85.017	1082.34	998.004	84.338	975.411	897.695	77.716	1065.88	956.791	109.088	856.557	847.343	9.214	1049.17	948.095	101.073	1054.18	952.873	101.311	1009.41	901.028	108.387	1120.78	1008.28	112.498	916.031	920.19	-4.159	884.166	814.541	69.625	1036.02	991.189	44.829	1048.95	1000.35	48.595	1083.38	1016.21	67.173	1028.85	968.59	60.264	991.605	935.308	56.297	1041.97	983.073
1090.38	994.05	96.329	1087.37	998.542	88.829	965.472	904.22	61.252	1057.85	959.417	98.43	851.556	849.5	2.056	1059.18	946.816	112.365	1048.08	956.341	91.737	1003.39	898.842	104.544	1105.43	1006.88	98.551	919.542	917.717	1.825	890.216	807.595	82.621	1034.76	992.858	41.9	1053.96	1000.22	53.739	1091.77	1015.18	76.589	1014.91	956.187	58.727	985.633	931.617	54.016	1047.69	978.628
1099.96	997.77	102.193	1084.15	992.123	92.03	965.553	899.239	66.314	1061.08	954.326	106.753	859.251	849.596	9.655	1064.15	946.036	118.116	1049.12	953.057	96.064	995.083	900.992	94.091	1095.93	1005.08	90.852	911.444	922.498	-11.054	891.662	812.607	79.055	1036.97	992.071	44.903	1044.9	1000.7	44.199	1087.27	1017.2	70.069	1016.03	959.11	56.922	994.98	932.726	62.254	1038.22	976.261
1113.36	1003.86	109.494	1076.18	997.547	78.636	953.857	900.899	52.958	1064.58	956.26	108.315	859.29	851.172	8.118	1040.37	948.038	92.336	1048.59	953.172	95.418	1000.29	897.345	102.946	1091.56	1007.58	83.986	915.987	919.439	-3.452	889.292	815.745	73.547	1024.63	989.304	35.331	1045.69	994.426	51.262	1089.98	1013.43	76.548	1002.7	963.054	39.646	992.322	929.515	62.807	1033.84	977.913
1133.22	1000.75	132.469	1075.78	995.963	79.815	952.235	903.772	48.463	1067.08	953.509	113.571	858.157	846.468	11.689	1035.23	946.766	88.46	1052.59	955.889	96.705	991.023	899.342	91.681	1094.59	1006.29	88.304	921.636	921.168	0.468	890.692	812.634	78.058	1029.3	989.801	39.498	1049.8	999.339	50.46	1095.63	1016.47	79.163	1014.82	962.141	52.678	990.699	932.803	57.896	1030.84	984.241
1152.2	997.558	154.64	1068.55	995.294	73.254	951.226	896.385	54.841	1060.1	958.875	101.221	860.008	848.939	11.069	1034.33	943.475	90.855	1047.44	953.154	94.283	982.822	900.862	81.96	1087.41	1003.29	84.122	913.201	917.45	-4.249	886.768	809.337	77.431	1026.52	991.249	35.267	1048.54	1001.96	46.587	1097.47	1013.14	84.333	1006.17	960.183	45.984	991.251	930.377	60.874	1032.37	975.224
1169.01	994.315	174.69	1053.75	995.575	58.176	952.84	901.871	50.969	1076.19	952.227	123.961	855.144	848.618	6.526	1033.83	944.374	89.459	1050.77	952.771	97.994	976.972	894.231	82.741	1084.61	1005.32	79.291	924.049	917.228	6.821	891.783	812.432	79.351	1022.24	986.729	35.507	1047.56	1001.2	46.359	1105.88	1015.95	89.931	1002.61	958.593	44.019	984.819	922.455	62.364	1034.21	975.983
1208.24	1000.08	208.161	1035.73	993.349	42.383	952.247	899.458	52.789	1066.27	955.816	110.454	859.944	848.089	11.855	1035.5	946.481	89.016	1051.04	946.452	104.592	967.133	900.312	66.821	1073.17	1000.1	73.075	922.858	913.559	9.299	887.782	807.872	79.91	1019.93	988.196	31.737	1050.19	1000.48	49.711	1105.54	1013	92.545	1004.96	961.216	43.748	985.858	927.693	58.165	1051.58	974.581
1227.97	986.995	240.977	1040.95	992.408	48.544	948.04	901.654	46.386	1056.45	951.625	104.826	856.256	847.88	8.376	1040.3	945.291	95.01	1047.69	946.5	101.194	970.409	894.001	76.408	1080.08	1003.03	77.052	923.123	915.746	7.377	882.666	811.654	71.012	1005.49	985.999	19.494	1051.81	993.821	57.985	1110.88	1011.54	99.335	997.21	962.791	34.419	986.232	929.06	57.172	1061.46	974.329
1217.26	993.872	223.387	1057.75	992.138	65.61	949.32	890.031	59.289	1061.66	950.581	111.077	857.862	845.735	12.127	1028.79	952.158	76.632	1054.83	951.226	103.605	963.532	897.15	66.382	1067.86	1003.59	64.271	923.728	916.346	7.382	881.35	808.621	72.729	1016.04	984.776	31.261	1059.7	996.817	62.879	1108.91	1007.65	101.259	999.448	959.116	40.332	991.931	929.851	62.08	1061.18	975.6
1243	997.541	245.46	1058.23	988.187	70.045	955.225	895.581	59.644	1059.79	953.758	106.029	854.844	850.948	3.896	1031.05	948.725	82.323	1060.61	953.833	106.774	961.988	896.262	65.726	1058.15	999.801	58.351	931.625	918.035	13.59	884.278	810.908	73.37	1006.72	983.604	23.112	1066.2	1002.71	63.489	1100.13	1014.63	85.495	1003.5	961.266	42.237	985.158	930.261	54.897	1096.96	974.338
1275.99	996.681	279.311	1044.24	987.835	56.41	961.571	897.054	64.517	1056.71	950.729	105.977	854.725	847.127	7.598	1036.01	940.96	95.046	1048.55	950.234	98.311	953.568	892.43	61.138	1049.94	1002.44	47.5	923.725	918.635	5.09	878.134	808.722	69.412	1014.17	986.505	27.664	1058.74	989.475	69.262	1105.52	1011.26	94.258	990.314	956.2	34.114	984.628	928.172	56.456	1106.27	973.141
1254.88	994.284	260.595	1050.57	993.462	57.105	952.826	897.461	55.365	1053.13	952.013	101.118	849.811	844.891	4.92	1033.74	937.002	96.737	1057.37	944.686	112.682	952.123	890.966	61.157	1055.09	998.228	56.866	925.297	913.162	12.135	876.026	810.71	65.316	1010.26	983.744	26.516	1072.6	996.362	76.238	1100.64	1008.84	91.799	998.106	958.232	39.874	984.883	927.635	57.248	1121.33	979.329
1293.57	993.913	299.654	1053.16	988.422	64.743	954.948	889.955	64.993	1041.26	956.315	84.947	851.104	844.411	6.693	1029.81	945.52	84.288	1049.46	947.752	101.713	949.408	892.777	56.631	1050.35	997.023	53.326	921.35	916.634	4.716	868.821	807.827	60.994	1013.18	980.119	33.065	1074.29	995.265	79.022	1094.54	1011.25	83.298	987.236	953.361	33.875	977.932	926.645	51.287	1157.56	973.54
1315.68	994.814	320.87	1047.41	988.727	58.687	968.077	896.499	71.578	1029.96	953.12	76.842	846.257	842.619	3.638	1030.61	944.32	86.292	1053.19	948.904	104.287	942.138	892.956	49.182	1040.74	996.498	44.24	925.673	913.534	12.139	868.377	807.038	61.339	1011.04	981.688	29.355	1077.27	989.058	88.21	1090.17	1012.71	77.456	1000.99	953.399	47.591	979.302	923.585	55.717	1180.94	977.448
1322.08	995.847	326.234	1056.28	985.837	70.44	961.702	891.392	70.31	1040.76	944.388	96.375	844.325	842.794	1.531	1026.73	942.568	84.167	1051.94	945.629	106.313	948.528	897.275	51.253	1042.5	1001.19	41.303	931.085	917.877	13.208	869.958	806.563	63.395	1016.11	980.478	35.633	1078.76	996.238	82.52	1085.84	1012.67	73.178	989.929	953.35	36.579	982.021	929.553	52.468	1192.88	978.585
1286.34	993.151	293.192	1063.08	991.805	71.277	965.456	893.854	71.602	1030.79	953.963	76.826	845.05	840.454	4.596	1050.07	942.221	107.851	1045.89	943.449	102.441	937.209	892.942	44.267	1044.65	1001.1	43.549	928.837	909.538	19.299	857.802	805.49	52.312	1016.85	982.28	34.566	1083.45	990.666	92.789	1090.39	1010.91	79.485	997.057	955.63	41.427	982.294	923.657	58.637	1199.93	975.101
1287.34	991.875	295.464	1048.68	987.615	61.061	963.546	897.045	66.501	1030.12	947.329	82.787	841.81	841.223	0.587	1040.22	938.724	101.499	1045.93	950.452	95.476	945.222	892.395	52.827	1043.38	996.908	46.47	926.098	911.725	14.373	865.878	804.003	61.875	1026.73	978.818	47.911	1083.33	991.212	92.115	1074.05	1014.81	59.24	1001.28	954.315	46.969	981.344	923.142	58.202	1227.18	974.406
1302.88	989.595	313.285	1069.43	986.958	82.47	964.914	893.127	71.787	1029.58	949.824	79.758	839.33	838.359	0.971	1038.83	939.172	99.662	1047.88	944.112	103.765	945.425	896.902	48.523	1039.65	994.027	45.626	923.539	910.599	12.94	859.328	801.175	58.153	1028.26	975.919	52.342	1079.83	991.802	88.029	1072.37	1010.11	62.26	1001.05	955.102	45.947	981.812	925.921	55.891	1236.72	975.842
1287.28	987.281	299.996	1081.54	988.858	92.682	968.787	890.106	78.681	1017.58	951.247	66.335	850.188	845.798	4.39	1053.75	941.826	111.925	1034.86	943.994	90.862	953.098	895.213	57.885	1053.05	993.982	59.066	924.872	906.935	17.937	860.263	805.144	55.119	1039.3	977.535	61.767	1085.29	994.667	90.625	1068.06	1007.19	60.862	1008.52	949.901	58.623	986.269	919.687	66.582	1238.52	972.026
1261.08	982.647	278.433	1083.57	986.625	96.942	968.039	895.629	72.41	1023.05	953.119	69.932	849.719	839.052	10.667	1057.35	937.325	120.028	1036.83	947.808	89.022	958.837	887.922	70.915	1061.37	993.777	67.596	923.25	909.138	14.112	861.253	802.795	58.458	1042.74	976.599	66.139	1077.14	989.125	88.019	1067.46	1005.76	61.698	1003.36	953.415	49.941	984.892	920.122	64.77	1259.23	972.741
1285.45	987.526	297.922	1109.69	983.955	125.733	969.068	898.058	71.01	1013.59	949.209	64.384	851.91	839.349	12.561	1059	936.828	122.168	1032.52	942.6	89.916	965.509	893.083	72.426	1065.95	993.024	72.928	914.361	904.917	9.444	858.84	801.871	56.969	1051.19	979.07	72.122	1074.37	990.699	83.668	1062.21	1008.62	53.593	1004.96	949.998	54.963	983.878	927.75	56.128	1298.93	971.944
1281.58	990.369	291.21	1121.91	983.357	138.551	969.175	888.608	80.567	1010.95	947.385	63.563	849.593	839.562	10.031	1055.53	940.577	114.951	1030.1	947.537	82.559	963.061	889.489	73.572	1062.01	996.432	65.578	910.542	909.073	1.469	864.336	807.348	56.988	1056.76	978.354	78.403	1075.5	987.66	87.841	1064.45	1008.31	56.141	1024.29	955.67	68.623	989.708	926.639	63.069	1316.22	965.732
1259.45	986.196	273.251	1116.14	987.74	128.396	967.424	893.76	73.664	1021.64	944.979	76.657	851.915	840.272	11.643	1049.4	939.538	109.865	1035.85	946.176	89.67	974.388	891.034	83.354	1094.41	996.359	98.051	910.483	907.818	2.665	859.458	805.071	54.387	1066.4	977.661	88.743	1073.43	981.447	91.982	1056.45	1006.42	50.026	1031.75	948.52	83.231	984.285	920.143	64.142	1308.64	971.944
1247.3	984.83	262.47	1135.49	982.272	153.222	958.55	888.368	70.182	1020.2	948.134	72.065	848.898	840.008	8.89	1048.27	939.669	108.6	1032.35	943.741	88.609	981.059	889.877	91.182	1125.78	993.483	132.293	918.858	908.304	10.554	861.066	802.704	58.362	1063.72	973.018	90.699	1068.19	989.481	78.706	1053.42	1007.2	46.224	1040.25	954.378	85.868	986.704	919.658	67.046	1322.23	972.768
1235.06	989.755	245.302	1134.59	985.073	149.513	959.346	890.138	69.208	1045.23	952.166	93.065	851.637	835.377	16.26	1052.09	942.034	110.055	1022.05	946.575	75.473	982.019	887.519	94.5	1131.36	994.977	136.38	915.087	904.381	10.706	864.491	803.279	61.212	1071.93	974.596	97.336	1069.92	983.175	86.746	1053.03	1001.19	51.846	1047.95	953.262	94.689	989.356	920.952	68.404	1310.04	968.147
1220.03	985.237	234.797	1150.67	984.132	166.538	956.365	892.629	63.736	1050.04	941.825	108.213	859.171	843.44	15.731	1054.52	936.238	118.284	1029.99	947.362	82.626	979.841	891.327	88.514	1138.47	992.448	146.018	909.832	906.809	3.023	863.196	804.483	58.713	1066.01	979.351	86.656	1062.01	985.082	76.93	1055.13	1005.44	49.691	1065.14	950.438	114.698	987.459	918.698	68.761	1288.24	977.78
1209.87	983.504	226.366	1143.3	988.371	154.925	953.284	892.04	61.244	1067.45	944.379	123.074	854.742	838.747	15.995	1049.16	937.618	111.544	1029.64	937.655	91.983	992.082	886.076	106.006	1145.66	988.638	157.027	906.846	908.529	-1.683	873.619	803.898	69.721	1072.24	970.902	101.343	1056.72	983.568	73.15	1044.34	1006.69	37.655	1072.55	950.731	121.815	982.429	915.931	66.498	1284.4	967.962
1176.44	981.849	194.59	1151.23	981.175	170.057	949.843	888.364	61.479	1088.29	946.382	141.906	856.904	838.412	18.492	1046.71	937.656	109.051	1035.67	942.487	93.181	990.592	885.618	104.974	1167.04	992.448	174.589	907.406	906.946	0.46	877.08	804.618	72.462	1075.27	974.252	101.016	1056.98	983.966	73.017	1053.64	997.301	56.336	1075.42	948.837	126.584	979.682	918.962	60.72	1267.34	973.206
1149.47	990.58	158.889	1142.66	985.138	157.524	949.069	885.332	63.737	1105.08	946.446	158.632	867.25	835.617	31.633	1043.28	933.124	110.154	1040.43	941.669	98.765	998.298	888.589	109.709	1166.38	991.951	174.434	902.69	905.928	-3.238	886.005	803.013	82.992	1041.92	969.083	72.842	1044.36	986.643	57.721	1052.47	996.294	56.175	1083.71	950.91	132.798	985.195	911.401	73.794	1266.84	971.535
1111.57	986.385	125.186	1142.53	985.26	157.267	945.889	891.186	54.703	1122.87	944.308	178.559	861.059	836.599	24.46	1037.2	933.938	103.262	1036.06	937.899	98.165	993.773	891.135	102.638	1161.15	989.064	172.083	909.18	906.15	3.03	889.872	802.932	86.94	1036.26	970.013	66.246	1051.07	981.631	69.438	1058.09	998.877	59.217	1087.18	951.447	135.737	986.344	915.235	71.109	1258.01	972.172
1084.21	983.256	100.957	1147.7	983.387	164.31	942.754	890.564	52.19	1139.87	942.619	197.251	860.952	831.047	29.905	1048.62	934.25	114.374	1055.11	943.238	111.869	996.378	888.212	108.166	1166.98	996.789	170.189	901.275	903.702	-2.427	894.011	801.862	92.149	1028.01	972.446	55.567	1047.22	983.269	63.948	1057.59	997.138	60.452	1091.92	946.567	145.358	981.246	913.603	67.643	1244.19	964.585
1148.88	987.305	161.573	1133.96	983.968	149.994	944.935	893.629	51.306	1166.59	947.329	219.265	866.228	832.73	33.498	1040.55	935.041	105.509	1066.33	942.965	123.369	988.562	890.759	97.803	1169.95	994.132	175.823	915.799	905.083	10.716	896.724	802.744	93.98	1020.14	968.134	52.005	1041.85	981.36	60.489	1065.59	1000.08	65.508	1087.53	950.494	137.037	987.859	916.759	71.1	1223.52	976.033
1169.83	979.57	190.263	1132.56	976.667	155.894	937.799	885.059	52.74	1193.56	941.21	252.348	867.45	837.808	29.642	1039.52	932.35	107.169	1085.39	940.222	145.167	998.519	888.359	110.16	1175.21	992.044	183.164	903.558	909.645	-6.087	903.67	803.868	99.802	1024.8	966.847	57.95	1039.78	981.547	58.237	1076.49	994.523	81.971	1086.51	943.496	143.009	987.897	917.302	70.595	1212.31	965.907
1134.32	981.544	152.775	1134.34	981.903	152.44	934.202	888.157	46.045	1210.72	947.851	262.871	860.124	836.173	23.951	1039.97	932.835	107.137	1092.05	945.609	146.441	987.937	887.639	100.298	1153.56	991.386	162.171	913.76	904.756	9.004	907.869	801.199	106.67	1019.16	968.783	50.373	1038.91	976.36	62.55	1080.39	997.731	82.659	1089.34	944.345	144.998	981.925	916.944	64.981	1212.08	969.815
1120.09	982.545	137.54	1124.03	983.164	140.869	931.517	884.023	47.494	1208.35	940.375	267.973	859.579	832.192	27.387	1032.26	937.027	95.237	1106.95	941.638	165.315	989.211	885.46	103.751	1161.06	993.163	167.894	915.488	906.592	8.896	916.501	802.088	114.413	1009.12	968.611	40.51	1040.92	977.329	63.588	1094.12	998.925	95.192	1088.69	945.914	142.772	970.424	908.541	61.883	1190.4	966.425
1112.19	977.616	134.575	1117.47	986.854	130.613	932.586	887.822	44.764	1227.71	944.935	282.775	864.113	831.534	32.579	1031.45	932.084	99.365	1117.84	938.754	179.085	988.002	888.605	99.397	1165.12	985.844	179.276	928.308	899.746	28.562	923.917	803.833	120.084	1048.46	965.035	83.429	1029.18	978.045	51.131	1083.46	996.975	86.488	1096.57	941.465	155.108	972.507	913.648	58.859	1178.27	966.265
1115.01	983.603	131.408	1112.69	990.212	122.475	931.137	885.593	45.544	1241.03	944.019	297.014	860.803	834.706	26.097	1035.74	934.624	101.114	1135.46	942.963	192.496	985.879	886.632	99.247	1161.65	990.358	171.293	927.029	905.591	21.438	920.557	798.154	122.403	1041.71	965.369	76.345	1033.78	978.677	55.103	1096.64	996.51	100.134	1091.5	943.624	147.873	970.679	916.461	54.218	1167.84	970.756
1111.73	981.464	130.271	1110.57	979.066	131.499	921.909	884.456	37.453	1246.78	945.889	300.892	857.013	835.488	21.525	1032.31	932.566	99.739	1140.03	941.465	198.569	980.639	889.377	91.262	1164.44	983.947	180.489	942.226	905.548	36.678	924.355	803.442	120.913	1034.04	966.6	67.44	1038.23	976.753	61.48	1101.84	995.609	106.228	1081.47	943.068	138.404	964.383	911.472	52.911	1152.72	975.533
1166.71	981.503	185.203	1100.39	978.873	121.518	935.211	889.589	45.622	1264.55	944.113	320.439	856.371	836.58	19.791	1041.94	932.644	109.297	1154.79	944.907	209.887	967.512	887.742	79.77	1157.9	985.495	172.407	945.697	898.175	47.522	923.628	800.676	122.952	1024.82	966.742	58.074	1037.78	976.009	61.772	1099.53	997.803	101.728	1076.71	942.16	134.553	965.827	912.6	53.227	1136.46	975.418
1168.16	984.942	183.223	1094.64	982.608	112.037	942.173	890.208	51.965	1263.33	944.716	318.611	854.737	832.082	22.655	1028.83	932.402	96.426	1157.57	935.438	222.136	965.068	887.202	77.866	1135.86	987.384	148.477	953.697	903.533	50.164	927.383	804.206	123.177	1020	966.467	53.535	1037.22	977.72	59.497	1117.84	996.669	121.174	1075.03	943.994	131.034	971.128	914.926	56.202	1119.47	977.128
1189.75	980.503	209.245	1081.74	979.194	102.545	940.427	888.346	52.081	1279.11	950.527	328.579	844.957	835.394	9.563	1037.62	933.919	103.697	1166.38	940.087	226.293	969.818	891.373	78.445	1125.06	984.509	140.547	971.722	902.596	69.126	920.928	800.221	120.707	1010.83	966.711	44.12	1042.29	977.071	65.219	1121.75	999.09	122.662	1065.28	943.006	122.277	959.804	911.246	48.558	1116.76	973.624
1209.11	987.807	221.3	1081.58	983.784	97.791	941.023	885.715	55.308	1293.33	946.035	347.296	846.684	831.222	15.462	1042.13	931.521	110.611	1176.43	936.999	239.429	960.812	886.972	73.84	1137.1	988.252	148.847	972.677	902.771	69.906	923.319	801.024	122.295	998.623	959.377	39.246	1040.59	972.894	67.691	1128.08	996.484	131.593	1058.34	942.13	116.208	956.136	917.588	38.548	1116.07	973.499
1271	985.109	285.888	1084.88	988.109	96.775	948.696	891.443	57.253	1285.79	943.43	342.359	835.063	836.822	-1.759	1060.03	931.027	129.004	1179.06	939.782	239.273	958.743	889.734	69.009	1124.89	989.82	135.07	977.332	905.977	71.355	915.863	801.894	113.969	999.486	960.522	38.964	1048.35	977.537	70.808	1126.07	997.136	128.93	1042.99	943.256	99.737	961.432	913.832	47.6	1101.56	970.37
1300.14	988.248	311.889	1079.94	983.381	96.557	961.624	886.934	74.69	1293.51	946.25	347.259	835.137	832.982	2.155	1063.27	933.671	129.601	1183.93	934.569	249.363	948.481	889.956	58.525	1116.11	990.298	125.81	980.816	901.664	79.152	919.122	799.169	119.953	1002.91	965.449	37.466	1061.69	980.167	81.522	1131.66	995.787	135.871	1038.38	946.127	92.249	958.506	911.771	46.735	1094.61	973.512
1260.29	987.079	273.211	1073.8	985.657	88.146	971.536	893.558	77.978	1284.88	946.137	338.744	834.437	835.16	-0.723	1062.17	931.911	130.262	1178.64	940.633	238.009	950.268	887.139	63.129	1107.31	989.306	117.999	983.196	900.008	83.188	910.193	805.039	105.154	1007.84	966.352	41.489	1064.5	978.137	86.367	1116.85	996.878	119.974	1016.86	937.978	78.881	962.201	915.389	46.812	1093.59	976.881
1289.72	987.529	302.196	1069.17	990.633	78.541	986.68	884.818	101.862	1273.51	944.912	328.596	840.416	837.386	3.03	1066.66	930.981	135.677	1184.25	941.127	243.12	944.632	889.615	55.017	1103.85	986.853	116.993	998.363	898.628	99.735	914.971	802.696	112.275	998.341	964.124	34.217	1071.9	977.46	94.439	1129.87	995.513	134.361	1016.72	944.443	72.276	963.806	910.764	53.042	1089.01	975.284
1346.48	984.154	362.328	1067.03	989.198	77.827	999.704	888.599	111.105	1247.94	949.318	298.626	836.46	831.445	5.015	1056.88	928.065	128.82	1175.34	942.142	233.202	940.698	888.944	51.754	1095.36	989.141	106.221	986.228	903.997	82.231	904.322	801.652	102.67	998.518	966.658	31.86	1076.57	975.281	101.286	1125.66	1001.04	124.619	1045.52	940.69	104.828	975.783	909.847	65.936	1105.46	978.931
1406.58	985.343	421.237	1068.16	981.731	86.432	1017.53	885.199	132.334	1264.28	949.521	314.754	829.087	831.784	-2.697	1046.18	927.022	119.157	1168.21	939.256	228.953	941.353	887.237	54.116	1082.28	989.885	92.398	1019.01	896.7	122.314	899.631	803.218	96.413	1000.78	962.955	37.829	1086.29	974.652	111.635	1118.48	998.11	120.369	1040.77	940.789	99.977	977.997	914.808	63.189	1117.95	977.462
1446.77	992.542	454.232	1061.44	989.52	71.918	1025.37	890.781	134.585	1256.39	947.144	309.25	825.506	829.83	-4.324	1046.04	930.265	115.777	1156.72	941.12	215.598	939.948	887.367	52.581	1070.14	987.095	83.042	1025	899.25	125.753	896.11	805.853	90.257	1000.53	966.341	34.185	1097.81	979.113	118.693	1112.35	998.178	114.17	1040.92	941.985	98.932	983.637	911.427	72.21	1127.26	972.726
1437.16	985.011	452.147	1066.47	989.47	76.997	1037.43	891.08	146.347	1234.91	951.067	283.845	835.663	834.192	1.471	1093.56	932.25	161.312	1167.65	938.431	229.222	935.734	889.572	46.162	1065.47	991.335	74.136	998.029	901.387	96.642	893.095	802.972	90.123	1002.61	965.703	36.904	1098.73	980.817	117.916	1105.28	1000.15	105.129	1051.56	939.188	112.374	1028.71	913.962	114.751	1142.4	977.374
1414.71	987.98	426.731	1088.74	982.916	105.821	1053.32	894.296	159.025	1230.54	946.559	283.984	834.208	832.664	1.544	1096.68	933.068	163.609	1153.64	940.604	213.034	935.654	890.742	44.912	1060.53	990.692	69.837	996.417	902.262	94.155	885	801.767	83.233	997.952	961.84	36.112	1105.44	973.619	131.823	1100.35	998.296	102.053	1051.08	939.562	111.518	1027.19	914.686	112.509	1156.12	973.643
1746.09	987.206	758.881	1094.56	991.956	102.606	1065.41	893.51	171.905	1217.59	947.412	270.176	836.774	830.198	6.576	1089.4	931.068	158.334	1146.12	942.791	203.334	938.193	891.691	46.502	1059.07	988.386	70.686	989.109	901.689	87.42	890.114	801.628	88.486	1002.24	961.74	40.503	1104.09	978.851	125.242	1098.41	1001.62	96.789	1069.81	940.768	129.037	1040.77	912.366	128.405	1168.55	981.494
1750.45	990.389	760.065	1113.97	990.76	123.212	1079.25	893.943	185.309	1211.61	949.307	262.306	840.622	830.44	10.182	1099.04	931.653	167.39	1130.17	944.608	185.564	942.902	892.442	50.46	1056.66	995.41	61.248	1013.3	904.318	108.984	880.681	801.778	78.903	1008.43	960.928	47.505	1108.52	976.385	132.132	1096.45	998.428	98.027	1079.02	940.859	138.162	1053.63	917.614	136.017	1175.29	976.93
1800.19	991.38	808.812	1121.67	995.048	126.62	1080.46	893.535	186.93	1205.6	950.69	254.908	836.537	830.386	6.151	1082.37	929.259	153.109	1121.97	937.15	184.823	939.633	891.736	47.897	1054.19	991.808	62.38	990.344	909.25	81.094	877.059	805.288	71.771	1004.72	963.241	41.48	1106.56	974.713	131.85	1089.72	996.001	93.72	1102.6	940.733	161.862	1051.7	913.033	138.669	1197.68	973.587
1801.19	987.885	813.302	1131.39	986.979	144.415	1090.22	889.888	200.336	1181.3	946.39	234.907	836.488	834.748	1.74	1084.99	929.842	155.15	1114.89	944.613	170.275	951.201	890.748	60.453	1057.19	993.4	63.795	976.364	903.046	73.318	873.947	798.677	75.27	1015.94	963.458	52.482	1117.16	977.413	139.745	1093.02	999.553	93.471	1130.33	942.727	187.604	1065.89	913.744	152.148	1196.32	979.274
1796.88	984.415	812.464	1127.33	988	139.326	1090.28	891.922	198.353	1182.1	943.882	238.222	841.564	832.25	9.314	1077.47	934.993	142.482	1112.08	941.381	170.701	956.292	893.245	63.047	1057.11	990.506	66.605	1003.98	902.764	101.214	870.583	801.894	68.689	1028.97	964.615	64.351	1114.16	976.825	137.332	1088.5	990.784	97.712	1175.7	943.303	232.398	1065.37	917.058	148.312	1206.64	981.514
1829.26	990.553	838.709	1080.41	991.968	88.447	1093.63	894.936	198.695	1162.57	947.898	214.672	844.525	829.304	15.221	1070.71	934.488	136.227	1091.74	940.922	150.823	963.578	893.246	70.332	1070.01	992.698	77.309	983.847	901.383	82.464	875.222	804.064	71.158	1027.24	966.018	61.219	1111.83	974.404	137.427	1076.74	995.09	81.653	1225.3	944.268	281.034	1087.25	916.39	170.863	1217.43	976.651
1826.36	991.723	834.641	1115.35	992.991	122.357	1088.15	892.438	195.716	1157.37	947.052	210.322	848.394	832.927	15.467	1077.65	932.075	145.573	1070.2	942.914	127.29	972.6	892.564	80.036	1075.17	996.98	78.186	988.308	903.683	84.625	880.38	804.425	75.955	1047.03	968.734	78.3	1107.6	980.517	127.086	1071.71	1002.67	69.036	1278.06	948.133	329.923	1076.58	916.549	160.029	1214.68	974.882
1824	988.621	835.383	1169.99	982.989	186.999	1079.72	894.471	185.25	1136.5	947.658	188.844	853.093	837.598	15.495	1066.17	931.802	134.37	1060.24	941.329	118.913	985.985	887.21	98.775	1091.24	988.92	102.319	977.54	907.283	70.257	868.543	804.106	64.437	1056.44	962.921	93.523	1101.89	975.267	126.622	1067.89	998.421	69.469	1327.32	943.007	384.314	1077.76	910.869	166.889	1213.28	971.214
1825.65	989.725	835.929	1220.77	994.459	226.306	1087.3	891.916	195.384	1128.66	946.014	182.646	856.128	834.617	21.511	1066.11	931.358	134.749	1065.9	939.259	126.639	996.218	888.139	108.079	1105.18	990.572	114.605	974.64	906.122	68.518	869.912	807.656	62.256	1067.12	962.156	104.965	1099.7	974.937	124.764	1062.29	999.889	62.402	1394.56	942.199	452.364	1079.3	919.374	159.922	1209.07	972.19
1744.41	994.352	750.058	1287.72	990.759	296.962	1081.54	892.759	188.78	1121.54	948.085	173.451	857.742	833.663	24.079	1057.39	934.626	122.76	1064.27	945.496	118.771	996.131	889.998	106.133	1113.58	985.26	128.316	962.255	904.195	58.06	866.687	805.447	61.24	1054.87	968.579	86.291	1101.62	976.435	125.186	1055.22	997.43	57.786	1448.09	944.195	503.898	1081.41	914.942	166.473	1213.64	978.612
1728.44	985.525	742.911	1324.61	988.552	336.057	1066.35	889.625	176.728	1106.83	943.429	163.404	857.494	833.209	24.285	1047.55	931.224	116.327	1053.31	939.433	113.875	1005.17	890.002	115.164	1115.82	994.465	121.357	967.169	905.358	61.811	874.01	804.858	69.152	1059.52	967.06	92.458	1098.64	972.998	125.646	1051.91	997.637	54.273	1500.35	940.244	560.102	1083.74	917.643	166.095	1198.65	977.94
1734.81	983.795	751.011	1326.53	993.215	333.311	1068.53	889.274	179.26	1102.64	949.515	153.123	859.487	835.388	24.099	1043.4	933.294	110.106	1053.15	943.465	109.683	1017.8	891.785	126.013	1113.27	992.825	120.449	958.825	899.069	59.756	874.375	801.738	72.637	1061.66	965.955	95.708	1094.81	971.863	122.944	1055.28	1001.54	53.732	1588.51	944.448	644.066	1077.88	915.026	162.85	1194.39	973.441
1750.84	982.934	767.905	1334.53	995.778	338.756	1064.12	896.91	167.215	1089.36	950.181	139.183	866.331	832.911	33.42	1035.15	927.805	107.348	1048.24	937.385	110.852	1023.71	894.064	129.647	1114.66	996.094	118.563	959.76	904.613	55.147	875.769	802.637	73.132	1066.93	964.339	102.596	1088.51	974.768	113.744	1047.08	995.471	51.609	1615.43	944.237	671.194	1070.06	910.478	159.585	1194.27	975.719
1740.49	986.928	753.561	1307.29	993.058	314.228	1049.39	889.038	160.349	1089.83	948.653	141.175	868.415	833.579	34.836	1033.47	936.078	97.394	1036.34	941.67	94.673	1026.22	889.597	136.624	1140.54	988.103	152.435	964.653	901.845	62.808	884.964	800.411	84.553	1062.26	966.107	96.156	1085.61	973.762	111.851	1040.05	997.762	42.283	1663.21	942.073	721.134	1067.96	914.684	153.274	1181.51	974.545
1651.04	984.495	666.54	1305.78	989.853	315.924	1045.04	890.92	154.115	1077.28	954.47	122.813	868.36	835.177	33.183	1034.52	928.215	106.301	1035.75	942.965	92.786	1027.9	886.166	141.739	1141.63	989.302	152.327	957.955	905.403	52.552	891.031	801.893	89.138	1057.36	964.17	93.192	1080.02	975.606	104.415	1037.47	997.173	40.3	1688.34	940.27	748.065	1067.31	912.642	154.667	1174.18	976.694
1639.07	985.962	653.112	1317.52	988.691	328.824	1030.99	895.052	135.938	1065.41	948.291	117.116	866.771	830.079	36.692	1028.52	929.702	98.816	1036.5	940.616	95.888	1033.28	891.952	141.326	1135.54	991.698	143.842	958.437	904.164	54.273	896.516	803.921	92.595	1056.92	964.497	92.419	1075.77	974.981	100.786	1036.82	1000.01	36.816	1739.71	940.239	799.469	1063.33	918.527	144.799	1167.63	974.986
1605.98	986.871	619.11	1322.56	993.167	329.391	1027.6	892.224	135.372	1055.51	943.526	111.98	862.079	831.314	30.765	1023.93	927.522	96.413	1037.16	941.124	96.038	1027.2	891.31	135.888	1128.01	987.854	140.156	947.196	903.163	44.033	904.572	804.345	100.227	1049.77	967.131	82.636	1068.59	976.518	92.069	1030.87	996.421	34.446	1781.68	939.013	842.669	1054.52	913.24	141.284	1149.17	980.342
1443.63	986.414	457.214	1318.68	989.057	329.62	1024.11	892.441	131.67	1055.15	943.793	111.356	868.296	834.1	34.196	1042.2	930.467	111.736	1039.88	939.598	100.282	1030.58	889.183	141.401	1136.14	990.254	145.884	945.096	899.908	45.188	908.801	804.471	104.33	1052.74	966.974	85.768	1072.18	976.5	95.685	1034.4	994.808	39.595	1786.77	940.606	846.164	1048.22	910.399	137.823	1141.21	975.999
1218.79	985.84	232.954	1297.7	987.709	309.99	1008.44	887.844	120.595	1064.96	942.04	122.918	860.941	837.709	23.232	1042.16	931.332	110.83	1035.03	939.124	95.909	1030.68	889.206	141.475	1130.22	993.648	136.57	936.438	901.982	34.456	919.455	806.635	112.82	1031.2	966.364	64.832	1061.81	972.119	89.687	1035.82	995.82	39.999	1813.1	943.375	869.726	1048.4	908.276	140.123	1134.24	979.705
1584.24	987.713	596.53	1291.32	991.48	299.841	1008.48	893.271	115.207	1043.67	946.632	97.04	861.329	834.043	27.286	1055.34	935.548	119.793	1038.86	944.565	94.299	1022.41	887.108	135.304	1140.89	995.468	145.426	939.278	901.718	37.56	920.133	802.813	117.32	1005.84	966.217	39.618	1055.89	975.849	80.038	1042.1	992.629	49.473	1821.12	944.516	876.605	1036.81	916.121	120.693	1125.27	978.131
1543.57	987.174	556.391	1272.96	988.049	284.91	1001.07	890.913	110.155	1050.66	945.814	104.846	858.847	832.851	25.996	1031.49	932.132	99.359	1039.58	944.555	95.023	1026.52	891.838	134.68	1137.11	993.418	143.69	937.636	901.798	35.838	929.812	801.645	128.167	1004.61	964.622	39.992	1056.6	976.406	80.189	1034.06	998.956	35.099	1775.66	945.383	830.279	1023.95	915.246	108.707	1118.98	980.978
1494.83	984.769	510.058	1263.62	987.047	276.573	995.05	887.275	107.775	1060.77	947.978	112.791	855.727	829.978	25.749	1027.43	924.647	102.786	1050.59	940.862	109.729	1013.03	893.625	119.403	1125.17	991.576	133.596	946.473	905.348	41.125	938.27	801.803	136.467	1000.98	963.073	37.906	1052	976.452	75.547	1043.41	998.186	45.22	1740.24	943.262	796.981	1028.62	917.399	111.225	1107.61	982.438
1488.58	993.041	495.54	1243.64	987.075	256.568	983.492	894.431	89.061	1073.76	943.631	130.128	853.408	828.132	25.276	1061.98	931.605	130.374	1063.82	943.918	119.899	1008.48	891.311	117.164	1127.14	990.007	137.131	940.636	899.825	40.811	941.875	801.812	140.063	997.751	960.148	37.603	1051.75	978.476	73.277	1044.61	995.835	48.775	1751.58	942.726	808.851	1021.61	918.75	102.855	1092.23	973.526
1473.51	988.138	485.373	1217.19	983.543	233.65	982.481	890.562	91.919	1073.41	946.309	127.099	852.27	835.133	17.137	1066.91	932.143	134.768	1066.65	938.619	128.032	1008.37	887.651	120.72	1101.95	994.931	107.017	940.361	902.323	38.038	944.23	800.789	143.441	991.076	961.774	29.302	1045.17	978.556	66.614	1049.25	997.309	51.943	1711.37	946.382	764.988	1011.55	917.008	94.54	1086.62	981.63
1427.42	990.253	437.172	1236.19	985.881	250.314	972.28	887.236	85.044	1097.43	945.767	151.66	844.736	837.069	7.667	1096.39	932.893	163.495	1105.19	943.944	161.247	1002.36	889.446	112.912	1093.19	993.058	100.136	958.909	900.687	58.222	944.88	803.199	141.681	996.52	960.459	36.061	1043.84	978.248	65.592	1055.22	1001.08	54.142	1730.77	938.523	792.248	1010.87	912.819	98.048	1076.61	978.579
1382.11	994.021	388.087	1213.45	987.345	226.106	964.958	891.85	73.108	1102.83	942.892	159.938	846.827	833.039	13.788	1090.37	932.921	157.453	1117.25	942.481	174.772	991.579	885.109	106.47	1094.37	989.784	104.581	974.883	898.394	76.489	955.995	802.508	153.487	990.585	958.732	31.853	1041.67	977.715	63.958	1059.93	999.86	60.075	1739.3	945.989	793.314	1000.66	912.642	88.019	1070.54	981.811
1372.31	993.104	379.209	1211.94	992.548	219.394	956.19	891.967	64.223	1099.23	937.81	161.425	846.469	832.381	14.088	1116.76	937.479	179.28	1137.51	946.389	191.123	993.619	884.982	108.637	1085.73	988.035	97.697	990.257	901.229	89.028	956.062	800.575	155.487	992.794	961.144	31.65	1046.21	974.127	72.079	1056.89	1003.24	53.654	1713.18	942.118	771.062	1005.22	913.8	91.419	1056.67	981.931
1393.65	997.67	395.977	1197.97	989.048	208.918	953.486	894.118	59.368	1128.98	945.713	183.269	834.007	830.245	3.762	1128.94	929.232	199.705	1147.67	941.129	206.537	986.039	888.475	97.564	1077.96	996.311	81.646	993.935	897.84	96.095	953.709	806.269	147.44	985.806	958.885	26.921	1046.02	976.298	69.724	1067.64	997.694	69.947	1687.52	943.595	743.923	1002.67	915.63	87.042	1054.38	979.291
1390.99	990.392	400.595	1181.56	992.369	189.192	945.905	892.675	53.23	1157.13	943.917	213.214	839.01	829.442	9.568	1128.88	932.973	195.907	1155.4	940.864	214.533	978.057	892.89	85.167	1071.05	991.492	79.556	1003.04	902.148	100.892	950.361	805.003	145.358	991.499	961.322	30.177	1046.42	974.571	71.846	1066.3	996.57	69.728	1663	941.74	721.259	991.149	914.785	76.364	1051.89	973.223
1358.72	994.721	363.999	1161.39	988.187	173.199	941.338	892.607	48.731	1167.48	944.304	223.175	840.002	833.382	6.62	1138.41	931.026	207.382	1163.34	941.259	222.076	975.493	886.831	88.662	1057.38	988.322	69.053	995.811	898.218	97.593	954.549	799.738	154.811	979.244	957.634	21.61	1048.17	974.253	73.913	1065.26	999.423	65.833	1642.65	942.528	700.12	997.012	913.344	83.668	1034.49	977.324
1347.67	989.002	358.67	1178.74	991.868	186.874	943.249	888.595	54.654	1187.61	944.754	242.856	835.923	833.607	2.316	1159.32	933.208	226.116	1174.34	938.597	235.738	968.686	885.328	83.358	1063.53	992.534	70.998	1013.91	899.254	114.659	944.868	806.515	138.353	973.568	958.028	15.54	1056.39	976.953	79.435	1070.36	1002.14	68.214	1615.51	945.103	670.409	991.156	911.881	79.275	1043.52	979.246
1318.98	996.788	322.194	1182.98	991.418	191.567	941.23	893.688	47.542	1208.2	943.481	264.723	830.995	834.879	-3.884	1152.62	931.602	221.017	1173.85	941.307	232.543	966.095	885.357	80.738	1049.87	997.108	52.763	1009.21	902.242	106.969	921.276	802.078	119.198	973.757	961.638	12.119	1062.76	973.494	89.264	1068.72	1001.24	67.477	1588.8	942.262	646.542	1000.38	914.916	85.469	1047.56	981.997
1262.79	996.79	265.996	1158.75	989.725	169.023	935.148	890.569	44.579	1239.59	946.898	292.692	828.553	833.254	-4.701	1108.61	926.903	181.708	1178.24	937.107	241.137	954.9	886.664	68.236	1032.01	993.254	38.755	1010.69	904.812	105.875	912.875	800.432	112.443	973.924	955.465	18.459	1062.54	970.892	91.652	1069.16	999.516	69.649	1565.06	946.021	619.042	999.772	916.036	83.736	1044.77	974.604
1279.7	994.277	285.421	1143.41	989.213	154.197	934.327	888.94	45.387	1240.16	945.391	294.767	828.224	835.384	-7.16	1092.3	928.389	163.914	1188.65	943.706	244.941	952.814	889.535	63.279	1017.88	994.513	23.37	1025.73	900.995	124.74	915.015	810.613	104.402	972.051	958.898	13.153	1068.86	969.645	99.218	1073.44	995.678	77.758	1534.38	946.746	587.629	1012.49	915.34	97.148	1052.24	978.823
1287.52	991.792	295.728	1140.74	987.203	153.534	930.547	891.374	39.173	1240.28	944.855	295.424	832.794	832.933	-0.139	1090.69	929.494	161.198	1182.21	942.974	239.241	950.751	884.52	66.231	1024.04	992.942	31.094	1033.08	899.019	134.065	917.231	798.411	118.82	975.54	957.123	18.417	1076.17	973.963	102.205	1068.47	1001.2	67.273	1511.83	945.404	566.422	1007.68	913.784	93.895	1052.11	978.358
1259.85	993.063	266.784	1127.87	990.71	137.158	931.059	892.51	38.549	1255.72	944.715	311.006	833.928	833.165	0.763	1095.95	927.364	168.583	1188.15	938.333	249.816	946.679	882.366	64.313	1018.23	989.97	28.261	1036.18	899.13	137.048	912.165	804.502	107.663	970.394	956.609	13.785	1074.93	973.978	100.956	1074.09	998.389	75.699	1501.3	945.706	555.592	1020.38	918.131	102.254	1058.96	971.594
1272.07	995.728	276.341	1112.77	992.078	120.695	927.969	892.972	34.997	1274.37	942.485	331.888	830.375	832.933	-2.558	1096.62	930.23	166.389	1181.06	934.822	246.236	937.332	888.192	49.14	1017.53	989.947	27.583	1040.17	898.139	142.029	902.301	802.364	99.937	968.427	957.287	11.14	1073.62	972.758	100.863	1061.68	996.933	64.751	1486.96	944.697	542.261	1037.16	913.073	124.083	1066.12	975.932
1284.54	995.781	288.76	1085.76	990.572	95.189	921.426	891.45	29.976	1285.11	945.697	339.41	831.506	831.685	-0.179	1109.7	924.287	185.416	1162.48	937.555	224.925	940.14	881.953	58.187	1011.11	992.862	18.251	1036.62	898.501	138.117	901.564	804.378	97.186	980.426	953.806	26.62	1087.42	976.797	110.627	1066.5	998.81	67.688	1453.42	947.869	505.548	1043.01	917.246	125.765	1070.08	980.082
1297.02	990.504	306.512	1070.37	989.647	80.723	929.221	887.997	41.224	1264.69	945.621	319.072	832.643	832.938	-0.295	1104.71	926.378	178.333	1179.05	939.404	239.643	941.294	887.646	53.648	1014.58	994.6	19.978	1032.95	902.168	130.786	893.849	803.988	89.861	973.281	957.478	15.803	1093.04	972.751	120.293	1062.2	998.377	63.826	1416.76	942.258	474.502	1046.89	917.066	129.821	1056.11	979.464
1329.02	993.19	335.83	1070.32	991.927	78.389	921.533	894.668	26.865	1250.28	947.215	303.063	843.469	836.093	7.376	1107.34	927.322	180.02	1160.82	936.271	224.549	938.261	885.495	52.766	1011.92	993.608	18.308	1039.08	899.382	139.699	879.096	798.481	80.615	978.848	952.756	26.092	1096.75	975.38	121.369	1061.07	999.38	61.686	1414.87	945.812	469.062	1055.94	914.505	141.432	1051.6	978.165
1308.02	992.598	315.417	1069.14	991.254	77.882	922.355	890.627	31.728	1251.09	942.167	308.924	841.39	831.348	10.042	1099.74	930.012	169.727	1158.28	941.872	216.404	937.807	887.527	50.28	1008.51	991.851	16.663	1018.38	895.891	122.494	882.398	801.138	81.26	983.013	953.257	29.756	1103.34	973.769	129.571	1054.97	998.283	56.683	1377.96	947.004	430.958	1067.68	914.735	152.943	1050.33	979.736
1237.67	997.778	239.891	1065.65	991.062	74.587	919.912	895.381	24.531	1258.47	949.655	308.819	846.81	834.935	11.875	1100.59	927.088	173.502	1145.47	940.856	204.616	946.417	887.85	58.567	1002.83	996.318	6.511	1028.52	902.072	126.446	900.193	802.622	97.571	985.715	954.138	31.577	1113.96	975.171	138.791	1061.29	1002.34	58.947	1347.92	946.625	401.292	1060.68	921.829	138.848	1072.74	976.922
1358.26	992.257	365.998	1126.58	992.072	134.509	922.318	886.629	35.689	1243.4	942.64	300.765	850.037	833.334	16.703	1097.02	928.27	168.752	1128.56	936.848	191.711	942.891	883.62	59.271	1011.47	995.262	16.206	1001.75	901.886	99.862	898.657	803.693	94.964	990.556	952.053	38.503	1109.27	976.548	132.724	1051.16	1000.77	50.394	1336.13	947.496	388.631	1066.95	918.101	148.85	1176.65	981.655
1434.28	996.732	437.549	1081.55	991.651	89.894	925.239	891.056	34.183	1235.46	951.217	284.246	859.617	828.868	30.749	1098.63	928.16	170.472	1121.82	939.783	182.035	948.908	885.394	63.514	1007.95	995.902	12.052	998.225	898.572	99.653	891.122	802.323	88.799	992.505	949.873	42.632	1118.43	972.398	146.032	1055.94	999.633	56.304	1254.77	947.348	307.42	1071.6	915.899	155.704	1189.03	978.705
1399.22	1000.97	398.25	1090.66	988.82	101.844	925.452	894.704	30.748	1228.4	943.708	284.689	876.817	834.949	41.868	1084.18	933.04	151.139	1117.04	942.364	174.678	965.881	886.075	79.806	1014.61	996.148	18.461	999.56	905.302	94.258	890.796	796.202	94.594	1000.3	947.801	52.503	1111.81	973.213	138.594	1050.81	998.418	52.387	1271.27	942.968	328.303	1081.35	912.299	169.046	1198.26	976.37
1368.73	997.88	370.851	1077.43	990.049	87.381	929.545	892.183	37.362	1228.21	946.959	281.25	879.293	834.569	44.724	1080.48	925.698	154.78	1111.26	940.61	170.654	988.496	886.668	101.828	1008.68	991.277	17.4	1000.77	901.004	99.771	883.318	802.262	81.056	1011.28	950.722	60.554	1117.33	970.041	147.288	1043.16	1000.88	42.276	1236.75	948.374	288.376	1086.03	916.898	169.129	1202.4	979.198
1279.38	990.357	289.028	1121.12	990.853	130.267	932.629	895.509	37.12	1218.01	943.524	274.49	883.877	835.452	48.425	1087.3	927.379	159.918	1092.47	934.637	157.834	996.47	885.868	110.602	1011.57	995.462	16.106	1006.59	900.413	106.181	880.004	801.753	78.251	1012.07	948.748	63.321	1105.47	972.063	133.404	1042.36	999.957	42.403	1257.94	941.129	316.808	1070.69	914.891	155.8	1212.46	975.489
1500.89	991.032	509.863	1125.92	993.342	132.583	925.397	893.928	31.469	1216.85	945.618	271.232	900.641	832.72	67.921	1088.03	929.148	158.885	1098.17	932.855	165.313	1007.73	886.237	121.495	1009.34	994.77	14.572	989.483	900.865	88.618	876.813	802.849	73.964	1015.44	945.568	69.873	1100.94	974.156	126.786	1039.45	1003.34	36.107	1238.69	946.532	292.158	1069.56	915.369	154.195	1217.51	980.85
1538.43	988.248	550.186	1114.09	994.691	119.403	925.378	888.358	37.02	1209.21	947.355	261.858	897.243	831.633	65.61	1078.15	931.426	146.727	1087.14	933.428	153.716	1035.41	886.686	148.725	1010.21	992.348	17.864	985.85	896.826	89.024	873.027	801.548	71.479	1024.66	946.723	77.94	1100.83	977.899	122.932	1040.74	1001.54	39.209	1226.98	941.004	285.98	1071.17	914.171	157.004	1222.39	973.607
1521.07	991.963	529.106	1104.24	988.542	115.701	924.863	895.486	29.377	1190.82	946.022	244.802	897.087	828.746	68.341	1083.46	924.798	158.666	1078.19	942.542	135.653	1030.78	887.911	142.865	1018.23	996.898	21.336	975.85	897.015	78.835	864.535	805.919	58.616	1018.32	950.667	67.648	1095.12	976.531	118.59	1036.61	1002.21	34.404	1195.12	945.841	249.283	1065.93	918.78	147.148	1231.51	977.79
1522.39	994.995	527.4	1108.13	990.808	117.326	930.988	896.029	34.959	1166.52	945.405	221.115	903.381	829.007	74.374	1093.71	934.568	159.141	1071.42	941.689	129.735	1064.22	886.67	177.547	1038.82	995.962	42.857	970.388	902.992	67.396	867.975	801.001	66.974	1017.68	949.406	68.272	1087.78	974.71	113.068	1031.58	1005.87	25.702	1219.8	950.941	268.861	1054.19	919.599	134.592	1222.29	974.172
1548.71	993.066	555.645	1123.22	992.621	130.601	925.494	891.764	33.73	1153.04	949.298	203.737	900.991	831.895	69.096	1101.32	926.035	175.281	1043.61	940.702	102.906	1069.83	887.768	182.063	1061.15	997.475	63.679	965.472	900.552	64.92	865.803	804.886	60.917	1025.39	946.3	79.094	1088.14	974.216	113.921	1032.84	1000.56	32.274	1210.68	943.887	266.794	1056.79	916.777	140.012	1218.21	977.628
1549.11	995.551	553.559	1112.76	990.466	122.293	926.153	886.673	39.48	1141.97	947.106	194.867	902.167	829.229	72.938	1079.41	926.973	152.436	1045.15	940.018	105.133	1084.33	887.938	196.395	1066.35	992.905	73.443	960.89	902.497	58.393	863.429	807.289	56.14	1023.24	949.936	73.306	1083.95	977.61	106.343	1028.17	1001.05	27.122	1162.12	950.606	211.512	1067.65	914.214	153.437	1209.16	974.847
1576.87	994.632	582.234	1181.69	995.277	186.414	939.461	894.487	44.974	1139.07	949.143	189.926	896.549	830.343	66.206	1075.77	926.644	149.128	1036.63	938.099	98.533	1080.51	889.048	191.457	1075.84	993.546	82.298	954.687	902.481	52.206	867.677	802.653	65.024	1022.61	947.731	74.88	1087.14	976.05	111.088	1025.21	1001.03	24.177	1200.53	948.095	252.437	1060.87	916.815	144.057	1200.22	981.138
1539.51	990.101	549.412	1251.14	994.086	257.055	938.934	890.157	48.777	1130.38	944.216	186.167	896.3	833.117	63.183	1072.24	926.232	146.007	1036.99	943.433	93.561	1082.45	884.124	198.327	1086.73	997.684	89.042	949.111	897.534	51.577	860.484	799.948	60.536	1019.68	947.31	72.375	1074.31	976.863	97.45	1024.63	1002.2	22.434	1184.94	948.993	235.947	1051.76	915.053	136.703	1198.25	981.012
1527.98	995.848	532.132	1260	988.212	271.789	945.359	889.474	55.885	1114.46	943.28	171.183	890.136	832.72	57.416	1054.38	927.606	126.769	1031.64	940.732	90.91	1088.79	885.649	203.139	1100.48	992.009	108.476	946.239	899.456	46.783	864.704	803.903	60.801	1031.18	946.84	84.344	1066.19	976.379	89.811	1024.23	999.719	24.516	1212.11	949.285	262.824	1042.55	915.026	127.526	1187.21	980.45
1482.66	996.833	485.832	1254.48	993.406	261.074	943.172	888.853	54.319	1109	940.096	168.905	887.869	832.628	55.241	1050.76	924.889	125.871	1028.92	940.288	88.633	1108.89	889.328	219.559	1114.76	992.654	122.106	939.717	900.029	39.688	868.309	805.57	62.739	1026.45	946.822	79.63	1067.1	975.678	91.423	1026.18	1001.27	24.919	1209.14	949.285	259.853	1035.83	913.012	122.82	1178.28	977.4
1514.38	990.717	523.66	1246.94	987.892	259.053	944.094	891.363	52.731	1095.28	948.386	146.895	889.825	831.113	58.712	1044.26	924.468	119.793	1021.22	936.092	85.132	1097.85	886.132	211.717	1125.39	991.772	133.616	930.204	901.127	29.077	869.507	803.081	66.426	1024.71	950.889	73.824	1059.5	973.934	85.563	1026.83	1004.34	22.486	1254.64	948.426	306.215	1031.58	918.681	112.902	1170.05	980.251
1497.92	993.543	504.376	1225.54	989.374	236.165	948.909	894.018	54.891	1087.25	942.918	144.335	883.46	832.73	50.73	1044.93	928.242	116.692	1024.09	940.344	83.749	1097.64	885.159	212.481	1135.53	991.512	144.02	931.864	897.743	34.121	876.616	802.768	73.848	1024.4	949.679	74.717	1058.5	974.01	84.49	1023.07	1003.05	20.017	1274.65	946.369	328.282	1019.86	914.262	105.597	1163.21	982.441
1489.64	992.57	497.071	1223.66	996.654	227.011	945.131	893.7	51.431	1093.66	948.665	144.997	878.912	832.178	46.734	1040.17	930.997	109.178	1014.23	940.96	73.268	1127.43	882.706	244.724	1136.48	992.067	144.417	933.029	900.129	32.9	875.521	801.124	74.397	1018.7	949.607	69.091	1059.38	975.774	83.605	1027.04	1002.84	24.203	1292.36	946.919	345.436	1013.41	918.246	95.166	1146.36	982.543
1466.75	997.106	469.648	1210.51	989.39	221.117	948.266	894.444	53.822	1086.93	946.039	140.896	873.192	827.459	45.733	1041.26	930.912	110.352	1011.43	937.868	73.566	1134.1	885.455	248.645	1147.22	990.701	156.523	928.492	902.228	26.264	880.743	805.871	74.872	1022.59	951.905	70.687	1046.6	973.433	73.165	1022.95	1002.23	20.72	1320.85	950.28	370.567	1015.38	917.611	97.774	1135.82	978.28
1467.55	993.423	474.127	1218.67	990.21	228.456	946.188	893.502	52.686	1072.04	945.879	126.162	871.448	833.425	38.023	1031.42	920.309	111.115	1007.09	941.178	65.911	1126.2	888.611	237.59	1147.08	993.833	153.245	917.323	903.168	14.155	878.247	801.45	76.797	1016.01	951.449	64.558	1051.56	976.873	74.687	1018.88	1006.67	12.202	1349.93	953.077	396.849	1013.99	917.173	96.812	1124.18	977.1
1435.65	993.126	442.523	1212.48	991.213	221.269	944.793	892.648	52.145	1068.03	948.956	119.075	873.152	834.472	38.68	1033.11	929.061	104.046	992.362	935.373	56.989	1131.55	887.095	244.456	1136.4	996.073	140.331	922.316	898.472	23.844	881.926	803.181	78.745	1016.35	951.672	64.674	1046.38	977.499	68.885	1023.03	1001.16	21.869	1374.51	952.005	422.507	1018.42	916.951	101.474	1123.48	981.982
1336.07	996.299	339.775	1180.69	989.776	190.913	944.579	892.82	51.759	1055.81	944.553	111.255	869.479	829.034	40.445	1035.35	929.323	106.025	999.163	935.622	63.541	1117.87	890.629	227.242	1134.22	993.513	140.704	931.157	898.628	32.529	885.387	800.388	84.999	1010.51	951.194	59.319	1035.65	975.94	59.708	1020.86	1000.84	20.024	1384.41	950.358	434.056	1010.95	912.471	98.48	1107.46	977.327
1278.54	994.089	284.449	1166.13	992.168	173.964	939.434	886.751	52.683	1056.67	948.533	108.141	862.348	833.509	28.839	1042.19	928.11	114.085	997.069	938.79	58.279	1114.59	891.072	223.513	1146.61	993.148	153.462	938.492	898.753	39.739	881.985	803.752	78.233	1013.69	950.028	63.665	1036.7	979.807	56.895	1022.88	1004.69	18.198	1394.96	951.95	443.008	995.36	923.254	72.106	1096.07	978.597
1376.52	999.014	377.51	1168.41	997.363	171.047	943.226	893.814	49.412	1065.45	943.647	121.807	859.312	831.712	27.6	1039.41	931.034	108.374	995.63	935.442	60.188	1101.31	887.943	213.366	1133.96	997.057	136.906	943.57	902.961	40.609	885.667	804.066	81.601	1001.49	949.236	52.256	1036.65	974.965	61.687	1018.28	1002.47	15.804	1361.73	951.663	410.067	997.768	918.28	79.488	1086.51	977.52
1372.74	996.809	375.934	1163.78	994.692	169.088	924.051	893.314	30.737	1064.99	944.561	120.428	853.098	833.609	19.489	1047.72	926.735	120.983	994.298	938.531	55.767	1096.35	884.661	211.687	1135.23	997.64	137.588	941.496	897.89	43.606	893.99	806.232	87.758	992.846	952.071	40.775	1036.64	977.971	58.666	1015.58	1003.84	11.741	1342.65	949.893	392.761	992.73	917.594	75.136	1075.77	982.639
1358.23	994.429	363.8	1104.2	995.66	108.538	942.444	887.245	55.199	1075.83	948.03	127.796	852.69	827.328	25.362	1052.95	930.657	122.291	990.537	939.209	51.328	1083.65	886.925	196.726	1123.73	992.915	130.819	946.818	902.841	43.977	889.418	801.375	88.043	995.059	952.564	42.495	1033.21	974.461	58.75	1016.83	999.788	17.041	1359.68	955.128	404.553	999.26	917.028	82.232	1073.01	982.224
1347.51	992.137	355.375	1139.75	992.663	147.084	932.364	890.836	41.528	1066.05	949.639	116.408	849.52	831.957	17.563	1059.03	934.425	124.607	987.418	941.995	45.423	1077.4	888.972	188.43	1115.32	994.502	120.819	960.674	900.662	60.012	890.423	801.949	88.474	989.386	954.464	34.922	1041.48	975.183	66.302	1013.69	1003.88	9.818	1303.04	951.306	351.733	988.489	916.714	71.775	1068.32	981.041
1320.57	992.511	328.059	1115.78	997.312	118.465	936.908	887.399	49.509	1072.61	942.688	129.925	846.032	828.408	17.624	1082.5	930.495	152.005	990.693	941.036	49.657	1069.2	888.951	180.247	1113.18	993.58	119.602	964.318	902.274	62.044	890.847	805.773	85.074	990.499	954.705	35.794	1036.51	977.683	58.825	1016.93	1001.16	15.769	1371.33	955.499	415.834	998.14	922.8	75.34	1062.52	982.067
1288.08	996.083	292.001	1115.52	992.015	123.502	932.647	886.954	45.693	1081.68	945.023	136.655	842.576	830.024	12.552	1081.89	924.584	157.304	981.576	938.849	42.727	1063.85	887.808	176.039	1099.41	999.392	100.02	983.851	901.91	81.941	886.81	804.501	82.309	986.525	951.03	35.495	1035.64	979.008	56.63	1018.53	1004.66	13.879	1420.52	954.339	466.182	1007.12	919.856	87.265	1060.84	977.011
1225.64	1000.27	225.368	1101.82	996.486	105.33	931.053	891.664	39.389	1090.2	948.54	141.663	839.555	829.309	10.246	1089.42	924.441	164.982	979.989	941.144	38.845	1056.51	885.085	171.42	1097.25	997.911	99.343	995.419	900.29	95.129	893.64	803.681	89.959	990.04	952.299	37.741	1034.47	974.46	60.014	1016.92	1006.29	10.627	1430.74	950.493	480.243	1014.7	913.805	100.894	1045.44	984.133
1280.58	993.498	287.078	1073.78	995.238	78.546	934.206	891.618	42.588	1090.04	944.881	145.156	834.505	833.091	1.414	1105.31	930.892	174.414	982.232	940.429	41.803	1046.29	887.545	158.747	1093.09	995.258	97.829	1009.83	899.552	110.273	893.68	800.682	92.998	981.574	947.976	33.598	1035.86	979.217	56.641	1018.62	1002.39	16.234	1425.72	950.115	475.605	1019.31	921.015	98.299	1051.84	979.957
1265.78	995.573	270.204	1129.39	994.56	134.833	927.102	893.963	33.139	1114.93	948.145	166.783	835.341	837.624	-2.283	1120.56	932.618	187.941	986.798	939.242	47.556	1034.73	885.351	149.384	1085.99	993.481	92.507	1020.06	899.441	120.619	892.792	805.592	87.2	974.95	953.308	21.642	1043.41	978.01	65.396	1020.63	1001.63	19	1455.53	953.551	501.981	1023.67	919.45	104.221	1052.06	982.068
1248.72	993.1	255.625	1109.35	993.93	115.417	929.708	886.866	42.842	1123.01	951.225	171.786	835.122	830.435	4.687	1143.92	933.06	210.857	987.706	938.748	48.958	1023.5	889.289	134.208	1081.46	993.666	87.794	1041.63	900.466	141.16	883.897	806.055	77.842	979.34	949.165	30.175	1040.09	977.799	62.289	1020.26	999.56	20.701	1433.17	957.754	475.421	1033.85	924.694	109.154	1048.99	978.556
1232.76	1000.52	232.237	1107.1	990.89	116.205	923.792	888.479	35.313	1129.44	943.993	185.443	828.732	834.419	-5.687	1171.4	927.468	243.933	984.908	945.402	39.506	1019.75	889.498	130.257	1078.92	999.961	78.957	1046.23	904.451	141.781	882.401	801.613	80.788	973.501	952.04	21.461	1056.37	984.194	72.173	1017.65	1005.06	12.596	1427.21	949.112	478.095	1041.1	919.37	121.733	1044.18	979.612
1204.34	1000.62	203.712	1107.17	993.701	113.474	922.807	886.814	35.993	1144.43	948.274	196.158	833.532	831.847	1.685	1162.02	929.478	232.544	987.663	937.694	49.969	1005.33	886.416	118.915	1076.27	998.124	78.149	1039.56	901.265	138.294	878.921	809.112	69.809	981.161	952.597	28.564	1060.66	975.449	85.209	1017.69	1005.65	12.04	1490.74	956.698	534.047	1060.34	917.905	142.433	1034.15	982.693
1174.2	998.43	175.771	1105.25	996.296	108.95	926.245	886.515	39.73	1138.62	946.724	191.901	828.995	837.531	-8.536	1169.93	928.119	241.809	992.978	945.578	47.4	1000.01	890.078	109.935	1069.71	997.618	72.097	1055.3	904.282	151.017	881.277	801.8	79.477	986.954	953.579	33.375	1066.73	975.113	91.62	1019.64	1004.89	14.747	1476.11	953.401	522.704	1064.23	920.692	143.543	1034.68	981.431
1159.44	1001.57	157.872	1111.92	995.988	115.937	928.42	883.885	44.535	1159.41	942.863	216.549	829.865	830.115	-0.25	1178.8	930.213	248.59	991.072	939.657	51.415	995.608	895.666	99.942	1065.98	991.905	74.078	1055.98	901.698	154.28	873.932	803.736	70.196	984.445	949.932	34.513	1075.02	977.31	97.706	1016.65	1002.65	14	1460.17	947.238	512.928	1072.59	919.673	152.914	1040.55	983.609
1118.09	1001.49	116.597	1121.16	993.76	127.403	925.973	885.754	40.219	1168.65	946.398	222.251	835.015	833.337	1.678	1189.83	930.631	259.198	995.581	939.886	55.695	985.112	891.721	93.391	1058.68	993.255	65.426	1053.99	905.152	148.838	874.078	804.101	69.977	991.184	954.734	36.45	1075.93	979.84	96.087	1018.81	1005.15	13.663	1436.31	955.671	480.642	1078.92	919.936	158.98	1038.29	981.218
1152.11	1001.72	150.398	1129	998.242	130.755	917.588	883.549	34.039	1170.19	938.845	231.345	829.337	832.549	-3.212	1192.12	931.948	260.172	985.828	937.032	48.796	976.268	885.903	90.365	1051.64	995.941	55.697	1046.71	897.465	149.241	875.008	801.498	73.51	1000.64	952.749	47.894	1086.47	974.534	111.941	1016.3	1000.11	16.189	1449.23	947.495	501.74	1094.52	917.329	177.193	1029.79	981.389
1160.66	998.706	161.953	1137.3	998.714	138.585	925.136	882.175	42.961	1174.58	946.325	228.252	835.502	831.809	3.693	1190.89	932.161	258.726	992.376	938.002	54.374	970.341	882.547	87.794	1047.57	994.842	52.723	1055.01	897.202	157.81	878.528	804.91	73.618	1006.48	950.829	55.647	1083.91	976.338	107.569	1017.15	1001.5	15.655	1417.42	948.76	468.662	1109.58	915.266	194.311	1025.57	982.781
1161.89	1001.85	160.039	1149.46	997.064	152.395	918.975	877.416	41.559	1170.28	947.43	222.848	833.483	827.688	5.795	1184.63	935.778	248.849	992.762	943.416	49.346	967.346	889.849	77.497	1041.19	990.148	51.039	1047.8	901.668	146.131	865.66	800.539	65.121	1005.98	953.531	52.452	1084.95	976.739	108.208	1010.92	1002.09	8.822	1384.67	948.368	436.3	1112.43	919.83	192.604	1025.39	981.934
1156.12	1000.04	156.077	1169.44	1002.86	166.581	922.41	878.376	44.034	1188.09	947.207	240.885	828.283	834.572	-6.289	1184.06	928.008	256.054	992.247	944.566	47.681	961.712	890.96	70.752	1044.97	999.739	45.234	1063.96	906.599	157.359	870.208	804.226	65.982	1017.48	953.909	63.569	1087.58	975.93	111.645	1019.52	1001.88	17.637	1389.63	952.155	437.477	1124.43	917.183	207.252	1027.05	979.217
1141.98	1002.57	139.412	1203.47	999.3	204.168	915.536	881.002	34.534	1180.41	943.585	236.83	824.749	828.232	-3.483	1224.36	928.075	296.285	1047.82	939.382	108.438	958.036	890.41	67.626	1034.19	1000.11	34.081	1044.23	898.674	145.559	865.78	806.6	59.18	1027.28	953.346	73.931	1085.28	973.037	112.246	1016.26	1002.48	13.774	1376.2	950.081	426.12	1142.88	918.029	224.853	1030.62	987.564
1134.03	1002.67	131.364	1201.42	997.435	203.981	923.058	870.895	52.163	1159.12	945.341	213.78	826.425	828.604	-2.179	1243.79	930.501	313.292	1049.78	938.451	111.33	957.538	888.359	69.179	1034.82	994.337	40.483	1040.07	905.804	134.264	860.837	805.982	54.855	1021.17	952.126	69.048	1087.94	975.594	112.348	1019.55	1001.95	17.602	1338.39	953.684	384.708	1138.76	918.538	220.226	1020.03	982.572
1124.18	1000.31	123.871	1276.85	999.751	277.099	927.724	876.877	50.847	1123.3	944.838	178.459	821.999	832.674	-10.675	1237.4	928.502	308.9	1057.33	938.957	118.37	945.972	886.298	59.674	1043.04	993.024	50.011	1031.31	898.772	132.538	858.29	804.759	53.531	1042.94	954.909	88.03	1093.85	976.244	117.609	1019.28	1003.53	15.756	1326.08	949.019	377.058	1133.23	919.428	213.799	1016.99	980.432
1154.62	996.636	157.988	1313	1003.1	309.903	920.375	872.88	47.495	1152.15	948.22	203.934	822.744	826.666	-3.922	1241.6	926.212	315.386	1058.89	936.415	122.479	943.552	889.042	54.51	1044.86	989.386	55.478	1012.13	904.041	108.094	853.07	803.268	49.802	1039.22	955.724	83.498	1089.74	975.258	114.486	1024.46	1000.66	23.804	1313.11	949.029	364.081	1129.69	916.47	213.216	1022.26	978.158
1146.09	1004.98	141.112	1317.71	1004.34	313.376	916.386	873.332	43.054	1148.32	945.016	203.303	826.836	830.417	-3.581	1224.74	931.122	293.62	1061.12	943.307	117.809	940.311	889.252	51.059	1047.84	996.288	51.549	1015	903.792	111.211	856.961	803.343	53.618	1035.82	957.589	78.23	1083.77	979.184	104.583	1019.94	1003.02	16.918	1324.93	948.616	376.315	1132.02	917.051	214.966	1021.94	984.986
1144.11	1005.44	138.671	1346.98	1005.43	341.553	913.394	872.408	40.986	1134.06	946.643	187.417	830.142	831.424	-1.282	1222.52	929.72	292.797	1063.43	943.289	120.144	931.379	893.258	38.121	1058.02	994.942	63.074	1001.67	903.472	98.199	856.375	807	49.375	1030.04	956.232	73.809	1084.78	975.171	109.604	1015.98	998.664	17.316	1295.77	954.298	341.47	1129.05	918.518	210.532	1020.67	982.428
1162.12	1003.55	158.578	1378.21	1005.73	372.478	916.765	871.429	45.336	1129.77	948.838	180.936	831.916	830.661	1.255	1209.09	932.754	276.332	1059.94	946.757	113.181	927.646	892.942	34.704	1065.74	996.134	69.61	995.514	902.76	92.754	852.42	804.668	47.752	1033.74	958.52	75.219	1086.06	979.597	106.466	1025.18	1002.75	22.428	1302.19	953.346	348.849	1130.08	923.365	206.715	1016.86	982.661
1139.56	1002.44	137.123	1436.43	1004.05	432.383	919.605	872.752	46.853	1146.62	947.643	198.973	836.699	826.975	9.724	1201.74	927.755	273.985	1062.24	945.187	117.053	933.306	889.107	44.199	1079.97	998.491	81.481	998.068	901.788	96.28	846.436	802.705	43.731	1018.15	950.923	67.223	1086.34	976.925	109.419	1021.87	1003.71	18.16	1299.04	955.022	344.02	1118.8	916.323	202.478	1013.88	982.651
1099.8	1006.17	93.628	1436.36	1000.86	435.5	914.878	871.562	43.316	1133.23	948.601	184.628	840.428	833.807	6.621	1195.78	934.187	261.588	1059.35	937.307	122.047	929.391	889.614	39.777	1094.87	996.778	98.091	999.431	902.257	97.174	853.301	801.306	51.995	1020.75	952.288	68.466	1080.46	975.306	105.158	1024.12	1001.68	22.44	1272.55	947.708	324.841	1113.54	920.764	192.78	1019.78	977.207
1227.51	1008.48	219.033	1431.41	1002.36	429.046	915.241	872.975	42.266	1123.39	941.362	182.025	838.502	837.501	1.001	1174.66	923.492	251.164	1056.86	938.392	118.47	918.373	894.069	24.304	1102.8	991.843	110.953	973.395	900.338	73.057	849.866	799.981	49.885	1035.65	959.761	75.885	1073.84	977.097	96.74	1019	1001.89	17.109	1260.42	953.319	307.105	1108.16	920.628	187.536	1015.02	979.283
1241.27	1007.83	233.445	1447.06	1002.22	444.833	916.628	874.255	42.373	1109.43	942.113	167.319	840.877	831.24	9.637	1157	931.097	225.906	1053.52	945.008	108.51	920.625	887.966	32.659	1116.95	995.612	121.338	976.392	901.52	74.872	855.809	801.335	54.474	1052.11	946.849	105.265	1069.66	974.748	94.91	1020.88	1001.9	18.975	1251.59	949.019	302.571	1099.14	919.295	179.841	1014.04	980.695
1258.32	1000.73	257.588	1426.31	1006.38	419.931	913.997	868.277	45.72	1107.23	942.16	165.068	842.095	825.656	16.439	1149.95	925.841	224.11	1053.04	942.686	110.35	921.762	891.201	30.561	1105.63	993.056	112.576	965.66	901.429	64.231	849.489	795.771	53.718	1068.26	953.904	114.356	1052.94	979.861	73.081	1026.84	1007.56	19.282	1236.05	953.409	282.645	1092.08	921.302	170.775	1013.72	988.491
1260.51	1004.71	255.802	1459.87	1003.4	456.468	916.922	870.004	46.918	1085.61	948.938	136.671	846.066	833.59	12.476	1137.48	927.205	210.271	1050.96	943.163	107.794	921.528	888.041	33.487	1142.7	991.928	150.769	951.02	903.155	47.865	844.117	799.582	44.535	1048.43	955.565	92.862	1060.22	977.575	82.641	1020.42	1003.56	16.859	1217.67	949.508	268.163	1090.97	919.104	171.866	1015.45	979.111
1266.56	998.285	268.274	1436.28	1007.26	429.018	909.887	870.925	38.962	1085.51	941.611	143.894	847.829	834.569	13.26	1129.75	931.065	198.689	1047.61	935.698	111.911	916.462	888.988	27.474	1166.75	994.498	172.256	947.881	904.879	43.002	851.77	802.118	49.652	1049.1	949.733	99.369	1057.25	976.381	80.867	1020	1004.73	15.27	1176.01	949.43	226.581	1083.89	918.089	165.802	1009.26	980.228
1256.96	1007.26	249.706	1412.06	1006.87	405.187	907.307	873.356	33.951	1089.26	944.785	144.478	850.794	832.521	18.273	1108.46	929.992	178.466	1036.84	938.328	98.513	920.248	891.847	28.401	1175.36	994.614	180.748	957.199	903.175	54.024	849.178	800.132	49.046	1040.83	953.467	87.36	1052.13	973.888	78.239	1033.01	1006.67	26.347	1097.57	953.345	144.223	1080.85	920.393	160.454	1008.68	983.329
1266.46	1000.28	266.178	1400.62	1006.63	393.99	911.712	874.601	37.111	1059.25	944.292	114.955	853.593	833.218	20.375	1110.52	929.045	181.478	1036.51	940.16	96.347	918.522	891.783	26.739	1182.84	995.235	187.606	946.488	904.226	42.262	851.439	803.679	47.76	1047.59	954.552	93.041	1047.48	973.226	74.257	1027.62	1003.84	23.78	1114.19	955.77	158.418	1075.6	921.651	153.948	1010.75	984.37
1265.47	1004.64	260.831	1395.01	1005.67	389.334	896.636	871.364	25.272	1059.62	942.14	117.483	851.844	828.128	23.716	1106.53	930.701	175.827	1042.44	942.862	99.58	925.296	893.012	32.284	1196.9	992.778	204.125	943.191	907.662	35.529	849.267	798.952	50.315	1030.37	955.712	74.654	1046.33	972.772	73.557	1019.73	1003.91	15.819	1080.74	946.416	134.325	1062.71	917.297	145.409	1008.98	980.309
1205.88	1005.39	200.489	1478.17	1008.49	469.68	899.09	872.966	26.124	1041.26	945.201	96.058	853.712	827.16	26.552	1099.83	930.679	169.146	1038.72	942.832	95.884	930.98	889.854	41.126	1180.87	992.003	188.866	947.974	906.989	40.985	850.114	801.542	48.572	1026.11	954.854	71.256	1048.52	977.121	71.4	1025.61	1004.54	21.076	1136.24	947.408	188.832	1060.09	913.609	146.479	1013.95	980.607
1270.81	1000.92	269.891	1496.81	1009.69	487.121	892.85	872.434	20.416	1046.38	946.422	99.953	860.11	825.442	34.668	1098.71	934.549	164.159	1033.53	944.786	88.746	939.017	886.043	52.974	1209.95	999.472	210.476	940.879	902.57	38.309	845.973	804.539	41.434	1018.33	953.63	64.704	1045.24	976.885	68.352	1022.53	1002.27	20.262	1128.16	954.254	173.906	1053.65	917.68	135.966	1019.19	981.087
1289.31	1003.64	285.67	1458.12	1012.88	445.237	896.016	872.581	23.435	1053.27	943.161	110.107	846.983	832.359	14.624	1109.92	931.432	178.491	1029.14	946.38	82.765	933.636	893.821	39.815	1195.43	992.932	202.5	940.71	906.008	34.702	848.834	806.932	41.902	1016.74	954.952	61.783	1045.95	980.23	65.723	1024.77	1005.4	19.365	1150.33	950.666	199.668	1048.12	919.155	128.966	1020.53	979.237
1245.63	1004.49	241.142	1452.33	1006.38	445.953	910.183	875.864	34.319	1031.02	945.269	85.746	855.78	832.321	23.459	1096.82	935.832	160.986	1027.26	940.679	86.584	946.792	887.588	59.204	1190	989.76	200.242	931.246	901.909	29.337	851.172	799.484	51.688	1008.65	956.557	52.093	1038.29	972.414	65.873	1023.52	1006.49	17.026	1145.02	946.85	198.174	1041.13	923.609	117.526	1025.04	987.369
1254.64	1003.6	251.041	1445.13	1012.73	432.4	916.814	874.541	42.273	1035.97	946.875	89.097	856.008	832.933	23.075	1113.6	933.438	180.16	1024.55	945.198	79.355	945.098	890.572	54.526	1186.72	995.039	191.686	930.756	901.983	28.773	843.488	801.19	42.298	1004.62	953.572	51.047	1039.29	970.783	68.506	1020.83	1004.87	15.957	1114.26	949.343	164.92	1033.31	921.551	111.756	1020.92	980.28
1256.03	1002.61	253.427	1439.47	1012.74	426.735	918.79	876.3	42.49	1033.75	949.218	84.532	852.96	831.993	20.967	1128.51	935.607	192.902	1026.54	943.682	82.855	958.897	891.985	66.912	1182.17	996.563	185.607	928.846	903.501	25.345	851.4	802.754	48.646	1002.28	956.371	45.912	1041.93	980.504	61.428	1021.08	1006.43	14.649	1135.79	948.53	187.258	1027.12	914.893	112.226	1014.67	982.562
1252.95	1008.5	244.446	1440.63	1012.31	428.32	926.099	875.357	50.742	1008.11	945.753	62.361	855.694	834.448	21.246	1146.58	935.043	211.537	1023.65	947.027	76.627	960.701	893.497	67.204	1171.36	999.16	172.2	919.084	903.032	16.052	853.983	801.415	52.568	994.666	952.248	42.418	1030.08	978.638	51.441	1021.71	1004.33	17.38	1136.78	953.828	182.956	1021.03	919.823	101.211	1010.52	981.459
1244.57	999.877	244.694	1426.48	1004.1	422.385	926.306	882.016	44.29	1009.39	941.502	67.89	857.9	829.262	28.638	1188.99	936.077	252.909	1027.96	944.786	83.171	968.798	888.787	80.011	1155.13	995.832	159.301	929.84	902.741	27.099	861.908	798.432	63.476	995.575	957.349	38.226	1032.07	976.196	55.871	1022.68	1005.08	17.604	1191.83	950.407	241.42	1017.82	921.403	96.421	1012.61	984.439
1233.94	1007.87	226.072	1400.62	1008.46	392.162	923.397	881.596	41.801	1014.2	944.755	69.441	856.477	835.012	21.465	1217.54	932.495	285.047	1027.1	944.761	82.335	973.002	890.227	82.775	1146.54	996.352	150.188	923.668	906.342	17.326	863.39	798.958	64.432	985.822	956.203	29.619	1032.92	976.073	56.847	1029.02	1006.71	22.314	1205.86	950.021	255.838	1018.83	915.886	102.947	1018.13	979.905
1209.04	1008.1	200.939	1400.99	1016.42	384.565	915.919	869.72	46.199	1011.32	941.566	69.756	850.522	833.849	16.673	1240.5	931.143	309.356	1031.01	941.42	89.592	976.538	892.293	84.245	1174.24	995.043	179.199	916.677	904.242	12.435	856.701	800.43	56.271	986.831	956.19	30.641	1028.12	974.325	53.799	1023.2	1006.23	16.967	1223.29	951.075	272.216	1012.52	920.593	91.929	1023.08	983.864
1180.75	1006.99	173.761	1384.69	1011.41	373.274	917.224	873.511	43.713	1008.44	939.163	69.273	853.288	829.722	23.566	1291.37	933.742	357.626	1034.4	943.312	91.085	975.244	891.007	84.237	1175.41	992.56	182.852	916.391	902.518	13.873	868.182	800.122	68.06	985.072	954.613	30.459	1023.35	974.922	48.426	1025.11	1003.11	21.998	1229.19	946.683	282.503	1009.76	916.891	92.87	1022	985.031
1157.09	1002.79	154.299	1344.72	1009.72	335.003	922.752	874.949	47.803	1009.4	946.26	63.139	851.872	831.14	20.732	1313.38	936.983	376.395	1034.21	947.167	87.045	976.362	890.164	86.198	1154.04	997.315	156.723	915.374	905.73	9.644	866.004	800.136	65.868	978.217	957.953	20.264	1016.22	977.956	38.259	1021.98	1002.58	19.397	1249.82	949.606	300.214	1000.62	920.907	79.709	1017.54	981.894
1162.35	1005.21	157.143	1354.69	1008.42	346.27	918.113	869.648	48.465	1012.49	944.814	67.676	849.621	831.042	18.579	1382.43	938.645	443.787	1042.2	945.092	97.112	974.058	885.357	88.701	1148.41	994.468	153.939	919.231	903.525	15.706	871.2	797.642	73.558	983.696	950.575	33.121	1016.35	974.52	41.826	1020.71	1007.89	12.825	1268.19	944.367	323.828	1007.82	922.31	85.507	1016.64	983.481
1193.09	1013.32	179.765	1312.23	1011.65	300.583	919.576	878.329	41.247	1007.79	947.29	60.504	852.191	829.038	23.153	1395.22	931.61	463.607	1049.26	945.462	103.802	979.84	885.978	93.862	1134.21	995.492	138.716	922.774	904.953	17.821	866.403	799.415	66.988	990.602	956.246	34.356	1016.12	974.778	41.345	1027.37	1002.66	24.707	1284.08	952.098	331.979	1000.99	918.06	82.927	1010.03	983.438
1175.05	1004.92	170.125	1301.92	1012.53	289.393	928.031	877.388	50.643	1020.49	946.688	73.805	845.11	833.698	11.412	1442.75	934.208	508.544	1061.88	942.475	119.405	976.317	886.367	89.95	1133.73	993.169	140.561	923.489	903.964	19.525	872.703	797.928	74.775	991.916	955.545	36.371	1016.73	974.76	41.973	1020.88	1006.12	14.757	1303.84	949.574	354.269	998.265	924.02	74.245	1017.11	978.836
1179.94	1013.02	166.921	1292.75	1015.47	277.282	926.988	871.194	55.794	1007.05	947.67	59.382	842.978	828.999	13.979	1482.82	936.201	546.62	1074.56	947.989	126.568	971.965	886.196	85.769	1107.6	999.959	107.639	933.664	907.228	26.436	873.035	800.196	72.839	1005.27	956.529	48.745	1021.96	970.612	51.348	1021.66	1003.83	17.83	1322.4	948.691	373.71	1003.35	922.627	80.718	1017.67	985.678
1165.26	1008.2	157.061	1266.38	1011.03	255.348	915.294	875.878	39.416	997.362	943.885	53.477	841.907	827.719	14.188	1515.44	933.862	581.576	1084.46	944.568	139.891	978.319	886.011	92.308	1119.15	1000.01	119.135	930.228	901.826	28.402	871.779	801.459	70.32	1003.25	956.402	46.849	1027.11	972.371	54.739	1018.45	1004.76	13.687	1336	947.98	388.023	999.492	920.091	79.401	1019.96	986.078
1146.83	1005.08	141.753	1266.83	1011.23	255.608	924.739	879.339	45.4	1002.86	949.204	53.658	835.825	830.626	5.199	1536.41	937.652	598.762	1098.97	942.096	156.873	971.238	883.393	87.845	1095.87	995.787	100.08	955.51	902.305	53.205	873.299	799.098	74.201	1014.17	957.388	56.786	1030.41	971.078	59.333	1018.3	1008.25	10.047	1352.06	951.625	400.431	997.94	923.102	74.838	1020.03	984.287
1143.62	1006.88	136.737	1250.11	1014.22	235.892	918.346	877.25	41.096	1005.23	944.056	61.171	833.61	827.924	5.686	1544.58	942.103	602.481	1104.6	948.47	156.129	969.062	884.035	85.027	1083.94	995.922	88.016	953.672	903.349	50.323	880.96	794.312	86.648	1034.28	954.818	79.464	1027.73	970.805	56.921	1016.69	1002.78	13.918	1352.33	952.177	400.149	995.374	921.197	74.177	1012.92	984.685
1137.72	1011.85	125.872	1244.74	1012.89	231.851	924.175	872.713	51.462	1002.97	948.653	54.312	837.524	833.888	3.636	1555.04	936.428	618.61	1133.87	945.728	188.144	970.048	880.22	89.828	1090.88	996.292	94.583	961.415	905.643	55.772	878.814	799.403	79.411	1062.95	953.711	109.242	1034.73	975.04	59.689	1020.42	1004.54	15.888	1363.52	953.558	409.959	999.521	921.496	78.025	1008.88	983.362
1135.63	1006.97	128.653	1232.21	1007.36	224.848	916.159	879.881	36.278	1001.31	948.381	52.933	828.756	832.196	-3.44	1587	939.564	647.439	1145.3	942.292	203.011	955.642	883.442	72.2	1080.74	997.428	83.308	983.405	898.004	85.401	870.458	801.763	68.695	1081.9	953.159	128.738	1039.44	966.337	73.102	1021.57	1003.22	18.351	1377.92	953.133	424.791	995.825	922.311	73.514	1016.04	985.092
1125.96	1009.41	116.556	1217.44	1011.36	206.078	919.677	872.955	46.722	1001.39	951.113	50.282	831.856	829.565	2.291	1562.13	936.259	625.874	1158.67	945.857	212.814	959.094	883.817	75.277	1071.19	997.307	73.882	980.881	899.786	81.095	868.912	799.693	69.219	1094.58	957.635	136.94	1045.43	974.709	70.718	1021.09	1005.03	16.058	1364.69	955.196	409.495	1008.52	919.923	88.598	1015.93	986.544
1117.7	1009.2	108.497	1209.52	1016.01	193.509	918.295	875.219	43.076	1007.38	943.199	64.181	833.221	830.517	2.704	1552.01	938.128	613.884	1163.27	940.461	222.811	964.705	876.608	88.097	1075.89	993.541	82.353	987.464	900.229	87.235	873.382	799.354	74.028	1099.12	960.079	139.046	1051.88	977.324	74.559	1020.51	1008.57	11.942	1358.26	952.464	405.8	1008.92	921.781	87.142	1020.04	982.994
1108.75	1012.45	96.305	1211.16	1009.66	201.494	923.724	875.557	48.167	1003.63	946.93	56.705	839.967	830.481	9.486	1588.58	943.069	645.508	1178.24	943.584	234.655	957.748	878.117	79.631	1055.28	992.633	62.642	1016.12	906.14	109.981	871.226	800.083	71.143	1109.84	955.637	154.207	1061.17	974.677	86.492	1019.01	1007.05	11.959	1309.1	955.915	353.187	1017.62	922.834	94.786	1012.13	984.123
1106.4	1005.21	101.19	1219.53	1016.77	202.761	920.572	879.184	41.388	1003.28	945.658	57.621	833.983	830.16	3.823	1611.15	938.636	672.51	1185.7	940.159	245.54	949.251	880.872	68.379	1056.77	990.831	65.942	1021.07	907.138	113.931	871.428	800.855	70.573	1115.99	959.161	156.83	1058.37	974.711	83.662	1020.53	1005.64	14.891	1357.86	949.908	407.951	1016.93	923.458	93.473	1016.65	986.421
1095.1	1010.51	84.593	1225.17	1012.27	212.897	917.273	874.635	42.638	1010.88	952.756	58.121	835.399	831.737	3.662	1564.74	936.464	628.28	1194.6	945.332	249.266	948.467	876.125	72.342	1046.2	990.929	55.271	1026.04	900.795	125.247	877.466	795.899	81.567	1117.32	956.845	160.479	1055.07	968.925	86.149	1019.76	1004.39	15.369	1281.36	953.337	328.022	1019.83	928.939	90.889	1018.72	982.307
1087.58	1009.43	78.153	1241.23	1016.95	224.273	913.235	875.543	37.692	1021.7	951.733	69.966	837.984	832.493	5.491	1570.57	943.203	627.37	1198.74	940.858	257.883	944.445	875.573	68.872	1037.59	989.602	47.988	1041.73	904.536	137.197	875.96	798.883	77.077	1124.52	959.643	164.878	1089.57	968.802	120.769	1014.29	1008.98	5.31	1301.9	951.041	350.862	1024.47	921.696	102.776	1012.07	987.537
1088.48	1008.42	80.059	1251.2	1012.35	238.85	913.52	873.981	39.539	1020.89	949.24	71.646	841.3	830.602	10.698	1588.77	941.398	647.367	1200.38	944.268	256.108	940.613	875.898	64.715	1043.64	996.734	46.91	1055.97	903.258	152.717	868.708	800.708	68	1123.34	955.776	167.568	1097.33	974.688	122.641	1023.99	1007.04	16.945	1281.34	957.298	324.045	1030.81	922.789	108.024	1002.74	986.543
1097.58	1004.83	92.754	1257.82	1020.68	237.14	911.535	877.79	33.745	1015.08	946.296	68.78	849.012	832.677	16.335	1624.42	943.097	681.323	1205.13	942.118	263.01	940.257	875.85	64.407	1039.96	991.803	48.153	1054.99	906.734	148.255	871.044	803.739	67.305	1122.22	956.197	166.026	1106.36	972.525	133.833	1022.37	1004.26	18.105	1278.48	953.224	325.261	1029.35	922.302	107.048	1013.76	985.02
1087.86	1003.56	84.305	1284.03	1016.46	267.573	913.166	876.005	37.161	1027.09	945.619	81.469	846.656	835.561	11.095	1612.54	944.614	667.925	1202.54	945.732	256.809	935.172	873.436	61.736	1036.3	994.388	41.916	1056.75	903.959	152.791	871.054	796.966	74.088	1131.95	957.449	174.502	1118.59	975.249	143.341	1017.41	1007.71	9.701	1268.83	956.461	312.366	1031.88	922.574	109.308	1017.66	982.829
1085.62	1009.64	75.986	1326.52	1017.39	309.136	910.78	871.763	39.017	1015.98	951.378	64.605	852.136	831.828	20.308	1599.93	944.393	655.533	1203.84	946.322	257.516	936.248	879.078	57.17	1040.01	995.014	44.995	1070.91	909.133	161.773	867.457	800.396	67.061	1131.63	955.715	175.916	1130.53	973.231	157.297	1016.97	1004.69	12.273	1296.11	960.372	335.735	1027.85	917.011	110.843	1014.04	981.994
1083.19	1005.26	77.93	1350.28	1013.48	336.796	911.816	877.241	34.575	1003.95	946.802	57.148	862.439	831.662	30.777	1607.08	941.91	665.171	1199.81	949.905	249.903	932.954	876.544	56.41	1030.57	998.026	32.545	1070.5	899.138	171.366	864.05	800.761	63.289	1122.13	958.543	163.588	1127.31	978.786	148.527	1015.86	1003.6	12.266	1287.32	959.666	327.658	1032.36	923.053	109.304	1015.23	984.038
1073.87	1008.1	65.771	1348.34	1009.73	338.614	912.399	876.058	36.341	1004.27	941.833	62.44	866.422	828.719	37.703	1597.71	941.075	656.638	1180.57	943.482	237.092	930.963	877.926	53.037	1033.5	994.355	39.142	1050.51	899.766	150.742	866.169	801.724	64.445	1113.59	959.302	154.29	1139.43	972.009	167.422	1011.27	1007.77	3.499	1270.75	956.602	314.149	1033.59	920.216	113.373	1008.73	983.23
1071.2	1010.62	60.585	1394.75	1016.08	378.669	912.19	877.615	34.575	1014.77	947.358	67.412	870.511	829.334	41.177	1590.85	942.188	648.657	1179.99	945.764	234.224	924.109	876.682	47.427	1030.5	991.329	39.17	1067.83	902.085	165.747	862.68	801.802	60.878	1108.97	957.998	150.969	1133.71	974.032	159.681	1016.1	1007	9.094	1255.82	960.111	295.711	1028.01	922.228	105.779	1013.4	983.595
1074.61	1008.91	65.693	1424.9	1015.79	409.106	909.866	874.166	35.7	1017.4	949.944	67.453	881.967	832.113	49.854	1566.6	937.682	628.918	1164.38	948.605	215.78	919.43	876.996	42.434	1035.81	990.991	44.817	1047.73	902.043	145.687	859.951	802.727	57.224	1105.23	958.988	146.238	1139.76	970.728	169.028	1018.79	1010.29	8.497	1258.03	958.78	299.25	1032.87	923.731	109.14	1010.16	986.644
1074.88	1012.26	62.615	1462.48	1013.61	448.868	914.816	878.694	36.122	1018.83	945.978	72.852	873.89	827.777	46.113	1547.13	941.49	605.64	1149.89	950.381	199.505	920.804	879.556	41.248	1031.94	997.025	34.918	1057.86	905.766	152.09	859.469	803.882	55.587	1107.21	957.779	149.436	1152.13	974.423	177.706	1026.36	1011.49	14.876	1278.73	960.453	318.274	1029.94	916.601	113.339	1011.09	983.432
1066.48	1011.78	54.699	1487.51	1010.81	476.698	908.587	876.889	31.698	1014	949.289	64.708	882.49	829.852	52.638	1514.75	945.272	569.482	1140.47	946.842	193.626	918.426	876.346	42.08	1037.62	993.562	44.06	1058.58	904.039	154.542	861.012	796.266	64.746	1087.25	959.705	127.545	1154.53	975.594	178.935	1024.98	1010.32	14.656	1263.48	962.891	300.593	1027.9	923.451	104.45	1015.67	987.83
1074.89	1009.67	65.216	1496.11	1015.45	480.664	905.955	874.002	31.953	1021.27	948.138	73.13	896.265	830.071	66.194	1499.53	941.249	558.279	1133.18	950.514	182.669	914.42	874.216	40.204	1044.16	992.682	51.474	1064.59	905.388	159.2	857.701	798.838	58.863	1086.5	955.931	130.57	1149.93	973.228	176.704	1023.1	1008.89	14.214	1260.69	964.012	296.678	1025.48	924.557	100.92	1013.81	984.938
1068.38	1008.58	59.805	1536	1011.45	524.551	902.69	874.773	27.917	1017	951.532	65.463	886.294	831.792	54.502	1460.08	945.134	514.944	1129.92	948.747	181.175	920.187	872.669	47.518	1046.24	992.628	53.611	1043.67	903.752	139.92	857.661	801.628	56.033	1083.21	956.442	126.773	1148.03	975.362	172.669	1019.11	1004.67	14.44	1237.62	960.854	276.769	1009.31	919.351	89.959	1006.28	984.009
1063.05	1008.97	54.079	1533.39	1010.62	522.761	910.995	876.313	34.682	1016.54	948.546	67.996	889.108	828.455	60.653	1477.45	944.28	533.166	1134.16	950.073	184.09	916.584	881.57	35.014	1054.26	993.688	60.574	1041.03	897.298	143.733	853.463	797.342	56.121	1079.59	956.909	122.685	1144.24	974.337	169.905	1025.44	1008.46	16.981	1221.79	961.376	260.411	1011.79	923.889	87.905	1001.67	987.258
1068.91	1011.23	57.681	1532.6	1011.23	521.367	909.735	872.487	37.248	1010.1	947.218	62.883	886.325	830.149	56.176	1478.58	941.458	537.119	1138.58	952.122	186.461	909.378	878.088	31.29	1059.88	987.453	72.422	1042.5	904.607	137.892	852.788	799.712	53.076	1074.03	955.841	118.192	1135.99	977.338	158.656	1020.96	1007.66	13.296	1192.71	964.093	228.615	1018.35	925.523	92.826	998.853	984.849
1062.04	1011.33	50.715	1546.01	1016.01	529.994	907.826	876.933	30.893	1001.6	947.58	54.018	883.296	830.645	52.651	1441.94	938.581	503.361	1127.58	944.954	182.621	911.413	880.425	30.988	1069.6	985.746	83.85	1028.36	901.389	126.968	852.698	797.506	55.192	1059.65	959.478	100.171	1123.5	974.955	148.542	1019.81	1010.96	8.85	1184.5	964.754	219.75	1011.96	922.042	89.92	1008.55	988.399
1055.99	1013.94	42.045	1560.91	1015.72	545.189	910.921	874.542	36.379	997.191	943.905	53.286	880.986	833.36	47.626	1421.33	941.482	479.843	1122.38	952.43	169.949	906.562	882.019	24.543	1073.71	993.882	79.826	1021.16	901.912	119.252	851.352	800.719	50.633	1053.79	959.702	94.089	1123.88	973.834	150.041	1025.81	1013.95	11.861	1191.82	957.73	234.094	1006.65	922.572	84.082	1005.34	985.794
1065.16	1011.99	53.17	1568.03	1013.18	554.851	912.63	871.882	40.748	1003.6	950.345	53.258	882.178	831.012	51.166	1382.57	944.851	437.721	1113.83	947.069	166.764	915.498	878.788	36.71	1072.85	992.698	80.148	1007.61	901.115	106.491	846.36	802.451	43.909	1041.49	956.709	84.779	1119.16	972.293	146.87	1018.67	1008.46	10.207	1178.7	963.321	215.377	1014.11	924.112	89.997	999.439	987.517
1070.9	1014.1	56.809	1557.22	1013.3	543.92	910.363	878.124	32.239	998.523	944.964	53.559	874.018	835.57	38.448	1363.94	937.195	426.747	1123.95	949.706	174.249	906.428	875.128	31.3	1082.79	991.342	91.45	992.833	907.759	85.074	853.874	797.549	56.325	1044.56	957.844	86.714	1115.37	973.379	141.995	1016.34	1006.71	9.634	1152.33	967.591	184.743	1011.73	923.144	88.587	1008.9	988.352
1065.85	1005.86	59.991	1568.75	1010.13	558.624	908.157	875.511	32.646	1006.05	944.273	61.778	900.172	831.198	68.974	1357.24	944.853	412.385	1118.58	952.488	166.092	910.804	873.324	37.48	1086.56	993.362	93.196	1002.07	900.474	101.595	850.85	802.508	48.342	1023.19	958.378	64.816	1113.98	977.256	136.722	1024.9	1012.86	12.041	1109.74	965.059	144.684	1004.14	921.34	82.797	1005.51	987.691
1064.44	1013.1	51.348	1547	1012.79	534.21	907.576	879.512	28.064	992.18	947.598	44.582	900.172	828.29	71.882	1331.7	940.478	391.224	1106.11	949.842	156.266	902.14	876.845	25.295	1088.09	988.378	99.713	1003.19	898.052	105.136	850.167	799.202	50.965	1030.45	961.514	68.941	1124.82	973.194	151.623	1014.88	1006.45	8.426	1119.57	962.045	157.521	997.69	920.724	76.966	1001.92	985.647
[truncated: 40 more columns]

## Sheet: 250112
field15_cell1avg	field15_cell1bkg	field15_cell1sub	field15_cell2avg	field15_cell2bkg	field15_cell2sub	field15_cell3avg	field15_cell3bkg	field15_cell3sub	field15_cell4avg	field15_cell14bkg	field15_cell14sub	field15_cell5avg	field15_cell5bkg	field15_cell5sub	field15_cell6avg	field15_cell6bkg	field15_cell6sub	field15_cell7avg	field15_cell7bkg	field15_cell7sub	field16_cell1avg	field16_cell1bkg	field16_cell1sub	field16_cell2avg	field16_cell2bkg	field16_cell2sub	field16_cell3avg	field16_cell3bkg	field16_cell16sub	field16_cell4avg	field16_cell4bkg	field16_cell4sub	field16_cell5avg	field16_cell5bkg	field16_cell5sub	field16_cell6avg	field16_cell6bkg	field16_cell6sub	field16_cell7avg	field16_cell7bkg	field16_cell7sub	field17_cell1avg	field17_cell1bkg	field17_cell1sub	field17_cell2avg	field17_cell2bkg	field17_cell2sub	field17_cell3avg	field17_cell3bkg
2338.12	2187.43	150.688	2092.41	1817.1	275.312	1926.8	1881.72	45.073	2336.16	2223.83	112.333	2793.9	1979.26	814.645	2354.06	2187.84	166.223	2131.16	2024.57	106.595	2292.11	2163.58	128.533	2256.08	2123.77	132.311	2399.2	2191.53	207.676	2436.72	1979.6	457.126	2447.7	2266.5	181.204	2258.26	2120.37	137.889	2303.72	2028.68	275.037	2082.43	1749.93	332.501	2375.88	2202.53	173.35	1579.77	1593.54
2263.62	2106.58	157.038	1988.4	1744.82	243.58	1861.31	1798.99	62.319	2228.63	2147.25	81.379	2627.2	1969.22	657.979	2254.25	2112.32	141.927	2035.13	1952.08	83.059	2244.92	2106.46	138.463	2191.86	2061.89	129.971	2321.38	2129.49	191.891	2344.42	1918.63	425.786	2386.33	2210.72	175.617	2215.69	2068.13	147.553	2234.02	1975.77	258.251	1995.94	1707.97	287.974	2283.54	2143.33	140.215	1555.89	1551.06
2158.57	2037.77	120.799	1929.44	1697.84	231.595	1797.3	1760.94	36.358	2162.56	2086.26	76.301	2465.36	1954.62	510.741	2179.01	2048.76	130.244	1973.93	1887.87	86.056	2190.35	2074.51	115.839	2129.99	2032.67	97.324	2241.11	2092.24	148.87	2254.41	1882.95	371.469	2354.43	2169.5	184.926	2144.34	2021.73	122.608	2204.52	1940.42	264.096	1955.34	1655.39	299.952	2196.08	2079.79	116.292	1487.79	1505.89
2086.82	1994.36	92.464	1866.18	1668.44	197.741	1768.68	1720.71	47.966	2102.31	2035.45	66.857	2401.71	1950.89	450.819	2119.09	1999	120.092	1928.75	1844.87	83.884	2146.41	2045.16	101.253	2098.44	2002.39	96.049	2218.49	2061.99	156.502	2208.87	1851.45	357.414	2300.39	2135.32	165.075	2118.78	1998.32	120.469	2141.29	1911.48	229.807	1902.32	1615.82	286.502	2130.98	2030.61	100.362	1466.67	1470.5
2061.99	1958.12	103.875	1856.43	1643.73	212.706	1732.19	1698.51	33.686	2066.13	2003.77	62.366	2304.79	1945.44	359.354	2081.31	1964.26	117.053	1899.4	1812.47	86.933	2094.13	2033	61.124	2096.55	1983.63	112.91	2175.23	2047.16	128.076	2166.49	1840.95	325.539	2255.46	2128.15	127.308	2078.43	1980.3	98.133	2144.12	1896.77	247.355	1851.4	1590.85	260.55	2132.79	2005.26	127.532	1441.12	1456.29
2022.16	1935.84	86.325	1839.28	1629.32	209.963	1726.06	1683.66	42.401	2027.8	1979.26	48.549	2219.64	1940.01	279.627	2030.4	1940.44	89.952	1874.7	1789.47	85.226	2098.7	2022.18	76.52	2087.12	1970.28	116.833	2171.06	2039.5	131.557	2139.46	1825.94	313.512	2230.64	2109.84	120.8	2038.58	1975.44	63.138	2126.13	1886.27	239.855	1778.48	1572.55	205.938	2081.82	1978.57	103.252	1451.14	1435.39
2005.82	1923.99	81.83	1816.01	1619.51	196.502	1718.44	1674.02	44.425	2002.87	1969.22	33.655	2194.24	1928.35	265.891	2023.43	1925.92	97.508	1869.25	1782.63	86.625	2070.07	2020.55	49.515	2068.26	1966.13	102.128	2130.32	2025.82	104.499	2101.93	1817.16	284.772	2184.53	2109.2	75.33	2046.62	1966.3	80.314	2088.96	1879.71	209.253	1787.93	1569.01	218.925	2086.17	1974.57	111.604	1442.64	1435.51
1984.24	1905.95	78.285	1797.41	1606.66	190.751	1695.41	1662.18	33.239	1987.72	1954.62	33.098	2141.35	1930.32	211.036	1988.9	1910.86	78.044	1833.72	1766.47	67.255	2082.09	2007.28	74.806	2060.29	1961.56	98.73	2132.34	2026.23	106.113	2058.49	1814.54	243.955	2161.87	2099.21	62.653	2008.51	1956.68	51.827	2090.84	1875.9	214.94	1786.88	1555.17	231.712	2078.72	1953.45	125.264	1427.67	1419.89
1997.02	1900.79	96.225	1776.85	1601.38	175.467	1692.01	1652.38	39.629	1976.87	1950.89	25.983	2125.07	1921.06	204.013	1989.49	1904.71	84.778	1838.78	1758.91	79.862	2037.82	1995.5	42.324	2067.26	1949.23	118.029	2116.23	2013.83	102.396	2027.56	1807.92	219.639	2120.69	2087.69	33.001	1992.91	1950.16	42.755	2080.76	1863.54	217.224	1764.32	1543.72	220.596	2029.79	1944.6	85.193	1414.8	1415.64
1992.29	1888.72	103.564	1748.69	1594.15	154.549	1670.16	1647.97	22.19	1955.26	1945.44	9.819	2085.68	1917.34	168.344	1976.78	1894.34	82.432	1820.4	1746.01	74.385	2027.64	1991.62	36.019	2051.84	1940.64	111.192	2093.77	2002.91	90.864	1996.73	1799.07	197.661	2132.39	2083.55	48.848	1990.42	1941.6	48.818	2070.26	1856.22	214.043	1712.38	1534.53	177.858	2006.92	1928.95	77.971	1416.57	1407.09
2018.02	1889.3	128.715	1749.23	1589.78	159.451	1672.18	1643.77	28.414	1942.88	1940.01	2.865	2065.36	1907.64	157.722	1978.87	1888.77	90.094	1816.6	1744.38	72.219	2011.3	1976.98	34.318	2057.3	1933.5	123.801	2089.11	1997.93	91.179	1963.49	1796.78	166.714	2148.27	2073.4	74.872	1962.85	1934.83	28.019	2055.97	1850.64	205.327	1753.07	1530.96	222.104	2002.98	1923.29	79.689	1416.77	1398.49
1992.99	1875.26	117.738	1724.13	1580.4	143.729	1654.26	1632.42	21.837	1927.53	1928.35	-0.827	2055.88	1900.54	155.348	1949.36	1878.78	70.582	1811.06	1728.8	82.26	2016.95	1975.25	41.703	2027.85	1931.46	96.387	2102.53	1998.35	104.184	1954.08	1791.83	162.245	2159.07	2067.41	91.66	1967.37	1932.75	34.619	2070.38	1844.38	226.004	1714.28	1521.39	192.889	1974.59	1902.55	72.038	1378.45	1389.86
1996.27	1869.8	126.475	1738.87	1579.66	159.214	1658.69	1632.43	26.261	1922.92	1930.32	-7.394	2043.65	1893.23	150.416	1962.42	1874.91	87.515	1814.03	1727.1	86.925	1996.17	1964.79	31.386	2035.51	1922.31	113.202	2057.33	1986.65	70.681	1952.12	1778.97	173.147	2134.73	2057.21	77.523	1953.95	1922.39	31.553	2054.67	1835.7	218.963	1692.92	1514.45	178.471	1984.28	1895.37	88.91	1395.29	1381.74
1987.9	1862.46	125.435	1704.68	1571.58	133.101	1648.24	1624.63	23.612	1910.88	1921.06	-10.174	2038.79	1881.85	156.941	1943.37	1862.78	80.591	1791.85	1715.36	76.489	1986.3	1960.08	26.222	2026.27	1916.84	109.428	2050.54	1981.15	69.389	1934.42	1775.13	159.292	2135.99	2054.6	81.387	1939.4	1911.19	28.21	2058.95	1830.86	228.087	1722.36	1505.28	217.073	1959.35	1883.18	76.165	1381.25	1371.81
1985.61	1859.03	126.579	1719.15	1570.14	149.009	1644.29	1618.9	25.392	1912.94	1917.34	-4.4	2018.87	1874.85	144.015	1960.05	1866.45	93.6	1782.35	1716.58	65.775	1987.88	1955.66	32.22	2030.08	1911.4	118.674	2037.92	1978.07	59.852	1942.37	1767.77	174.606	2153.93	2039.52	114.416	1933.11	1910.55	22.56	2056.44	1831.51	224.932	1692.91	1505.68	187.225	1956.15	1878.96	77.188	1383.4	1372.16
1975.21	1845.38	129.823	1703.45	1561.13	142.32	1633.29	1612.64	20.65	1915.79	1907.64	8.152	2009.73	1868.94	140.79	1950.1	1854.6	95.502	1773.58	1711.79	61.793	1961.06	1948.76	12.303	2026.72	1904.44	122.279	2030.2	1967.35	62.851	1941.21	1765.87	175.341	2150.45	2035.72	114.733	1958.32	1900.86	57.466	2045.41	1820.83	224.578	1688.92	1499.57	189.35	1973.83	1868.45	105.38	1369.46	1361.18
1962.4	1839.2	123.194	1694.17	1555.65	138.518	1632.14	1609.23	22.908	1901.21	1900.54	0.678	2000.9	1858.04	142.861	1921.78	1849.32	72.455	1766.49	1705.71	60.775	1950.11	1936.97	13.134	2009.57	1894.84	114.738	2038.36	1958.1	80.255	1919.25	1753.44	165.818	2151.88	2030.67	121.211	1932.15	1889.97	42.173	2014.99	1810.61	204.378	1694.34	1497.73	196.602	1959.59	1866.27	93.312	1373.12	1360.65
1959.13	1836.08	123.048	1680.39	1553.12	127.269	1624.34	1606.66	17.685	1894.45	1893.23	1.221	1997.49	1851.65	145.836	1916.67	1842.22	74.454	1758.99	1698.11	60.875	1952.41	1943.2	9.206	2022.76	1900.78	121.982	2030.53	1958.57	71.953	1930.95	1761.84	169.107	2120.77	2031.64	89.124	1937.66	1887.76	49.908	2000.78	1813.23	187.546	1679.5	1490.84	188.66	1929.95	1856.22	73.734	1362.09	1356.2
1954.16	1833.88	120.281	1670.48	1546.63	123.857	1613.1	1601.32	11.783	1887.63	1881.85	5.786	2004.44	1848.05	156.388	1904.55	1842.07	62.484	1757.93	1691.51	66.417	1940.91	1925.52	15.386	1997.88	1884.88	112.993	2007.53	1948.42	59.117	1921.07	1743.09	177.981	2109.91	2016.46	93.453	1910.08	1886.56	23.512	1998.92	1803.02	195.905	1675.56	1484.35	191.214	1915.4	1846.93	68.469	1346.44	1351.16
1967.74	1824.51	143.235	1667.71	1543.75	123.962	1618.72	1599.16	19.566	1874.58	1874.85	-0.273	2002.55	1845.45	157.102	1895.45	1832.3	63.152	1746.1	1689.7	56.4	1928.31	1933.21	-4.894	2011.89	1889.64	122.254	2022.71	1952	70.714	1940.87	1746.69	194.185	2116.06	2020.55	95.507	1917.45	1881.03	36.419	2007.77	1805.51	202.256	1685.71	1483.83	201.878	1938.24	1843.09	95.149	1353.97	1344.03
1940.38	1818.93	121.451	1662.53	1540.55	121.974	1609.47	1597.78	11.699	1869.53	1868.94	0.581	1997.73	1834.4	163.325	1902.26	1830.71	71.553	1723.66	1687.72	35.945	1921.75	1919.65	2.101	1975.59	1874.77	100.822	2004.43	1940.24	64.197	1915.07	1733.65	181.418	2103.41	2005.77	97.644	1919.99	1873.2	46.791	1991.15	1789.27	201.878	1682.32	1479.36	202.958	1898.5	1835.24	63.254	1349.02	1341.02
1918.26	1813.51	104.748	1645.9	1534.67	111.233	1594.96	1583.66	11.296	1852.52	1858.04	-5.513	1978.25	1832.71	145.543	1878.24	1824.04	54.193	1718.83	1675.48	43.351	1914.65	1917.76	-3.111	1962.31	1874.53	87.785	2004.75	1934.43	70.314	1941.8	1734.1	207.698	2101.26	1999.23	102.03	1915.01	1864.79	50.212	1945.32	1786.36	158.968	1683.06	1473.74	209.316	1896.82	1824.59	72.232	1343.89	1332.59
1891.45	1805	86.449	1637.58	1530.81	106.765	1610.88	1583.14	27.74	1857.12	1851.65	5.467	1959.84	1823.82	136.028	1870.63	1818.11	52.518	1721.97	1673.99	47.975	1903.92	1910.67	-6.748	1955.43	1866.61	88.817	1979.86	1923.29	56.567	1929.61	1727.52	202.085	2106.79	1991.68	115.106	1908.79	1860.39	48.4	1930.11	1783.09	147.022	1671.53	1472.17	199.367	1909.64	1818.46	91.183	1317.87	1331.59
1898.09	1805.33	92.765	1637.91	1532.45	105.462	1614.26	1583.15	31.106	1847.43	1848.05	-0.62	1944.8	1821.38	123.413	1876.03	1815.57	60.46	1731.83	1673.8	58.038	1922.82	1913.04	9.78	1971.88	1867.47	104.416	1986.05	1928.27	57.774	1904.7	1731.93	172.776	2090.29	1996	94.283	1932.61	1862.82	69.793	1952.94	1778.03	174.914	1671.28	1475.32	195.96	1905.66	1818.36	87.293	1336.35	1328.9
1926.31	1801.93	124.376	1638.83	1527.13	111.697	1619.46	1577.77	41.695	1837.53	1845.45	-7.925	1946.04	1807.48	138.557	1869.72	1813.22	56.5	1704.42	1671.17	33.247	1900.82	1907.68	-6.868	1966.43	1860.67	105.754	2010.39	1924.94	85.445	1906.82	1720.03	186.795	2100.22	1994.23	105.988	1919.69	1860.06	59.632	1955.92	1778.72	177.208	1667.1	1467.38	199.721	1888.98	1813.85	75.132	1331.42	1330.81
1916.59	1799.12	117.465	1637	1518.93	118.07	1614.28	1572.46	41.814	1842.53	1834.4	8.132	1930.82	1807.59	123.231	1877.97	1803.19	74.778	1709.42	1668	41.424	1906.5	1896.43	10.071	1929.07	1860.61	68.455	1972.65	1917.36	55.294	1890.71	1723.47	167.243	2058.42	1989.08	69.341	1939.13	1854.76	84.367	1911.42	1773.79	137.637	1651.01	1455.84	195.17	1877.01	1801.12	75.895	1318.24	1319.47
1912.96	1791.73	121.23	1617.22	1521.07	96.153	1607.66	1572.25	35.414	1843.9	1832.71	11.192	1903.61	1796.01	107.593	1872.45	1802.69	69.755	1706.74	1658.54	48.2	1893.45	1891.75	1.702	1923.88	1849.31	74.574	1978.88	1904.09	74.786	1891.11	1711.45	179.66	2054.35	1976.86	77.488	1937.54	1847.54	90.001	1941.36	1764.22	177.141	1656.22	1460.61	195.614	1859.98	1799.69	60.288	1310.13	1318.72
1891.22	1785.15	106.074	1614.11	1511.45	102.661	1597.19	1564.13	33.058	1837.81	1823.82	13.992	1896.38	1794.11	102.273	1847.73	1800.19	47.541	1688.94	1653.12	35.82	1873.27	1888.59	-15.326	1930.67	1847.37	83.301	1954.51	1910.32	44.188	1887.83	1710.91	176.923	2054.34	1975.68	78.667	1918.57	1845	73.572	1912.58	1763.84	148.743	1651.13	1456.17	194.963	1873.42	1791.17	82.253	1317.51	1309.63
1876.3	1785.9	90.406	1624.91	1514.41	110.501	1603.66	1561.44	42.213	1831.83	1821.38	10.443	1883.74	1790.09	93.644	1850.16	1789.71	60.446	1688.41	1653.15	35.263	1876.7	1881.99	-5.291	1921.67	1838.97	82.703	1957.03	1895.83	61.208	1859.25	1699.34	159.912	2039.94	1971.56	68.382	1916.5	1835.96	80.543	1940.48	1756.13	184.347	1647.83	1460.5	187.33	1852.8	1791.81	60.992	1313.54	1313.88
1868.34	1777.52	90.828	1608.38	1507.28	101.101	1595.44	1557.73	37.707	1817.12	1807.48	9.64	1861.52	1784.53	76.992	1832.77	1785.15	47.621	1689.76	1645.44	44.314	1871.39	1881.17	-9.785	1917.99	1838.73	79.265	1945.79	1892.85	52.947	1853.82	1698.09	155.726	2035.25	1967.55	67.696	1922.92	1833.02	89.893	1919.89	1753.11	166.78	1633.44	1448.04	185.402	1849.66	1784.55	65.113	1311.86	1308.02
1892.35	1772.92	119.433	1602.06	1502.55	99.508	1595.97	1556.22	39.753	1810.19	1807.59	2.597	1850.38	1778.88	71.507	1832	1785.44	46.555	1684.69	1644.54	40.155	1856.88	1874.99	-18.11	1901.77	1832.79	68.981	1951.86	1889.98	61.871	1870.75	1696.04	174.711	2023.71	1968.21	55.499	1928.03	1826.75	101.278	1914.93	1749.48	165.458	1624.72	1447.53	177.191	1839.07	1778.66	60.413	1309.76	1305.42
1875.64	1761.32	114.317	1599.41	1495.61	103.801	1591.3	1548.04	43.261	1796.52	1796.01	0.502	1831.35	1770.46	60.898	1822.3	1774.58	47.718	1667.66	1636.29	31.373	1867.61	1873.54	-5.935	1886.07	1833.15	52.921	1935.71	1886.77	48.943	1855.42	1688.94	166.473	2032.3	1953.71	78.593	1928.11	1826.03	102.08	1903.83	1742.99	160.843	1602.63	1442.85	159.783	1843.89	1773.37	70.518	1292.68	1303.28
1842.5	1760.18	82.322	1596.08	1492.16	103.919	1588.34	1540.79	47.548	1790.6	1794.11	-3.512	1827.84	1777.93	49.908	1822.14	1773.18	48.961	1665.66	1634.23	31.434	1847.79	1859.57	-11.775	1897.41	1817.33	80.084	1937.2	1875.61	61.587	1832.45	1680.58	151.866	2015.37	1942.31	73.065	1899.84	1807.83	92.011	1919.25	1741.64	177.612	1590.45	1437.51	152.94	1819.44	1764.48	54.963	1296.82	1297.62
1856.23	1759.64	96.593	1586.62	1492.25	94.369	1577.53	1541.47	36.056	1801.31	1790.09	11.22	1807.42	1781.34	26.077	1823.76	1775.45	48.311	1663.51	1632.17	31.335	1875.63	1861.78	13.855	1892.24	1824.81	67.427	1919.53	1880.34	39.195	1829.01	1683.58	145.434	2022.53	1942.45	80.076	1881.58	1821.43	60.147	1876.26	1738.72	137.534	1598.07	1440.17	157.899	1830.86	1762.32	68.54	1299.03	1297.16
1852.75	1751.54	101.203	1580.54	1493.77	86.772	1589.57	1537.19	52.382	1806.16	1784.53	21.635	1808.21	1767.95	40.251	1813.41	1762.48	50.931	1664.87	1625.64	39.229	1879.03	1846.02	33.01	1899.49	1812.86	86.628	1935.04	1870.95	64.087	1801.94	1673.63	128.313	1995.18	1934.05	61.127	1868.53	1805.11	63.416	1900.32	1729.48	170.831	1601.66	1432.75	168.916	1832.45	1765.1	67.351	1303.97	1297.23
1836.61	1743.54	93.067	1572.17	1485.76	86.409	1579.14	1537.96	41.185	1797.28	1778.88	18.403	1792.94	1764.43	28.516	1800.88	1758.31	42.566	1653.86	1618.97	34.889	1869.31	1858.29	11.018	1895.98	1819.19	76.788	1915.74	1875.22	40.525	1796.44	1678.92	117.523	1995.23	1940.83	54.397	1867.65	1810.67	56.972	1871.91	1737.97	133.938	1573.51	1431.45	142.06	1832.91	1754.09	78.822	1290.08	1291.44
1853.39	1743.06	110.335	1560.85	1483.73	77.121	1580.97	1537.4	43.57	1792.96	1770.46	22.506	1786.03	1755.93	30.097	1821.09	1754.26	66.836	1643.3	1619.3	23.994	1889.71	1850.62	39.1	1902.62	1811.13	91.487	1917.74	1867.36	50.382	1781.95	1674.04	107.914	1993.16	1933.27	59.887	1854.54	1804.38	50.159	1885.25	1726.54	158.709	1583.86	1430.35	153.519	1803.46	1748.93	54.528	1297.66	1292.24
1865.4	1745.25	120.15	1569.53	1487.85	81.679	1582.84	1540.37	42.47	1801.34	1777.93	23.409	1788.44	1762.82	25.626	1835.85	1761.91	73.941	1642.63	1626.94	15.694	1903.07	1858.3	44.763	1925.86	1819.91	105.946	1918.98	1876.72	42.263	1791.62	1679.99	111.629	1977.12	1937.41	39.718	1859.79	1815.11	44.674	1876.5	1731.78	144.718	1582.46	1431.21	151.255	1816.34	1754.1	62.243	1314.62	1291.64
1856.18	1745.53	110.651	1579.35	1492.41	86.936	1596.78	1539.65	57.133	1795.11	1781.34	13.767	1791.43	1755.19	36.241	1838.9	1766.23	72.669	1650.87	1624.75	26.121	1920.46	1850.29	70.178	1929.72	1813.55	116.173	1921.73	1873.61	48.121	1795.57	1670.92	124.648	1998.76	1926.68	72.082	1855.94	1804.1	51.842	1906.95	1731.95	175.002	1580.39	1429.89	150.499	1829.94	1754.75	75.193	1295.89	1296.27
1886.07	1733.12	152.95	1583.2	1489.38	93.826	1584.63	1533.88	50.754	1788.97	1767.95	21.011	1773.87	1751.27	22.595	1818.25	1754.42	63.83	1647.75	1618.23	29.521	1922.58	1843.71	78.872	1956.62	1808.19	148.43	1923.34	1872.16	51.178	1787.1	1670.32	116.779	1977.75	1925.55	52.195	1856.78	1804.13	52.646	1861.59	1727.03	134.56	1562.53	1424.72	137.81	1803.05	1744.55	58.501	1314.76	1288.68
1892.26	1724.08	168.179	1584.82	1479.93	104.892	1574.61	1529.12	45.485	1773.99	1764.43	9.559	1763.08	1748.5	14.578	1823.26	1745.33	77.931	1647.59	1612.07	35.526	1945.75	1836.42	109.337	1928.46	1799.81	128.648	1918.11	1857.28	60.827	1755.79	1657.63	98.163	1994.82	1912.15	82.675	1837.25	1792.24	45.008	1887.84	1717.54	170.301	1560.44	1425	135.444	1807.01	1742.24	64.771	1325.2	1286.65
1888.27	1717.91	170.361	1570.18	1475.02	95.158	1573.21	1523.44	49.776	1762.54	1755.93	6.606	1762.99	1750.7	12.284	1827.74	1740.19	87.544	1642.59	1607.19	35.394	1945.28	1829.63	115.648	1958.93	1798.24	160.689	1896.01	1853.11	42.907	1748.99	1648.7	100.289	1975.77	1912.33	63.442	1842.74	1790.12	52.621	1840.44	1715.86	124.576	1560.83	1417.36	143.465	1787.89	1741.01	46.879	1316.46	1286.09
1887.93	1714.89	173.034	1569.23	1479.61	89.615	1573.44	1524.7	48.737	1765.93	1762.82	3.114	1764.36	1744.46	19.905	1820.06	1745.35	74.715	1652.59	1603.84	48.744	1964.55	1827.77	136.778	1959.66	1795.58	164.084	1905.98	1851.64	54.341	1736.47	1645.97	90.496	1972.34	1908.23	64.115	1835.7	1790.52	45.18	1872.35	1714.37	157.98	1550.11	1422.63	127.477	1793.06	1735.63	57.43	1315.59	1282.72
1899.06	1713.4	185.659	1579.18	1475.84	103.345	1576.6	1526.02	50.574	1766.06	1755.19	10.873	1773.65	1741.83	31.819	1808.11	1743.03	65.078	1667.49	1606.01	61.475	1981.96	1821.85	160.105	1973.88	1791.16	182.719	1900.23	1849.74	50.491	1731.26	1636.38	94.874	1954.54	1909.4	45.134	1816.46	1784.55	31.913	1857.76	1714.77	142.985	1543.33	1414.98	128.35	1789.08	1727.27	61.807	1313.5	1275.75
1924.68	1708.35	216.331	1570.81	1467.94	102.868	1560.89	1514.37	46.52	1763.99	1751.27	12.716	1780.75	1738.35	42.403	1808.25	1731.47	76.772	1657.5	1599.46	58.034	1987.93	1814.38	173.55	1980.56	1785.48	195.086	1901.99	1842	59.99	1734.02	1629.96	104.062	1953.58	1901.04	52.534	1818.23	1778.51	39.724	1837.04	1704.45	132.593	1559.65	1407.78	151.862	1788.88	1731.99	56.885	1328.46	1273.44
1936.83	1697.93	238.907	1577.26	1466.76	110.499	1548.7	1510.29	38.409	1750.28	1748.5	1.776	1785.56	1742.23	43.323	1794.6	1726.05	68.553	1665.6	1590.49	75.106	1947.95	1815.87	132.079	1982.54	1786.89	195.646	1900.73	1844.5	56.228	1737.72	1625.43	112.289	1947.66	1904.74	42.928	1817.59	1777.92	39.669	1873.42	1711.35	162.074	1547.76	1401.92	145.837	1766.46	1724.82	41.642	1322.8	1271.72
1941.17	1700.86	240.314	1570.09	1462.99	107.099	1544.39	1514.12	30.269	1747.81	1750.7	-2.893	1795.41	1733.52	61.885	1774.84	1726.39	48.451	1651.77	1595.16	56.613	1942.03	1803.71	138.324	1961.25	1776.41	184.843	1906.07	1833.59	72.48	1742.71	1611.69	131.024	1934.26	1890.69	43.576	1801.39	1775.22	26.174	1825.83	1694.3	131.532	1561.84	1405.72	156.117	1762.51	1727.65	34.854	1325.9	1272.46
1942.44	1694.53	247.913	1568.39	1460.44	107.947	1546.63	1505.43	41.201	1743.47	1744.46	-0.991	1802.55	1735.48	67.071	1759.95	1720.77	39.178	1645.53	1586.41	59.122	1973.36	1802.95	170.403	1969.78	1783.33	186.453	1901.78	1836.8	64.974	1736.98	1610.25	126.729	1956.77	1889.81	66.957	1823.92	1769.97	53.948	1855.23	1694.62	160.612	1558.14	1395.67	162.476	1767	1717.38	49.615	1331.31	1268.89
1939.02	1690.95	248.077	1564.33	1458.99	105.33	1549.36	1511.21	38.141	1743.34	1741.83	1.506	1805.38	1731.99	73.391	1811.79	1720.26	91.524	1669	1587.04	81.957	1951.16	1806.38	144.783	1962.13	1783.74	178.393	1894.36	1836.96	57.405	1762.35	1607.44	154.909	1966.05	1895.26	70.795	1825.77	1772.96	52.81	1827.06	1700.24	126.816	1566.88	1396.42	170.457	1762.91	1714.69	48.215	1300.9	1267.94
1961.55	1687.87	273.681	1557.92	1455.01	102.903	1545.67	1502.21	43.455	1732.21	1738.35	-6.132	1816.03	1733.45	82.579	1799.99	1715.05	84.946	1662.7	1581.68	81.022	1936.4	1805.68	130.718	1934.24	1785.57	148.672	1892.69	1834.53	58.162	1777.18	1608.54	168.642	1951.53	1885.75	65.779	1854.99	1772.33	82.661	1825.6	1697.18	128.418	1596.52	1397.32	199.201	1767.15	1710.75	56.405	1326.63	1269.14
1951.9	1686.27	265.637	1556.99	1457.73	99.256	1537.71	1506.17	31.536	1742.26	1742.23	0.022	1815.15	1733.18	81.961	1806.21	1718.97	87.236	1661.8	1580.38	81.424	1919.95	1793.78	126.163	1896.55	1772.26	124.294	1895.81	1824.44	71.378	1791.41	1602.14	189.271	1946.67	1880.1	66.569	1840.12	1765.43	74.687	1832.47	1690.48	141.984	1584.37	1391.24	193.123	1767.24	1711.48	55.759	1309.1	1267.97
1933.86	1683.72	250.13	1563.15	1453.8	109.352	1534.6	1500	34.602	1730.73	1733.52	-2.794	1821.76	1728.03	93.727	1797.66	1714.56	83.106	1659.96	1571.44	88.518	1905.16	1797.18	107.974	1897.77	1777.33	120.449	1883.69	1830.62	53.067	1826.87	1601.22	225.656	1957.51	1882.42	75.093	1862.2	1768.7	93.493	1832.69	1688.84	143.85	1579.89	1394.85	185.041	1759.71	1707.77	51.945	1312.33	1263.58
1942.61	1682.77	259.845	1557.83	1453.83	103.999	1540.1	1497.51	42.588	1733.27	1735.48	-2.216	1818.91	1732.06	86.856	1792.01	1707.07	84.938	1647.91	1575.05	72.867	1893.11	1785.99	107.114	1918.02	1770.67	147.342	1895.17	1821.47	73.699	1842.43	1596.41	246.025	1945	1870.87	74.125	1836.27	1756.76	79.51	1842.48	1685.16	157.319	1581.84	1392.09	189.756	1757.06	1705.8	51.262	1304.56	1265.63
1883.46	1678.21	205.247	1555.09	1452.72	102.365	1544.91	1499.65	45.265	1727.35	1731.99	-4.644	1817.04	1724.67	92.371	1781.08	1709.69	71.394	1656.88	1572.5	84.388	1880.48	1795.28	85.202	1966.07	1774.75	191.325	1903.18	1823.23	79.946	1845.67	1597.4	248.274	1980.96	1878.12	102.835	1847.04	1764	83.047	1834.31	1692.77	141.543	1592.42	1388.27	204.151	1750.06	1698.12	51.939	1310.1	1261.54
1884.38	1674.68	209.7	1551.92	1452.66	99.259	1537.4	1500.78	36.628	1723.64	1733.45	-9.817	1823.74	1719.22	104.519	1779.72	1705.94	73.781	1664.8	1572.69	92.117	1873.65	1786.81	86.843	1963.18	1773.26	189.925	1914.49	1814.11	100.385	1900.01	1595.85	304.161	1955.96	1865.7	90.26	1851.2	1753.78	97.424	1855.62	1682.95	172.672	1584.16	1389.46	194.7	1773.77	1708.43	65.34	1298.9	1261.95
1825.71	1676.72	148.988	1545.25	1451.14	94.115	1533.48	1492.15	41.333	1714.66	1733.18	-18.526	1810.67	1717.07	93.601	1776.61	1706.08	70.532	1649.65	1573.29	76.362	1858.41	1793.26	65.147	1950.64	1772.9	177.737	1902.44	1825.67	76.772	1902.58	1606.31	296.275	1962.23	1878.2	84.025	1853.03	1766.06	86.965	1838.56	1689.97	148.595	1579.52	1387.59	191.925	1769.4	1702.76	66.636	1270.35	1259.01
1901.59	1670.29	231.3	1554.91	1457.22	97.687	1537.65	1495.2	42.444	1715.42	1728.03	-12.604	1809.35	1716.06	93.29	1770.33	1705.2	65.122	1649.73	1574	75.727	1845.12	1780.28	64.843	1925.56	1774.26	151.298	1909.1	1814.82	94.273	1905.9	1590.56	315.339	1950.9	1865.37	85.528	1860.25	1755.28	104.975	1829.58	1681.33	148.253	1584.17	1388.23	195.946	1761.96	1703.86	58.1	1293.29	1263.11
1895.45	1671.62	223.832	1540.02	1453.13	86.89	1529.66	1493.33	36.333	1718.51	1732.06	-13.55	1797.42	1704.25	93.167	1748.43	1702.93	45.502	1638.62	1573.2	65.422	1854.69	1786.5	68.197	1915.72	1773.08	142.636	1899.02	1810.76	88.26	1924.48	1594.9	329.572	1952.04	1867.97	84.066	1859.47	1755.79	103.675	1830.42	1681.81	148.613	1575.84	1386.06	189.782	1750.78	1695.62	55.16	1290.33	1251.13
1877.74	1669.94	207.799	1551.03	1446.54	104.487	1545.3	1493.39	51.904	1711.33	1724.67	-13.342	1793.03	1702.98	90.052	1751.75	1698.85	52.902	1629.69	1570.84	58.848	1845.11	1781.63	63.483	1902	1765.29	136.71	1892.6	1808.35	84.256	1941.44	1596.88	344.567	1956.34	1867.09	89.252	1876.02	1754.87	121.146	1826.28	1682.28	144.009	1556.96	1382.48	174.486	1759.1	1696.71	62.384	1291.18	1257.87
1835.62	1660.2	175.425	1542.64	1443.43	99.208	1536.16	1487.77	48.394	1710.64	1719.22	-8.58	1778.93	1706.69	72.244	1744.86	1691.83	53.032	1631.14	1563	68.14	1843.77	1785.41	58.363	1899.92	1772.65	127.266	1895.2	1803.28	91.923	1946.24	1595.21	351.031	1938.96	1868.06	70.909	1981.46	1754.27	227.19	1799.65	1678.73	120.916	1550.04	1375.19	174.844	1728.92	1685.76	43.158	1273.98	1248.39
1828.88	1659.55	169.329	1530.12	1443.76	86.369	1539.23	1486.16	53.068	1703.54	1717.07	-13.531	1779.78	1696.99	82.789	1740.62	1697.33	43.285	1622.36	1564.82	57.54	1818.12	1776.36	41.764	1890.95	1763.57	127.384	1894.83	1795.42	99.414	1944.72	1589.27	355.452	1936.67	1857.64	79.035	1973.95	1745.78	228.168	1804.69	1674.8	129.9	1542.27	1378.9	163.369	1732.91	1692.86	40.054	1271.29	1253.47
1810.58	1658.08	152.503	1526.24	1441.07	85.166	1534.01	1482.93	51.079	1700.6	1716.06	-15.465	1767.48	1696.62	70.87	1736.88	1689.73	47.142	1606.55	1565.72	40.822	1815.86	1771.91	43.949	1881.21	1762.62	118.596	1884.52	1799.07	85.451	1915.27	1587.44	327.82	1966.38	1858.7	107.679	1957.32	1746.73	210.585	1794.11	1672.81	121.3	1542.06	1374.89	167.164	1727.11	1684.81	42.306	1250.57	1247.47
1739.72	1652.18	87.544	1529.18	1438.8	90.38	1526.19	1479.4	46.789	1698.55	1704.25	-5.701	1745.01	1695.3	49.706	1729.58	1687.85	41.728	1620.44	1553.68	66.753	1815.83	1765.73	50.1	1879.86	1755.12	124.738	1859.01	1787.2	71.81	1885.78	1580.55	305.225	1948.89	1849.18	99.713	1935.59	1737.05	198.539	1802.31	1665.56	136.75	1521.78	1375.82	145.954	1708.31	1687.29	21.024	1271.21	1249.48
1740.09	1644.78	95.315	1530.11	1436.1	94.014	1528.84	1479.41	49.431	1705.93	1702.98	2.95	1743.2	1696.86	46.336	1729.49	1683.62	45.87	1604.33	1554.62	49.715	1811.21	1766.38	44.826	1873.5	1751.13	122.366	1864.12	1786.72	77.393	1893.61	1577.83	315.779	1930.11	1848.58	81.528	1943.02	1735.65	207.371	1805.15	1660.88	144.265	1520.98	1369.77	151.207	1703.59	1680.21	23.386	1266.36	1248.03
1799.12	1639.47	159.645	1531.9	1435.06	96.839	1524.42	1474.1	50.321	1711.27	1706.69	4.58	1732.05	1689.61	42.441	1727.77	1689.48	38.289	1602.02	1551.87	50.157	1807.52	1763.17	44.349	1855.38	1751.3	104.082	1852	1782.63	69.375	1872.44	1577.22	295.214	1923.17	1846.13	77.038	1929.62	1737.19	192.426	1804.32	1659.96	144.361	1502.77	1368.14	134.626	1710.14	1681.32	28.817	1260.28	1244.99
1774.73	1640.94	133.784	1529.09	1434.3	94.782	1514.62	1473.44	41.177	1687.83	1696.99	-9.161	1722.75	1684.82	37.937	1733.72	1680.52	53.202	1590.59	1547.41	43.173	1826.5	1760.77	65.73	1869.02	1750.14	118.881	1866.94	1784.16	82.784	1852.83	1572.75	280.079	1930.02	1846.42	83.597	1919.7	1734.81	184.893	1808.17	1663.37	144.801	1500.82	1367.43	133.392	1693.61	1678.2	15.408	1283.62	1244.31
1797.61	1637.75	159.861	1509.39	1432.15	77.244	1519.34	1470.58	48.755	1683.79	1696.62	-12.826	1715	1684.46	30.545	1732.54	1682.27	50.276	1589.54	1549.37	40.168	1853.13	1758.67	94.454	1855.98	1746.2	109.78	1847.1	1772.73	74.373	1836.84	1570.25	266.592	1899.82	1834.07	65.75	1931.9	1728.06	203.845	1800.09	1655.9	144.193	1479.34	1368.09	111.249	1698.06	1679.39	18.676	1288.6	1244.78
1791.28	1637.81	153.473	1518.9	1433.96	84.945	1519.55	1474.97	44.585	1678.12	1695.3	-17.184	1708.16	1682.69	25.464	1731.03	1676.36	54.677	1587.16	1543.67	43.496	1871.65	1759.76	111.886	1874.33	1746.28	128.045	1846.81	1777.33	69.481	1832.7	1569.79	262.91	1921.99	1840.65	81.348	1908.13	1734.25	173.88	1786.17	1656.47	129.7	1491.03	1366.15	124.875	1691.97	1672.96	19.013	1293.23	1243.31
1811.73	1634.67	177.06	1514.63	1428.1	86.529	1521.02	1472.2	48.814	1682.7	1696.86	-14.159	1710.8	1678.67	32.124	1745.8	1671.5	74.301	1593.01	1542.63	50.38	1883.31	1753.7	129.614	1875.4	1747.64	127.756	1854.9	1768.01	86.896	1826.72	1566.85	259.867	1900.11	1830.99	69.118	1886.32	1726.59	159.728	1784.72	1651.29	133.432	1493.52	1365.82	127.701	1693.56	1674.83	18.733	1318.95	1236.8
1793.37	1628.38	164.989	1502.94	1422.31	80.632	1507.16	1466.8	40.36	1673.27	1689.61	-16.345	1689.92	1683.71	6.216	1745.2	1673.87	71.332	1593.49	1540.5	52.995	1893.02	1746.35	146.67	1881.1	1740.75	140.352	1870.62	1762.53	108.09	1786.67	1563.93	222.747	1890.14	1829.15	60.995	1884.71	1725.48	159.224	1780.93	1652.66	128.272	1478.36	1359.77	118.59	1687.29	1662.06	25.228	1335.81	1235.32
1795.6	1624.79	170.806	1507.08	1424.91	82.175	1511.16	1465.83	45.332	1672.82	1684.82	-12	1672.84	1677.57	-4.728	1756.82	1671.22	85.606	1598.48	1539.94	58.538	1917.72	1746.99	170.73	1910.07	1736.62	173.448	1821.77	1761.95	59.818	1754.99	1559.01	195.985	1871.32	1827.01	44.309	1875.64	1719.15	156.482	1758.04	1648.63	109.412	1485.71	1362.81	122.905	1698.37	1668.3	30.072	1334.24	1239.69
1834.05	1622.21	211.84	1504.74	1421.24	83.507	1506.76	1467.12	39.64	1669.06	1684.46	-15.393	1669.4	1676.72	-7.322	1770.84	1671.61	99.224	1599.07	1541.99	57.085	1972.18	1748.71	223.474	1946.25	1732.93	213.318	1838.75	1765.93	72.815	1771.28	1564.67	206.61	1875.45	1833.09	42.364	1873.38	1719.69	153.686	1803.12	1647.78	155.344	1475.71	1361.57	114.142	1686.39	1666.13	20.263	1360.83	1236.37
1878.53	1624.3	254.236	1500.58	1422.6	77.984	1510	1465.22	44.778	1667.28	1682.69	-15.411	1665.26	1670.16	-4.902	1790.19	1672.2	117.995	1623.74	1546.82	76.915	1970.45	1754.04	216.411	1962.47	1741.87	220.594	1865.03	1765.09	99.934	1748.33	1563.44	184.889	1866.67	1828.51	38.159	1846.89	1716.29	130.61	1770.88	1647.07	123.805	1491.98	1362.88	129.1	1682.45	1670.88	11.572	1356.26	1240.32
1908	1623.6	284.401	1512.24	1425.63	86.609	1514.21	1469.27	44.944	1666.32	1678.67	-12.353	1668.32	1670.05	-1.728	1793.19	1670.32	122.874	1628.49	1540.11	88.382	2002.85	1757.16	245.697	1998.37	1747.16	251.206	1851.91	1774.81	77.11	1744.88	1571.39	173.491	1885.2	1838.1	47.095	1833.53	1728.56	104.973	1792.26	1652.96	139.303	1493.97	1365.25	128.717	1673.92	1668.75	5.171	1359.12	1238.14
1950.3	1620.16	330.136	1508.51	1422.76	85.755	1506.56	1466.36	40.198	1661.6	1683.71	-22.11	1683.29	1665.49	17.799	1816.18	1669.94	146.246	1648.83	1536.47	112.359	2018	1742.15	275.849	2015.31	1734.3	281.012	1827.24	1759.65	67.588	1731.52	1562.82	168.706	1853.08	1827.02	26.057	1823.57	1710.27	113.308	1764.71	1644.07	120.633	1516.1	1365.58	150.522	1706.4	1665.2	41.2	1386.65	1235.73
1970.27	1619.15	351.116	1505.83	1419.15	86.678	1501.47	1465.13	36.335	1655.24	1677.57	-22.331	1710.35	1670.9	39.451	1820.17	1665.97	154.192	1671.03	1538.29	132.74	2027.32	1748.77	278.551	2051.34	1738.64	312.709	1831.64	1764.02	67.619	1727.73	1561.68	166.052	1862.42	1829.95	32.465	1806.66	1724.06	82.599	1796.22	1644.32	151.902	1528.81	1362.67	166.139	1717.51	1666.98	50.533	1391.98	1236.7
2001.5	1624.76	376.738	1498.31	1420.42	77.884	1494.44	1464.38	30.064	1654.35	1676.72	-22.373	1741.79	1662.67	79.125	1817.9	1670.64	147.263	1695.5	1543.36	152.14	2059.2	1745.35	313.853	2058.1	1738.77	319.334	1824.3	1766.84	57.465	1699.16	1562.58	136.584	1887.07	1825.76	61.31	1782.64	1715.98	66.659	1752.48	1641.83	110.654	1535.01	1363.92	171.094	1713.13	1667.38	45.75	1417.1	1235.23
1964.28	1618.21	346.074	1499.88	1420.39	79.497	1495.93	1464.93	31.005	1657.78	1670.16	-12.383	1752.12	1663.55	88.571	1807.76	1664.93	142.835	1710.85	1536.4	174.448	2067.17	1749.57	317.606	2121.01	1737.88	383.13	1852.54	1763.28	89.26	1719.93	1563.1	156.827	1906.38	1831.29	75.087	1791.94	1725.88	66.062	1779.22	1646.73	132.485	1535.89	1359.18	176.714	1720.88	1663.53	57.349	1409.11	1232.66
2020.47	1617.98	402.487	1503.64	1419.7	83.933	1498.7	1466.53	32.167	1657.28	1670.05	-12.77	1772.89	1664.41	108.484	1790.5	1665.68	124.814	1716.6	1543.12	173.477	2037.16	1743.76	293.394	2104.2	1733.27	370.932	1836.83	1764.09	72.742	1695.25	1559.2	136.054	1887.38	1823.41	63.973	1777.23	1717.8	59.426	1771.09	1642.78	128.304	1562.16	1362.5	199.666	1710.61	1662.5	48.108	1398.08	1235.55
1985.43	1614.49	370.941	1498.24	1420.84	77.401	1489.7	1459.32	30.383	1655.79	1665.49	-9.708	1788.02	1659.7	128.324	1802.21	1665.01	137.203	1744.3	1537.42	206.88	2040.56	1741.84	298.72	2096.17	1733.49	362.676	1862.24	1760.76	101.485	1680.8	1560.03	120.774	1904.09	1828.16	75.932	1781.55	1712.99	68.556	1768.01	1648.86	119.158	1558.91	1359.37	199.532	1726.78	1659.11	67.674	1379.75	1232.72
1794.26	1622.35	171.906	1500.33	1418.46	81.871	1503.43	1464.43	39.004	1658.84	1670.9	-12.057	1808.03	1656.61	151.419	1799.72	1668.69	131.037	1761.58	1538.55	223.033	2022.23	1747.93	274.298	2116.27	1738.13	378.144	1868.17	1764.13	104.045	1671.28	1562.34	108.934	1922.21	1828.42	93.793	1795.4	1718.19	77.215	1771.72	1648.64	123.077	1584.84	1360.58	224.263	1741.91	1657.04	84.872	1391.17	1233.27
1807.77	1612.13	195.642	1498.58	1411.44	87.135	1500.07	1458.59	41.482	1644.4	1662.67	-18.269	1828.21	1656.51	171.704	1784.67	1663.8	120.863	1770.97	1533.33	237.645	2021.8	1747.04	274.761	2136.31	1736.45	399.851	1877.42	1759.29	118.138	1676	1560.23	115.771	1921.9	1828.64	93.259	1773.64	1718.74	54.894	1768.54	1641.98	126.563	1580.57	1359.17	221.399	1724.52	1659.05	65.471	1369.34	1235.78
2012.68	1613.8	398.884	1494.55	1414.32	80.234	1507.66	1462.26	45.405	1657.44	1663.55	-6.112	1831.06	1652.93	178.13	1764.57	1663.53	101.045	1750.39	1531.57	218.822	2018.59	1740.02	278.566	2083.99	1734.35	349.646	1862.55	1753.95	108.598	1705.07	1558.59	146.477	1949.17	1820.46	128.71	1786.13	1711.93	74.205	1775.98	1640.85	135.135	1596.66	1355.92	240.742	1735.55	1662.85	72.702	1373.16	1230.02
2021.35	1611.77	409.576	1484.95	1414.27	70.685	1503.3	1454.24	49.058	1654.65	1664.41	-9.76	1852.01	1652.48	199.53	1735.24	1660.11	75.128	1736.43	1529.25	207.176	1999.51	1735.85	263.659	2080.83	1725.3	355.527	1859.85	1752.45	107.397	1709.1	1552.63	156.468	1955.38	1817.36	138.029	1791.87	1710.1	81.777	1770.18	1640.97	129.211	1602.38	1349.94	252.44	1729.15	1653.04	76.114	1348.91	1229.7
1993.79	1605.68	388.114	1486.84	1407.97	78.866	1510.02	1454.47	55.545	1646.15	1659.7	-13.545	1846.59	1646.34	200.25	1737.52	1660.2	77.321	1743.47	1533.25	210.216	1942.27	1735.45	206.82	2085.15	1725.35	359.801	1870.39	1753.71	116.68	1705.76	1551.22	154.539	1981.87	1816.46	165.414	1820.95	1706.66	114.286	1785	1639.07	145.926	1592.21	1352.34	239.878	1735.49	1658.51	76.984	1356.34	1229.2
1899.19	1607.72	291.47	1494.34	1411.47	82.865	1517.69	1451.76	65.936	1650.55	1656.61	-6.064	1845.53	1649.69	195.835	1730.32	1656.33	73.989	1707.73	1527.06	180.673	1949.41	1730.87	218.545	2073.12	1719.07	354.055	1879.7	1749.41	130.292	1709.57	1548.23	161.344	1989.62	1812.46	177.162	1838	1702.41	135.585	1755.84	1634.98	120.861	1610.69	1348.08	262.616	1724.54	1646.54	78	1357.63	1223.14
1870.98	1616.08	254.906	1494.14	1413.62	80.522	1528.63	1456.2	72.429	1652.72	1656.51	-3.781	1810.55	1642.08	168.47	1717.18	1662.06	55.119	1660.21	1532.97	127.242	1958.7	1728.63	230.065	2032.93	1718.25	314.68	1873.07	1744.9	128.167	1712.77	1545.81	166.961	1992.78	1814.13	178.645	1839.06	1697.67	141.391	1773.71	1632.43	141.285	1596.49	1351.55	244.934	1737.82	1650	87.818	1346.64	1225.23
1944.19	1610.06	334.135	1477.95	1410	67.955	1525.6	1451.42	74.172	1670.31	1652.93	17.377	1796.17	1642.54	153.635	1716.81	1654.95	61.857	1641.82	1528.02	113.806	1923.12	1735.37	187.745	2042.59	1726.06	316.531	1892.54	1742.73	149.808	1742.53	1549.85	192.677	1989.79	1812.21	177.576	1883.25	1703.17	180.084	1788.82	1636.64	152.182	1597.22	1347.97	249.247	1723.25	1650.8	72.455	1333.84	1221.08
1939.68	1610.81	328.872	1482.17	1410.17	72.001	1529.08	1449.79	79.287	1672.38	1652.48	19.901	1808.34	1637.27	171.074	1694.1	1654.73	39.375	1593.62	1529.96	63.667	1937.12	1728.15	208.974	1951.07	1725.86	225.206	1906.61	1741.6	165.014	1754.25	1547.46	206.789	2006.39	1806.12	200.269	1905.68	1707.58	198.093	1795.33	1636.77	158.565	1602.36	1350.18	252.174	1738.52	1649.6	88.922	1328.55	1226.34
1896.53	1602.3	294.233	1477.88	1400.75	77.128	1540.36	1439.14	101.219	1666.31	1646.34	19.969	1838.23	1644.9	193.327	1693.21	1649.77	43.437	1584.9	1524.55	60.352	1903.62	1734.86	168.761	1943.9	1721.94	221.96	1881.8	1748.84	132.961	1759.76	1547.69	212.062	2005.15	1818.74	186.408	1886.84	1710.57	176.262	1782.48	1635.65	146.83	1565.88	1347.87	218.009	1738.08	1646.24	91.84	1309.03	1224.84
1882.79	1606.68	276.109	1478.69	1405.49	73.196	1556.63	1443.59	113.046	1682.62	1649.69	32.921	1830.22	1639.47	190.749	1697.81	1655.93	41.878	1601.71	1525.14	76.571	1881.54	1728.38	153.163	1942.12	1712.74	229.375	1878.36	1742.92	135.439	1806.18	1545.27	260.906	2011.46	1810.76	200.697	1929.12	1701.71	227.41	1788.2	1631.62	156.572	1576.61	1350.14	226.472	1721.9	1649.04	72.855	1305.29	1224.37
1885.88	1596.94	288.937	1473.77	1398.65	75.118	1560.06	1445	115.056	1678.71	1642.08	36.625	1827.33	1637.66	189.671	1690.35	1647.56	42.788	1684.06	1524.02	160.045	1865.05	1732.62	132.434	1897.22	1718.68	178.536	1868.51	1741.63	126.879	1802.15	1537.69	264.456	2016.01	1807.1	208.915	1968.42	1696.58	271.833	1770.51	1632.62	137.891	1585.38	1348.42	236.961	1713.37	1645.03	68.34	1290.45	1218.46
1875.44	1605.74	269.697	1494.13	1401.4	92.735	1564.37	1436.43	127.945	1690.57	1642.54	48.03	1815.11	1625.97	189.142	1680.52	1650.06	30.455	1652.09	1526.23	125.863	1841.3	1725.04	116.259	1918.84	1715.86	202.984	1866.7	1739.94	126.762	1798.02	1542.06	255.968	2016.49	1801.95	214.543	1964.47	1701.95	262.519	1767.72	1630.24	137.483	1578.79	1345.98	232.81	1713.42	1652.45	60.967	1292.4	1218.05
1841.24	1597.52	243.713	1487.2	1396.64	90.569	1557.02	1436.92	120.098	1677.59	1637.27	40.325	1790.56	1631.81	158.746	1662.56	1646.09	16.47	1628.66	1518.08	110.579	1832.81	1725.26	107.551	1905.93	1714.86	191.07	1849.71	1736.31	113.396	1795.75	1539.49	256.261	1968.96	1802.01	166.954	1930.24	1693.54	236.698	1762.95	1627.23	135.713	1573.81	1349.15	224.656	1712	1643.38	68.616	1284.29	1220.99
1841.49	1602.17	239.316	1495.86	1403.17	92.692	1558.23	1442.65	115.585	1680.1	1644.9	35.2	1788.5	1623.57	164.93	1667.59	1653.21	14.378	1649.93	1526.3	123.63	1838.47	1733.82	104.642	1897.58	1715.33	182.244	1854.01	1741.2	112.807	1802.08	1538.52	263.559	1990.3	1806.88	183.414	1963.78	1697.78	266.005	1783.11	1631.39	151.717	1567.35	1348.46	218.89	1710.98	1651.72	59.269	1283.68	1222.48
1834.72	1595.31	239.408	1493.56	1402.91	90.649	1562.71	1433.77	128.941	1674.94	1639.47	35.463	1777.97	1627.86	150.103	1654.43	1647.16	7.277	1636.57	1525.5	111.063	1831.07	1729.89	101.178	1925.71	1714.56	211.149	1856.27	1740.28	115.992	1812.28	1543.34	268.939	1976.31	1806.56	169.743	1909.17	1691.15	218.021	1773.56	1633.64	139.92	1567.29	1345.02	222.271	1700.24	1642.28	57.963	1274.97	1220.33
1818.49	1600.36	218.129	1487.77	1401.58	86.184	1554.87	1431.77	123.1	1673.33	1637.66	35.673	1768.31	1625.97	142.341	1662.77	1645.69	17.079	1632.58	1526.38	106.194	1806.46	1725.55	80.919	1885.8	1708.88	176.927	1842.44	1730.62	111.825	1802.06	1532.42	269.641	1943.09	1798.58	144.508	1926.84	1688.55	238.287	1718.49	1623.97	94.522	1564.19	1346.18	218.011	1710.79	1641.24	69.548	1263.01	1217.62
1792.98	1592.2	200.775	1482.27	1388.01	94.262	1538.72	1426.71	112.015	1664.08	1625.97	38.113	1748.09	1619.87	128.216	1656.92	1637.15	19.769	1589.96	1517	72.962	1801.82	1724.61	77.21	1882.59	1707.73	174.861	1833.71	1732.32	101.393	1797.83	1532.3	265.526	1926.08	1796.52	129.568	1887.72	1686.8	200.926	1743.83	1624.46	119.373	1563.44	1341.1	222.346	1690.12	1635	55.123	1256.88	1214.92
1757.95	1590.65	167.306	1470.4	1388.42	81.982	1550.44	1427.93	122.509	1667.58	1631.81	35.765	1744.17	1617.91	126.26	1667.98	1639.03	28.954	1596.5	1517.26	79.242	1788.32	1714	74.322	1850.47	1698.08	152.392	1821.94	1724.23	97.711	1760.15	1528.49	231.659	1911.18	1785.85	125.333	1935.94	1682.92	253.018	1703.22	1618.1	85.123	1540.2	1336.1	204.104	1674.17	1637.6	36.568	1259.77	1220.71
1780.79	1587.49	193.3	1478.36	1389.92	88.442	1540.55	1424.63	115.924	1661.05	1623.57	37.477	1734.71	1622.96	111.751	1669.98	1638.05	31.936	1584.95	1517.43	67.528	1795.69	1713.53	82.159	1859.02	1700.26	158.76	1830.26	1723.43	106.83	1780.5	1529.05	251.453	1906.83	1790.27	116.558	1889.88	1684.09	205.79	1749.71	1620.05	129.658	1539.17	1336.03	203.136	1679.77	1634.41	45.366	1252.56	1217.53
1756.95	1590.98	165.977	1477.79	1394.35	83.443	1522.98	1423.69	99.286	1653.56	1627.86	25.691	1731.07	1615.07	116.003	1666.41	1635.49	30.918	1560.32	1516.37	43.951	1781.86	1711.79	70.072	1841.39	1695.64	145.758	1814.05	1720.62	93.435	1738.49	1523.93	214.558	1896.49	1786.06	110.431	1899.77	1681.79	217.98	1741.85	1616.9	124.947	1539.97	1339.39	200.575	1678.08	1634.03	44.049	1259.33	1220.98
1711.08	1588.37	122.709	1477.62	1390.73	86.885	1519.18	1418.81	100.378	1650.95	1625.97	24.982	1713.69	1618.45	95.245	1713.21	1634.32	78.894	1548.46	1521.05	27.413	1794.72	1716.17	78.552	1868.71	1702.77	165.942	1802.78	1727.53	75.247	1693.02	1529.7	163.321	1895.93	1790.19	105.743	1912.81	1682.77	230.04	1733.23	1618.18	115.051	1525.99	1336.95	189.039	1658.52	1627.86	30.659	1256.38	1218.74
1682.86	1583.05	99.804	1476.79	1390.03	86.759	1508.28	1419.31	88.97	1638.26	1619.87	18.394	1704.84	1607.95	96.887	1736.92	1628.42	108.491	1533.47	1513.34	20.129	1789.78	1712.24	77.54	1830.97	1699.82	131.149	1824.66	1722.74	101.916	1661.45	1524.27	137.18	1876.38	1786.64	89.737	1885.59	1680.47	205.113	1727.16	1614.29	112.873	1510.37	1338.52	171.844	1658.16	1629.31	28.846	1248.35	1216.43
1771.53	1587.64	183.886	1472.48	1385.47	87.013	1499.41	1414.92	84.484	1631.91	1617.91	13.998	1694.07	1607.29	86.777	1763.16	1627.9	135.261	1531.36	1522.68	8.673	1825.33	1712.03	113.3	1862.19	1694.64	167.547	1807.41	1720.91	86.499	1733.53	1524.05	209.478	1884.96	1783.43	101.53	1875.85	1675.3	200.555	1710.61	1614.56	96.047	1493.69	1334.68	159.009	1674.39	1625.83	48.563	1244.22	1217.08
1810.12	1586.7	223.422	1481.77	1385.71	96.058	1510.49	1415.35	95.14	1630.69	1622.96	7.733	1676.61	1605.93	70.68	1788.91	1634.87	154.041	1564.45	1520.78	43.671	1825.44	1710.47	114.976	1862.42	1694.95	167.476	1782.56	1714.71	67.855	1710.63	1517.51	193.116	1848.63	1783.27	65.355	1836.38	1673.81	162.572	1708.29	1610.89	97.403	1503.91	1340.69	163.211	1670.71	1626.92	43.783	1232.08	1219.67
1830.46	1581.28	249.187	1473.53	1383.13	90.399	1496.6	1412.23	84.371	1620.16	1615.07	5.096	1645.82	1606.24	39.586	1792.26	1625.65	166.604	1573.7	1522.16	51.545	1871.58	1702.11	169.468	1881.68	1688.34	193.341	1781.35	1714.6	66.746	1711.95	1521.56	190.391	1862.35	1783.68	78.666	1821.96	1671.38	150.577	1713.22	1608.86	104.361	1484.89	1332.77	152.118	1661.18	1623.6	37.572	1237.75	1217.44
1837.73	1578.98	258.757	1473.74	1382.6	91.136	1485.04	1413.04	71.998	1620.63	1618.45	2.177	1621.49	1605.06	16.438	1830.26	1624.46	205.798	1554.69	1523.62	31.07	1872.29	1702.53	169.762	1882.45	1683.43	199.02	1780.06	1710.71	69.342	1717.69	1517.97	199.714	1839.89	1777.67	62.219	1793.67	1672.09	121.582	1703.82	1607.64	96.178	1481.22	1332.38	148.839	1669.48	1625.35	44.128	1241.2	1217.6
1843.61	1579.12	264.491	1468.36	1384.19	84.166	1471.34	1404.86	66.486	1614.54	1607.95	6.583	1609.25	1602.61	6.636	1835.55	1617.25	218.295	1552.19	1515.85	36.335	1892.44	1705.5	186.942	1904.74	1688.17	216.575	1779.23	1713.55	65.678	1693.88	1517.06	176.825	1826.04	1777.83	48.206	1779.69	1673.39	106.305	1693.34	1609.33	84.009	1475.59	1333.14	142.455	1675.61	1623.63	51.984	1242.75	1213.36
1870.57	1575.83	294.744	1468.77	1380.78	87.994	1467.51	1403.84	63.677	1612.47	1607.29	5.178	1675.01	1598.44	76.573	1840.68	1622.77	217.913	1542.33	1517.45	24.879	1896.1	1699.58	196.518	1911.67	1685.36	226.303	1777.61	1710.26	67.353	1664.27	1514.07	150.2	1814.71	1781.72	32.992	1772.64	1666.01	106.634	1722.46	1606	116.463	1466.1	1330.63	135.466	1686.59	1614.83	71.752	1234.95	1212.37
1905.25	1577.09	328.16	1482.59	1379.18	103.402	1457.53	1397.88	59.652	1617.06	1605.93	11.132	1662.15	1603.12	59.031	1867.84	1615.65	252.193	1571.47	1512.42	59.05	1932.42	1703.86	228.564	1853.07	1685.5	167.57	1782.99	1708.32	74.673	1668.36	1516.21	152.155	1815.64	1774.6	41.035	1790.57	1669.94	120.633	1696.43	1608.05	88.381	1453.44	1331.91	121.532	1676.09	1625.15	50.935	1236.53	1209.76
1951.34	1578.37	372.967	1487.04	1382.12	104.924	1456.9	1401.43	55.466	1621.47	1606.24	15.238	1656.17	1601.4	54.769	1871.17	1616.77	254.404	1566.96	1518.04	48.917	1931.16	1701.02	230.142	1816.65	1690.58	126.077	1772.36	1711.29	61.071	1664.33	1512.05	152.283	1821.88	1775.77	46.11	1768.01	1667.02	100.991	1708.73	1612.45	96.282	1463.27	1335.31	127.955	1695.6	1617.62	77.975	1234.64	1206.96
1981.87	1576.96	404.904	1484.16	1375.64	108.525	1448.43	1394.1	54.337	1622.53	1605.06	17.478	1659.32	1600.46	58.856	1871.18	1613.13	258.049	1547.82	1514.9	32.911	1947.46	1703.22	244.239	1794.67	1683.61	111.063	1774.35	1712.38	61.978	1658.37	1514.94	143.43	1822.36	1766.76	55.604	1729.96	1668.95	61.014	1709.28	1602.41	106.87	1455.34	1328.97	126.372	1696.17	1613.49	82.685	1239.92	1209.14
1988.42	1571.16	417.256	1479.85	1374.26	105.59	1457	1391.08	65.917	1625.22	1602.61	22.61	1644.67	1595.41	49.255	1867.05	1611.34	255.709	1531.84	1512.28	19.564	1953.14	1697.65	255.489	1788.76	1678.56	110.194	1784.04	1697.05	86.984	1644.79	1507.45	137.335	1814.73	1766.34	48.395	1763.37	1659.78	103.592	1698.03	1597.16	100.86	1446.05	1326.57	119.483	1708.53	1613.11	95.422	1231.79	1204.81
1965.67	1570.03	395.646	1476.11	1375.25	100.855	1444.91	1387.87	57.041	1621.03	1598.44	22.595	1635.15	1595.36	39.787	1856.16	1608.69	247.467	1543.45	1505.06	38.388	1951.16	1701.33	249.832	1822.33	1676.74	145.588	1772.35	1703.33	69.018	1626.37	1509.11	117.257	1792.78	1772.63	20.147	1743.63	1662.65	80.982	1696.57	1593.25	103.321	1435.96	1322.83	113.126	1700.98	1605.67	95.31	1229.82	1198.56
1969.37	1579.19	390.182	1489.44	1377.55	111.893	1442.32	1388.1	54.221	1631.09	1603.12	27.964	1633.21	1595.22	37.988	1863.16	1614.53	248.633	1573.85	1508.57	65.278	1947.97	1695.69	252.279	1845.69	1676.82	168.878	1787.22	1698.78	88.448	1612.84	1509.68	103.157	1790.81	1760.14	30.665	1753.24	1653.6	99.644	1678.5	1594.65	83.854	1433.33	1323.49	109.844	1705.99	1611.74	94.247	1252.21	1206.19
1921.26	1571.92	349.339	1480.6	1374.57	106.026	1434.99	1387.81	47.181	1640.27	1601.4	38.864	1651.44	1588.49	62.953	1837.95	1613.82	224.135	1577.81	1510.06	67.751	1958.76	1694.39	264.363	1879.7	1678.87	200.83	1788.05	1700.07	87.989	1611.53	1507.88	103.651	1805.15	1761.26	43.893	1725.59	1653.67	71.919	1684.97	1596.85	88.115	1433.57	1322.87	110.708	1727.57	1610.4	117.176	1245.88	1203.26
1890.4	1576.21	314.188	1492.58	1374.41	118.161	1440.87	1384.85	56.021	1649.77	1600.46	49.307	1660.17	1586.94	73.231	1850.4	1615.23	235.171	1572.68	1508.93	63.752	1933.94	1693.75	240.19	1866.87	1670.49	196.383	1789.71	1694.96	94.749	1601.54	1504.23	97.312	1809.87	1753.15	56.719	1739.37	1651.98	87.388	1688.87	1588.4	100.471	1432.49	1329.25	103.245	1737.53	1610.55	126.982	1240.76	1202.45
1903.9	1566.22	337.671	1486.5	1367.16	119.341	1429.18	1379.48	49.702	1654.23	1595.41	58.817	1657.04	1594.12	62.923	1817.02	1605.4	211.614	1553.06	1502.76	50.299	1932.51	1697.8	234.709	1869.62	1675.98	193.645	1782.58	1698.09	84.487	1608.85	1501.65	107.193	1802.91	1761.32	41.59	1716.63	1654.24	62.389	1682.03	1590.46	91.578	1428.64	1322.08	106.555	1731.95	1604.11	127.842	1229.94	1197.96
1797.86	1571.21	226.64	1486.78	1371.63	115.144	1433.23	1379.18	54.047	1672.5	1595.36	77.135	1673.36	1590.61	82.756	1822	1604.62	217.376	1554.65	1506.37	48.279	1908.47	1693.55	214.925	1864.52	1666.74	197.784	1778.03	1692.89	85.143	1583.92	1502.81	81.117	1793.64	1755.3	38.343	1720.06	1648.41	71.643	1683.31	1592.59	90.723	1423.17	1317.84	105.332	1736.27	1604.28	131.994	1223.78	1199.2
1786.5	1566.5	219.998	1475.6	1363.04	112.561	1428.06	1371.41	56.646	1667.11	1595.22	71.885	1675.64	1585.93	89.713	1790.79	1603.12	187.674	1546.69	1500	46.686	1892.54	1692.46	200.086	1870.8	1669.6	201.194	1785.63	1696.5	89.127	1592.74	1502.35	90.388	1788.87	1753.78	35.09	1734.27	1653.29	80.985	1701.5	1589.59	111.91	1421.18	1312.63	108.555	1741.6	1602.85	138.751	1226.32	1190.02
1848.66	1566.65	282.004	1480.57	1364.07	116.494	1425.48	1368.54	56.939	1669.35	1588.49	80.865	1681.52	1584.6	96.922	1789.88	1604.92	184.964	1544.77	1501.82	42.952	1893.82	1693.61	200.217	1868.16	1663.07	205.096	1774.6	1690.33	84.271	1587.45	1496.98	90.471	1789.48	1755.72	33.754	1745.98	1646.95	99.026	1732.9	1582.92	149.985	1419.43	1318.48	100.944	1738.16	1605.64	132.518	1219.43	1195.92
1879.43	1563.68	315.746	1470.1	1356.12	113.974	1414.39	1362.03	52.36	1676.36	1586.94	89.418	1684.38	1590.88	93.491	1762.15	1596.98	165.163	1548.4	1497.11	51.285	1885.89	1692.4	193.493	1851	1666.61	184.388	1785.24	1687.92	97.317	1579.49	1497.16	82.326	1785.96	1752.37	33.592	1772.93	1650.06	122.878	1715.73	1584.14	131.588	1428.57	1308.96	119.602	1727.8	1600.01	127.786	1214.97	1191.35
1881.3	1571.52	309.786	1482.27	1357.34	124.923	1426.2	1366.8	59.398	1682.44	1594.12	88.319	1696.41	1588.44	107.97	1738.43	1606.44	131.983	1567.24	1505.07	62.17	1844.22	1688.54	155.681	1831.26	1669.45	161.807	1773.94	1687.35	86.595	1577.62	1504.25	73.365	1794.52	1754.13	40.388	1788.97	1650.28	138.684	1734.5	1582.33	152.17	1432.78	1316.04	116.74	1729.97	1606.04	123.927	1232.48	1196.62
1822.97	1569.31	253.658	1475.92	1355.76	120.163	1414.6	1361.78	52.816	1683.44	1590.61	92.83	1685.14	1587.23	97.905	1731.14	1600.89	130.253	1566.52	1498.67	67.857	1844.78	1691.47	153.313	1793.72	1666.79	126.935	1784.8	1691.46	93.343	1586.4	1498.71	87.688	1795	1756.96	38.046	1797.55	1651.18	146.374	1728.21	1582.37	145.836	1429.65	1313.03	116.617	1726.21	1601	125.206	1218.83	1191.98
1824.87	1564.56	260.307	1469.01	1359.16	109.854	1406.72	1358.5	48.218	1682.32	1585.93	96.393	1682.17	1581.53	100.642	1732	1601.33	130.668	1552.92	1498.05	54.872	1835.01	1688.49	146.524	1826.87	1674.95	151.912	1783.18	1687.51	95.677	1585.8	1495.79	90.003	1799.38	1749.37	50.017	1818.06	1643.92	174.137	1700.9	1582.64	118.263	1442.85	1313.97	128.877	1725.96	1594.76	131.193	1227.07	1194.17
1794.97	1567.55	227.421	1472.62	1352.74	119.884	1407.69	1362.56	45.135	1675.74	1584.6	91.139	1693.64	1583.63	110.002	1720.35	1597.05	123.298	1556.75	1498.68	58.067	1829.02	1687.69	141.334	1778.66	1669.8	108.862	1766.3	1687.58	78.715	1600.75	1493.27	107.476	1795.26	1754.79	40.47	1822.06	1645.85	176.208	1723.81	1581.3	142.51	1445.54	1310.75	134.784	1721.18	1595.32	125.856	1222.35	1198.18
1783.29	1565.7	217.583	1462.13	1361.94	100.188	1414.14	1359.82	54.324	1677.35	1590.88	86.468	1696.28	1576.82	119.462	1716.03	1604.64	111.394	1533.29	1499.47	33.825	1802.86	1686.2	116.659	1787.31	1664.43	122.876	1765.49	1691.82	73.673	1598.31	1495.93	102.376	1778.43	1744.03	34.4	1846.69	1646.77	199.917	1721.36	1580.44	140.917	1462.48	1310.26	152.213	1692.79	1600.92	91.873	1220.27	1194.51
1741.13	1560.67	180.455	1470.9	1357.36	113.543	1414.35	1354.98	59.36	1671.19	1588.44	82.748	1694.92	1579.88	115.04	1714.89	1599.39	115.506	1532.88	1492.76	40.119	1787.53	1685.73	101.797	1786.07	1667.07	119.008	1765.55	1684.93	80.61	1616.26	1490.52	125.741	1788.09	1747.82	40.27	1863.59	1640.81	222.779	1721.95	1577.33	144.624	1454.01	1314.55	139.457	1683.88	1596.94	86.937	1205.09	1191.78
1666.84	1564.04	102.802	1461.3	1362.76	98.543	1421.04	1360.96	60.08	1671.91	1587.23	84.676	1686.82	1580.96	105.861	1699.32	1602.97	96.348	1528.68	1499.97	28.707	1802.56	1678.47	124.087	1786.76	1668.86	117.903	1757.73	1682.48	75.251	1594.16	1490.28	103.881	1796.7	1742.97	53.73	1878.14	1645.41	232.724	1720.3	1579.64	140.663	1470.36	1316.71	153.646	1681.93	1597.04	84.89	1207.11	1193.07
1688.55	1562.71	125.841	1464.89	1357.87	107.018	1422.27	1350.39	71.879	1657.37	1581.53	75.846	1679.12	1576.41	102.709	1681.05	1595.59	85.46	1507.35	1492.16	15.194	1791.62	1687.69	103.935	1797.1	1670.81	126.281	1751.78	1686.25	65.531	1600.27	1489.18	111.09	1785.92	1750.31	35.617	1872.22	1644.44	227.785	1731.24	1577.6	153.639	1472.83	1311.7	161.13	1658	1596.14	61.859	1202.9	1191.87
1748.74	1562.05	186.688	1465.86	1358.92	106.943	1413.98	1349.89	64.094	1645.68	1583.63	62.046	1670.61	1578.76	91.85	1669.01	1596.15	72.861	1508.35	1491.16	17.187	1757.89	1678.67	79.225	1732.89	1659.18	73.713	1743.89	1677.09	66.798	1598.44	1485.77	112.676	1778.95	1743.12	35.834	1856.17	1632.67	223.496	1703.21	1571.86	131.351	1466.35	1310.67	155.677	1649.03	1592.06	56.974	1203.41	1190.72
1713.91	1563.39	150.52	1462.35	1353.06	109.281	1408.98	1349.1	59.88	1644.35	1576.82	67.538	1668.25	1579.94	88.301	1661.59	1589.71	71.878	1503.58	1492.73	10.849	1753.88	1674.6	79.281	1746.23	1661.57	84.664	1746.42	1676.93	69.485	1610.14	1488.22	121.924	1772.72	1742.7	30.018	1877.67	1634.21	243.461	1674.83	1573.49	101.341	1479.27	1309.17	170.1	1639.23	1592.88	46.354	1209.8	1188.72
1669.78	1561.87	107.914	1465.2	1356.65	108.554	1411.18	1344.24	66.933	1635.82	1579.88	55.946	1658.66	1570.16	88.501	1656.82	1598.65	58.169	1500.57	1491.17	9.399	1762.64	1675.29	87.345	1732.2	1660.66	71.545	1762.3	1672.83	89.471	1604.68	1481.95	122.732	1785.55	1732.28	53.269	1847.61	1634.3	213.313	1683.76	1567.01	116.754	1465.6	1307.07	158.533	1636	1592.65	43.348	1199.08	1191.53
1633.56	1559.03	74.524	1458.36	1356.87	101.486	1407.45	1350.09	57.365	1627.68	1580.96	46.717	1660.8	1571.08	89.721	1646.04	1592.48	53.552	1505.94	1493.05	12.888	1741.12	1673.39	67.727	1739.22	1660.61	78.607	1735.67	1675.21	60.462	1605.33	1483.68	121.652	1767.32	1741.47	25.851	1845.19	1632.64	212.553	1686.27	1566.84	119.438	1457.19	1305.09	152.096	1630.03	1584.72	45.308	1190.66	1186.73
1694.69	1565.21	129.475	1452.7	1356.15	96.545	1407.42	1344.72	62.697	1622.79	1576.41	46.384	1650.48	1564.59	85.885	1647.79	1591.78	56.006	1499.52	1488.92	10.595	1744.15	1671.64	72.505	1736.32	1653.21	83.108	1732.58	1674.83	57.752	1604.21	1478.59	125.622	1766.51	1734.12	32.392	1856.62	1631.7	224.922	1651.71	1562.75	88.952	1454.63	1305.17	149.458	1618.56	1586.82	31.742	1187.33	1185.4
1749.82	1558.28	191.542	1446.65	1350.35	96.303	1397.95	1339.72	58.226	1609.93	1578.76	31.172	1642.53	1572.15	70.383	1647.14	1587.35	59.787	1517.35	1485.15	32.2	1749.92	1673.21	76.707	1736.89	1664.22	72.679	1731.11	1676.4	54.709	1600.61	1484.17	116.439	1765.99	1734.91	31.08	1841.36	1636.28	205.087	1630.62	1571.04	59.577	1450.55	1298.88	151.672	1618.7	1585.05	33.649	1192.96	1181.74
1742.73	1559.92	182.812	1451.21	1355.97	95.239	1396.38	1345.28	51.1	1610.68	1579.94	30.736	1642.09	1562.35	79.74	1653.57	1592.76	60.809	1492.87	1490.2	2.663	1751.02	1670.86	80.157	1736.42	1654.53	81.886	1727.66	1671.66	56.004	1606.04	1482.63	123.408	1766.72	1733.56	33.166	1842.06	1624.46	217.598	1687.41	1566.75	120.657	1443.08	1306.45	136.631	1612.53	1588.23	24.294	1189.87	1186.07
1702.1	1556.28	145.816	1448.84	1345.45	103.391	1398.48	1334.68	63.807	1593.75	1570.16	23.584	1630.06	1567.12	62.939	1647.32	1581.81	65.512	1467.31	1478.6	-11.291	1735.05	1666.06	68.994	1757.3	1650.43	106.875	1741.64	1666.14	75.499	1585.46	1475.31	110.151	1754.31	1724.2	30.107	1810.94	1621.54	189.399	1680.77	1564.41	116.36	1443.36	1298.48	144.882	1605.14	1578.35	26.792	1182.53	1179.05
1653.8	1559.28	94.523	1444.13	1344.47	99.664	1399.71	1343	56.708	1595.47	1571.08	24.392	1633.79	1562.51	71.285	1656.94	1587.17	69.779	1482.48	1484.02	-1.547	1745.87	1670.16	75.707	1744.35	1648.81	95.536	1717.13	1661.87	55.257	1581.62	1471.94	109.686	1737.47	1722.09	15.379	1797.02	1622.45	174.57	1675.17	1560.85	114.312	1450.33	1304.18	146.147	1613.33	1582.3	31.026	1172.65	1184.5
1717.99	1552.4	165.589	1444.64	1341.02	103.615	1394.15	1343.84	50.31	1582.04	1564.59	17.449	1620	1562.61	57.385	1658.57	1581.52	77.052	1478.86	1477.29	1.57	1782.79	1668.19	114.599	1735.05	1644.12	90.927	1716.43	1668.06	48.37	1574.84	1473.19	101.642	1750.26	1726.69	23.568	1780.88	1621.8	159.078	1674.78	1558.7	116.079	1439.17	1297.7	141.467	1622.54	1576.69	45.85	1171.19	1178.78
1862.2	1552.64	309.562	1450.78	1347.41	103.367	1400.18	1361.51	38.672	1578.75	1572.15	6.602	1612.09	1559.2	52.887	1699.76	1582.55	117.216	1489.66	1478.15	11.502	1780.28	1661.24	119.035	1721.74	1647.58	74.164	1714.32	1658.26	56.06	1546.71	1469.24	77.469	1734.9	1721.13	13.773	1778.73	1616.05	162.679	1658.84	1556.33	102.512	1431.29	1299.42	131.863	1624.34	1576.16	48.178	1173.36	1179.16
1871.87	1555.19	316.686	1448.28	1349.32	98.957	1397.08	1364.64	32.436	1577.06	1562.35	14.707	1604.99	1562.98	42.011	1722.53	1581.74	140.789	1497.92	1478.43	19.491	1789.18	1663.49	125.687	1719.65	1649.5	70.143	1737.92	1664.25	73.665	1581.75	1473.64	108.107	1755.42	1725.95	29.47	1775.78	1623.84	151.936	1665.1	1557.9	107.195	1411	1293.82	117.185	1621.31	1575.96	45.347	1177.41	1180.34
1863.12	1554.51	308.608	1456.39	1344.36	112.03	1391.36	1377.03	14.321	1578.52	1567.12	11.405	1611.32	1555.89	55.423	1734.85	1579.89	154.961	1507.86	1478.99	28.862	1795.54	1663.52	132.015	1697.76	1649.86	47.9	1721.04	1662.29	58.743	1555.04	1472.14	82.9	1744.19	1719.82	24.374	1759.45	1617.6	141.849	1642.65	1550.34	92.307	1413.71	1295.99	117.718	1627.87	1575.26	52.603	1187.53	1180.16
1921.07	1555.63	365.43	1466.66	1342.95	123.709	1381.56	1370.35	11.217	1575.94	1562.51	13.432	1601.82	1555.01	46.807	1735.59	1583.14	152.451	1506.73	1475.14	31.593	1801.23	1659.67	141.563	1695.6	1644.57	51.029	1736.78	1662.05	74.733	1561.71	1471.48	90.223	1736.01	1715.8	20.212	1749.43	1615.21	134.22	1646.58	1551.88	94.704	1396.85	1294.48	102.372	1618.66	1573.09	45.572	1168.91	1173.97
1895.62	1558.37	337.25	1471.72	1342.34	129.387	1382.98	1375.92	7.058	1572.88	1562.61	10.271	1603.14	1545.75	57.389	1744.39	1581.64	162.752	1494.42	1471.81	22.614	1794.1	1653.99	140.109	1694.99	1640.19	54.803	1722.2	1656.69	65.507	1563.12	1467.94	95.174	1727.08	1714.07	13.013	1732.72	1609.7	123.019	1633.77	1548.33	85.436	1396.17	1293.18	102.993	1614.72	1576.59	38.133	1186.96	1178.24
1779.27	1558.94	220.33	1470.1	1340.21	129.892	1374	1377.08	-3.077	1580.15	1559.2	20.953	1594.68	1556.15	38.523	1745.13	1580.56	164.574	1499.87	1470.55	29.319	1759.41	1659.02	100.394	1687.16	1645.09	42.072	1716.86	1657.24	59.621	1549.19	1472.18	77.007	1723.71	1713.75	9.96	1740.98	1608.61	132.366	1632.32	1549.84	82.481	1376.18	1293.87	82.313	1614.09	1571.13	42.962	1167.31	1175.2
1712.1	1561.43	150.672	1481.78	1339.88	141.902	1375.7	1388.65	-12.955	1588.8	1562.98	25.822	1593.39	1546.31	47.081	1747.4	1585.56	161.836	1509.11	1478.24	30.872	1756.89	1658.34	98.549	1679.6	1637.58	42.025	1708.63	1656.06	52.573	1539.21	1468.58	70.635	1735.86	1713.5	22.356	1730.7	1610.12	120.581	1635.44	1550.53	84.911	1386.59	1293.65	92.94	1613.12	1574.03	39.092	1181.74	1176.2
1634.31	1559.58	74.734	1486.74	1334.72	152.022	1381.76	1388.2	-6.439	1586.54	1555.89	30.645	1586.73	1552.7	34.029	1752.25	1581.08	171.163	1490.81	1470.85	19.96	1805.13	1656.33	148.797	1685.19	1638.22	46.978	1733.4	1655.52	77.882	1549.79	1469.52	80.271	1725.58	1721.38	4.2	1715.21	1613.73	101.482	1663.37	1551.09	112.277	1392.99	1292.84	100.145	1611.34	1569.8	41.533	1172.36	1173
1598.34	1567.94	30.394	1481.09	1340.82	140.27	1378.21	1390.55	-12.338	1594.73	1555.01	39.723	1594.16	1555.1	39.056	1754.01	1581.98	172.034	1504.91	1474.6	30.315	1816.19	1647.69	168.501	1675.2	1633.12	42.087	1737.72	1646.28	91.445	1543.94	1463.86	80.077	1736.28	1708.99	27.296	1694.7	1605.28	89.42	1636.88	1543.28	93.603	1403.95	1290.89	113.062	1613.22	1572.92	40.296	1172.33	1177.59
1981.24	1565.2	416.042	1489.97	1333.97	155.996	1365.05	1378.44	-13.396	1593.41	1545.75	47.661	1587.88	1556.88	30.998	1739.07	1576.31	162.769	1501.31	1464.32	36.988	1787.9	1651.61	136.29	1676.47	1635.71	40.764	1723.07	1652.33	70.739	1542.77	1468.15	74.611	1726.41	1712.81	13.604	1693.73	1603.47	90.254	1631.99	1547.19	84.808	1395.59	1288.34	107.255	1616.43	1567.63	48.796	1181.3	1170.85
1984.14	1573.51	410.633	1495.83	1336.84	158.996	1373.99	1386.74	-12.748	1593.88	1556.15	37.722	1582.26	1550.47	31.788	1765.73	1577.82	187.911	1489.87	1471.87	17.997	1784.15	1651.33	132.824	1677.13	1630.87	46.259	1747.66	1650.98	96.676	1531.18	1459.1	72.084	1731.5	1707.05	24.447	1690.04	1607.65	82.381	1633.98	1549.45	84.527	1379.23	1289.84	89.395	1617.7	1570.54	47.167	1172.49	1172.83
1954.53	1573.71	380.819	1481.55	1333.79	147.756	1366.51	1375.72	-9.215	1589.4	1546.31	43.092	1581.57	1551.11	30.458	1745.48	1574.99	170.481	1473.16	1462.74	10.42	1764.92	1652.96	111.967	1690.53	1630.42	60.117	1720.43	1645.92	74.513	1514.91	1478.73	36.177	1727.79	1707.04	20.753	1689	1605.21	83.788	1659.18	1545.6	113.574	1360.7	1287.2	73.499	1621.88	1565.05	56.829	1171.87	1172.69
1903.22	1576.17	327.05	1489.87	1336.14	153.729	1371.04	1382.76	-11.722	1597.2	1552.7	44.503	1588.55	1541.38	47.171	1760.37	1574.61	185.753	1461.19	1467.53	-6.344	1760.91	1646.35	114.562	1716.01	1624.48	91.523	1716.47	1644.86	71.607	1518.1	1479.33	38.773	1718.5	1706.6	11.901	1673.48	1600.53	72.955	1654.59	1536.86	117.727	1357	1285.9	71.102	1625.27	1565.9	59.363	1173.87	1168.6
1798.57	1578.43	220.146	1489.11	1335.35	153.76	1374.34	1380.94	-6.608	1600.4	1555.1	45.299	1590.89	1542.95	47.941	1748.23	1578.36	169.872	1469.26	1466.94	2.322	1763.96	1649.38	114.573	1728.57	1626.93	101.643	1728.8	1647.24	81.559	1517.5	1490.71	26.789	1720.69	1708.72	11.967	1662.38	1604.03	58.352	1658.2	1541.49	116.705	1360.38	1284.15	76.234	1617.45	1562.88	54.569	1160.96	1169.25
1735.12	1578.92	156.193	1492.27	1335.11	157.161	1374.97	1382.99	-8.019	1608.73	1556.88	51.842	1586.96	1543.34	43.618	1753.79	1579.16	174.634	1468.16	1465.39	2.767	1737.7	1647.42	90.282	1726.45	1622.09	104.359	1710.1	1642.22	67.883	1509.59	1489.1	20.491	1709.34	1707.33	2.011	1672.18	1598.02	74.158	1656.52	1533.33	123.188	1352.49	1289.66	62.83	1623	1563.95	59.043	1177.31	1170.11
1946	1578.68	367.318	1486.23	1334.51	151.721	1367.05	1379.34	-12.295	1602.62	1550.47	52.15	1575.68	1540.4	35.273	1737.22	1569.99	167.226	1453.13	1462.3	-9.174	1736.6	1646.08	90.515	1733.55	1621.81	111.741	1719.69	1641.05	78.644	1521.36	1491.68	29.672	1713.95	1703.53	10.416	1679.95	1603.91	76.035	1686.98	1536.42	150.555	1348.86	1285.69	63.178	1620.94	1560.2	60.738	1167.08	1165.73
1919.52	1574.59	344.93	1478.36	1331.87	146.49	1371.4	1375.3	-3.906	1603.42	1551.11	52.309	1577.5	1544.42	33.083	1731.45	1576.26	155.187	1453.11	1462.28	-9.17	1704.07	1641.97	62.104	1732.31	1615.4	116.909	1716.5	1634.86	81.638	1517.05	1488.11	28.945	1706.47	1696.95	9.514	1641.34	1594.88	46.464	1652.13	1533	119.132	1354.47	1284.74	69.735	1622.91	1565.23	57.676	1171.76	1169.49
1889.87	1566.2	323.669	1472.74	1327.36	145.381	1365.1	1370.69	-5.587	1605.65	1541.38	64.274	1571.56	1540.25	31.303	1718.81	1565.32	153.494	1440.93	1454.71	-13.78	1728.76	1644.64	84.118	1744.53	1621.64	122.889	1712.62	1634.02	78.596	1509.61	1485.34	24.271	1711.05	1700.92	10.131	1655.8	1595.08	60.716	1679.81	1536.68	143.133	1352.83	1284.28	68.549	1617.34	1558.34	59.005	1166.62	1167.37
1803.68	1569.5	234.18	1433.18	1327.63	105.559	1351.61	1371.51	-19.892	1602.7	1542.95	59.749	1576.36	1535.03	41.325	1718.98	1571.44	147.546	1442.48	1457.02	-14.545	1716.15	1642.85	73.306	1735.45	1621.28	114.174	1711.7	1638.74	72.956	1505.84	1481.75	24.092	1700.24	1704.18	-3.939	1648.3	1595.3	53.007	1678.66	1534.18	144.484	1355.16	1286.23	68.922	1613.15	1560.37	52.781	1157.31	1165
1803.61	1567.54	236.078	1415.79	1324.16	91.621	1344.49	1367.01	-22.515	1596.64	1543.34	53.299	1570.67	1534.41	36.26	1715.35	1564.81	150.538	1438.44	1456.1	-17.653	1712.65	1643.37	69.283	1722.33	1617.93	104.402	1716.39	1638.43	77.954	1511.44	1485.95	25.495	1723.79	1696.19	27.603	1647.53	1592.84	54.693	1697.73	1531.34	166.392	1353.05	1279.64	73.413	1616.76	1553.92	62.838	1164.4	1162.32
1728.41	1564.16	164.25	1411.47	1324.7	86.774	1344.72	1371.16	-26.439	1591.36	1540.4	50.955	1569.18	1535.85	33.335	1700.33	1566.58	133.746	1437.92	1457.81	-19.888	1698.27	1636.52	61.753	1720.53	1609.3	111.234	1709.84	1629.42	80.424	1515.77	1480.17	35.601	1709.85	1690.89	18.957	1658.75	1586.02	72.725	1700.9	1533.18	167.714	1354.76	1279.39	75.369	1619.01	1557.76	61.248	1160.01	1161.95
1826.1	1564.7	261.404	1408.14	1324.25	83.892	1339.74	1365.19	-25.449	1588.42	1544.42	44.003	1571.76	1528.31	43.457	1682.76	1563.77	118.992	1447.81	1456	-8.192	1703.7	1637.82	65.884	1713.05	1612.9	100.156	1701.69	1629.75	71.947	1513.44	1485.98	27.456	1706.5	1693.11	13.389	1674.48	1591	83.479	1686.47	1532.69	153.784	1345.85	1283.16	62.691	1610.91	1550.54	60.366	1161.58	1158.83
1819.39	1565.47	253.92	1409.06	1323.26	85.796	1337.7	1366.47	-28.766	1591.88	1540.25	51.63	1569.14	1535.78	33.357	1678.01	1563.96	114.053	1454.91	1451.01	3.895	1688.72	1636.89	51.83	1705.8	1606.14	99.666	1705.15	1628.69	76.455	1505.5	1480.73	24.768	1696.13	1692.87	3.257	1664.36	1585.68	78.674	1710.39	1527.28	183.118	1343.05	1274.11	68.945	1606.93	1554.61	52.323	1154.66	1161.69
1797.31	1560.42	236.892	1404.77	1320.02	84.749	1338.4	1364.69	-26.291	1588.95	1535.03	53.921	1569.44	1538.65	30.786	1667.23	1558.32	108.913	1452.4	1451.05	1.346	1684.45	1642.43	42.022	1697.93	1612.59	85.342	1701.81	1636.99	64.813	1515.95	1481.38	34.569	1697.38	1697.7	-0.317	1671.67	1588.23	83.437	1679.82	1532.66	147.159	1354.91	1276.06	78.85	1605.86	1554.24	51.613	1165.39	1162.13
1784.55	1558.67	225.881	1410.02	1323.4	86.627	1337.83	1356.92	-19.091	1581.26	1534.41	46.849	1562.95	1526.8	36.148	1657.81	1562.22	95.596	1443	1454.58	-11.578	1673.78	1631.36	42.421	1695.41	1606.75	88.658	1705.13	1626.39	78.736	1511.7	1474.41	37.287	1698.97	1688.86	10.112	1686.78	1582.19	104.587	1693.28	1527.84	165.442	1345.08	1279.89	65.192	1602.96	1553.21	49.751	1157.78	1161.37
1757.69	1562.84	194.852	1401.09	1325.76	75.326	1337.44	1362.18	-24.739	1566.85	1535.85	31.001	1566.31	1531.63	34.674	1645.4	1560.53	84.869	1446.66	1445.69	0.967	1674.68	1633.28	41.395	1680.22	1604.82	75.405	1710.37	1629.03	81.34	1506.28	1474.49	31.79	1703.8	1689.75	14.041	1690.57	1579.87	110.705	1695.38	1525.62	169.756	1362.49	1274.98	87.507	1615.88	1555.07	60.811	1168.05	1161.78
1717.4	1558.38	159.021	1397.85	1316.97	80.88	1339.73	1360	-20.275	1576.9	1528.31	48.591	1565.62	1531.4	34.223	1644.64	1560.24	84.4	1443.62	1446.15	-2.531	1665.62	1630.21	35.409	1674.74	1600.85	73.888	1685.88	1620.93	64.952	1505.6	1473.54	32.058	1689.62	1680.93	8.691	1675.19	1581.71	93.487	1699.08	1517.46	181.62	1360.71	1274.29	86.43	1601.23	1549.99	51.24	1167.31	1157.44
1674.17	1553.23	120.941	1398.46	1317.32	81.144	1331.8	1356.12	-24.325	1566.97	1535.78	31.188	1559.08	1530.21	28.861	1628.84	1554.08	74.755	1454.61	1445.27	9.337	1670.82	1636.16	34.657	1671.16	1600.6	70.566	1688.73	1618.5	70.232	1505.35	1472.62	32.73	1696.98	1683.07	13.909	1674.84	1578.8	96.037	1675.93	1523.21	152.72	1356.48	1269.61	86.878	1601.12	1546.22	54.9	1166.15	1160.18
1702.4	1555.88	146.514	1409.21	1321.54	87.669	1334.35	1358.98	-24.624	1564.69	1538.65	26.036	1558.02	1530.57	27.443	1635.37	1556.21	79.16	1457.97	1444.08	13.889	1661.39	1627.41	33.973	1665.35	1600.76	64.583	1691.17	1624.47	66.692	1513.75	1469.94	43.808	1691.6	1682.9	8.697	1672.3	1582.43	89.871	1672	1522.12	149.872	1346.47	1275.35	71.129	1581.05	1546.53	34.516	1167.27	1156.44
1671.96	1552.02	119.937	1394.07	1316.51	77.559	1329.11	1352.56	-23.447	1552.55	1526.8	25.743	1554.15	1529.84	24.315	1633.07	1552.33	80.741	1464.46	1449.35	15.113	1670.89	1627.19	43.7	1667.56	1607.07	60.49	1701.87	1626.47	75.402	1518.47	1472.48	45.989	1707.91	1689.97	17.945	1665.98	1583.38	82.594	1666.45	1524.33	142.12	1350.56	1270.1	80.46	1587.21	1544.82	42.393	1171.98	1152.19
1664.12	1555.62	108.498	1406.85	1320.08	86.772	1335.97	1350.66	-14.682	1550.05	1531.63	18.417	1557.66	1530.17	27.498	1634.91	1555.87	79.039	1443.11	1444.93	-1.816	1667.41	1623.83	43.583	1648.76	1598.59	50.168	1686.88	1620.58	66.301	1509.82	1468.49	41.326	1697.61	1681.93	15.675	1665.87	1573.53	92.334	1627.93	1518.76	109.174	1349.51	1272.52	76.983	1587.83	1548.39	39.434	1171.68	1159.57
1676.01	1555.81	120.207	1400.99	1315.78	85.209	1337.82	1352.22	-14.402	1556.21	1531.4	24.808	1548.44	1529.96	18.485	1643.84	1554.92	88.919	1441.94	1445.68	-3.743	1680.44	1628.54	51.898	1641.45	1598.36	43.095	1688.77	1623.64	65.13	1518.02	1470.83	47.184	1701.01	1688.23	12.785	1672.39	1581.75	90.645	1617.83	1514.87	102.959	1346.62	1270.13	76.488	1595.15	1549.99	45.16	1170.98	1157.73
1700.18	1555.82	144.352	1410.73	1318.14	92.593	1339.08	1350.88	-11.798	1547.93	1530.21	17.716	1552	1529.68	22.322	1638.33	1554.28	84.054	1449.07	1440.12	8.948	1675.66	1625.04	50.626	1631	1598.27	32.728	1693	1615.25	77.748	1506.86	1470.15	36.709	1696.54	1678.94	17.593	1661.64	1578.51	83.135	1625.27	1511.11	114.16	1348.94	1271.59	77.349	1587.12	1547.24	39.886	1182.32	1157.19
1701.59	1552.79	148.805	1411.25	1317.55	93.7	1344.1	1350.4	-6.301	1543.66	1530.57	13.091	1551.14	1528.92	22.221	1713.25	1553.76	159.495	1424.26	1441.07	-16.808	1691.34	1627.25	64.088	1622.28	1597.43	24.853	1686.78	1619.6	67.177	1513.29	1474.14	39.153	1703.92	1676.22	27.703	1671.77	1574.15	97.617	1628.54	1520.57	107.979	1351.78	1271.11	80.664	1582.02	1542.93	39.097	1177.33	1151.54
1662.76	1555.67	107.091	1406.82	1323.06	83.768	1343.71	1351.98	-8.269	1539.43	1529.84	9.59	1550.84	1527.71	23.128	1769.12	1551.04	218.077	1425.18	1446.8	-21.62	1704.77	1626.1	78.669	1635.47	1594.18	41.29	1679.45	1619.12	60.335	1499.28	1468.84	30.441	1698.46	1680.69	17.768	1653.06	1573.66	79.406	1652.75	1506.25	146.5	1355.08	1268.06	87.024	1575.26	1542.98	32.28	1179.63	1155.64
1654.66	1552.41	102.258	1419.33	1319.5	99.827	1344.55	1355.04	-10.498	1544.42	1530.17	14.251	1552.41	1523.74	28.669	1800.08	1550.95	249.135	1425.95	1444.37	-18.418	1717.6	1620.74	96.857	1640.02	1596.13	43.897	1699.68	1616.63	83.056	1506.1	1470.72	35.373	1707.19	1675.56	31.624	1656	1580.72	75.282	1637.63	1509.66	127.972	1355.37	1271.07	84.305	1568.28	1544.18	24.098	1179.87	1157.66
1685.03	1555.72	129.303	1414.84	1323.12	91.721	1349.48	1348.3	1.177	1541.18	1529.96	11.218	1549.04	1521.38	27.661	1843.88	1553.01	290.877	1439.99	1441.69	-1.698	1734.52	1621.59	112.932	1644.19	1590.59	53.595	1677.55	1621.44	56.111	1515.79	1467.18	48.603	1706.23	1679.74	26.493	1638.19	1576.02	62.173	1660.53	1512.35	148.177	1356.59	1267.57	89.024	1573.85	1547.95	25.892	1177.44	1156.11
1663	1552	110.999	1429.36	1318.64	110.716	1346.34	1347.63	-1.284	1532.15	1529.68	2.475	1545.65	1522.15	23.506	1834.88	1553.93	280.955	1434.57	1446.12	-11.553	1740.83	1620.8	120.033	1654.04	1594.31	59.735	1682.69	1621.45	61.234	1512.31	1469.76	42.549	1700.44	1681.16	19.277	1647.1	1578.61	68.486	1636.3	1515.38	120.924	1358.52	1269.63	88.897	1568.54	1544.56	23.981	1173.98	1152.16
1678.07	1553.54	124.53	1438.96	1321.23	117.729	1347.45	1347.21	0.241	1536.4	1528.92	7.479	1555.15	1519.43	35.719	1852.93	1553.93	299.007	1428.6	1445.34	-16.746	1746.32	1617.02	129.293	1669.07	1590.26	78.815	1684.32	1613.24	71.081	1519.27	1464.67	54.593	1686.37	1675.34	11.038	1660.02	1574.19	85.821	1620.26	1512.58	107.681	1359.03	1265.4	93.627	1568.82	1541.03	27.784	1161.11	1152.89
1652.91	1553.12	99.79	1440.23	1318.93	121.302	1345.1	1307.83	37.276	1527.29	1527.71	-0.421	1544.93	1520.07	24.857	1860.37	1548.18	312.189	1414.35	1440.8	-26.452	1729.31	1614.63	114.671	1674.07	1587.07	87.001	1685.16	1613.03	72.135	1504.05	1461.87	42.173	1679.47	1671.98	7.492	1632.47	1573.91	58.563	1604.54	1505.43	99.109	1350.61	1265.71	84.904	1567.72	1535.88	31.842	1164.53	1150.29
1578.92	1547.23	31.685	1450.89	1317.43	133.459	1344.35	1301.29	43.056	1527.27	1523.74	3.53	1546.26	1522.06	24.2	1831.15	1548.45	282.699	1438.46	1439.21	-0.752	1730.56	1608.12	122.436	1692.13	1575.57	116.56	1667.79	1604.17	63.612	1504.88	1455.36	49.522	1672.55	1670.26	2.294	1637.4	1569.38	68.023	1590.09	1499.2	90.893	1359.72	1269.09	90.636	1567.91	1540.18	27.725	1162.53	1154.87
1583.11	1544.63	38.477	1458.99	1310.51	148.486	1341.8	1296.14	45.66	1520.48	1521.38	-0.896	1546.48	1520.84	25.636	1864.83	1545.57	319.266	1431.71	1434.48	-2.779	1740.02	1604.76	135.256	1677.68	1587.49	90.19	1668.36	1608.37	59.99	1515.68	1462.37	53.307	1681.19	1668.85	12.346	1614.71	1569.76	44.95	1594.78	1503.96	90.817	1359.28	1271.74	87.538	1576.74	1542.84	33.894	1171.08	1147.93
1559.08	1550.72	8.357	1459.5	1311.69	147.809	1344.34	1297.22	47.12	1524.2	1522.15	2.05	1539.78	1515.84	23.94	1896.29	1545.68	350.611	1430.69	1436.35	-5.656	1723.06	1607.68	115.38	1648.54	1572.03	76.517	1667.45	1608.48	58.978	1514.43	1459.57	54.863	1685.2	1665.44	19.756	1626.94	1567.86	59.089	1583.57	1494.11	89.463	1351.91	1262.97	88.936	1570.33	1537.88	32.453	1159.34	1145.19
1594.48	1544.42	50.057	1461.18	1305.94	155.232	1339.05	1291.72	47.323	1514.24	1519.43	-5.189	1544.56	1518.04	26.522	1875.3	1541.52	333.782	1428.96	1432.26	-3.301	1761.28	1604.44	156.837	1651.61	1573.71	77.891	1665.02	1603.96	61.055	1509.34	1457.38	51.957	1665.3	1663.01	2.281	1619.92	1566.57	53.35	1594.23	1494.59	99.638	1339.68	1261.17	78.519	1579.28	1531.34	47.94	1155.96	1142.91
1715.26	1546.28	168.977	1484.96	1306.55	178.419	1335.85	1291.68	44.169	1517.39	1520.07	-2.686	1537.39	1517.43	19.963	1867.73	1540.57	327.159	1420.42	1432.72	-12.301	1760.89	1606.65	154.238	1639.97	1571.47	68.502	1665.07	1604.15	60.916	1515.48	1456.57	58.902	1659.95	1665.98	-6.033	1615.92	1567.84	48.081	1575.58	1497.46	78.119	1342.37	1258.01	84.352	1595.5	1540.35	55.156	1155.34	1146.72
1743.34	1554.97	188.371	1493.22	1310	183.224	1336.77	1294.21	42.556	1524.1	1522.06	2.043	1538.49	1514.13	24.355	1846.76	1543.22	303.534	1435.52	1441.11	-5.59	1767.43	1609.83	157.607	1642.65	1576.13	66.523	1695.44	1610.29	85.158	1509.8	1458.57	51.237	1666.9	1667.93	-1.034	1635.28	1565.09	70.193	1590.04	1503.58	86.462	1341.91	1258.43	83.475	1590.71	1537.25	53.461	1157.31	1147.46
1708.21	1550.56	157.647	1482.93	1306.25	176.68	1338.11	1291.44	46.676	1515.84	1520.84	-5.008	1530.63	1511.55	19.081	1800.75	1546.16	254.592	1426.79	1431.08	-4.297	1744.9	1604.74	140.161	1650.06	1565.27	84.79	1684.75	1601.18	83.568	1510.65	1462.4	48.257	1660.6	1661.97	-1.369	1612.9	1563.14	49.763	1568.34	1496.63	71.708	1337.65	1262.57	75.075	1607.6	1540.93	66.668	1162.05	1146.1
1728.87	1545.71	183.154	1496.32	1302.82	193.492	1335	1289.65	45.352	1507.23	1515.84	-8.607	1538.5	1516.75	21.751	1767.73	1542.07	225.664	1434.79	1432.53	2.26	1721.63	1605.57	116.064	1652.43	1569.52	82.91	1693.73	1604.64	89.092	1510.94	1457.96	52.981	1656.91	1665.72	-8.811	1607.99	1567.49	40.494	1586.49	1499.04	87.454	1339.84	1258.26	81.588	1587.28	1531.35	55.935	1142.81	1144.33
1699.16	1553.55	145.606	1483.3	1301.99	181.312	1339.14	1295.59	43.556	1519.19	1518.04	1.15	1537.45	1512.78	24.672	1744.42	1545.72	198.694	1429.35	1434.86	-5.509	1713.67	1602.71	110.962	1661.15	1559.68	101.479	1690.99	1598.41	92.587	1499.73	1450.87	48.854	1659.37	1655.06	4.318	1593.74	1559.35	34.393	1578.21	1487.91	90.307	1341.89	1261.73	80.153	1604.17	1535.53	68.639	1141.54	1146.1
1657.69	1553.39	104.304	1483.67	1300.27	183.395	1336.61	1293.56	43.05	1514.23	1517.43	-3.203	1536.63	1508.66	27.969	1689.43	1543.7	145.737	1439.13	1429.12	10.008	1707.19	1607.86	99.33	1667.6	1566.75	100.85	1714.95	1603.89	111.06	1501	1452.98	48.018	1660.08	1661.04	-0.956	1609.18	1567.25	41.923	1572.89	1493.05	79.838	1348.78	1253.22	95.564	1602.66	1539.32	63.349	1136.28	1144.77
1653.35	1547.04	106.31	1470.86	1300.32	170.546	1338.24	1292.3	45.94	1507.69	1514.13	-6.444	1528.78	1507.7	21.077	1838.98	1533.84	305.147	1422.41	1429.24	-6.833	1688.06	1602.55	85.514	1661.9	1560.19	101.712	1700.12	1591	109.12	1508.2	1449.86	58.345	1651.65	1659.45	-7.809	1597.12	1560.26	36.858	1568.44	1491.62	76.83	1334.98	1257.9	77.079	1599.17	1533.42	65.754	1151.57	1143.86
1784.33	1543.58	240.753	1470.25	1293.85	176.403	1342.4	1288.18	54.218	1504.03	1511.55	-7.518	1537.88	1513.64	24.238	1844.76	1535.19	309.577	1433.24	1434.25	-1.017	1699.89	1607.09	92.802	1679.71	1560.02	119.69	1689.88	1591.8	98.075	1498.96	1450.48	48.488	1653.48	1657.55	-4.072	1595.41	1557.62	37.79	1575.88	1485.53	90.347	1343.46	1253.52	89.942	1603.51	1533.42	70.088	1153.15	1140.74
1798.68	1545.39	253.29	1467.85	1300.34	167.503	1347.05	1284.14	62.907	1508.64	1516.75	-8.102	1531.86	1504.72	27.139	1828.63	1535.37	293.258	1419.9	1433.23	-13.328	1689.52	1602.75	86.771	1697.32	1550.05	147.269	1697.13	1591.69	105.438	1493.95	1449.99	43.962	1647.32	1653.15	-5.837	1595.45	1556.35	39.1	1567.18	1486.16	81.023	1340.72	1251.17	89.549	1592.88	1531.23	61.65	1139.01	1139.21
1769.97	1541.4	228.575	1460.64	1293.94	166.7	1348.25	1280.95	67.295	1503.71	1512.78	-9.069	1530.94	1506.62	24.316	1794.59	1533.03	261.559	1423.53	1434.09	-10.568	1681.27	1608.57	72.698	1691.94	1559.62	132.318	1685.61	1594.3	91.31	1492.67	1451.27	41.399	1650.35	1655.52	-5.165	1582.38	1561.6	20.777	1574.51	1490.81	83.701	1348.8	1252.84	95.96	1601.72	1528.69	73.025	1138.21	1141.57
1700.88	1539.37	161.507	1449.8	1294.81	154.987	1339.3	1275.86	63.441	1511.33	1508.66	2.672	1529.64	1503.1	26.541	1788.84	1530.02	258.826	1430.44	1427.27	3.17	1673.34	1604.35	68.991	1672.63	1547.48	125.149	1691.15	1588.06	103.096	1485.3	1444.95	40.35	1645.48	1648.99	-3.508	1569.1	1547.43	21.672	1555.27	1478.98	76.291	1339.25	1252.48	86.778	1595.66	1530.8	64.856	1127.89	1139.22
1712.38	1540.19	172.189	1442.82	1289.21	153.61	1334.44	1278.23	56.218	1505.39	1507.7	-2.31	1530.19	1507.38	22.806	1767.88	1531.1	236.784	1429.34	1429.72	-0.377	1672.85	1613.08	59.765	1689.35	1552.75	136.594	1702.33	1594.09	108.237	1490.06	1455.1	34.962	1645.03	1656.7	-11.667	1573.28	1557.84	15.439	1551.44	1488.79	62.653	1342.13	1249.79	92.336	1596.15	1531.45	64.699	1128.18	1138.74
1733.12	1538.93	194.188	1430.94	1286.18	144.767	1346.8	1276.43	70.37	1509.63	1513.64	-4.011	1524.43	1497.2	27.232	1754.02	1532.68	221.34	1422.19	1426.99	-4.803	1662.57	1608.52	54.056	1673.62	1551.42	122.206	1688.32	1582.16	106.164	1476.36	1440.56	35.798	1652.89	1642.86	10.035	1563.18	1551.1	12.078	1544.75	1480.75	63.998	1340.14	1252.3	87.839	1592.63	1529.08	63.547	1138.54	1140.63
1725.56	1531.75	193.807	1410	1282.65	127.347	1343.1	1279.47	63.628	1504.18	1504.72	-0.537	1527.51	1500.2	27.311	1724.54	1528.41	196.129	1413.55	1421.97	-8.426	1670.27	1607.58	62.685	1679.87	1547.69	132.178	1692.74	1589.35	103.392	1492.69	1453.37	39.321	1645.99	1648.8	-2.815	1571.82	1554.65	17.176	1565.3	1485.2	80.094	1329.82	1248.36	81.466	1572.34	1524.31	48.033	1131.6	1140.3
1699.94	1532.51	167.429	1408.91	1283.15	125.765	1346.52	1279.22	67.296	1507	1506.62	0.38	1536.49	1496.33	40.163	1699.09	1527.38	171.713	1426.42	1419.27	7.148	1635.35	1606.05	29.303	1670.74	1552.54	118.201	1682.7	1580.28	102.421	1481.85	1445.38	36.47	1638.83	1646.28	-7.456	1575.73	1548.2	27.537	1564.76	1476.96	87.8	1337.91	1246.38	91.532	1582.48	1522.88	59.602	1134.05	1141.77
1635.68	1530.01	105.664	1401.13	1276.04	125.089	1342.73	1277.78	64.953	1503.36	1503.1	0.26	1533.92	1497.89	36.033	1688.25	1527.65	160.606	1410.88	1422.19	-11.305	1616.88	1611.79	5.09	1661.62	1553.14	108.477	1682.29	1586.97	95.324	1492.04	1448.75	43.289	1642.32	1653.15	-10.834	1564.85	1553.61	11.243	1560.72	1482.96	77.76	1336.03	1248.49	87.543	1574.23	1520.94	53.283	1125.02	1139.43
1676.95	1534.15	142.805	1393.89	1277.88	116.011	1351.71	1279.12	72.584	1507.88	1507.38	0.499	1533.82	1496.91	36.91	1696.04	1526.97	169.062	1403.93	1426.94	-23.002	1600.45	1610.78	-10.332	1665.48	1544.24	121.249	1676.56	1582.34	94.215	1474.43	1451.22	23.21	1645.17	1643.55	1.616	1570.13	1547.61	22.524	1565.53	1477.97	87.561	1333.34	1245.33	88.015	1575.81	1529.17	46.644	1128.86	1138.01
1688.84	1520.01	168.829	1380.34	1265.82	114.516	1340.7	1272.21	68.487	1498.48	1497.2	1.281	1529.79	1496.46	33.329	1675.78	1520.3	155.475	1404.12	1414.22	-10.102	1602.56	1611.82	-9.26	1698.03	1550.43	147.599	1698.88	1579.41	119.461	1478.12	1441.3	36.827	1656.29	1646.89	9.395	1562.57	1547.75	14.827	1580.48	1477.8	102.678	1329.96	1246.52	83.437	1558.27	1517.48	40.787	1117.08	1140.59
1682.83	1524.92	157.913	1378.61	1269.62	108.99	1343.34	1273.96	69.371	1506.37	1500.2	6.167	1529.85	1495.69	34.156	1651.61	1520.23	131.375	1401.24	1421.27	-20.032	1624.37	1611.47	12.895	1698.83	1542.64	156.189	1667.33	1578.23	89.1	1474.94	1446.2	28.739	1641.82	1639.26	2.56	1552.74	1542.88	9.864	1595.3	1473.78	121.526	1328.75	1245.07	83.677	1565.66	1519.57	46.092	1128.36	1141.4
1663.54	1520.91	142.627	1362.73	1258.44	104.294	1335.82	1268.98	66.841	1494.9	1496.33	-1.431	1527.45	1492.7	34.751	1629.46	1519.43	110.033	1404.17	1410.91	-6.741	1639.11	1607.83	31.28	1680.52	1542.8	137.725	1660.91	1579.2	81.701	1475.94	1443.47	32.469	1651.56	1634.51	17.056	1553.59	1542.81	10.783	1593.16	1472.1	121.067	1330.94	1242.27	88.673	1565.44	1516.98	48.46	1115.38	1138.16
1654.63	1523.56	131.071	1360.98	1259.31	101.676	1336.21	1271.4	64.813	1499.95	1497.89	2.061	1531.84	1491.1	40.734	1637.47	1523.18	114.288	1395.43	1414.73	-19.3	1631.39	1601.27	30.127	1666.23	1533.73	132.505	1662.57	1573.06	89.513	1466.66	1437.24	29.419	1659.64	1630.05	29.589	1547.78	1540.03	7.755	1600.65	1467.93	132.712	1334.6	1242.55	92.049	1574.35	1514.48	59.874	1119.07	1139.17
1619.84	1519.96	99.881	1352.93	1255.81	97.112	1334.39	1270.28	64.107	1498.44	1496.91	1.528	1520.54	1489.68	30.857	1654.08	1516.64	137.434	1391.95	1414.13	-22.183	1630.59	1603.88	26.709	1643.08	1542.19	100.886	1669.97	1578.91	91.059	1467.41	1450.48	16.926	1644.72	1638.47	6.247	1562.84	1541.13	21.702	1595.21	1469.92	125.29	1313.36	1240.26	73.099	1566.34	1510.04	56.3	1118.16	1136.55
1622.31	1517.37	104.943	1360.88	1252.56	108.325	1332.82	1268.86	63.968	1489.32	1496.46	-7.143	1523.97	1493.62	30.347	1637.51	1518.44	119.067	1400.35	1411.17	-10.823	1624.74	1600.28	24.458	1650.88	1545.55	105.338	1657.24	1568.76	88.472	1472.27	1448.87	23.398	1644.27	1631.73	12.542	1565.05	1541.17	23.885	1600.83	1463.46	137.372	1310.94	1240.21	70.731	1562.95	1511.48	51.468	1118.82	1137.14
1630.09	1517.82	112.269	1352.51	1251.96	100.554	1338.67	1268.94	69.736	1498.53	1495.69	2.841	1519.95	1492.38	27.578	1626.84	1516.48	110.356	1411.8	1413.15	-1.357	1624.33	1598.91	25.425	1655.35	1539.54	115.804	1667.03	1570.22	96.813	1475.36	1446.38	28.983	1649	1632.23	16.768	1555.95	1537.12	18.832	1640.75	1463.38	177.369	1305.43	1239.69	65.731	1560.84	1513.62	47.219	1115.41	1133.89
1628.51	1519.62	108.895	1351.52	1250.61	100.909	1331.45	1267.46	63.988	1486.18	1492.7	-6.523	1522.23	1490.9	31.331	1625.52	1518.05	107.476	1410.25	1414.11	-3.864	1624.46	1593.39	31.067	1658.31	1540.74	117.574	1654.3	1573.88	80.417	1470.24	1447.17	23.073	1643.69	1634.81	8.883	1567.39	1532.11	35.277	1646.87	1460.63	186.242	1315.42	1243.79	71.634	1557.71	1511.57	46.135	1123.69	1140.6
1633.97	1514.68	119.283	1348.34	1253.59	94.749	1334.66	1270.44	64.215	1486.62	1491.1	-4.481	1522.4	1490.36	32.048	1619.11	1511.96	107.157	1403.31	1410.9	-7.592	1613.21	1596.18	17.029	1655.28	1541.68	113.593	1653.6	1570.33	83.263	1472.45	1450.19	22.262	1653.5	1635.44	18.058	1568.68	1538.75	29.935	1644.22	1461.69	182.536	1303.73	1241.33	62.405	1528.11	1512.92	15.195	1126.73	1132.48
1627.99	1518.01	109.981	1346.48	1253.73	92.756	1331.86	1270.39	61.468	1494.83	1489.68	5.147	1512.54	1488.49	24.05	1612.1	1516.2	95.901	1393.7	1412.96	-19.26	1600.16	1595.57	4.591	1656.16	1537.77	118.393	1649.43	1571.53	77.907	1467.01	1446.2	20.807	1636.92	1628.43	8.489	1564.89	1528.62	36.278	1644.99	1453.13	191.857	1301.31	1246.25	55.053	1526.5	1512.38	14.121	1128.96	1141.8
1602.39	1515.02	87.374	1336.38	1251.41	84.968	1330.3	1265.64	64.653	1484.8	1493.62	-8.824	1513.96	1489.86	24.095	1603.22	1513.65	89.573	1390.46	1414.59	-24.128	1592.9	1595.39	-2.496	1654.76	1537.5	117.253	1645.81	1573.67	72.135	1471.96	1448.24	23.718	1648.11	1634.94	13.164	1566.16	1533.71	32.448	1663.1	1452.82	210.278	1298.83	1241.87	56.96	1516.4	1509.87	6.537	1122.17	1138.18
1590.65	1516.47	74.176	1335.32	1248.68	86.634	1331.05	1270.07	60.983	1491.15	1492.38	-1.222	1515.2	1489.29	25.906	1594.85	1518.87	75.976	1398.58	1418	-19.416	1584.96	1590.04	-5.083	1655.23	1537.82	117.407	1638.66	1565.63	73.033	1469.3	1448.72	20.577	1628.88	1629.74	-0.857	1566.07	1538.5	27.576	1638.42	1451.97	186.448	1312.87	1247.31	65.563	1516.75	1507.35	9.394	1125.89	1135.96
1645.25	1516.42	128.826	1339.23	1247.4	91.829	1323.86	1266.65	57.214	1486.03	1490.9	-4.866	1517.42	1489.06	28.364	1595.1	1516.19	78.91	1395.01	1420.44	-25.425	1642.18	1586.93	55.245	1667.51	1537.34	130.169	1631.53	1571.36	60.166	1481.91	1449.77	32.142	1636.39	1634.21	2.183	1569.76	1535.72	34.035	1620.8	1456.83	163.964	1313.57	1247.59	65.98	1515.93	1504.07	11.863	1115.63	1137.09
1633.4	1517.26	116.143	1332.42	1249	83.424	1324.63	1270.31	54.317	1496.97	1490.36	6.612	1518.39	1488.43	29.964	1586.61	1519.28	67.328	1406.8	1422.88	-16.082	1649.48	1586.7	62.783	1663.37	1531.48	131.889	1626.48	1568.64	57.839	1476.64	1446.94	29.707	1629.98	1632.95	-2.97	1582.2	1529.37	52.833	1605.34	1449.93	155.406	1319.11	1247.87	71.235	1544.27	1510.99	33.282	1127.95	1139.17
1613.7	1520.11	93.59	1341.98	1248.37	93.615	1325.15	1267.57	57.576	1485.58	1488.49	-2.913	1514.54	1487.75	26.79	1585.71	1517.54	68.172	1415.64	1429.59	-13.946	1653.96	1590.01	63.952	1679.48	1541.55	137.927	1632.32	1570.44	61.88	1485.46	1457.71	27.747	1639.96	1632.87	7.084	1590.55	1535.49	55.067	1592.62	1454.08	138.542	1304.92	1249.1	55.82	1520.58	1512.63	7.945	1124.82	1138.39
1570.61	1515.77	54.839	1352.73	1251.89	100.844	1330.02	1270.73	59.289	1483.66	1489.86	-6.202	1517.32	1489.31	28.012	1580.6	1517.78	62.815	1406.26	1424.46	-18.201	1656.91	1583.65	73.26	1684.5	1533.82	150.677	1641.81	1565.57	76.246	1481.71	1451.05	30.657	1647.2	1627.8	19.402	1592.18	1527.39	64.794	1640.31	1447.5	192.809	1315.71	1251.08	64.632	1499.53	1507.21	-7.681	1115	1137.96
1624.73	1519.31	105.415	1362.9	1244.64	118.256	1322.89	1266.26	56.627	1492.18	1489.29	2.892	1517.93	1484.84	33.091	1576.58	1515.85	60.73	1415.71	1427.51	-11.801	1662.29	1587.03	75.259	1694.46	1535.07	159.392	1636.48	1570.53	65.946	1485.46	1455.34	30.116	1641.98	1629.99	11.984	1593.79	1532.52	61.273	1638.92	1453.81	185.108	1313.81	1244.5	69.309	1497.14	1504.82	-7.683	1115	1135.6
1696.81	1518.56	178.245	1371.29	1244.07	127.223	1324.97	1266.17	58.8	1497.45	1489.06	8.394	1516.08	1482.58	33.506	1575.76	1515.8	59.967	1421.4	1430.69	-9.292	1657.77	1584.11	73.657	1687.48	1529.78	157.709	1633.84	1563.21	70.629	1480.83	1451.8	29.032	1636.74	1620.43	16.309	1594.3	1524.82	69.484	1617.8	1443.57	174.229	1318.98	1252.7	66.277	1495.14	1507.08	-11.937	1118.97	1138.43
1715.1	1516.3	198.801	1367.12	1248.38	118.739	1326.17	1262.51	63.659	1486.38	1488.43	-2.045	1509.77	1484.39	25.386	1571.35	1514.41	56.947	1415.54	1437.28	-21.741	1673.31	1581.74	91.569	1679.41	1527.25	152.164	1643.65	1563.13	80.521	1478.93	1446.97	31.958	1649.51	1622.76	26.75	1590.93	1523.35	67.584	1628.76	1445.34	183.419	1322.42	1248.47	73.951	1506.64	1501.4	5.246	1106.37	1133.35
1729.6	1512.79	216.813	1381.06	1244.6	136.451	1331.22	1264.66	66.566	1495.44	1487.75	7.698	1513.59	1484.51	29.074	1565.42	1515.25	50.171	1418.45	1430.76	-12.306	1706.42	1580.07	126.357	1676.53	1524.66	151.872	1631.35	1562.32	69.032	1479.41	1451.7	27.703	1641.12	1622.99	18.124	1584.22	1521.51	62.713	1623.57	1442.5	181.066	1324.1	1252.4	71.697	1508.87	1510.48	-1.61	1109.52	1138.04
1739.98	1515.67	224.306	1386.61	1246.64	139.969	1332.84	1270.26	62.574	1487.57	1489.31	-1.731	1505.97	1482.95	23.022	1570.68	1515.03	55.65	1426.09	1433.56	-7.476	1729.86	1583.29	146.563	1685.35	1530.69	154.658	1640.83	1564.26	76.572	1486.82	1457.9	28.918	1631.31	1624.67	6.638	1572.68	1528	44.68	1614.67	1451.49	163.175	1319.31	1250.96	68.347	1491.76	1506.55	-14.794	1112.77	1131.66
1752.18	1512.48	239.705	1395.69	1243.82	151.872	1331.34	1260.59	70.75	1485.87	1484.84	1.031	1503.59	1483.51	20.082	1565.04	1510.41	54.624	1420.09	1431.82	-11.73	1745.5	1574.32	171.176	1668.75	1521.27	147.486	1639.18	1561.13	78.05	1476.49	1456.94	19.552	1623.39	1624.54	-1.146	1562.8	1519.56	43.241	1592.29	1443.22	149.074	1310.21	1252.98	57.225	1490.44	1501.6	-11.166	1117.61	1135.33
1748.09	1511.44	236.651	1395.52	1247.49	148.022	1324.38	1260.56	63.827	1488.44	1482.58	5.862	1503.01	1486.38	16.624	1566.26	1512.99	53.277	1416.8	1432.6	-15.795	1736.7	1577.57	159.129	1671.37	1523.42	147.952	1644.18	1560.5	83.678	1484.61	1463.89	20.716	1631.47	1627.48	3.983	1571.05	1523.95	47.098	1590.48	1446.38	144.104	1312.02	1258.44	53.582	1497.81	1505.47	-7.66	1113.53	1136.36
1750.54	1515.73	234.804	1404.7	1245.53	159.173	1331.92	1262.32	69.607	1489.9	1484.39	5.513	1511.57	1480.91	30.658	1559.25	1511.59	47.665	1445.39	1429	16.392	1728.05	1574.8	153.256	1651.87	1523.79	128.084	1642.93	1560.04	82.885	1486.54	1472.19	14.351	1633.84	1620.64	13.198	1570.9	1518.34	52.561	1590.99	1450.28	140.715	1334.6	1257.06	77.539	1496.79	1499.42	-2.625	1109.61	1133.26
1751.38	1513.75	237.629	1396.47	1243.92	152.549	1328.46	1255.47	72.996	1474.22	1484.51	-10.295	1507.42	1479.97	27.443	1555.96	1510.6	45.362	1440.62	1418.64	21.983	1748.49	1576.05	172.437	1643.73	1526.38	117.346	1652.22	1562.81	89.414	1486.62	1475.95	10.668	1655.47	1621.91	33.563	1565.14	1521.3	43.837	1594.42	1453.61	140.81	1332.22	1260.53	71.688	1501.53	1493.46	8.074	1110.04	1129.76
1727.82	1517.55	210.27	1409.76	1247.08	162.677	1329.51	1258.79	70.724	1485.9	1482.95	2.951	1509.89	1480.31	29.589	1554.36	1513.53	40.83	1437.04	1426.54	10.509	1737.22	1579.02	158.198	1630.31	1519.77	110.539	1655.21	1561.44	93.769	1487.3	1474.07	13.229	1641.02	1616.97	24.047	1574.08	1518.37	55.717	1583.28	1446.94	136.336	1333.63	1263.88	69.752	1503.98	1496.32	7.667	1116.36	1134.88
1698.87	1516.78	182.09	1404.01	1237.2	166.81	1323.95	1254.44	69.512	1488.48	1483.51	4.97	1514.62	1481.73	32.895	1557.52	1508.85	48.667	1427.98	1419.28	8.702	1738.35	1577.27	161.083	1626.97	1521.35	105.618	1661.58	1561.75	99.833	1483.24	1477.41	5.83	1638.23	1624.8	13.428	1567.51	1527.66	39.856	1568.03	1451.11	116.919	1331.48	1266.35	65.128	1507.52	1498.2	9.317	1116.79	1138.39
1631.97	1515.13	116.838	1418.97	1243.05	175.922	1329.43	1253.41	76.011	1495.05	1486.38	8.667	1509.01	1478.56	30.451	1555.65	1513.14	42.502	1437.58	1420.94	16.639	1745.22	1574.68	170.534	1633.45	1520.47	112.974	1659.41	1560.39	99.018	1490.27	1471.35	18.923	1644.31	1617.26	27.052	1560.55	1521.67	38.873	1546.65	1449.44	97.206	1327.94	1270.1	57.834	1506.06	1491.89	14.162	1108.42	1133.14
1651.86	1516.71	135.147	1405.3	1241.65	163.657	1324.79	1246.23	78.565	1491.87	1480.91	10.957	1507.08	1480.76	26.322	1553.05	1509.44	43.607	1438.73	1420.68	18.049	1719.9	1575.12	144.789	1605.01	1523.78	81.228	1657.92	1559.89	98.029	1484.14	1470.58	13.558	1639.35	1616.83	22.524	1551.96	1517.66	34.302	1553.47	1449.45	104.024	1324.67	1270.39	54.28	1495.94	1488.3	7.637	1114.67	1133.35
1658.57	1513.34	145.232	1412.48	1236.93	175.558	1321.97	1250.79	71.183	1474.13	1479.97	-5.84	1513.1	1475.64	37.459	1545.44	1510.06	35.382	1428.69	1416.7	11.989	1645.15	1570.7	74.445	1600.92	1518.12	82.796	1639.32	1552.61	86.714	1485.52	1468.28	17.238	1640.79	1611.67	29.126	1551.69	1517.69	33.998	1542.71	1446.46	96.243	1322.16	1274.32	47.839	1483.64	1490.13	-6.493	1129.1	1133.23
1670.71	1513.72	156.996	1398.42	1240.28	158.143	1318.68	1243.96	74.713	1495.03	1480.31	14.725	1507.55	1479.51	28.047	1543.53	1507.62	35.906	1424.38	1417.16	7.226	1644.79	1576.27	68.526	1595.21	1525.33	69.882	1633.09	1557.8	75.282	1484.67	1471.19	13.472	1643.36	1614.47	28.898	1551.15	1516.31	34.838	1540.31	1454.45	85.857	1323.25	1273.81	49.443	1474.29	1483.88	-9.587	1120.74	1130.63
1646.83	1510.42	136.404	1410.59	1238.07	172.518	1315.11	1243.05	72.056	1487.31	1481.73	5.58	1508.89	1473.83	35.057	1539.67	1504.87	34.802	1419.5	1412.72	6.778	1649.25	1568.42	80.83	1583.6	1522.81	60.788	1673.75	1553.53	120.214	1477.35	1464.2	13.142	1649.84	1612.34	37.497	1539.53	1510.1	29.436	1544.48	1453.76	90.717	1344.38	1269.75	74.623	1499.75	1485.2	14.549	1125.21	1129.56
1627.6	1513.03	114.577	1395.85	1237.16	158.693	1312.92	1240.25	72.674	1484.9	1478.56	6.342	1500.29	1475.18	25.105	1532.84	1505.91	26.929	1409.45	1406.73	2.719	1642.28	1570.63	71.642	1577.45	1519.51	57.947	1675.42	1555.44	119.975	1478.14	1467.19	10.953	1658.42	1620.08	38.348	1539.21	1509.89	29.326	1556.61	1447.86	108.751	1343.46	1271.09	72.37	1489.57	1479.17	10.397	1120.18	1127.99
1568.61	1521.56	47.051	1392.84	1246.03	146.808	1313.77	1242.39	71.383	1487.76	1480.76	7.005	1510.48	1472.58	37.901	1565.06	1507.82	57.239	1410.88	1411.39	-0.51	1629.99	1569.48	60.507	1566.24	1519.54	46.697	1666.9	1546.42	120.475	1479.29	1463.41	15.878	1652.25	1614.79	37.464	1535.8	1506.23	29.568	1544.08	1442.98	101.098	1351.59	1271.86	79.725	1509.73	1477.18	32.548	1127.15	1132.23
1595.92	1515.82	80.104	1391.92	1237.32	154.599	1308.75	1234.51	74.236	1484.48	1475.64	8.838	1512.88	1476.42	36.458	1552.14	1512.21	39.932	1406.37	1412.31	-5.938	1615.65	1569.91	45.739	1565.79	1521.62	44.171	1680.85	1549.23	131.623	1482.71	1464.35	18.356	1662.23	1610.65	51.578	1532.81	1510.16	22.648	1535.54	1445.87	89.674	1351	1272.01	78.985	1495.4	1479.99	15.406	1130.48	1130.44
1635.41	1516.38	119.027	1391.84	1239.02	152.818	1302.54	1236.91	65.629	1484.71	1479.51	5.2	1507.76	1474.6	33.159	1553.85	1505.59	48.263	1413	1406.4	6.599	1597.81	1571.99	25.824	1563.49	1521.11	42.38	1677.09	1548.4	128.689	1473.48	1457.26	16.217	1648.1	1607.9	40.196	1532.52	1512.35	20.17	1535.8	1441.47	94.33	1352.78	1274.97	77.81	1505.73	1479.88	25.86	1134.71	1132.15
1597.86	1520.2	77.652	1378.28	1237.84	140.442	1301.03	1233.64	67.396	1490.58	1473.83	16.75	1506.94	1474.34	32.599	1544.42	1506.76	37.663	1422.38	1409.69	12.696	1589.19	1567.98	21.213	1553.33	1523.86	29.468	1684.4	1545.2	139.201	1477.88	1456.74	21.137	1646.11	1615.91	30.193	1527.28	1512.71	14.575	1516.83	1439.82	77.005	1353.14	1273.14	80.002	1488.58	1479.26	9.32	1122.01	1127.53
1545.15	1519.68	25.47	1387.39	1239	148.39	1302.84	1237.88	64.961	1481.69	1475.18	6.507	1511.96	1473.51	38.458	1546.9	1502.54	44.367	1426.91	1410.51	16.397	1576.36	1563.95	12.409	1549.4	1522.17	27.233	1659.16	1552.32	106.842	1469.92	1457.1	12.824	1650.86	1608.69	42.172	1513.74	1507.8	5.939	1494.99	1434.55	60.443	1355.91	1271.39	84.521	1484.54	1475.21	9.332	1129.03	1132.39
1512.62	1521.57	-8.951	1374.27	1240.18	134.088	1302.39	1236.81	65.579	1475.02	1472.58	2.441	1505.98	1469.97	36.008	1549.27	1504.57	44.701	1415.54	1418.1	-2.563	1590.17	1565.21	24.965	1559.95	1526.82	33.132	1671.81	1550.53	121.275	1478.74	1455.82	22.927	1649.49	1613.26	36.232	1512.86	1509.2	3.656	1496.92	1436.04	60.881	1348.27	1272.49	75.782	1485.11	1475.91	9.197	1134.87	1128.1
1618.17	1519.56	98.612	1380.77	1237.56	143.208	1306.35	1236.25	70.099	1484.7	1476.42	8.281	1514.81	1468.08	46.728	1547.19	1503.59	43.604	1411	1418.46	-7.468	1585.07	1561.69	23.385	1548.04	1523.2	24.831	1664.52	1541.87	122.646	1470.54	1452.97	17.56	1645.89	1603.86	42.026	1512.51	1504	8.507	1505.82	1427.15	78.674	1350.69	1271.07	79.621	1473.88	1475.37	-1.488	1143.87	1127.25
1595.39	1514.62	80.767	1376.87	1239.25	137.614	1299.38	1238.76	60.618	1485.08	1474.6	10.479	1508.45	1470.95	37.493	1544.63	1498.26	46.369	1408.77	1417.99	-9.215	1581.12	1566.94	14.172	1550.12	1523.27	26.849	1660.55	1549.79	110.758	1473.6	1448.56	25.036	1650.37	1610.57	39.794	1507.83	1511.38	-3.55	1498	1430.08	67.926	1345.58	1270.2	75.373	1463.48	1471.83	-8.353	1134.6	1124.5
1590.14	1514.74	75.398	1361.12	1243.67	117.453	1301.68	1241.1	60.582	1493.94	1474.34	19.594	1515.77	1467.71	48.05	1541.54	1500.72	40.826	1404.01	1410.22	-6.206	1576.32	1567.59	8.731	1545.33	1518.87	26.453	1661.29	1543.56	117.729	1470.37	1447.31	23.062	1652.2	1607.37	44.824	1514.11	1504.71	9.397	1504.92	1425.58	79.346	1347.68	1272.62	75.062	1464.84	1470.27	-5.433	1135.97	1128.93
1569.54	1513.43	56.111	1371.21	1238.63	132.577	1305.48	1243.23	62.251	1486.42	1473.51	12.913	1518.95	1461.89	57.059	1540.85	1502.95	37.899	1398.93	1411.87	-12.945	1577.25	1566.05	11.203	1541.87	1521.5	20.369	1655.66	1550.36	105.302	1460.88	1449.61	11.265	1654.37	1609.74	44.623	1527.9	1511.32	16.588	1525.9	1430.12	95.784	1348.83	1273.98	74.851	1464.67	1473.64	-8.968	1133.73	1130.72
1582.91	1516.93	65.977	1360.67	1238.43	122.245	1314.16	1242.41	71.745	1493.74	1469.97	23.765	1520.88	1460.64	60.245	1552.43	1502.46	49.971	1398.17	1401.15	-2.973	1570.39	1561.58	8.806	1536.17	1519.1	17.065	1636.21	1545.15	91.059	1462.1	1440.55	21.551	1654.89	1599.17	55.715	1530.6	1507.66	22.935	1517.96	1421.31	96.654	1352.72	1274.48	78.241	1482.81	1473.21	9.597	1134.19	1127.07
1595.5	1506.5	89.001	1350.6	1233.2	117.396	1306.88	1242.09	64.796	1488.7	1468.08	20.623	1515.25	1470.68	44.575	1531.29	1497.44	33.846	1385.04	1392.65	-7.608	1569.93	1561.07	8.859	1531.76	1515.54	16.214	1626.08	1545.33	80.752	1474.57	1438.98	35.588	1647.44	1597.77	49.671	1526.28	1504.69	21.589	1540.2	1420.61	119.594	1346.08	1273.97	72.107	1480.11	1472.22	7.894	1136.99	1127.18
1600.22	1508.76	91.455	1352.08	1237.89	114.193	1301.78	1247.01	54.768	1494.73	1470.95	23.78	1521.13	1460.38	60.752	1544.62	1498.32	46.306	1390.35	1393.69	-3.342	1573.34	1552.34	21.004	1514.51	1517.27	-2.762	1618.54	1541.26	77.277	1469.28	1434.77	34.513	1653.01	1599.63	53.373	1514.99	1499.27	15.722	1542.8	1418.68	124.126	1357.54	1279.21	78.327	1481.1	1473.31	7.789	1134.74	1127.46
1595.88	1504.85	91.027	1351.26	1232.49	118.769	1296.65	1248.4	48.251	1490.82	1467.71	23.102	1520.53	1462.74	57.787	1538.89	1493.46	45.429	1386.57	1390.54	-3.976	1569.06	1553.05	16.014	1525.03	1511.55	13.482	1638.81	1543.21	95.603	1476.42	1428.54	47.876	1669.24	1600.53	68.713	1513.65	1500.21	13.437	1541.74	1414.12	127.62	1363.96	1275.03	88.929	1476.29	1468.04	8.254	1122.73	1121.56
1568.77	1499.98	68.796	1342.09	1231.18	110.91	1295.24	1247.8	47.439	1490.87	1461.89	28.978	1518.4	1456.39	62.004	1538.98	1493.12	45.866	1383.04	1386.38	-3.337	1572.76	1553.42	19.343	1517.6	1509.7	7.897	1635.62	1542.52	93.094	1472.54	1429.83	42.709	1643.32	1598.21	45.104	1514.72	1495.01	19.708	1563.4	1411.29	152.119	1362.19	1271.2	90.99	1484.81	1461.39	23.427	1121.65	1120.56
1601.78	1496.86	104.926	1337.54	1231.03	106.507	1296.51	1251.1	45.412	1486.7	1460.64	26.056	1524.19	1461.65	62.539	1536.24	1487.51	48.734	1378.36	1381.31	-2.952	1566.65	1555.79	10.866	1516.64	1509.51	7.134	1634	1545.46	88.54	1478.04	1422.7	55.332	1649	1595.4	53.598	1516.98	1498.06	18.921	1599.94	1417.52	182.423	1357.48	1272.08	85.404	1477.07	1463.31	13.763	1123.08	1122.7
1612.66	1504.83	107.839	1336.57	1232.42	104.15	1306.78	1261.9	44.875	1489.24	1470.68	18.561	1529.71	1461.79	67.924	1535.38	1492.51	42.87	1386.89	1386.92	-0.027	1565.19	1545.89	19.291	1511.47	1506.88	4.592	1625.2	1540.53	84.673	1489.53	1424.79	64.737	1639.05	1587.81	51.232	1540.18	1490.85	49.34	1618.15	1409.64	208.508	1359.09	1267.06	92.037	1467.59	1464.02	3.576	1118.55	1124.39
1621.89	1502.26	119.627	1329.92	1230.35	99.567	1305.5	1256.94	48.563	1477.49	1460.38	17.108	1525.92	1457.64	68.279	1528.89	1489.42	39.467	1380.28	1381.42	-1.14	1575.3	1552.93	22.368	1523.41	1514.23	9.184	1636.22	1550.6	85.625	1513.77	1420.76	93.012	1635.94	1599.78	36.159	1555.33	1492.95	62.385	1637.24	1414.35	222.889	1362.13	1269.7	92.433	1470.87	1460	10.876	1113.39	1119.81
1626.02	1497.81	128.21	1330.21	1232.82	97.39	1302.47	1257.3	45.166	1491.78	1462.74	29.03	1524.24	1457.37	66.873	1530.83	1491.94	38.882	1421.04	1380.82	40.223	1576.31	1544.95	31.364	1514.92	1504.03	10.891	1633.14	1537.95	95.191	1511.59	1414.53	97.059	1631.94	1596.63	35.317	1562.07	1493.54	68.529	1639.78	1407.85	231.931	1359.36	1269.38	89.983	1465.29	1465.39	-0.096	1126.97	1124.23
1618.86	1496.16	122.704	1324.18	1226.81	97.376	1300.83	1253.44	47.395	1482.43	1456.39	26.033	1511.99	1459.56	52.431	1535.47	1489.47	46.001	1406.33	1377.79	28.539	1556.67	1550.09	6.58	1508.7	1501.38	7.311	1617.96	1536.86	81.107	1497.26	1417.27	79.988	1617.36	1595.08	22.277	1551.64	1489.49	62.143	1635.6	1406.32	229.279	1348.87	1263.85	85.017	1456.77	1459.31	-2.541	1120.19	1118.72
1660.35	1493.11	167.242	1320.74	1228.92	91.814	1303.31	1255.54	47.769	1489.83	1461.65	28.174	1516.3	1452.32	63.984	1530.06	1487.79	42.279	1402.39	1383.51	18.88	1563.3	1544.12	19.176	1512.62	1505.66	6.952	1613.4	1538.64	74.759	1537.88	1414.61	123.272	1633.58	1594.1	39.48	1551.28	1492.05	59.226	1637.45	1400.92	236.533	1344.18	1266.82	77.362	1456.98	1462.21	-5.227	1113.4	1123.87
1670.38	1489.44	180.942	1318.6	1228.52	90.074	1295.34	1254.85	40.49	1477.41	1461.79	15.626	1507.84	1457.81	50.034	1528.93	1486.52	42.41	1388.49	1371.07	17.418	1567.48	1546.58	20.902	1510.26	1509.94	0.319	1613.27	1542.9	70.373	1569.06	1412.13	156.926	1626.3	1597.58	28.718	1562.15	1493.09	69.064	1645.7	1399.51	246.199	1340.57	1266.02	74.553	1456.23	1459.23	-3	1114.98	1115.14
1682.51	1493.83	188.675	1321.04	1231.85	89.195	1293.24	1257.48	35.752	1481.6	1457.64	23.965	1514.06	1451.8	62.264	1532.21	1489.3	42.916	1392.81	1376.67	16.135	1559.46	1544.97	14.495	1503.28	1501.3	1.981	1623.08	1540.55	82.526	1589.21	1408.01	181.205	1633.35	1591.64	41.712	1552.12	1486.6	65.52	1689.2	1401.11	288.09	1343.24	1262.78	80.467	1451.75	1457.74	-5.988	1114.03	1121.93
1693.16	1486.58	206.585	1313.99	1227.53	86.462	1281.69	1252.32	29.368	1482.59	1457.37	25.223	1513.26	1456.51	56.75	1532.08	1486.53	45.556	1393.05	1372.17	20.878	1557.63	1542.26	15.369	1508.04	1501.03	7.013	1632.15	1538.53	93.617	1594.59	1409.47	185.116	1636.47	1589.44	47.026	1548.25	1486.33	61.924	1688.35	1397.5	290.844	1345.3	1261.57	83.731	1457.14	1459.39	-2.258	1114.41	1118.64
1670.42	1490.43	179.994	1308.98	1232.3	76.682	1280	1253.49	26.507	1480.72	1459.56	21.155	1514.93	1450.38	64.557	1529.93	1490.06	39.868	1392.98	1378.53	14.452	1558.87	1542.55	16.319	1508.25	1502.63	5.623	1619.72	1539.29	80.433	1602.9	1403.13	199.774	1640.09	1585.05	55.043	1545.86	1488.21	57.643	1667.38	1397.76	269.617	1343.29	1258.89	84.401	1459.57	1457.35	2.224	1108.37	1119.31
1630.51	1489.41	141.095	1300.94	1225.98	74.959	1278.71	1251.41	27.291	1471.69	1452.32	19.378	1505.53	1454.85	50.682	1524.16	1484.81	39.346	1392.3	1373.6	18.708	1561.45	1543.13	18.317	1504.38	1503.56	0.824	1619.93	1543.08	76.855	1617.27	1405.73	211.541	1645.11	1587.52	57.583	1547.54	1487.67	59.867	1670.02	1398.93	271.082	1332.09	1255.76	76.325	1457.95	1457.71	0.241	1115.62	1118.53
1574.64	1491.8	82.845	1306.08	1230.01	76.064	1276.35	1255.1	21.252	1470.19	1457.81	12.386	1496.89	1450.13	46.767	1528.36	1488.1	40.262	1404.13	1375.14	28.993	1558.2	1538.94	19.263	1505.29	1497.67	7.613	1626.78	1536.36	90.415	1617.43	1404.56	212.877	1628.43	1589.6	38.836	1529.92	1479.18	50.74	1631.47	1394.76	236.709	1346.63	1257.3	89.327	1451.93	1453.72	-1.793	1108.49	1118.19
1512.88	1489.13	23.75	1298.55	1223.56	74.995	1273.61	1248.86	24.744	1469.46	1451.8	17.666	1493.15	1448.99	44.167	1523.38	1482.96	40.413	1400.13	1373.15	26.976	1565.54	1540.22	25.319	1494.69	1503.71	-9.014	1621.83	1539.09	82.739	1628.17	1402.07	226.099	1639.92	1587.37	52.553	1516.73	1485.47	31.26	1645.33	1390.05	255.274	1341.57	1254.66	86.909	1446.77	1457.2	-10.425	1112.66	1119.15
1682.04	1498.57	183.463	1299.38	1231.19	68.19	1280.42	1254.15	26.268	1466.72	1456.51	10.21	1500.9	1445.18	55.713	1522.15	1484.13	38.019	1393.99	1374.81	19.176	1558.76	1538.41	20.349	1492.72	1496.12	-3.397	1621.47	1539.7	81.771	1627.1	1399.4	227.698	1640.04	1583.68	56.362	1515.1	1484.18	30.921	1671.78	1389.44	282.339	1342.41	1255.6	86.811	1444.55	1452.68	-8.124	1102.03	1118.43
1675.38	1489.25	186.127	1300.45	1223.89	76.554	1274.55	1247.1	27.451	1462.79	1450.38	12.414	1497.91	1450.72	47.19	1516.15	1479.8	36.353	1394.05	1377.29	16.758	1564.28	1540.5	23.783	1494.68	1497.17	-2.488	1616.46	1534.24	82.22	1617.39	1403.77	213.618	1629.87	1587.77	42.1	1554.62	1478.78	75.832	1641.45	1385.23	256.221	1338.14	1247.58	90.565	1442.4	1448.53	-6.123	1101.5	1113.23
1674.29	1499.61	174.677	1312.61	1224.57	88.041	1278.75	1251.9	26.852	1463.33	1454.85	8.482	1496.65	1449.58	47.068	1517.01	1483.02	33.985	1396.79	1374.4	22.393	1571.04	1536.82	34.211	1489.28	1492.24	-2.966	1615.35	1527.79	87.558	1601.94	1395.95	205.988	1630.96	1581.45	49.515	1554.01	1474.95	79.061	1613.12	1384.8	228.32	1335.01	1246.93	88.08	1443.57	1454.56	-10.997	1100.63	1115.02
1622.34	1494.22	128.114	1305.85	1224.77	81.074	1267.46	1253.76	13.705	1464.78	1450.13	14.655	1491.06	1449.27	41.79	1509.95	1481.9	28.049	1387.6	1380.03	7.567	1575.39	1532.91	42.473	1494.58	1492.73	1.85	1616.06	1531.21	84.842	1592.06	1398.05	194.006	1611.33	1579.44	31.888	1544.76	1478.59	66.166	1600.05	1389.58	210.472	1333.9	1245.03	88.865	1449.39	1449.77	-0.371	1089.6	1116.12
1699.87	1496.26	203.608	1305.5	1225.86	79.641	1270.21	1254.01	16.197	1464.27	1448.99	15.279	1494.41	1449.52	44.892	1515.42	1485.38	30.04	1374.69	1377.73	-3.035	1575.71	1531.27	44.441	1489.5	1485.52	3.977	1610.9	1531.92	78.98	1574.89	1394.36	180.538	1605.8	1571.95	33.846	1532.12	1472.6	59.522	1627.41	1386.19	241.225	1331.42	1239.09	92.331	1441.71	1445.36	-3.649	1091.32	1112.89
1684.78	1492.97	191.806	1301.46	1220.92	80.535	1265.09	1250.58	14.502	1452.58	1445.18	7.395	1483.51	1445.1	38.406	1508.43	1481.91	26.521	1373.83	1375.73	-1.895	1607.44	1540.67	66.775	1494.63	1495.46	-0.827	1620.3	1536.25	84.051	1574.48	1392.41	182.071	1620.16	1581.64	38.518	1533.43	1474.61	58.82	1643.24	1392.33	250.905	1323.83	1242.04	81.794	1441.77	1450.57	-8.794	1086.1	1112.66
1685.24	1494.86	190.38	1299.48	1224.05	75.431	1263.37	1253.14	10.225	1463.12	1450.72	12.403	1482.31	1445.06	37.253	1511.84	1479	32.836	1370.21	1374.87	-4.667	1595.35	1534.32	61.032	1483.68	1483.91	-0.225	1612.2	1531.3	80.902	1539.03	1386.93	152.094	1608.23	1575.7	32.525	1518.24	1469.91	48.33	1609.55	1387.12	222.428	1316.05	1237.81	78.243	1442.13	1445.4	-3.272	1083.06	1111.39
1679.01	1495.28	183.732	1297.71	1224.04	73.668	1260.03	1257.32	2.71	1459.19	1449.58	9.612	1486.04	1442.17	43.866	1515.69	1482.94	32.754	1373.08	1380.48	-7.398	1594.73	1535.01	59.716	1494.05	1489.84	4.204	1617.92	1533.66	84.256	1504.49	1394.85	109.641	1612.3	1581.49	30.816	1530.69	1476.79	53.905	1575.14	1395.27	179.871	1313.53	1235.71	77.817	1440.27	1452.18	-11.903	1084.99	1114.34
1664.61	1493.4	171.211	1297.52	1225.09	72.435	1261.57	1258.46	3.11	1456.7	1449.27	7.432	1479.91	1448.66	31.249	1518.14	1483.2	34.938	1367.48	1382.81	-15.333	1597.11	1533.71	63.4	1487.43	1486.29	1.144	1610.15	1529.48	80.669	1462.58	1391.6	70.974	1603.67	1574.11	29.56	1511.31	1471.77	39.537	1501.87	1396.47	105.401	1319.88	1231.7	88.184	1443.79	1443.81	-0.018	1085.79	1112.85
1630.59	1487.76	142.828	1289.61	1220.84	68.775	1255.49	1253.09	2.395	1456.05	1449.52	6.527	1470.78	1443.63	27.143	1512.77	1475.12	37.653	1366.46	1379.25	-12.791	1602.3	1533.09	69.211	1489.41	1482.67	6.735	1611.82	1533.99	77.829	1554.66	1385.65	169.009	1595.57	1575.62	19.959	1506.18	1470.53	35.65	1607.89	1400.05	207.846	1310.34	1226.53	83.809	1446.24	1444.26	1.987	1087.73	1112.28
1593.46	1488.51	104.948	1283.14	1221.77	61.375	1260.1	1250.79	9.312	1454.13	1445.1	9.03	1468.98	1444.65	24.328	1508.79	1474.38	34.412	1367.71	1377.86	-10.14	1609.6	1532.07	77.536	1483.51	1474.72	8.789	1612.53	1526.88	85.651	1539.62	1383.19	156.43	1600.24	1571.12	29.121	1502.67	1468.1	34.572	1609.82	1394.82	215.003	1306.21	1223.96	82.249	1436.21	1439.59	-3.381	1094.68	1109.92
1557.05	1486.48	70.576	1287.25	1217.93	69.325	1252.69	1249.49	3.195	1452.22	1445.06	7.162	1463.98	1445.05	18.933	1511.31	1475.53	35.787	1398.44	1381.81	16.633	1617.82	1530.97	86.845	1486.9	1476.4	10.493	1610.91	1534.13	76.788	1534.01	1388.12	145.884	1597.04	1575.71	21.325	1495.61	1468.75	26.858	1598.91	1400.01	198.896	1296.41	1220.52	75.895	1431.14	1438.39	-7.251	1085.21	1110.29
1617.52	1478.5	139.021	1283.61	1218.09	65.527	1257.03	1249.2	7.834	1452.44	1442.17	10.269	1463.12	1442.98	20.138	1510.09	1476.44	33.65	1393.99	1381.85	12.145	1615.54	1534.62	80.926	1484.53	1473.65	10.877	1615.39	1525.55	89.842	1530.4	1380.3	150.1	1606.07	1573.1	32.975	1496	1465.94	30.056	1568.53	1396.32	172.213	1302.71	1224	78.715	1431.67	1437.25	-5.577	1087.91	1109.96
1619.69	1481.49	138.2	1277.72	1212.94	64.778	1254.91	1251.45	3.462	1449.4	1448.66	0.741	1464	1443.19	20.805	1509.75	1479.4	30.353	1398.67	1381.41	17.261	1621.36	1532.35	89.01	1476.41	1470.43	5.978	1608.08	1532.43	75.649	1526.7	1380.71	145.993	1606.01	1574.05	31.964	1493.34	1465.93	27.403	1561.76	1402.08	159.686	1299.96	1216.69	83.263	1443.84	1439.02	4.818	1095.83	1108.61
1595.28	1475.48	119.806	1274.7	1213.63	61.069	1256.22	1249.02	7.203	1452.45	1443.63	8.814	1458.38	1441.3	17.082	1511.54	1476.21	35.332	1409.69	1375.37	34.316	1606.32	1524.5	81.828	1477.79	1465.94	11.844	1611.71	1529.96	81.752	1506.07	1384.05	122.022	1608.74	1570.92	37.824	1491.63	1467.21	24.424	1550.38	1397.65	152.73	1298.87	1218.99	79.88	1449.85	1440.37	9.475	1105.72	1108.39
1576.21	1474.12	102.093	1275.14	1213.38	61.757	1253.73	1251.12	2.616	1452.97	1444.65	8.322	1460.93	1445.27	15.658	1510.37	1478.68	31.688	1402.83	1379.38	23.446	1613.16	1528.62	84.542	1478.66	1464.32	14.335	1605.55	1526.81	78.741	1491.42	1380.19	111.229	1608.39	1566.15	42.238	1489.12	1464.32	24.801	1528.64	1398.92	129.712	1290.73	1212.95	77.778	1443.74	1437.89	5.851	1097.31	1110.77
1539.59	1477.02	62.575	1274.99	1215.54	59.452	1257.74	1253.28	4.466	1453.51	1445.05	8.463	1464.64	1441.37	23.268	1511.41	1475.59	35.822	1410.74	1379.87	30.865	1608.88	1529.38	79.501	1481.33	1461.3	20.027	1611.53	1535.69	75.839	1473.73	1385.09	88.648	1621.19	1574.57	46.626	1486.24	1463.27	22.975	1543.61	1401.75	141.856	1285.01	1212.64	72.372	1454	1438.63	15.365	1104.68	1108.11
1584.3	1464.72	119.582	1272.77	1214.3	58.476	1251.09	1247.66	3.426	1439.81	1442.98	-3.167	1461.15	1444.67	16.483	1507.11	1471.43	35.674	1404.04	1374.86	29.177	1602.85	1526.52	76.324	1473.8	1459.44	14.352	1600.69	1524.7	75.995	1455.69	1380.79	74.9	1622.42	1568.65	53.774	1475.54	1463.4	12.139	1534.22	1396	138.226	1281.21	1210.86	70.357	1441.96	1432.33	9.63	1102.55	1105.18
1555.57	1464.8	90.777	1268.32	1212.8	55.526	1253.79	1244.31	9.474	1445.42	1443.19	2.223	1466.28	1443.56	22.72	1502.48	1470.62	31.867	1406.54	1375.83	30.711	1599.48	1523.96	75.519	1468.5	1459.19	9.31	1598.19	1528.07	70.124	1460.81	1380.11	80.697	1609.16	1564.47	44.69	1480.5	1459.04	21.461	1523.85	1402.95	120.908	1286.74	1213.88	72.858	1432.42	1437.08	-4.658	1113.72	1109.24
1525.41	1458.48	66.93	1270.36	1210.38	59.983	1251.03	1245.11	5.917	1445.16	1441.3	3.855	1468.39	1442.28	26.112	1499.32	1470.16	29.167	1399.49	1371.08	28.413	1598.83	1522.99	75.833	1466.49	1453.92	12.572	1597.8	1528.12	69.677	1469.55	1377.68	91.861	1609.86	1569.47	40.385	1472.44	1460.59	11.844	1517.53	1394.96	122.57	1285.94	1206.49	79.454	1427.05	1432.87	-5.818	1108.94	1106.51
1501.37	1462.52	38.856	1265.38	1211.74	53.641	1257.02	1247.75	9.272	1447.92	1445.27	2.653	1466.86	1443.45	23.412	1503.95	1474.01	29.933	1402.65	1375.32	27.323	1605.71	1525.69	80.017	1469.16	1457.05	12.107	1603.46	1527	76.464	1467.62	1378.3	89.325	1621.5	1564.6	56.898	1472.94	1459.36	13.579	1503.12	1401.91	101.21	1295.87	1210.61	85.259	1441.47	1436.26	5.208	1112.97	1107.24
1538.79	1459.53	79.255	1264.43	1209.67	54.761	1256.34	1246.62	9.713	1455.31	1441.37	13.944	1474.61	1445.81	28.794	1506.45	1471.79	34.657	1398.71	1373.93	24.782	1596.56	1526.54	70.021	1468.95	1457.57	11.384	1614.31	1529.49	84.817	1455.5	1379.31	76.187	1620.28	1567	53.277	1473.88	1461.59	12.284	1519.27	1403.2	116.073	1294.54	1206.05	88.489	1441.88	1434.68	7.201	1112.85	1104.35
1510.69	1461.94	48.753	1265.51	1212.77	52.737	1259.53	1245.59	13.945	1447.77	1444.67	3.102	1472.88	1442.36	30.513	1519.51	1473.68	45.829	1393.51	1373.84	19.673	1592.52	1523.86	68.668	1468.21	1458.63	9.576	1606.38	1533.14	73.241	1450.67	1384.4	66.267	1637.29	1569.19	68.104	1481.14	1464.14	16.997	1528.97	1401.07	127.902	1290.68	1209.11	81.577	1450.85	1439.14	11.709	1111.62	1104.9
1475.29	1456.3	18.991	1265.04	1213.4	51.633	1268.18	1246.14	22.042	1442.82	1443.56	-0.738	1473.51	1435.1	38.412	1512.81	1477.28	35.531	1385.89	1374.33	11.564	1607.79	1527.58	80.21	1468.74	1459.45	9.291	1613.34	1537.03	76.31	1439.97	1387.94	52.024	1632.02	1570.79	61.233	1484.47	1463.03	21.441	1530.61	1403.76	126.85	1285.56	1209.51	76.051	1453.12	1435.93	17.186	1115.56	1105.08
1459.31	1457.18	2.132	1270.99	1214.64	56.347	1273.69	1248.48	25.212	1450.83	1442.28	8.55	1475.58	1434.68	40.896	1517.71	1478.52	39.194	1386.43	1382.83	3.595	1599.66	1531	68.657	1466.08	1457.2	8.877	1613.19	1536.11	77.085	1446.32	1382.53	63.797	1626.95	1568.37	58.581	1479.09	1463.05	16.041	1513.75	1404.08	109.665	1284.35	1213.72	70.633	1458.1	1442.9	15.203	1123.84	1111.61
1503.55	1450.85	52.702	1263.14	1211.47	51.671	1272.13	1247.89	24.241	1453.82	1443.45	10.374	1470.48	1439.81	30.67	1511.34	1475.22	36.118	1382.76	1376.52	6.24	1592.54	1523.7	68.833	1468.23	1456.36	11.878	1613.7	1538.77	74.924	1442.76	1380.76	61.997	1635.84	1562.33	73.511	1471.68	1459.64	12.038	1494.34	1397.31	97.024	1275.44	1206.71	68.737	1452.59	1438.97	13.619	1122.14	1109.83
1502.86	1448.13	54.727	1264.63	1213.53	51.103	1272.62	1248.4	24.214	1450.17	1445.81	4.357	1478.31	1437.22	41.084	1516.57	1478.92	37.645	1390.22	1381.28	8.942	1597.1	1529.64	67.453	1464.22	1459.38	4.84	1618.34	1536.58	81.769	1435.21	1377.08	58.132	1630.72	1571.3	59.429	1479.12	1465.91	13.216	1497.18	1401.46	95.721	1270.96	1210.81	60.148	1448.49	1438.12	10.374	1123.05	1107.75
1501.7	1443.54	58.153	1255.83	1211.61	44.218	1263.35	1245.65	17.703	1445.89	1442.36	3.522	1476.84	1440.68	36.165	1508.19	1472.94	35.255	1382.65	1374.16	8.492	1590.97	1528.55	62.422	1462.25	1459.87	2.379	1621.01	1535.22	85.787	1431.83	1378.37	53.464	1619.46	1565.35	54.104	1471.51	1463.72	7.783	1508.62	1401.82	106.805	1280.82	1206.9	73.915	1443.63	1439.96	3.669	1115.29	1104.48
1497.98	1440.84	57.147	1252.44	1202.55	49.898	1257.07	1241.48	15.59	1449.15	1435.1	14.05	1470.21	1433.72	36.49	1507.01	1469.88	37.125	1375.45	1374.51	0.946	1589.56	1525.46	64.099	1457.37	1458.64	-1.271	1601.17	1532.46	68.711	1449.37	1377.05	72.324	1604.63	1562.52	42.105	1467.63	1457.96	9.668	1498.6	1397.87	100.733	1273.96	1207.15	66.804	1448.98	1430.96	18.019	1110.48	1102.76
1487.6	1441.04	46.557	1252.81	1199.54	53.265	1256.18	1238.48	17.702	1448.81	1434.68	14.126	1467.97	1440.94	27.027	1507.86	1471.52	36.34	1369.11	1374.48	-5.372	1578.12	1527.46	50.659	1453.41	1455.03	-1.614	1601.87	1532.17	69.706	1445.09	1375.99	69.103	1591.77	1560.88	30.892	1467.65	1458.84	8.81	1485.39	1396.33	89.054	1279.95	1204.88	75.068	1446.91	1440.08	6.832	1117.63	1102.05
1504.9	1443.75	61.157	1254.9	1205.14	49.756	1256.97	1235.76	21.215	1446.79	1439.81	6.979	1466.04	1434.95	31.091	1510.16	1474.38	35.778	1381.81	1380.71	1.095	1570.74	1518.24	52.5	1449.22	1452.91	-3.683	1595.42	1531.34	64.074	1456.62	1373.56	83.059	1586.94	1553.93	33.013	1484.14	1455.31	28.835	1475.9	1399.64	76.261	1285.02	1206	79.026	1454.42	1434.62	19.802	1110.92	1098.67
1482.19	1446.21	35.983	1251.67	1198.51	53.157	1248.27	1233.87	14.401	1442.08	1437.22	4.858	1457.57	1437.58	19.991	1495.77	1473.33	22.437	1381.69	1377.82	3.877	1555.3	1524.89	30.407	1448.24	1453.78	-5.543	1604.41	1532.36	72.052	1446.03	1378.05	67.975	1582.13	1566	16.134	1483.74	1459.81	23.929	1480.53	1403.33	77.208	1279.67	1212.1	67.567	1450.72	1438.93	11.788	1114.15	1095.92
1464.85	1443.78	21.07	1250.42	1196.04	54.38	1252.21	1231.72	20.492	1440.72	1440.68	0.039	1451.68	1439.37	12.313	1497.53	1475.07	22.455	1378.91	1381.02	-2.115	1552.23	1521.65	30.589	1454.22	1455.05	-0.83	1601.6	1535.08	66.516	1461.96	1376.35	85.611	1600.75	1562.03	38.722	1476.58	1455.45	21.127	1487.74	1404.8	82.949	1282.55	1202.85	79.697	1451.5	1440.27	11.231	1110.16	1091.35
1449.8	1440.45	9.355	1251.69	1194.84	56.859	1248.29	1231.89	16.401	1437.28	1433.72	3.558	1459	1439.37	19.634	1498.84	1471.85	26.986	1376.71	1374.88	1.832	1552.75	1522.76	29.987	1451.96	1457.2	-5.236	1592.67	1534.62	58.055	1465.38	1374.25	91.133	1610.4	1555.72	54.684	1469.79	1459.53	10.255	1488.21	1406.69	81.517	1276.3	1205.44	70.855	1448.63	1434.37	14.258	1110.19	1087.1
1433.99	1444.82	-10.831	1251	1199.83	51.17	1253.09	1229.86	23.222	1448.65	1440.94	7.703	1456.33	1439.37	16.964	1501.82	1473.2	28.62	1371.96	1380.56	-8.592	1544.78	1520.94	23.836	1450.56	1455.37	-4.811	1587.22	1536.26	50.958	1464.07	1378.16	85.91	1617.29	1556.79	60.499	1467.34	1453.46	13.881	1489.51	1403.6	85.906	1279.79	1214.62	65.168	1447.73	1437.76	9.969	1107.57	1086.87
1522.6	1442.59	80.013	1253.38	1195.08	58.3	1253.48	1232.83	20.643	1443.81	1434.95	8.866	1446.76	1439.37	7.395	1496.68	1468.88	27.797	1373.4	1381.3	-7.9	1547.76	1524.65	23.114	1451.68	1454.52	-2.834	1603.86	1535.63	68.228	1480.06	1378.3	101.756	1614.34	1559.33	55.012	1468.7	1455.96	12.737	1492.21	1405.3	86.912	1275.73	1205.8	69.927	1438.77	1429.7	9.065	1100.9	1078.94
1536.29	1449.41	86.871	1256.41	1198.01	58.394	1254.44	1232.68	21.757	1435.17	1437.58	-2.409	1452.11	1439.37	12.747	1499.94	1476.8	23.143	1376.84	1387.16	-10.322	1545.9	1523.34	22.561	1449.45	1449.21	0.242	1607.78	1533.59	74.194	1504.52	1374.73	129.789	1610.17	1559.99	50.186	1455.62	1457.65	-2.04	1483.51	1401.59	81.915	1283.12	1213.02	70.107	1447.26	1432.66	14.599	1105.43	1083.76
1539.86	1448.04	91.813	1254.6	1196.18	58.416	1250.92	1232.24	18.68	1445.68	1439.37	6.313	1452.11	1439.37	12.747	1491.05	1472.3	18.755	1371.86	1378.14	-6.285	1542.38	1518.95	23.43	1449.12	1451.77	-2.651	1605.56	1531.86	73.697	1503.99	1371.72	132.272	1609.5	1551.44	58.057	1460.17	1454.55	5.621	1470.52	1394.57	75.955	1276.36	1209.56	66.795	1439.82	1427.12	12.7	1100.35	1074.83
[truncated: 88 more columns]

## Sheet: 251012
field7_cell2avg	field7_cell2bkg	field7_cell2sub	field7_cell3avg	field7_cell3bkg	field7_cell3sub	field8_cell1avg	field8_cell1bkg	field8_cell1sub	field8_cell2avg	field8_cell2bkg	field8_cell2sub	field8_cell4avg	field8_cell4bkg	field8_cell4sub	field8_cell5avg	field8_cell5bkg	field8_cell5sub	field9_cell1avg	field9_cell1bkg	field9_cell1sub	field9_cell2avg	field9_cell2bkg	field9_cell2sub	field9_cell4avg	field9_cell4bkg	field9_cell4sub	field9_cell5avg	field9_cell5bkg	field9_cell5sub	field10_cell1avg	field10_cell1bkg	field10_cell1sub	field10_cell2avg	field10_cell2bkg	field10_cell2sub	field10_cell3avg	field10_cell3bkg	field10_cell3sub	field10_cell4avg	field10_cell4bkg	field10_cell4sub	field10_cell6avg	field10_cell6bkg	field10_cell6sub	field10_cell7avg	field10_cell7bkg	field10_cell7sub	field10_cell10avg	field10_cell10bkg
1307.82	1278.18	29.648	1837.44	1418.58	418.865	1369.29	1277.01	92.285	1565.03	1315.38	249.647	1503.4	1355.88	147.519	1408.46	1342.86	65.599	1896	1385.69	510.312	1535.36	1411.66	123.701	1367.2	1298.45	68.749	1395.11	1276.41	118.698	1227.95	1147.08	80.876	1206.07	1164.36	41.712	1382.23	1296.17	86.062	1525.67	1390.67	135.005	2047.61	1404.04	643.563	1586.78	1338.67	248.104	1193.05	1203.78
1296.55	1271.23	25.318	1780.76	1411.53	369.237	1356.57	1260	96.576	1508.87	1299.34	209.529	1489.67	1338.1	151.57	1385.28	1327.1	58.176	1802.71	1373.01	429.7	1512.31	1400.44	111.878	1352.72	1285.67	67.053	1354.06	1258.04	96.023	1223.39	1141.75	81.641	1224.48	1145.07	79.407	1367.92	1290.99	76.937	1500.58	1389.21	111.368	2019.46	1392.53	626.926	1515.55	1326.39	189.163	1175.51	1196.97
1281.75	1257.23	24.513	1741.74	1397.75	343.992	1338.51	1245.48	93.029	1527.48	1289.31	238.171	1470.81	1328.88	141.936	1363.15	1321.71	41.439	1780.62	1361.04	419.584	1516.52	1396.04	120.471	1363.02	1286.61	76.41	1361.16	1250.18	110.982	1215.98	1138.11	77.87	1195.95	1143.28	52.667	1359.54	1287.37	72.164	1499.94	1381.57	118.369	1846.56	1383.73	462.833	1501.03	1317.37	183.652	1179.67	1194.2
1265.8	1249.88	15.916	1732.53	1374.55	357.982	1316.02	1231.3	84.721	1513.8	1272.73	241.069	1424.34	1314.21	110.129	1349.27	1308.02	41.251	1755.75	1349.47	406.278	1486.75	1380.98	105.773	1348.68	1267.67	81.011	1339.84	1238.01	101.826	1209.33	1132.48	76.844	1186.08	1134.53	51.557	1345.84	1279.17	66.675	1470.86	1376.29	94.568	1936.77	1376.61	560.155	1512.29	1318.29	193.994	1166.94	1181.48
1265.71	1249.37	16.343	1739.67	1374.03	365.637	1299.3	1236.45	62.856	1507.21	1273.29	233.926	1421.25	1314.43	106.815	1348.17	1297.41	50.761	1722.84	1356.89	365.95	1483.35	1381.17	102.184	1336.67	1270.18	66.483	1323.7	1245.47	78.229	1224.65	1127.02	97.628	1184.59	1137.69	46.902	1338.78	1274.28	64.495	1475.97	1368.37	107.594	1901.71	1376.85	524.863	1474.87	1310.24	164.637	1156.22	1184.75
1260.72	1245.97	14.753	1787.74	1379.34	408.394	1304.58	1227.13	77.449	1551.12	1274.87	276.254	1442.36	1307.95	134.411	1359.02	1306.05	52.972	1717.82	1349	368.826	1487.52	1373.84	113.68	1345.27	1272.19	73.081	1320.25	1243.52	76.731	1227.74	1129.65	98.094	1181.36	1131.59	49.768	1339.89	1268.56	71.326	1483.05	1370.99	112.057	1926.05	1375.35	550.697	1530.81	1303.92	226.887	1159.73	1178.49
1271.94	1247.88	24.053	1753.22	1372.4	380.829	1293.58	1229.28	64.3	1521.96	1274.79	247.175	1437.47	1309.52	127.952	1370.68	1303.48	67.2	1699.1	1357.1	342.002	1496.19	1382.42	113.767	1358.96	1267.66	91.299	1322.07	1246	76.069	1242.11	1130.15	111.956	1168.53	1136.51	32.017	1341.35	1281.13	60.217	1466.35	1370.24	96.113	1835.77	1377.7	458.07	1510.12	1306.04	204.073	1173.6	1173.98
1274.42	1238.88	35.538	1767.11	1380.7	386.406	1303	1232.34	70.66	1542.28	1276.81	265.473	1457.68	1307.94	149.742	1342.41	1302.07	40.338	1696.18	1351.51	344.671	1489.63	1379.28	110.346	1338.93	1268.11	70.818	1294.41	1243.09	51.317	1237.01	1135.01	101.998	1153.13	1139	14.13	1334.02	1272.9	61.118	1465.41	1366.56	98.852	1959.52	1376.15	583.373	1528.9	1293.81	235.086	1166.65	1172.17
1255.03	1246.89	8.139	1735.35	1371.82	363.528	1292.1	1238.28	53.813	1516.64	1276.55	240.092	1444.52	1305.61	138.906	1372.34	1298.99	73.354	1674.42	1353.6	320.825	1472.05	1384.26	87.787	1345.43	1270.06	75.365	1311.33	1233.7	77.636	1239.81	1136	103.814	1187.03	1137.7	49.325	1326.98	1283.21	43.771	1469.72	1364.81	104.909	1880.4	1378.67	501.73	1461.59	1300.74	160.846	1159.7	1174.84
1267.7	1241.13	26.566	1757.61	1375.47	382.144	1299.39	1228.07	71.322	1536.53	1275.26	261.272	1439.9	1314.01	125.895	1359.15	1298.07	61.083	1682.66	1360.56	322.103	1477.31	1381.3	96.012	1331.66	1272.67	58.992	1291.08	1238.37	52.708	1235.98	1128.25	107.73	1171.8	1133.99	37.806	1337.34	1274.13	63.201	1461.32	1367.14	94.186	1863.61	1374.34	489.266	1445.94	1297.32	148.615	1170.73	1171.82
1271.92	1253.75	18.171	1769.49	1378.43	391.061	1297.15	1237.04	60.108	1542.13	1275.73	266.399	1482.89	1315.14	167.749	1370.87	1303.27	67.595	1677.09	1353.78	323.303	1470.16	1376.99	93.167	1347.18	1264.49	82.688	1289.92	1244.43	45.486	1238.41	1129.34	109.076	1163.36	1140.86	22.505	1332.95	1274.31	58.645	1466.98	1368.68	98.301	1951.36	1375.09	576.262	1542.55	1303.74	238.806	1177.22	1179.1
1275.85	1244.28	31.563	1779.5	1376.86	402.639	1292.79	1229.33	63.462	1537.85	1273.83	264.023	1458.8	1313.22	145.576	1373.47	1295.4	78.069	1683.31	1350.55	332.759	1473.47	1371.32	102.149	1331.59	1271.53	60.062	1296.09	1241.26	54.829	1251.69	1134.99	116.699	1164.79	1139.29	25.502	1335.51	1273.99	61.525	1472.88	1370.55	102.331	1936.93	1369.81	567.122	1492.43	1294.52	197.911	1181.15	1174.59
1269.18	1250.43	18.749	1773.1	1375.24	397.856	1304.35	1232.31	72.047	1551.8	1273.9	277.902	1488.09	1307.96	180.128	1376.36	1307.82	68.543	1660.43	1354.44	305.988	1472.26	1386.22	86.03	1344.84	1278.82	66.022	1287.08	1241.14	45.941	1249.21	1131.39	117.82	1167.03	1133.51	33.519	1327.89	1268.38	59.518	1455.81	1366.96	88.852	2029.67	1371.39	658.282	1523.09	1288.52	234.571	1178.5	1175.44
1277.59	1242.82	34.766	1777.99	1371.43	406.552	1302.92	1231.35	71.575	1493.98	1276.35	217.629	1465.89	1316.06	149.833	1384.08	1300.13	83.945	1669.87	1354.02	315.841	1470.62	1383.6	87.016	1346.87	1265.27	81.595	1273.56	1243.57	29.992	1259.63	1129.71	129.925	1161.05	1133.6	27.447	1318.87	1275.98	42.887	1449.57	1375.81	73.762	1923.23	1370.67	552.554	1465.14	1296.65	168.484	1194.09	1175.12
1278.24	1246.58	31.665	1798.48	1368.9	429.584	1306.03	1234.06	71.973	1484.23	1279.51	204.718	1479.67	1307.76	171.914	1388.48	1302.79	85.691	1639.25	1358.22	281.034	1470.7	1384.47	86.229	1349.99	1272.15	77.844	1290.11	1243.6	46.506	1242.74	1134.57	108.169	1151.44	1135.09	16.348	1319.23	1274.68	44.553	1452.79	1365.72	87.065	1908.58	1369.18	539.405	1453.49	1294.95	158.546	1175.64	1180.35
1280.83	1252.37	28.465	1769.57	1374.94	394.636	1319.35	1232.13	87.218	1524.16	1280.62	243.536	1482.8	1312.26	170.545	1374.24	1303.87	70.374	1674.59	1354.88	319.715	1463.48	1385.35	78.126	1355.69	1271.07	84.616	1277.8	1241.31	36.489	1251.98	1128.25	123.736	1157.11	1129.7	27.409	1315.96	1274.43	41.53	1451.09	1358.19	92.898	2005.13	1372.54	632.6	1488.52	1300.03	188.49	1184.31	1171.33
1276.44	1245.53	30.917	1718.2	1381.48	336.719	1314.85	1232.45	82.395	1481.2	1275.05	206.146	1485.48	1308.99	176.49	1397.92	1299.27	98.659	1634.55	1360.45	274.099	1473.32	1380.31	93.007	1346.29	1278.97	67.32	1281.12	1240.96	40.167	1240.14	1127.17	112.965	1166.28	1128.48	37.8	1328.95	1279.62	49.328	1449.67	1367.31	82.36	1986.38	1370.53	615.846	1499.13	1295.97	203.153	1191.43	1173.57
1285.78	1248.22	37.551	1755.57	1376.47	379.099	1331.57	1230.35	101.224	1488.05	1279.03	209.022	1497.96	1315.05	182.911	1401.63	1300.22	101.409	1644.81	1358.64	286.173	1477.95	1389.66	88.292	1360.3	1272.12	88.182	1268	1244.63	23.368	1244.77	1126.73	118.038	1169.26	1135.56	33.694	1327.91	1273.46	54.45	1445.32	1362.5	82.825	1972.42	1373.17	599.25	1451.3	1306.9	144.392	1176.87	1179.34
1290.11	1246.84	43.274	1716.18	1383.59	332.59	1326.14	1236.23	89.905	1529.77	1270.44	259.327	1474.96	1306.43	168.526	1402.58	1305.38	97.202	1631.79	1349.41	282.373	1481.25	1383.47	97.778	1381.01	1269.9	111.105	1258.26	1243.25	15.009	1223.24	1126.2	97.04	1173.12	1138.32	34.798	1326.03	1278.57	47.46	1451	1365.37	85.635	2049.72	1371.74	677.985	1403.51	1298.65	104.857	1168.5	1175.01
1293.14	1248.5	44.641	1701.03	1377.83	323.198	1325.27	1233.82	91.448	1511.2	1276.87	234.332	1489.33	1313.54	175.787	1385.57	1297.85	87.718	1669.71	1346.13	323.58	1475.43	1384.19	91.237	1368.81	1268.06	100.743	1258.91	1245.65	13.259	1215.85	1126.61	89.239	1160.82	1130.14	30.686	1330.5	1269.74	60.756	1449.71	1366.65	83.062	2084.64	1372.37	712.264	1500.88	1298.01	202.871	1187.79	1173.17
1287.85	1245.91	41.933	1745.56	1378.8	366.756	1325.16	1239.84	85.319	1491.64	1278.53	213.111	1486.17	1312.5	173.668	1389.32	1301.55	87.767	1662.31	1354.2	308.112	1466.93	1384.94	81.998	1352.29	1267.64	84.65	1270.65	1244.68	25.962	1224.6	1128.5	96.099	1161.64	1136.19	25.45	1322.51	1270.97	51.534	1461.39	1363.02	98.372	2014.63	1366.69	647.937	1476	1300.77	175.228	1190.38	1176.96
1279.82	1242.89	36.93	1722.28	1379.82	342.455	1334.53	1228.32	106.218	1489.39	1275.43	213.966	1476.99	1316.07	160.923	1380.63	1301.26	79.368	1669.16	1351.81	317.357	1464.95	1382.72	82.23	1379.71	1268.77	110.943	1276.69	1244.92	31.771	1216.35	1122.77	93.577	1166.93	1133.58	33.35	1324.7	1280.93	43.771	1457.75	1365.54	92.207	2033.01	1371.67	661.344	1518.45	1304.88	213.569	1169.09	1170.08
1281.97	1243.68	38.294	1701.63	1370.86	330.774	1321.34	1238.47	82.869	1466.83	1280.67	186.158	1458.54	1314.48	144.062	1350.31	1301.64	48.672	1661.35	1348.76	312.594	1469.55	1375.54	94.009	1372.54	1262.83	109.715	1266.1	1242.78	23.317	1213.7	1125.67	88.032	1169.31	1138.64	30.671	1326.09	1271.11	54.984	1456.38	1369.19	87.191	2079.83	1370.78	709.057	1529.72	1290.38	239.346	1177.93	1175.12
1284.67	1249.59	35.073	1692.54	1373.9	318.63	1336.45	1229.26	107.188	1503.85	1276.91	226.935	1481.78	1308.25	173.529	1370.68	1303.47	67.208	1680.16	1354.88	325.288	1464.84	1378.3	86.531	1371.83	1271.81	100.019	1269.11	1240.41	28.69	1204.55	1122.44	82.111	1167.32	1134.47	32.848	1330.34	1273.34	57.005	1467.96	1366.95	101.006	1985.12	1376.56	608.561	1516.3	1295.2	221.107	1162.11	1179.48
1283.11	1245.82	37.284	1627.56	1376.62	250.942	1335.24	1223.73	111.508	1495.15	1268.58	226.567	1461.59	1308.24	153.344	1371.5	1302.36	69.143	1674.86	1355.92	318.943	1467.17	1385.69	81.487	1389.09	1270.46	118.624	1264.82	1239.68	25.135	1187.29	1128.95	58.333	1171.23	1133.34	37.895	1320.87	1271.24	49.633	1467.35	1361.32	106.03	2055.14	1369.6	685.545	1554.15	1297.78	256.37	1164.35	1188.55
1292.52	1247.14	45.373	1575.58	1377.5	198.072	1331.12	1229.78	101.334	1485.4	1273.63	211.767	1456.87	1316.13	140.742	1350.2	1303.51	46.688	1664.06	1345.59	318.472	1467.19	1382.65	84.541	1370.8	1262.94	107.857	1273.23	1239.51	33.717	1204.15	1124.48	79.671	1173.45	1130.59	42.859	1317.17	1275.77	41.397	1476.53	1354.76	121.765	2044.78	1367.76	677.023	1527.24	1289.9	237.347	1166.33	1178.01
1287.79	1247.97	39.822	1581.35	1382.7	198.643	1326.63	1236.91	89.718	1481.56	1275.77	205.784	1458.57	1304.01	154.558	1347.39	1304.21	43.171	1603.53	1349.18	254.356	1476.67	1381.37	95.294	1372.08	1274.59	97.49	1280.93	1242.06	38.868	1199.76	1119.01	80.754	1159.78	1134.35	25.431	1319.42	1269.61	49.816	1489.47	1360.97	128.493	2074.83	1370.16	704.671	1580.5	1295.53	284.97	1178.15	1176.92
1287.35	1245.74	41.612	1543.56	1366.8	176.755	1319.31	1232.28	87.039	1477.35	1276.62	200.727	1441.45	1313.96	127.493	1351.12	1294.57	56.548	1628.2	1357.5	270.702	1461.2	1381.51	79.684	1370.95	1266.67	104.281	1265.67	1241.93	23.743	1192.78	1125.93	66.852	1160.05	1123.47	36.581	1316.4	1271.73	44.673	1479.05	1361.62	117.422	2048.23	1364.37	683.862	1531.14	1296.82	234.32	1183.63	1172.22
1286.78	1246.67	40.106	1562.86	1378.5	184.359	1325.74	1224.63	101.111	1496.52	1271.17	225.353	1449.5	1311.01	138.492	1343.4	1298.3	45.098	1649.26	1351.03	298.228	1461.36	1371.73	89.635	1368.45	1264.91	103.544	1281.97	1241.58	40.39	1193.72	1125.66	68.057	1155.33	1124.88	30.449	1311.52	1270.8	40.722	1477.05	1359.26	117.798	2039.75	1373.15	666.604	1491.3	1303.52	187.776	1173.08	1176.14
1289.66	1245.18	44.481	1549.57	1373.8	175.769	1312.18	1227.34	84.84	1514.4	1272.83	241.58	1457.01	1310.58	146.436	1350.92	1301.88	49.045	1666.5	1347.13	319.37	1457.64	1374.54	83.1	1368.98	1270.76	98.222	1290.2	1243.73	46.467	1198.68	1127.06	71.623	1163.82	1133.97	29.847	1312.62	1272.73	39.888	1482.87	1357.77	125.099	2044.82	1367.47	677.35	1524.36	1292.68	231.679	1183.2	1170.67
1273.28	1242.21	31.069	1547.01	1374.03	172.978	1309.99	1231.31	78.684	1496.75	1274.95	221.804	1435.09	1306.81	128.274	1343.42	1295.45	47.963	1649.66	1350.6	299.061	1469.15	1379.09	90.065	1363.43	1274.85	88.577	1293.32	1238.8	54.518	1220.03	1128.47	91.552	1156.3	1130.65	25.657	1316.54	1269.87	46.674	1490.52	1359.57	130.951	1966.04	1368.63	597.403	1555.13	1294.68	260.446	1175.59	1179.46
1274.03	1241.13	32.893	1567.47	1371.68	195.798	1298.94	1233.53	65.407	1521.96	1273.1	248.864	1423.12	1304.92	118.199	1350.1	1302.54	47.555	1677.4	1349.89	327.512	1466.93	1373.24	93.688	1354.81	1269.45	85.364	1295.34	1235.85	59.497	1227.85	1122.21	105.642	1135.78	1129.39	6.392	1312.87	1273.7	39.164	1491	1362.61	128.394	1962.26	1367.54	594.716	1531.07	1299.58	231.491	1171.49	1177.56
1277.06	1240.85	36.206	1560.45	1369.61	190.842	1296.89	1225.26	71.63	1528.27	1276.58	251.684	1436.16	1309.27	126.89	1343.11	1300.4	42.711	1638.35	1349.19	289.153	1456.26	1382.46	73.797	1350.62	1266.25	84.37	1308.23	1238.72	69.511	1238.22	1122.19	116.025	1137.21	1128.22	8.988	1319.57	1267.76	51.808	1477.13	1363.4	113.726	1988.34	1371.14	617.199	1465.21	1295.48	169.726	1162.8	1181.44
1281.26	1245.38	35.884	1555.49	1374.85	180.639	1295.32	1227.45	67.872	1555.55	1272.16	283.393	1431.43	1310.7	120.73	1334.31	1293.19	41.118	1640.86	1356.22	284.635	1460.58	1382.09	78.49	1338.38	1275.91	62.47	1289.63	1242.79	46.838	1264.33	1129.01	135.325	1146.12	1125.16	20.965	1312.69	1263.72	48.977	1501.67	1361.42	140.255	1942.24	1363.31	578.932	1556.62	1295.94	260.682	1176.6	1175.99
1270.59	1235.64	34.957	1567.05	1371.98	195.069	1288.05	1224.78	63.263	1583.23	1274.76	308.466	1444.24	1311.27	132.975	1332.17	1293.9	38.27	1631.26	1349.64	281.616	1465	1380.33	84.674	1375.42	1271.59	103.828	1302.49	1239.45	63.039	1290.43	1120.59	169.837	1143.86	1128.58	15.276	1319.13	1270.61	48.518	1484.79	1363.99	120.807	1980.11	1357.92	622.189	1506.63	1296	210.629	1176.88	1176.51
1271.86	1240.03	31.83	1568.69	1367.2	201.495	1275.39	1218.72	56.664	1600.17	1267.55	332.616	1454.21	1315.13	139.081	1332.2	1296.17	36.035	1640.01	1347.94	292.063	1451.81	1380.41	71.401	1353.19	1264.52	88.667	1310.9	1246.31	64.591	1316.76	1117.85	198.907	1136.61	1128.36	8.247	1315.28	1261.18	54.098	1487.2	1358.43	128.774	1961.64	1363.98	597.658	1554.2	1296.62	257.58	1166.4	1174.77
1276.38	1234.6	41.786	1623.66	1370.05	253.61	1283.95	1227.97	55.98	1593.15	1269.58	323.573	1453.54	1308.24	145.299	1338.26	1292.52	45.741	1629.72	1346.36	283.37	1447.35	1383.3	64.049	1351.36	1271.27	80.094	1317.4	1237.63	79.771	1330.32	1122.72	207.595	1155.2	1134.27	20.934	1322.56	1263.67	58.891	1476.74	1361.22	115.519	1905.94	1366.7	539.237	1438.71	1292.56	146.149	1178.56	1180.14
1273.49	1234.25	39.237	1616.6	1379.46	237.141	1281.62	1226.86	54.765	1614.26	1277	337.254	1478.13	1309.7	168.429	1334.04	1298.6	35.441	1616.24	1349.77	266.479	1466.64	1373.93	92.71	1334.97	1275.97	59.001	1309.03	1239.36	69.676	1353.56	1120.99	232.561	1157.98	1130.28	27.692	1317.81	1269.91	47.898	1488.69	1357.15	131.543	1967.52	1361.34	606.179	1534.77	1293.13	241.634	1178.96	1173.61
1258.24	1233.05	25.186	1630.27	1366.45	263.828	1283.56	1227.43	56.125	1624.56	1264.45	360.104	1491.6	1300.18	191.418	1336.71	1295.97	40.737	1626.64	1346.57	280.072	1446.91	1382.5	64.408	1338.2	1269.28	68.921	1316.8	1246.06	70.734	1387.05	1119.44	267.61	1150.41	1126.87	23.537	1320.66	1268.67	51.989	1469.78	1361.03	108.752	1962.52	1361.32	601.202	1450.87	1294.33	156.545	1189.82	1172.68
1269.18	1236.63	32.552	1620.98	1368.44	252.542	1292.63	1232.4	60.235	1620.97	1271.17	349.804	1538.22	1301.24	236.985	1335.58	1294.22	41.362	1598.08	1344.82	253.262	1452.5	1380.09	72.409	1351.54	1271.75	79.793	1324.69	1241.81	82.888	1424.44	1124.69	299.749	1140.07	1128.87	11.205	1315.39	1266.2	49.185	1479.02	1353.42	125.597	1923.41	1358.55	564.856	1504.53	1291.66	212.874	1182.44	1174.44
1271.37	1233.23	38.132	1647.38	1370.27	277.118	1298.36	1227.37	70.987	1670.79	1266.99	403.79	1565.05	1307.24	257.811	1338.64	1296.18	42.46	1589.31	1345.76	243.547	1445.95	1381.03	64.923	1349.7	1271.37	78.335	1322.13	1234.72	87.411	1442.13	1123.3	318.827	1145.99	1127.1	18.899	1318.36	1266.89	51.471	1465.96	1360.63	105.333	1863.22	1364.79	498.425	1535.48	1291.29	244.192	1203.77	1168.67
1269.97	1234.64	35.332	1684.64	1369.61	315.035	1296.05	1226.5	69.548	1657.63	1268.88	388.752	1602.9	1302.9	300	1338.77	1297.48	41.282	1521.27	1346.96	174.311	1452.25	1381.19	71.053	1352.29	1274.97	77.323	1331.52	1232.63	98.888	1438.24	1113.92	324.319	1139.92	1128.02	11.901	1323.51	1263.78	59.729	1456.81	1356.46	100.343	1890.05	1362.94	527.11	1550.94	1288.5	262.447	1199.39	1174.8
1270.81	1233.13	37.678	1697.58	1369.27	328.307	1314.25	1224.03	90.213	1661.01	1273.81	387.194	1627.85	1303.27	324.58	1352.65	1293.59	59.059	1493.93	1351.7	142.23	1453.05	1382.35	70.698	1352.85	1282.83	70.016	1320.9	1249.48	71.414	1459.51	1123.93	335.577	1138.88	1125.27	13.618	1326.54	1269.36	57.18	1461.08	1358.18	102.898	1967.6	1370.63	596.971	1537.56	1294.46	243.098	1220.79	1168.14
1265.14	1232.99	32.151	1768.07	1357.05	411.025	1313.35	1223.15	90.196	1619.29	1271.4	347.886	1663.48	1305.29	358.188	1342.59	1299.34	43.25	1482.24	1347.94	134.297	1463.13	1377.15	85.988	1368.4	1274.7	93.705	1308.06	1238.2	69.857	1476.14	1120.04	356.1	1155.04	1128.45	26.592	1321.24	1263.34	57.909	1451.22	1351.61	99.611	1968.09	1363.19	604.905	1497.89	1291.58	206.317	1228.81	1175.17
1267.7	1236.3	31.4	1768.33	1373.13	395.197	1340.41	1224.1	116.314	1601.88	1271.13	330.744	1678.85	1306.11	372.742	1349.51	1293.37	56.14	1463.21	1345.89	117.313	1447.62	1373.67	73.946	1373.44	1273.21	100.235	1319.4	1246	73.397	1473.85	1120.29	353.562	1155.15	1121.46	33.684	1331.47	1267.02	64.448	1447.41	1356.79	90.62	2105.95	1359.97	745.976	1499.73	1294.52	205.213	1240.73	1175.89
1262.22	1239.12	23.098	1850.94	1364.41	486.531	1346.86	1226.2	120.665	1578.89	1265.87	313.023	1728.81	1300.59	428.222	1349.82	1295.33	54.49	1431.46	1346.49	84.978	1454.5	1382.57	71.927	1382.61	1271.78	110.83	1324.81	1236.34	88.47	1464.59	1123.8	340.79	1154.72	1127.86	26.868	1337.87	1264.82	73.041	1431.34	1355.54	75.8	1988.26	1363.64	624.623	1477.22	1288.58	188.634	1247.7	1172.22
1266.56	1235.4	31.159	1797.76	1365.38	432.388	1355.75	1228.69	127.056	1662.3	1272.49	389.807	1712.45	1303.64	408.812	1345.75	1301.05	44.693	1454.14	1342.85	111.291	1448.78	1371.64	77.139	1397.12	1275	122.125	1312.29	1239.6	72.687	1450.08	1117.07	333.013	1141.64	1127.71	13.929	1335.09	1269.2	65.887	1434.24	1362.51	71.725	2045.45	1363.92	681.526	1513.95	1292.79	221.159	1247.73	1174.43
1261.95	1243.13	18.822	1828.93	1366.48	462.442	1386.52	1226.75	159.769	1630.65	1271.79	358.865	1793.7	1305.93	487.777	1357.14	1286.55	70.59	1455.52	1348.13	107.386	1461.48	1371.24	90.236	1401.73	1278.01	123.723	1302.57	1235.93	66.646	1471.71	1120.7	351.007	1155.55	1136.42	19.126	1328.17	1267.02	61.151	1429.19	1356.2	72.984	2110.07	1369.12	740.951	1526.33	1294.04	232.286	1266.53	1170.15
1244.67	1246.35	-1.678	1842.16	1371.25	470.914	1382.11	1222.96	159.147	1645.24	1274.54	370.7	1744.71	1307.43	437.276	1362.7	1297.85	64.848	1470.4	1356.54	113.862	1450.88	1371.79	79.089	1409.45	1271.08	138.37	1291.76	1235.57	56.189	1457.21	1121.58	335.627	1163.12	1124.48	38.649	1333.59	1267.51	66.079	1422.62	1359.95	62.667	2025.42	1372.72	652.695	1461.12	1290.2	170.917	1272.1	1172.12
1255.35	1239.56	15.798	1899.04	1367.88	531.158	1397.29	1228.88	168.407	1643.35	1268.66	374.687	1727.92	1303.99	423.931	1362.61	1290.28	72.339	1457.82	1353.71	104.109	1445.72	1382.17	63.549	1414.19	1267.31	146.884	1279.37	1240.87	38.506	1428.46	1121.89	306.566	1162.15	1123.49	38.663	1335.9	1264.46	71.441	1416.88	1359.24	57.642	2150.43	1366.94	783.491	1540.28	1288.64	251.638	1272.86	1172.98
1254.7	1248.6	6.108	1841.34	1367.36	473.977	1397.94	1228.48	169.464	1615	1268.43	346.566	1808.13	1304.74	503.396	1358.07	1295.17	62.893	1463.92	1343.26	120.666	1440.52	1375.42	65.1	1430.81	1274.6	156.217	1302.52	1239.12	63.405	1434.15	1120.88	313.28	1155.58	1120.9	34.677	1336.3	1269.04	67.265	1431.44	1360.8	70.636	2163.25	1365.17	798.084	1498.11	1290.56	207.554	1252.26	1173.25
1251.41	1245.39	6.016	1908.12	1372.36	535.757	1407.57	1226.84	180.729	1581.55	1268.91	312.641	1793.15	1305.65	487.5	1372.63	1291.3	81.328	1440.22	1349.68	90.543	1446.01	1375.3	70.708	1432.08	1278.64	153.438	1277.02	1239.89	37.133	1427.15	1122.38	304.771	1172.05	1126.36	45.687	1333.59	1265.26	68.325	1416.23	1359.49	56.747	2032.69	1363.66	669.033	1503.49	1287.71	215.785	1270.18	1174.24
1268.28	1251.04	17.239	1900.83	1365.11	535.721	1418.2	1226.2	192.005	1602.31	1269.33	332.982	1756.54	1305.82	450.72	1357.41	1297.75	59.663	1449.43	1351.4	98.024	1443.08	1376.21	66.868	1430.08	1279.74	150.342	1291.13	1240.01	51.125	1397.28	1123.85	273.437	1183.94	1127.69	56.25	1335.11	1264.55	70.567	1420.25	1355.86	64.388	2096.94	1367.34	729.599	1493.13	1293.29	199.841	1249.04	1167.45
1265.21	1253.47	11.748	1875.68	1367.73	507.953	1423.47	1228.32	195.151	1575.11	1268.9	306.212	1790.93	1302.62	488.312	1365.7	1297.39	68.303	1451.07	1346.93	104.143	1460.91	1380.28	80.625	1431.06	1276.53	154.533	1294.31	1237.04	57.271	1386.3	1112.47	273.835	1177.85	1126.29	51.564	1334.97	1263.46	71.513	1428.3	1360.97	67.321	2034.91	1364.33	670.576	1451.88	1287.69	164.188	1241.86	1175.82
1257.62	1254.18	3.445	1931.47	1359.6	571.876	1420.71	1221.67	199.037	1564.62	1267.8	296.821	1754.09	1308.89	445.204	1345.94	1294.95	50.989	1442.3	1349.97	92.331	1456.1	1381.08	75.017	1409.18	1275.09	134.095	1284.67	1249.11	35.559	1372.15	1118.06	254.098	1170.9	1127.97	42.928	1333.91	1266.49	67.417	1432.19	1357.69	74.509	2105.98	1366.13	739.851	1479.14	1294.96	184.182	1203.33	1164.68
1288.28	1249.07	39.209	1842.87	1365.73	477.144	1423.23	1224.16	199.064	1544.17	1267.07	277.098	1747.46	1302.44	445.018	1359.89	1292.52	67.365	1449.59	1348.91	100.685	1457.27	1383.73	73.539	1421.17	1275.54	145.629	1279.46	1235.12	44.343	1371.55	1117.76	253.79	1175.37	1131.97	43.4	1322.93	1269.35	53.575	1432.98	1360.4	72.585	2108.81	1365.08	743.727	1476.06	1288.31	187.745	1235.79	1178.06
1270.11	1256.6	13.518	1857.12	1376.01	481.112	1428.15	1227.08	201.068	1558.01	1263.35	294.659	1715.98	1299.95	416.029	1357.97	1290.78	67.191	1442.14	1342.12	100.018	1440.94	1380.66	60.277	1431.99	1274.5	157.488	1282.72	1236.64	46.081	1316.15	1117.1	199.05	1187.44	1124.44	62.995	1336.18	1268.21	67.966	1437.87	1346.95	90.923	1967.45	1351.31	616.136	1512.17	1294.76	217.412	1206.74	1169.8
1279.05	1260.82	18.234	1883.07	1364.6	518.462	1417.66	1228.85	188.809	1553.78	1265.59	288.194	1721.64	1302.2	419.446	1339.19	1290.69	48.495	1448.87	1343.97	104.899	1448.5	1377.17	71.329	1425.87	1278.67	147.19	1276.5	1243.6	32.903	1324.23	1120.81	203.415	1186.58	1124.28	62.297	1333.47	1261.16	72.304	1433.68	1352.18	81.493	1976.31	1356.35	619.969	1453.24	1287.33	165.911	1216.47	1174.6
1268.5	1259	9.504	1811.59	1365.99	445.599	1426.89	1223.85	203.048	1564.67	1266.49	298.184	1691.2	1295.05	396.151	1348.97	1287.29	61.687	1457.24	1336.96	120.274	1461.16	1380.43	80.739	1409.32	1266.93	142.386	1275.82	1240.13	35.694	1317.88	1121.38	196.49	1196.59	1126.39	70.2	1330.84	1262.42	68.426	1471.12	1361.39	109.732	1921.6	1367.96	553.641	1496.31	1291.65	204.658	1220.13	1168.31
1276.6	1256.45	20.153	1829.38	1365.55	463.831	1424.15	1227.94	196.212	1575.65	1266.97	308.678	1687.74	1303.82	383.919	1339.45	1292.61	46.837	1454.61	1336.52	118.096	1453.36	1374.97	78.387	1404.53	1276.66	127.87	1284.91	1244.01	40.907	1291.56	1115.58	175.979	1156.21	1125.84	30.371	1323.72	1260.7	63.023	1458.68	1360.72	97.966	1993.37	1364.63	628.736	1519.85	1288.91	230.945	1209.48	1167.36
1276.46	1258.12	18.337	1762.18	1363.93	398.254	1402.92	1219.87	183.052	1586.94	1262.51	324.432	1677.04	1299.12	377.925	1327.62	1294.23	33.391	1453.41	1333.79	119.612	1447.96	1378.24	69.722	1403.8	1275.52	128.283	1275.54	1238.57	36.963	1273.17	1116.31	156.858	1182.24	1125.22	57.021	1323.58	1268.34	55.245	1530.7	1355.39	175.309	2068.18	1373.26	694.922	1515.31	1288.58	226.728	1197.18	1171.35
1285.77	1262.68	23.091	1791.7	1365.91	425.794	1399.39	1222.54	176.855	1596.13	1269.94	326.187	1673.79	1298.98	374.809	1320.19	1289.42	30.771	1476.06	1338.61	137.449	1455.01	1375.28	79.726	1383.39	1282.52	100.874	1275.07	1241.99	33.079	1273.3	1113.16	160.138	1165.78	1124.44	41.333	1325.43	1270.74	54.692	1531.34	1358.75	172.598	1808.13	1363.03	445.1	1482.48	1290.07	192.417	1189.28	1170.87
1306.43	1260.68	45.751	1800.14	1363.83	436.315	1405.04	1222.67	182.371	1689.87	1269.63	420.243	1624.66	1304.11	320.557	1323.73	1293.04	30.692	1474	1329.45	144.551	1428.09	1370.59	57.502	1393.43	1269.52	123.91	1293.66	1233.69	59.972	1272.63	1115.86	156.777	1170.06	1118.27	51.785	1332.61	1267.23	65.377	1607.57	1361.92	245.649	1825.38	1362.84	462.539	1508.41	1292.17	216.239	1189.39	1165.38
1300.75	1262.31	38.437	1804.62	1360.63	443.992	1389.16	1222.41	166.744	1738.55	1260.42	478.127	1635.74	1296.46	339.287	1323.98	1290.25	33.725	1486.13	1337.18	148.958	1447.65	1378.34	69.307	1383.19	1273.05	110.139	1281.05	1244.79	36.259	1269	1115.89	153.109	1166.59	1124.53	42.052	1322.29	1264.14	58.15	1634.04	1358.91	275.131	1948.84	1366.31	582.531	1523.72	1287.81	235.905	1196.67	1172.66
1289.41	1256.17	33.241	1773.88	1360.95	412.924	1363.99	1218.58	145.413	1894.37	1265.66	628.705	1618.07	1298.48	319.594	1321.36	1285.13	36.226	1493.04	1340.71	152.327	1433.31	1376.87	56.441	1360.78	1278.47	82.306	1286.58	1231.86	54.723	1287.05	1122.71	164.336	1175.51	1117.54	57.968	1321.08	1258.56	62.514	1650.19	1357.66	292.531	1824.56	1364.81	459.741	1516.96	1296.49	220.464	1170.23	1172.98
1298.23	1262.82	35.407	1682.07	1358.62	323.45	1376.58	1219.89	156.686	1984.79	1273.55	711.233	1569.19	1306.49	262.696	1335.88	1291.04	44.845	1501.11	1335.79	165.318	1437.54	1369.73	67.805	1341.72	1280.29	61.431	1292.47	1236.19	56.276	1313.9	1122.94	190.953	1155.52	1121.62	33.89	1324.12	1264.36	59.757	1644.93	1361.11	283.823	1860.39	1364.98	495.413	1543.73	1288.46	255.273	1175.79	1177.3
1310.71	1261.77	48.945	1720.44	1356.74	363.7	1370.99	1219.36	151.63	2166.83	1262.52	904.312	1581.15	1300.11	281.04	1332.46	1288.06	44.4	1504.56	1335.34	169.219	1451.94	1379.35	72.591	1344.09	1274.59	69.499	1295.96	1244.65	51.305	1350.48	1115.04	235.437	1180.25	1118.54	61.716	1318.92	1264.07	54.844	1677.47	1357.76	319.703	1847.78	1363.24	484.534	1478.61	1287.01	191.607	1176.95	1171.56
1313.94	1267.68	46.267	1667.45	1360.92	306.532	1350.61	1219.23	131.382	2308.43	1262.74	1045.69	1567.96	1303.07	264.892	1326.11	1295.11	31.005	1485.09	1339.3	145.788	1443.52	1369.83	73.688	1344.07	1277.08	66.994	1291.67	1235.87	55.799	1376.97	1115.44	261.537	1159.52	1123.81	35.708	1323.84	1265.11	58.736	1673.83	1360.53	313.3	1860.37	1364.08	496.291	1445.66	1290.85	154.811	1186.4	1176.67
1309.13	1262.28	46.853	1657.44	1362.97	294.467	1348.32	1220.32	128.001	2409.54	1266.56	1142.98	1560.14	1292.64	267.495	1322.05	1287.58	34.468	1493.8	1337.78	156.023	1434.47	1369.84	64.632	1334.67	1275.32	59.343	1291.02	1232.16	58.854	1450.31	1122.72	327.587	1166.53	1124.51	42.025	1329.75	1258.71	71.039	1684.73	1360.16	324.564	1942.92	1365.88	577.041	1498	1291.03	206.971	1181.98	1169.52
1320.66	1256.83	63.832	1638.11	1359.56	278.545	1335.79	1225.29	110.503	2479.12	1264.52	1214.6	1552.73	1300.6	252.132	1327.77	1293.91	33.867	1490.91	1331.41	159.502	1434.92	1373.25	61.672	1319.3	1271.35	47.953	1297.83	1236.62	61.21	1508.74	1116.3	392.439	1160.98	1118.44	42.535	1323.54	1259.53	64.008	1704.97	1356.18	348.788	1968.76	1364.14	604.621	1470.3	1287.04	183.256	1185.05	1166.94
1324.44	1259.64	64.801	1607.18	1359.12	248.063	1319.84	1222.42	97.419	2684.47	1267.92	1416.55	1582.01	1300.77	281.239	1337.76	1300.74	37.02	1506.21	1332.8	173.405	1442.66	1378.34	64.327	1316.67	1271.54	45.132	1301.17	1240.76	60.41	1564.8	1118.98	445.813	1158.4	1131.25	27.152	1335.18	1268.06	67.115	1681.99	1360.55	321.445	1852.53	1362.48	490.053	1477.69	1293.06	184.628	1187.74	1170.28
1332.93	1264.25	68.684	1681.43	1360.81	320.626	1317.51	1230.27	87.24	2730.62	1269.8	1460.82	1614.83	1306.54	308.289	1359.65	1291.17	68.486	1498.69	1337.24	161.443	1446.65	1374.41	72.249	1312.15	1268.87	43.283	1305.6	1237	68.598	1625	1122.22	502.773	1144.45	1122.05	22.394	1333.86	1255.73	78.129	1683.96	1353.39	330.572	1870.99	1362.18	508.814	1428.41	1289.47	138.939	1203.24	1166.76
1316.61	1260.24	56.369	1662.79	1368.73	294.065	1327.87	1228.55	99.323	2787.07	1259.79	1527.28	1645.18	1303.64	341.541	1347.32	1290.65	56.663	1494.2	1339.47	154.731	1441.19	1376.7	64.489	1311.12	1276.61	34.504	1318.09	1235.08	83.009	1660.81	1123.17	537.643	1128.57	1126.2	2.368	1339.82	1260.94	78.877	1684.58	1361.63	322.947	1864.59	1358.53	506.064	1452.25	1292.52	159.729	1223.29	1177.22
1326.3	1261.27	65.037	1731.89	1355.46	376.43	1324.72	1222.31	102.417	2879.75	1269.11	1610.63	1658.15	1293.18	364.966	1366.82	1286.7	80.123	1500.9	1335.52	165.381	1450.02	1373.71	76.307	1316.58	1277.87	38.712	1322.59	1240.35	82.242	1751.59	1116.23	635.359	1127.44	1127.21	0.229	1341.28	1264.19	77.098	1678.64	1364.37	314.276	1826.17	1369.94	456.234	1492.32	1294.71	197.616	1245.73	1172.24
1322.02	1268.64	53.372	1757.75	1358.42	399.326	1311.33	1217.81	93.519	3024.39	1268.24	1756.15	1738.36	1300.03	438.332	1392.5	1292.13	100.368	1482.9	1346.1	136.802	1454.66	1380.17	74.49	1313.02	1278.24	34.782	1322.74	1235.03	87.708	1771.86	1116.85	655.008	1136.45	1130.54	5.915	1338.96	1262.81	76.148	1669.55	1362.3	307.251	1810.71	1365.94	444.77	1499.4	1287.19	212.204	1248.24	1172.93
1315.43	1267.53	47.902	1784.52	1365.57	418.946	1311.87	1225.32	86.547	3049.36	1270.81	1778.55	1772.71	1301.76	470.951	1387.07	1298.86	88.215	1500.52	1340.61	159.908	1442.89	1380.12	62.767	1327.14	1273.51	53.634	1320.85	1237.46	83.388	1830.75	1118.12	712.632	1139.24	1128.2	11.041	1344.32	1262.75	81.569	1675	1357.74	317.253	1824.22	1366.56	457.661	1522.77	1294.34	228.43	1246.12	1175.51
1316.76	1262.27	54.482	1802.03	1362.72	439.31	1320.33	1226.6	93.735	3036.97	1270.2	1766.77	1842.73	1300.27	542.46	1395.95	1286.6	109.351	1481.94	1342.47	139.474	1445.36	1380.01	65.352	1326.94	1281.78	45.167	1327.61	1239.01	88.602	1836.66	1112.42	724.235	1143.3	1125.39	17.903	1343.03	1267.16	75.863	1649.32	1356.05	293.27	1911.86	1370.1	541.762	1490.61	1288.1	202.515	1265.16	1168.69
1311.82	1262.05	49.767	1799.15	1365.26	433.891	1320.17	1221.35	98.823	3144.6	1267.14	1877.46	1891.53	1304.05	587.483	1401.99	1294.29	107.696	1491.77	1334.43	157.344	1448.36	1375.36	73.001	1321.07	1274.53	46.534	1322	1238.13	83.869	1857.49	1109.09	748.401	1142.4	1128.25	14.143	1338.56	1265.6	72.966	1629.18	1358	271.18	1835.21	1358.29	476.924	1530.05	1289.67	240.377	1260.21	1177.54
1304.26	1270	34.267	1849.06	1364.24	484.82	1334.58	1222.75	111.832	3148.82	1267.26	1881.57	1918.04	1301.74	616.297	1418.58	1277.11	141.477	1478.77	1333.12	145.648	1441.3	1374.16	67.141	1318.85	1268.78	50.075	1317.76	1240.96	76.797	1852.62	1121.3	731.32	1142.38	1128.66	13.711	1343.33	1264.61	78.719	1626.63	1361.47	265.168	1896.82	1366.93	529.889	1483.52	1293.57	189.95	1263.62	1173
1292.64	1262.02	30.621	1867.97	1362.96	505.01	1334.68	1223.49	111.186	2981.94	1268.45	1713.49	1966.65	1298.9	667.745	1429.19	1291.5	137.687	1470.87	1332.96	137.914	1445.85	1378.36	67.497	1325.92	1279.05	46.874	1329.77	1236.87	92.895	1849.47	1115.83	733.64	1151.47	1127.97	23.506	1341.37	1270.44	70.925	1608.14	1362.12	246.021	1907.29	1363.97	543.319	1424.24	1288.77	135.469	1284.74	1169.22
1290.29	1263.18	27.107	1983.22	1358.37	624.852	1348.21	1223.36	124.85	3045.12	1268.02	1777.1	2057.5	1302.96	754.539	1422.94	1290.18	132.754	1489.14	1335.52	153.618	1440.81	1379.97	60.841	1317.5	1272.08	45.417	1321.11	1234.18	86.926	1864.48	1120.75	743.723	1137.74	1127.53	10.211	1339.58	1257.66	81.915	1580.69	1357.6	223.086	1854.03	1360.89	493.143	1450.58	1285.46	165.114	1287.31	1170.53
1296.83	1263.94	32.893	1998.11	1363.87	634.247	1373.34	1229.56	143.78	2937.98	1270.07	1667.91	2080.89	1292.3	788.594	1406.51	1289.88	116.625	1482.5	1334.84	147.664	1459.99	1369.38	90.608	1325.99	1281.47	44.522	1316.55	1232.75	83.797	1840.75	1115.06	725.689	1149.82	1125.76	24.054	1349.26	1267.21	82.048	1554.58	1360.2	194.375	1932.83	1356.65	576.176	1485.25	1292.25	193.002	1275.64	1176.15
1294.45	1263.26	31.195	1979.61	1364.22	615.393	1393.28	1217.11	176.177	2871.5	1267.03	1604.46	2077.67	1304.26	773.415	1410.14	1292.93	117.219	1492.44	1334.96	157.477	1460.29	1374.33	85.958	1316.34	1273.04	43.296	1311.18	1237.84	73.339	1813.05	1115.47	697.573	1151.36	1124.78	26.574	1346.94	1269.8	77.146	1553.17	1354.31	198.859	1962.96	1366.36	596.603	1476.71	1288.4	188.317	1245.87	1171.05
1314.56	1286.45	28.11	2009.29	1382.45	626.837	1426.99	1241.83	185.162	2743.12	1292.53	1450.59	2112	1324.05	787.951	1428.27	1305.27	123.001	1527.89	1355.3	172.59	1468.04	1398.08	69.953	1291.45	1305.2	-13.755	1338.33	1256.07	82.259	1847.64	1139.86	707.785	1193.24	1144.27	48.969	1371.88	1284.98	86.903	1568	1378.62	189.381	1978.36	1389.53	588.834	1535.1	1313.77	221.337	1257.83	1192.02
1312.99	1279.85	33.141	2037.78	1385.69	652.088	1452.77	1240.62	212.146	2641.41	1283.53	1357.88	2130.37	1327.69	802.678	1419.71	1301.9	117.807	1537.19	1357.42	179.772	1483.07	1391.4	91.673	1284.58	1294.24	-9.66	1321.31	1257.83	63.489	1813.63	1133.27	680.362	1202.69	1141.75	60.938	1358.69	1273.43	85.261	1532.31	1376.37	155.949	1941.75	1384.34	557.413	1520.98	1314.06	206.919	1247.05	1193.91
1308.65	1285.61	23.037	2092.65	1375.75	716.9	1483.12	1238.72	244.4	2782.42	1280.2	1502.22	2122.63	1326.17	796.458	1409.38	1302.78	106.597	1558.57	1354.73	203.839	1466.86	1385.92	80.938	1306.43	1297.69	8.737	1322.27	1245.55	76.718	1782.46	1137.68	644.775	1184.65	1135.79	48.865	1357.23	1278.93	78.303	1520.02	1372.12	147.893	1960.27	1392.5	567.77	1540.85	1309.29	231.56	1226.82	1186.29
1286.21	1261.22	24.99	2009.53	1363.68	645.852	1482.87	1223.1	259.772	2688.31	1261.85	1426.47	2100.29	1305.85	794.441	1383.81	1290.93	92.875	1549.05	1339.93	209.118	1454.05	1369.03	85.028	1298.16	1272.17	25.988	1305.84	1235.87	69.973	1741.19	1119.31	621.887	1179.69	1127.41	52.28	1338.32	1259.52	78.803	1511.51	1363.26	148.248	1878.2	1364.65	513.551	1518.63	1284.84	233.793	1230.19	1176.71
1296.6	1261.84	34.76	2053.93	1361.82	692.103	1495.32	1220.2	275.113	2751.57	1264.92	1486.65	2089.52	1304.76	784.766	1378.84	1289	89.833	1592.3	1336.26	256.041	1464.68	1375.76	88.919	1296.94	1276.04	20.905	1298.79	1232.96	65.829	1691.93	1120.07	571.859	1211.62	1132.71	78.907	1328.85	1266.48	62.371	1496.55	1359.26	137.285	1937.99	1364.85	573.145	1507.03	1284.85	222.18	1216.71	1172.19
1306.93	1266.64	40.289	2060.24	1364.71	695.529	1511.38	1216.56	294.819	2639.43	1269.78	1369.65	2117.8	1308.59	809.215	1346.07	1293.76	52.309	1589.91	1335.18	254.735	1463.12	1369.61	93.512	1307.91	1276.12	31.789	1289.86	1231.96	57.898	1697.11	1119.53	577.58	1186.03	1126.76	59.272	1334.29	1267.89	66.397	1505.19	1355.78	149.407	1952.03	1371.39	580.639	1483.11	1292.85	190.262	1223.99	1175.07
1315.14	1260.47	54.668	1974.09	1366.6	607.492	1512.03	1223.63	288.404	2644.32	1261.04	1383.29	2025.97	1303.31	722.659	1334.16	1290.51	43.651	1590.65	1329.96	260.694	1454.6	1385.06	69.54	1306.11	1274.93	31.178	1282.59	1232.53	50.061	1666.52	1112.91	553.616	1225.08	1130.16	94.927	1337.21	1264.87	72.343	1491.54	1354.66	136.883	1943.59	1359.24	584.347	1516.82	1299.41	217.407	1246.17	1176.85
1305.91	1260.24	45.676	1963.12	1362.38	600.742	1526.7	1223.11	303.591	2486.03	1272.58	1213.45	2024.45	1300.89	723.558	1324.03	1287.16	36.869	1608.72	1336.12	272.597	1454.45	1375.07	79.373	1299.31	1278.74	20.57	1285.35	1236.19	49.166	1619.84	1115.85	503.985	1223.76	1127.13	96.625	1311.15	1263.58	47.568	1482.5	1354.56	127.948	1951.69	1367.05	584.642	1506.07	1287.12	218.942	1229.46	1164.45
1336.2	1266.82	69.381	1942.26	1362.12	580.143	1516.64	1225.43	291.213	2465.07	1268.04	1197.03	2040.49	1303.33	737.169	1330.35	1294.06	36.295	1632.45	1333.06	299.393	1460.43	1379.09	81.343	1315.71	1276.47	39.245	1289.65	1242.03	47.628	1603.25	1117.69	485.558	1243.7	1120.15	123.549	1327.99	1264.41	63.584	1488.83	1359.67	129.157	1895.96	1367.75	528.213	1501.82	1299.98	201.842	1232.17	1173.58
1360.35	1266.02	94.33	1965.15	1362.59	602.562	1519.3	1219.34	299.959	2500.53	1267.16	1233.37	2012.08	1306.89	705.191	1333.06	1284.28	48.779	1627.67	1333.18	294.493	1471.71	1375.94	95.769	1315.64	1274.22	41.411	1291.45	1240.57	50.873	1584.88	1122.3	462.582	1219.21	1124.28	94.934	1328.33	1271.45	56.888	1508.49	1360.6	147.894	1956.1	1369.71	586.386	1543.42	1299.31	244.11	1234.55	1175.23
1389.44	1264.59	124.848	1958.4	1368.15	590.248	1506.72	1221.45	285.266	2329.06	1267.25	1061.81	1950.43	1304.68	645.757	1319.49	1296.05	23.441	1608.11	1334.97	273.134	1471.44	1376.4	95.042	1316.54	1283.61	32.933	1278.9	1237.96	40.941	1532.33	1111.78	420.553	1217.38	1125.09	92.298	1323.53	1270.56	52.971	1513.19	1353.15	160.042	1890.37	1361.7	528.666	1489.69	1295.4	194.288	1217.89	1171.79
1388.68	1263.22	125.459	1850.27	1363.5	486.766	1509.94	1225.62	284.314	2218.95	1264	954.944	1928.77	1303.65	625.118	1314.11	1289.4	24.708	1610.67	1330.52	280.15	1468.12	1379.18	88.937	1318.45	1268.83	49.62	1284.46	1235.89	48.567	1506.01	1110.4	395.609	1220.51	1126.58	93.933	1319.26	1272.02	47.244	1542.29	1366.73	175.561	1898.74	1366.67	532.074	1487.71	1300.78	186.938	1203.33	1168.44
1429.21	1266.07	163.135	1924.01	1362.19	561.818	1483.94	1218.54	265.403	2302.97	1260.12	1042.85	1880.29	1309.29	571.005	1309.94	1292.12	17.82	1623.89	1335.32	288.573	1461.23	1374.97	86.256	1323.97	1266.73	57.238	1277.24	1236.52	40.728	1495.22	1117.32	377.903	1235.18	1124.72	110.455	1313.06	1263.54	49.515	1559.3	1363.38	195.92	1832.3	1368.12	464.179	1494.74	1294.09	200.654	1193.78	1176.89
1438.47	1268.57	169.899	1858.7	1360.41	498.287	1495.37	1218.27	277.104	2192.28	1271.03	921.246	1871.59	1302.69	568.905	1310.47	1288.86	21.603	1631.15	1327.59	303.554	1468.49	1377.42	91.07	1327.96	1275.27	52.688	1287.63	1233.67	53.965	1480.41	1112.92	367.489	1229.86	1130.17	99.689	1325.29	1261.14	64.151	1586.28	1362.63	223.646	1822.9	1357.83	465.075	1479.14	1293.69	185.449	1193.44	1176.24
1480.86	1267.93	212.924	1811.92	1359.39	452.53	1470.79	1226.01	244.775	2146.98	1268.23	878.744	1859.17	1302.61	556.564	1312.65	1291.45	21.201	1632.42	1337.87	294.552	1473.22	1378.23	94.992	1342.9	1282.47	60.439	1287.11	1245.12	41.994	1450.74	1120.33	330.406	1207.53	1124.63	82.9	1324.37	1265.54	58.833	1618.52	1359.09	259.424	1864.56	1369.43	495.13	1492.21	1295.67	196.548	1172.2	1175.58
1488.17	1269.18	218.984	1779.42	1369.61	409.811	1459.4	1220.09	239.311	2049.71	1273.78	775.936	1827.63	1302.68	524.949	1307.5	1293.96	13.539	1613.54	1335.54	278.008	1464.54	1378.78	85.758	1346.33	1274.03	72.299	1290.91	1232.69	58.217	1428.54	1114.11	314.426	1219.05	1129.27	89.776	1328.84	1264.69	64.149	1663.47	1358.23	305.243	1858.7	1364.55	494.151	1486.94	1295.18	191.764	1187.67	1176.15
1503.72	1265.94	237.787	1786.27	1369.47	416.8	1448.78	1221.26	227.517	2029.45	1269.8	759.648	1806.77	1301.12	505.645	1304.15	1296.79	7.365	1617.1	1331.64	285.46	1467.65	1374.47	93.18	1358.43	1274.82	83.608	1287.2	1236.85	50.347	1426.82	1114.91	311.909	1196.58	1121.23	75.354	1319.13	1256.24	62.893	1717.1	1363.17	353.93	1904.78	1366.28	538.506	1485.1	1306.62	178.482	1184.93	1166.3
1509.7	1269.99	239.711	1715.1	1360.67	354.43	1428.03	1224.25	203.779	1907.13	1273.57	633.557	1743.82	1307.06	436.763	1299.41	1294.08	5.33	1602.79	1345.08	257.708	1471.91	1378.07	93.84	1361.74	1269.35	92.385	1298.81	1241.32	57.489	1425.97	1112.7	313.272	1238.96	1124.98	113.978	1330.56	1259.59	70.974	1729.51	1360.31	369.193	1797.36	1367.57	429.789	1488.88	1304.22	184.661	1178.75	1171.01
1532.2	1267.91	264.287	1705.9	1361.47	344.426	1418.59	1224.88	193.709	1893.44	1266.37	627.068	1721.25	1302.21	419.043	1302.62	1288.94	13.679	1597.92	1336.14	261.787	1454.98	1384.52	70.462	1377.34	1279.84	97.503	1301.13	1231.41	69.714	1422.77	1120.78	301.99	1267.68	1129.95	137.736	1329.13	1264.38	64.76	1763.26	1356.27	406.984	1767.07	1367.69	399.374	1468.38	1299.21	169.167	1179.42	1168.63
1557.75	1269.16	288.597	1727.12	1367.01	360.105	1397.59	1228.41	169.182	1900.54	1272.46	628.073	1708.66	1304.75	403.912	1305.19	1291.1	14.086	1577.88	1329.98	247.899	1479.24	1376.85	102.393	1388.05	1283.66	104.392	1311.56	1236.24	75.32	1436.48	1118.92	317.561	1220.99	1129.55	91.446	1337.69	1269.72	67.97	1787.47	1361.44	426.026	1870.57	1368.92	501.653	1479.99	1304.99	174.995	1200.96	1166.66
1506.75	1267.5	239.247	1786.61	1368.25	418.368	1375.19	1220.87	154.325	1838.76	1267	571.762	1695.24	1313.08	382.164	1306.68	1293.51	13.176	1575.77	1338.99	236.771	1476.59	1378.19	98.408	1390.01	1275.81	114.206	1315.29	1239.12	76.169	1459.72	1117.47	342.248	1271.03	1124.34	146.685	1327.02	1260.38	66.64	1819.83	1360.15	459.681	1842.01	1363.59	478.417	1471.58	1304.38	167.197	1183.38	1170.7
1557.63	1265.04	292.588	1728.03	1366	362.031	1368.46	1221.47	146.988	1880.35	1261.93	618.422	1634.37	1296.44	337.933	1316.63	1300.19	16.437	1559.26	1338.24	221.018	1475.2	1379.21	95.987	1384.02	1271.73	112.294	1316.87	1238.64	78.223	1497.01	1115.85	381.167	1243.07	1124.3	118.773	1335.18	1272.51	62.663	1832.48	1356.3	476.177	1828.44	1365.95	462.495	1501.92	1303	198.924	1175.16	1171.89
1525.98	1263.66	262.329	1774.51	1357.99	416.516	1368.35	1220.69	147.659	1877.44	1265.21	612.233	1653.57	1305.09	348.475	1318.36	1289.07	29.296	1559.34	1337.87	221.473	1477.6	1379.66	97.938	1396.78	1276.71	120.072	1331.54	1235.32	96.226	1562.86	1113.97	448.885	1235.01	1123.96	111.057	1341.52	1261.49	80.025	1860.95	1359.73	501.218	1854.59	1362.47	492.12	1488.87	1299.51	189.356	1190.51	1172.15
1515.76	1266.18	249.58	1782.27	1368.06	414.212	1356.98	1225.67	131.309	1904.75	1272.81	631.941	1646.44	1303.56	342.886	1334.99	1302.42	32.567	1524.29	1333.09	191.194	1477.29	1375.29	102.009	1408.08	1278.01	130.069	1340.12	1232.67	107.448	1610.19	1116.41	493.778	1187.56	1125.61	61.947	1341.96	1260.85	81.111	1830.96	1360.94	470.026	1889.55	1367.26	522.294	1491.02	1309.02	182.004	1184.74	1161.2
1524.15	1265	259.152	1838.39	1367.96	470.433	1346.25	1227.17	119.082	1890.44	1267.64	622.8	1686.68	1301.44	385.241	1342.98	1297.79	45.191	1581.57	1333.77	247.8	1476.19	1379.04	97.149	1396.79	1272.95	123.831	1342.79	1241.1	101.687	1706.7	1118.15	588.552	1210.83	1126.45	84.38	1338.48	1260.67	77.809	1848.16	1361.88	486.285	1840.99	1367.31	473.68	1467	1303.44	163.558	1166.35	1170.86
1482.76	1269.53	213.229	1901.5	1362.03	539.462	1343.45	1226.09	117.355	1842.46	1264.67	577.792	1665.95	1310.1	355.855	1355.22	1295.96	59.259	1595.49	1329.67	265.816	1517.97	1378.87	139.1	1403.79	1274.78	129.015	1340.12	1245.08	95.034	1771.19	1117.73	653.457	1183.11	1124.83	58.28	1335.45	1260.74	74.704	1866.79	1359.52	507.262	1886.7	1370.15	516.55	1496.99	1310.7	186.294	1174.95	1159.38
1493.59	1268.65	224.943	1897.44	1361.2	536.243	1361.52	1225.25	136.272	1862.21	1267.84	594.375	1680.94	1304.96	375.971	1359.73	1292.68	67.05	1606.02	1341.29	264.729	1528.94	1383.99	144.951	1400.78	1280.82	119.968	1340.47	1235.93	104.541	1862.28	1114.02	748.254	1193.28	1127.35	65.929	1335.04	1265.23	69.812	1815.12	1358.15	456.971	1884	1370.24	513.762	1504.6	1308	196.596	1199.84	1169.56
1455.89	1270.78	185.104	1954.68	1361.58	593.097	1364.77	1224.48	140.293	1910.57	1266.84	643.731	1724.63	1295.81	428.82	1368.69	1298.95	69.742	1645.39	1341.79	303.606	1541.05	1376.49	164.557	1383.29	1274.29	108.991	1345.85	1243.77	102.089	1939.34	1111.93	827.408	1156.2	1123.24	32.959	1336.73	1257.95	78.781	1808.93	1358.82	450.109	1949.12	1362.8	586.329	1509.02	1304.22	204.795	1214.02	1169.61
1445.93	1265.79	180.14	2028.43	1364.27	664.166	1366.51	1219.98	146.523	1925.18	1265.18	660	1791.08	1304.57	486.507	1388.13	1297.72	90.406	1662.09	1334.11	327.976	1547.39	1376.01	171.38	1372.61	1279.67	92.94	1337.15	1237.99	99.164	1979.78	1107.02	872.756	1197.96	1125.04	72.918	1342.42	1265.93	76.492	1800.9	1358.75	442.15	2008.44	1366.52	641.923	1490.34	1305.02	185.32	1226.39	1172.68
1406.87	1273.87	132.999	2132.12	1364.83	767.284	1383.23	1225.11	158.128	1941.44	1267.51	673.932	1851.44	1310.3	541.136	1390.39	1293.74	96.652	1693.42	1339.09	354.331	1592.57	1386.85	205.723	1382.91	1276.54	106.376	1358.91	1237.02	121.884	2027.46	1115.35	912.116	1204.22	1121.85	82.365	1337.82	1261.49	76.33	1785.29	1361.52	423.771	1946.37	1366.38	579.983	1513.69	1309.18	204.506	1230.1	1163.08
1391.7	1269.6	122.1	2200.47	1371.61	828.868	1424.26	1219.84	204.42	1921.59	1269.36	652.229	1905.77	1298.9	606.871	1399.83	1300.39	99.437	1750.63	1332.89	417.741	1597.96	1376.79	221.165	1380.92	1276.9	104.016	1348.03	1233.83	114.2	2114.33	1119.44	994.891	1170.71	1125.37	45.346	1347.63	1264.72	82.912	1754.97	1362.18	392.782	1971.76	1369.24	602.519	1499.62	1311.57	188.05	1275.99	1169.68
1389.87	1266.87	122.993	2183.39	1368.02	815.375	1460.04	1228.68	231.358	1980.75	1268.1	712.649	1941.1	1302.19	638.908	1396.48	1292.6	103.878	1783.53	1331.74	451.79	1613.43	1383.18	230.248	1363.26	1280.33	82.936	1349.7	1235.68	114.017	2164.73	1109.13	1055.6	1178.18	1123.47	54.713	1355.61	1266.02	89.586	1742.36	1363.37	378.99	1931.28	1368.26	563.017	1499.89	1316.16	183.728	1285.12	1167.42
1347.22	1264.14	83.074	2130	1362.87	767.133	1491.43	1223.58	267.855	1983.59	1265.75	717.839	1954.82	1299.32	655.504	1402.55	1292.34	110.214	1843.14	1341.43	501.71	1596.14	1377.91	218.23	1355.53	1276.32	79.207	1356.72	1232.78	123.944	2174.06	1108.24	1065.82	1171.22	1120.27	50.956	1336.04	1267.43	68.602	1739.81	1367.34	372.476	1897.22	1363.68	533.546	1521.55	1311.39	210.156	1309.64	1166.4
1362.11	1264.17	97.94	2253.75	1354.27	899.482	1531.1	1221.24	309.852	2015.93	1266.2	749.725	2036.21	1297.57	738.644	1408	1296.94	111.056	1880.45	1344.94	535.505	1651.64	1381.49	270.152	1347.55	1281.68	65.864	1342.1	1239.83	102.271	2210.9	1117.48	1093.43	1155.13	1127.58	27.548	1341.07	1264.67	76.403	1706.86	1357.35	349.51	1950.9	1367.78	583.124	1555.97	1313.93	242.044	1272.43	1159.69
1370.47	1267.31	103.161	2357.5	1365.74	991.756	1554.26	1227.14	327.114	2039.99	1265.59	774.403	2100.34	1312.11	788.228	1414.89	1296.99	117.896	1912.99	1342.14	570.847	1631.3	1377.19	254.104	1333.37	1274.49	58.876	1338.93	1243.01	95.924	2252.79	1114.75	1138.03	1205.03	1128.5	76.53	1339.49	1259.28	80.209	1701.65	1359.65	341.997	1966.27	1361.38	604.881	1587.56	1307.8	279.762	1377.98	1154.88
1338.9	1269.41	69.493	2432.13	1360.12	1072.01	1590.83	1229.12	361.71	2040.57	1267.72	772.851	2102.33	1300.78	801.551	1407.29	1290.9	116.385	1899.41	1335.38	564.027	1636.37	1383.87	252.508	1337.02	1280.54	56.481	1339.42	1235.29	104.136	2241.06	1118.01	1123.05	1171.77	1130.57	41.195	1344.96	1265.6	79.363	1685.27	1360.66	324.607	1976.24	1364.5	611.737	1592.15	1310.26	281.896	1414.18	1155.85
[truncated: 181 more rows]
[truncated: 40 more columns]
