# Supplementary figures and images for: Persistence, period and precision of autonomous cellular oscillators from the zebrafish segmentation clock
Source: eLife journal article supplement (doi:10.7554/elife.08438), 2016-02-13

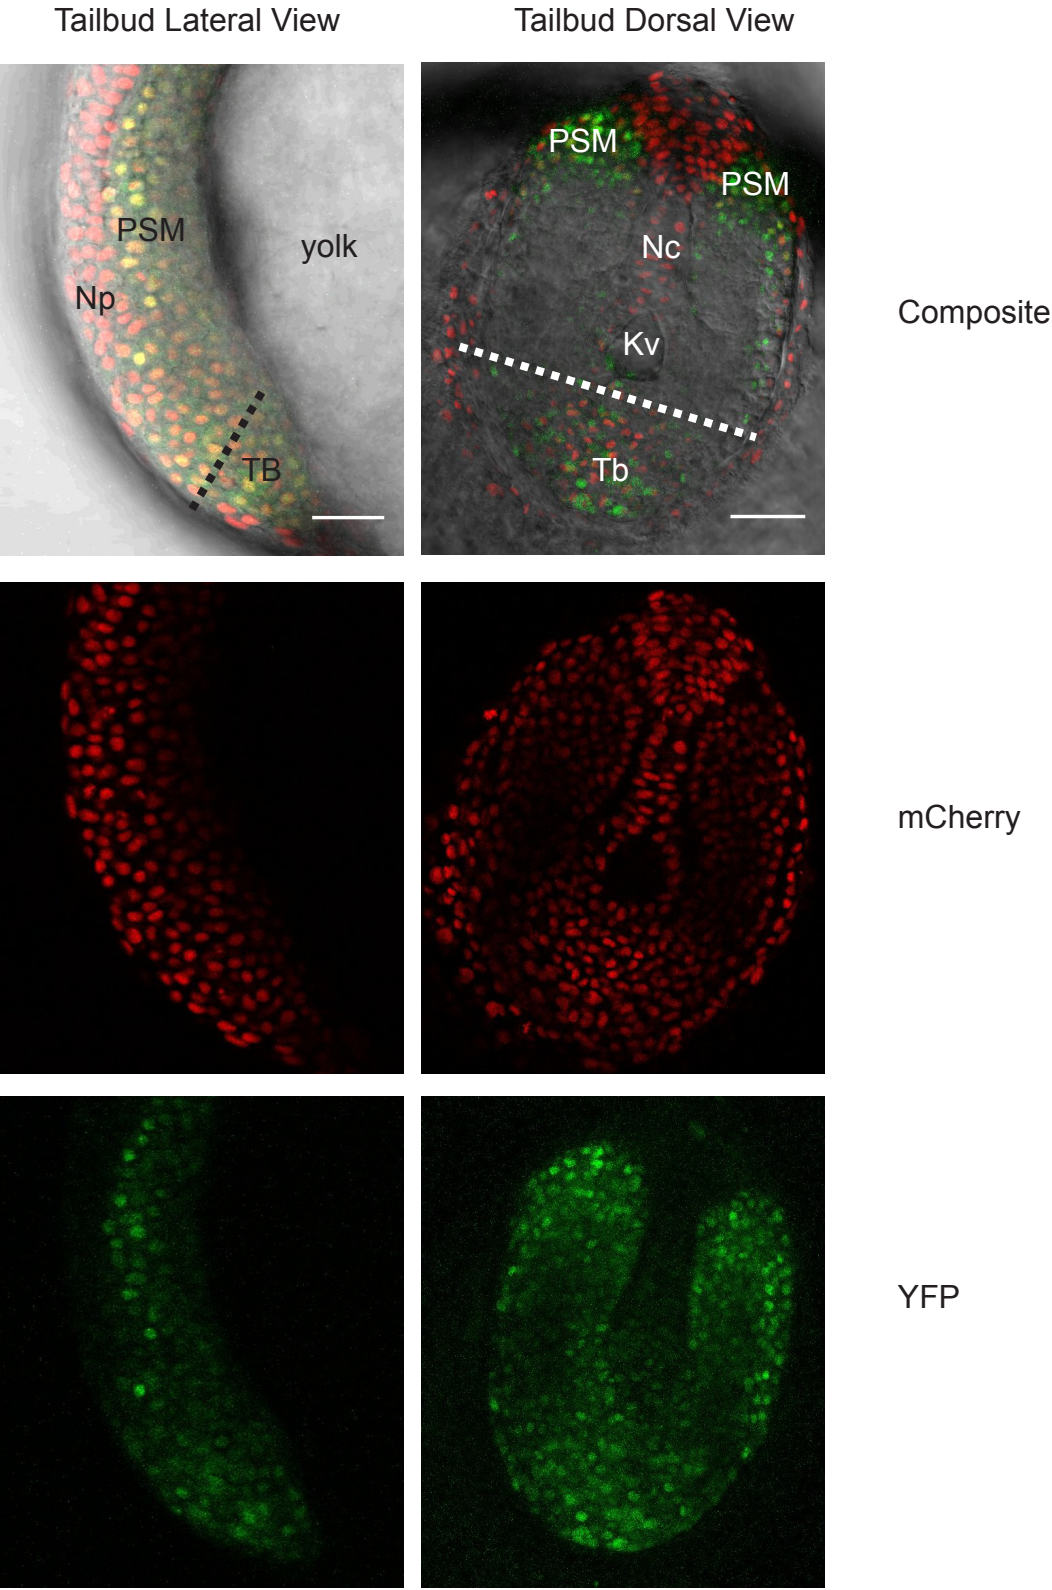

Supplement: supp [file elife_poa_e08438_Figure_1_figure_supplement_1.pdf › elife_poa_e08438_Figure_1_figure_supplement_1.pdf]

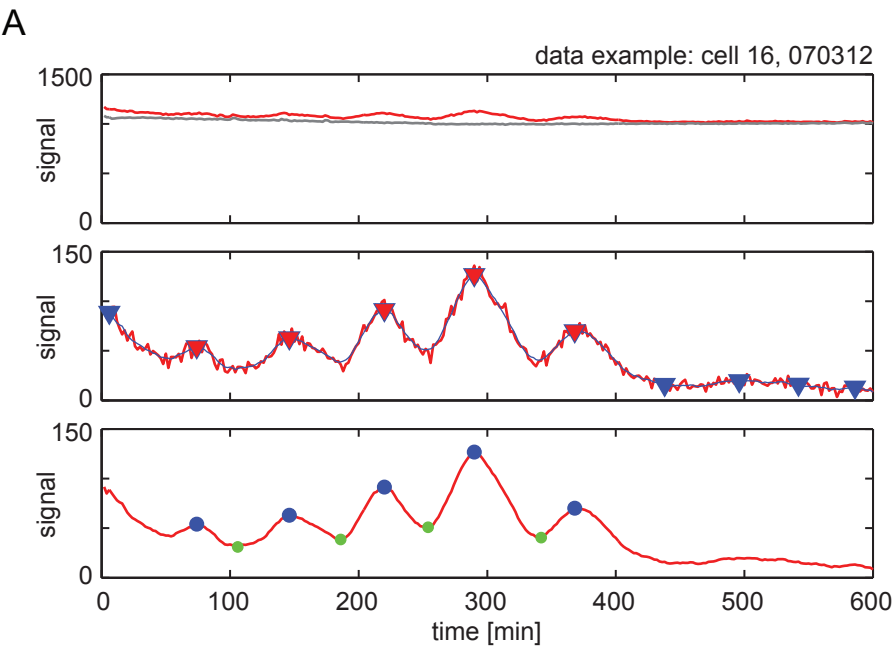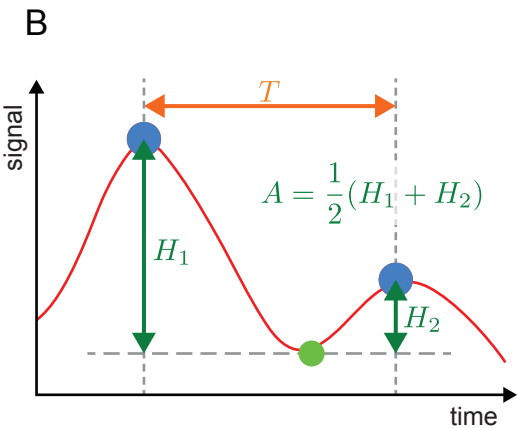

Supplement: supp [file elife_poa_e08438_Figure_1_figure_supplement_2.pdf › elife_poa_e08438_Figure_1_figure_supplement_2.pdf]

A

Brightfield

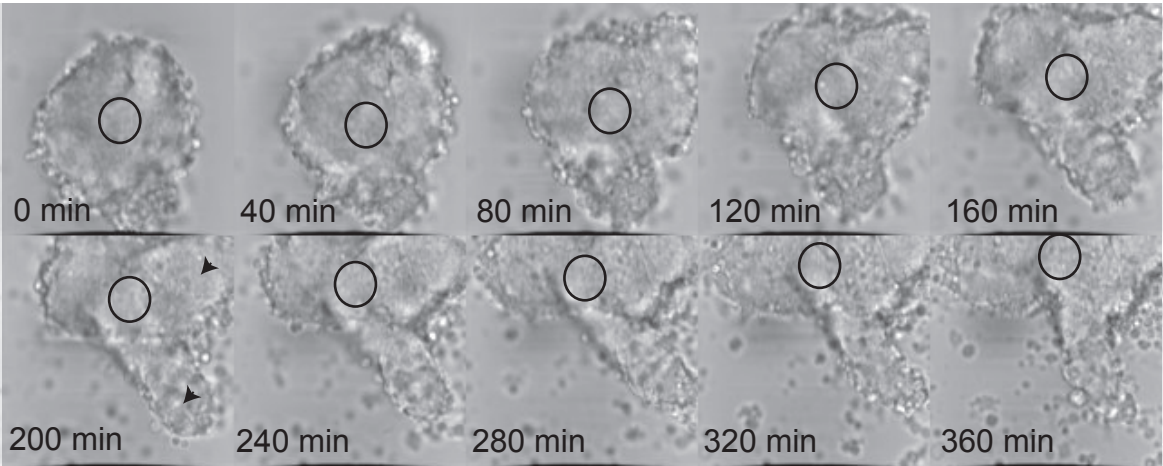

YFP

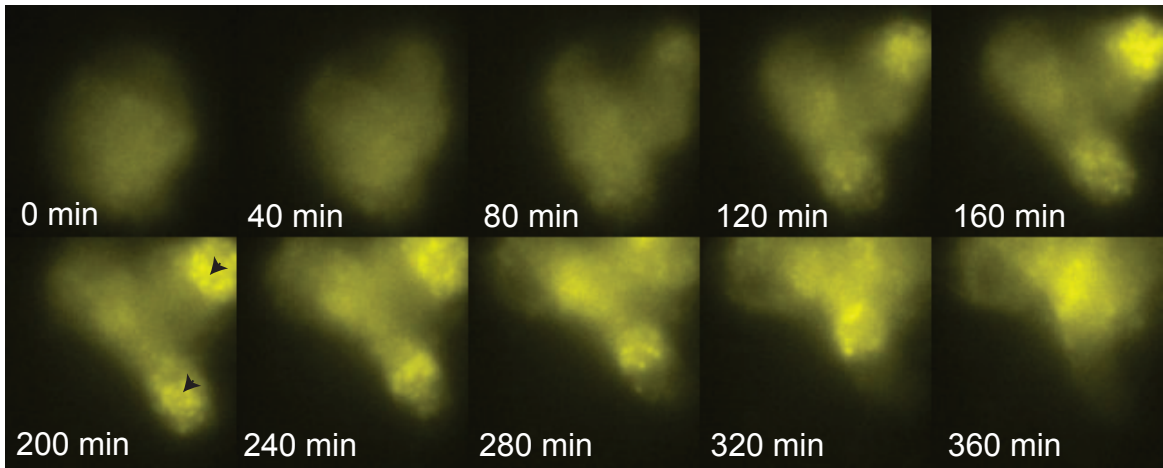

B

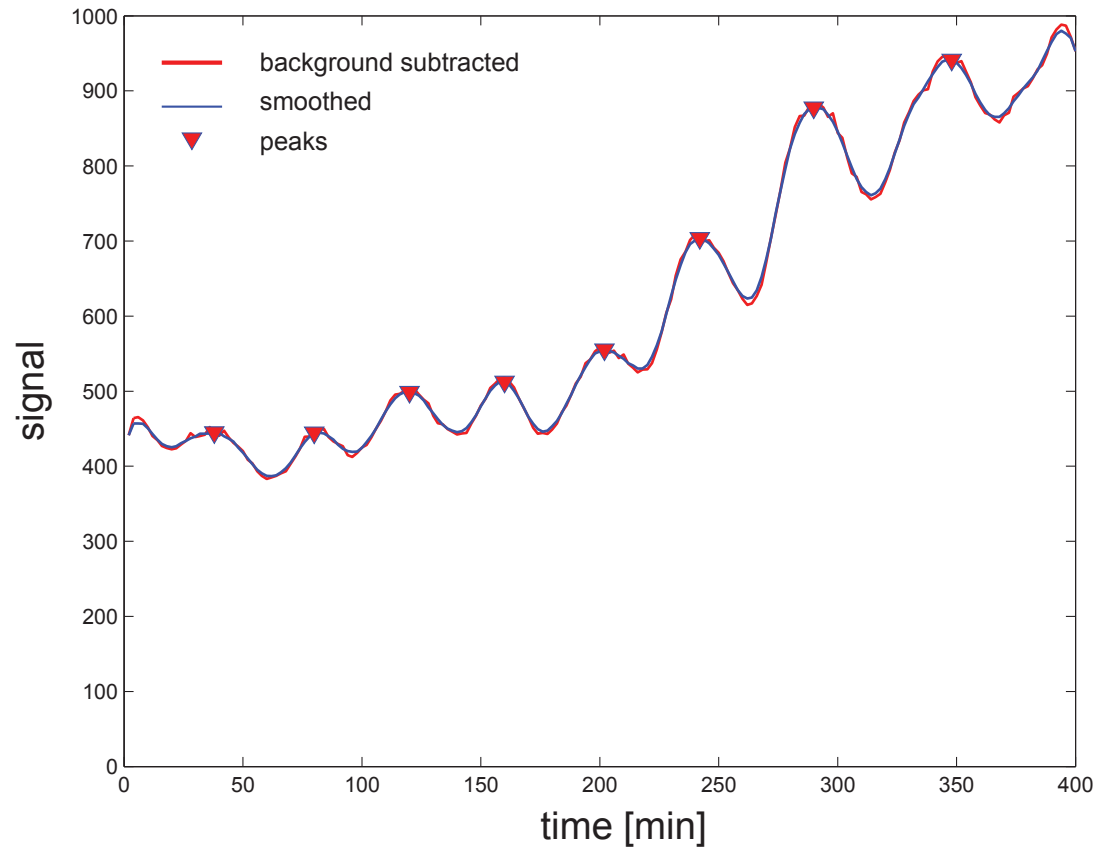

Supplement: supp [file elife_poa_e08438_Figure_1_figure_supplement_3.pdf › elife_poa_e08438_Figure_1_figure_supplement_3.pdf]

A 280711 - serum only

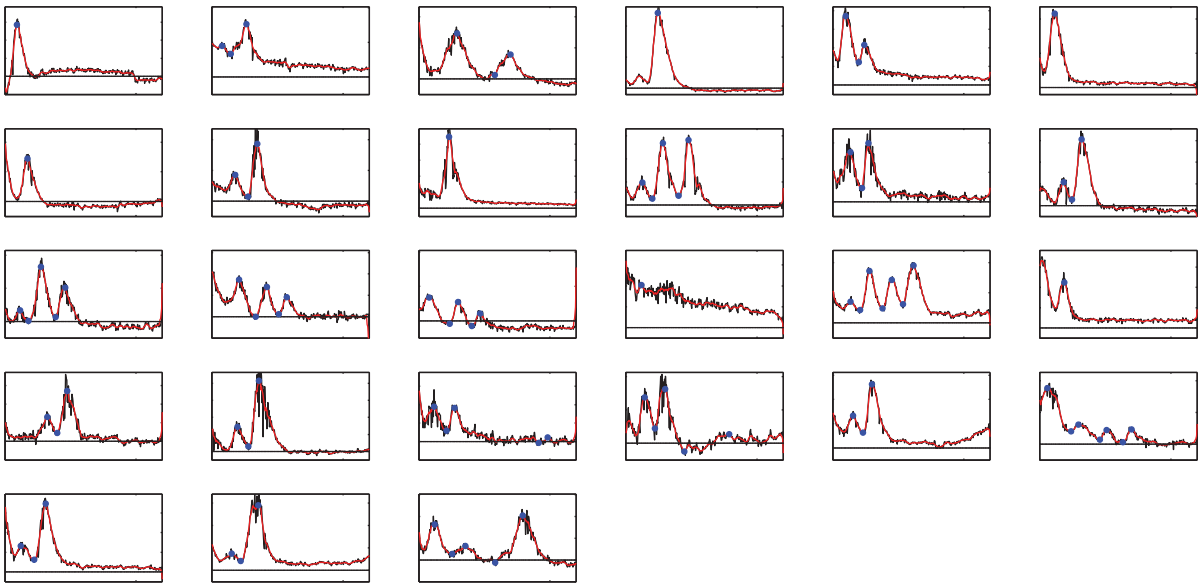

B 250112 - serum only

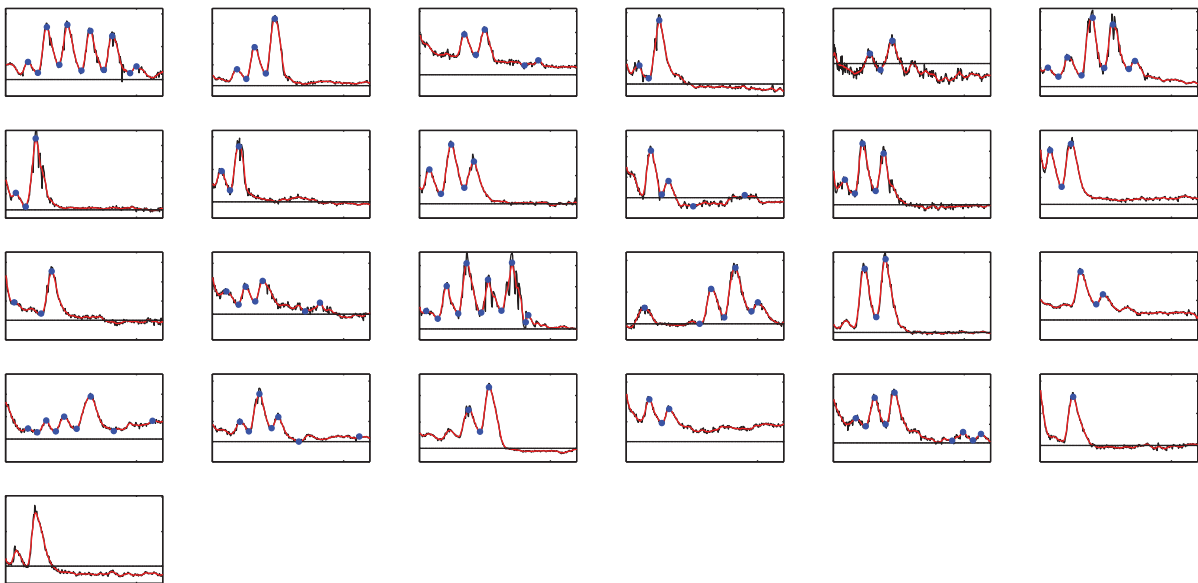

Supplement: supp [file elife_poa_e08438_Figure_1_figure_supplement_4.pdf › elife_poa_e08438_Figure_1_figure_supplement_4.pdf]

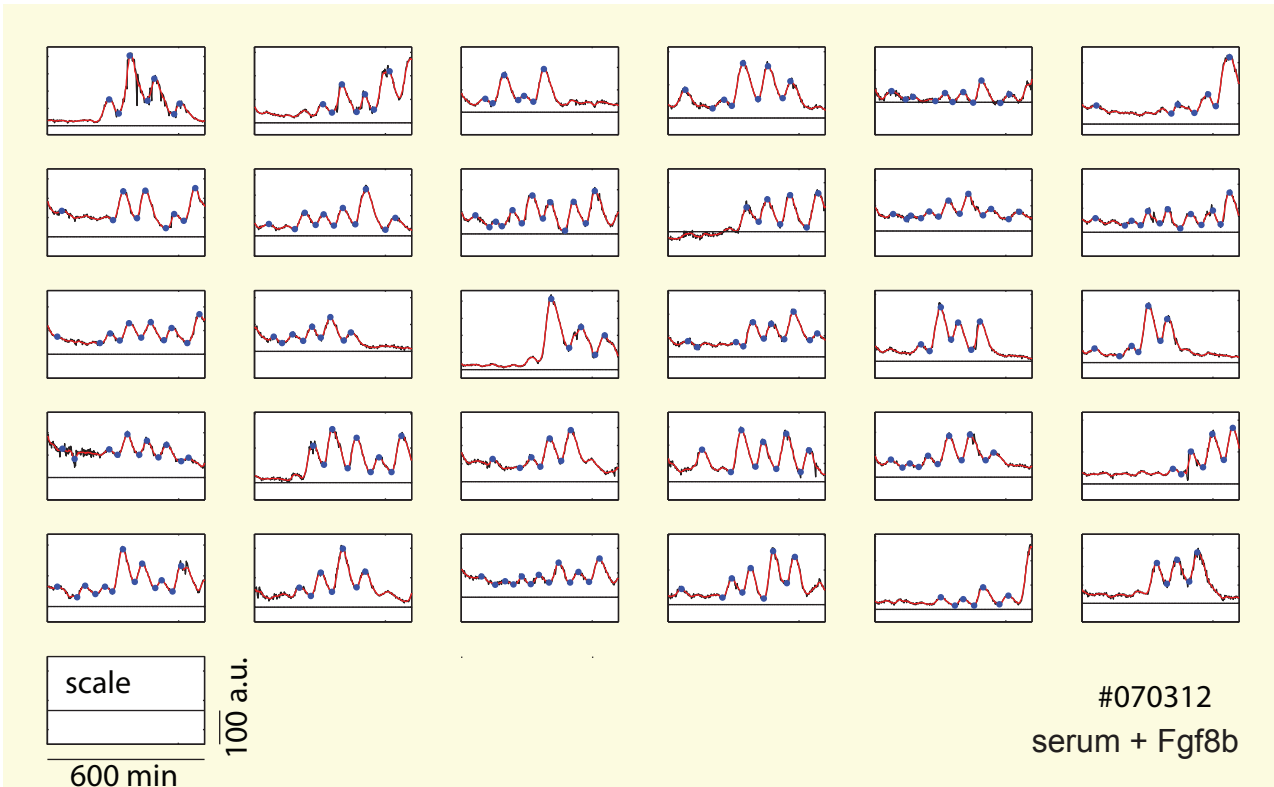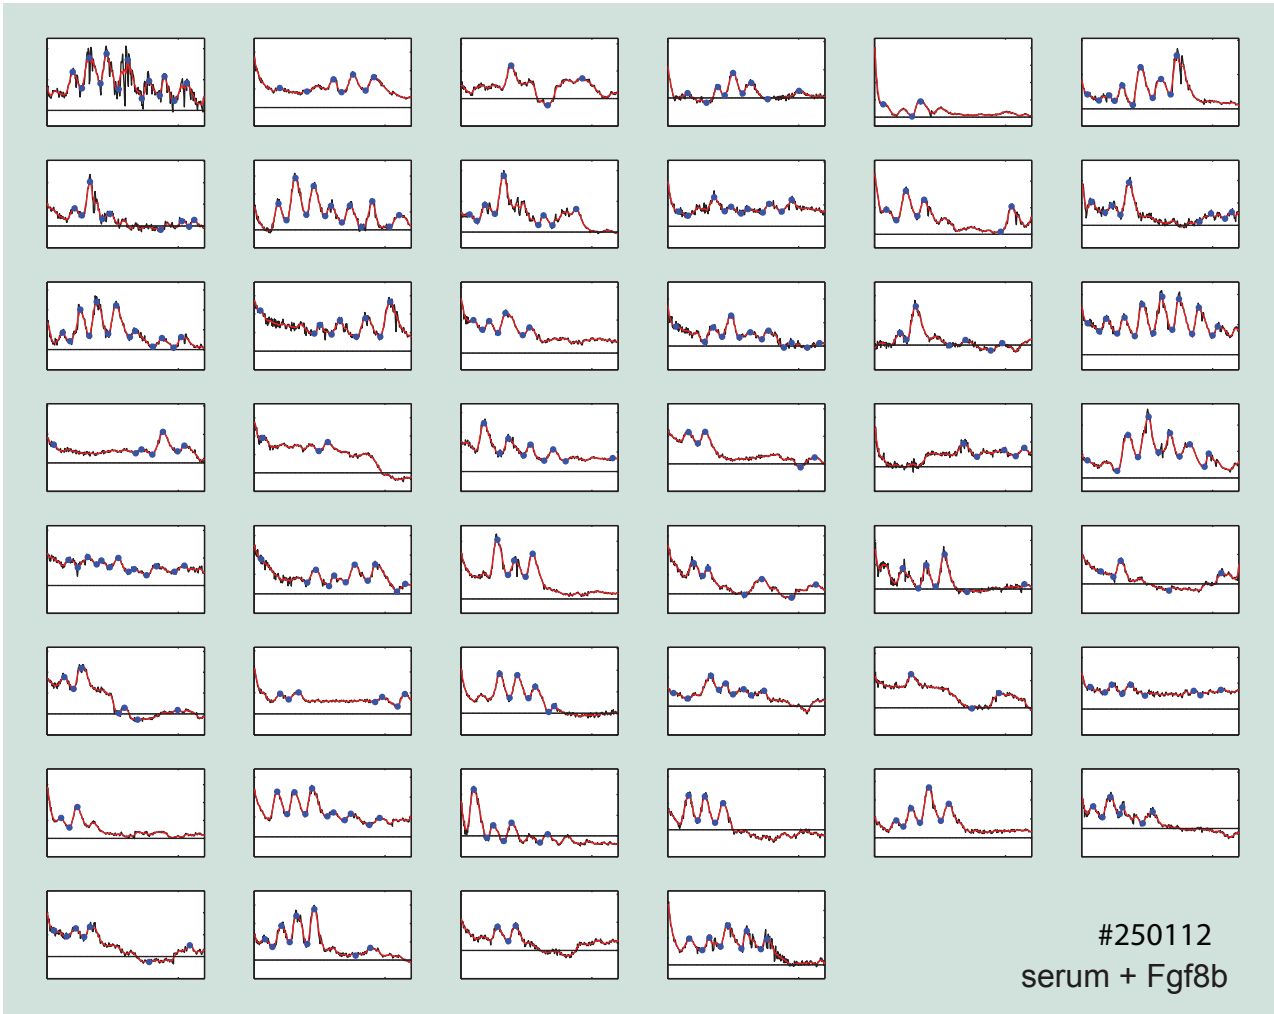

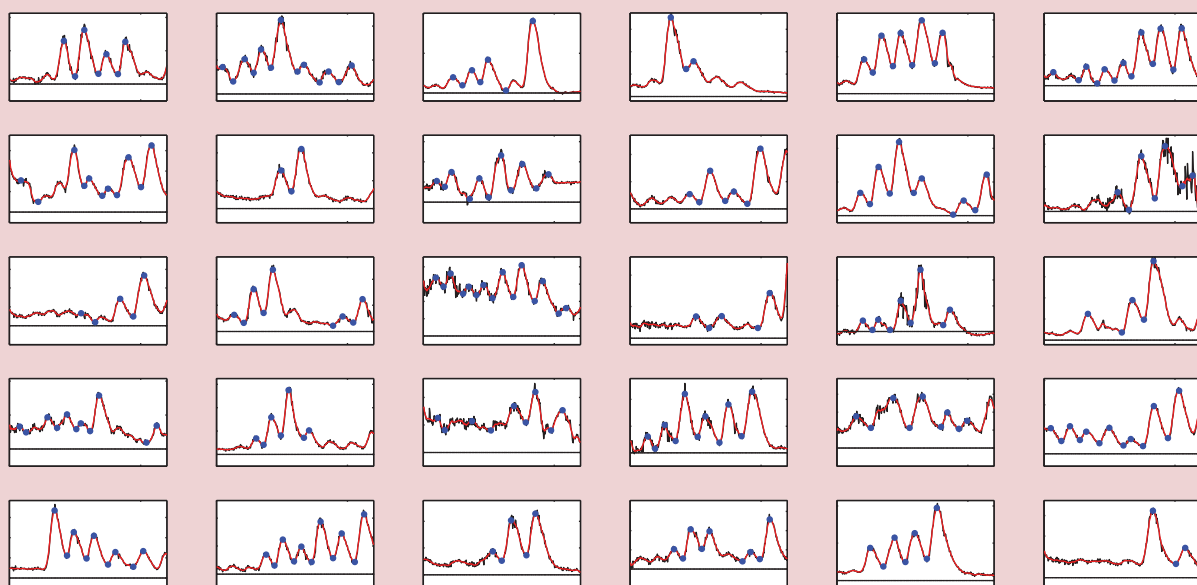

#251012

serum + Fgf8b

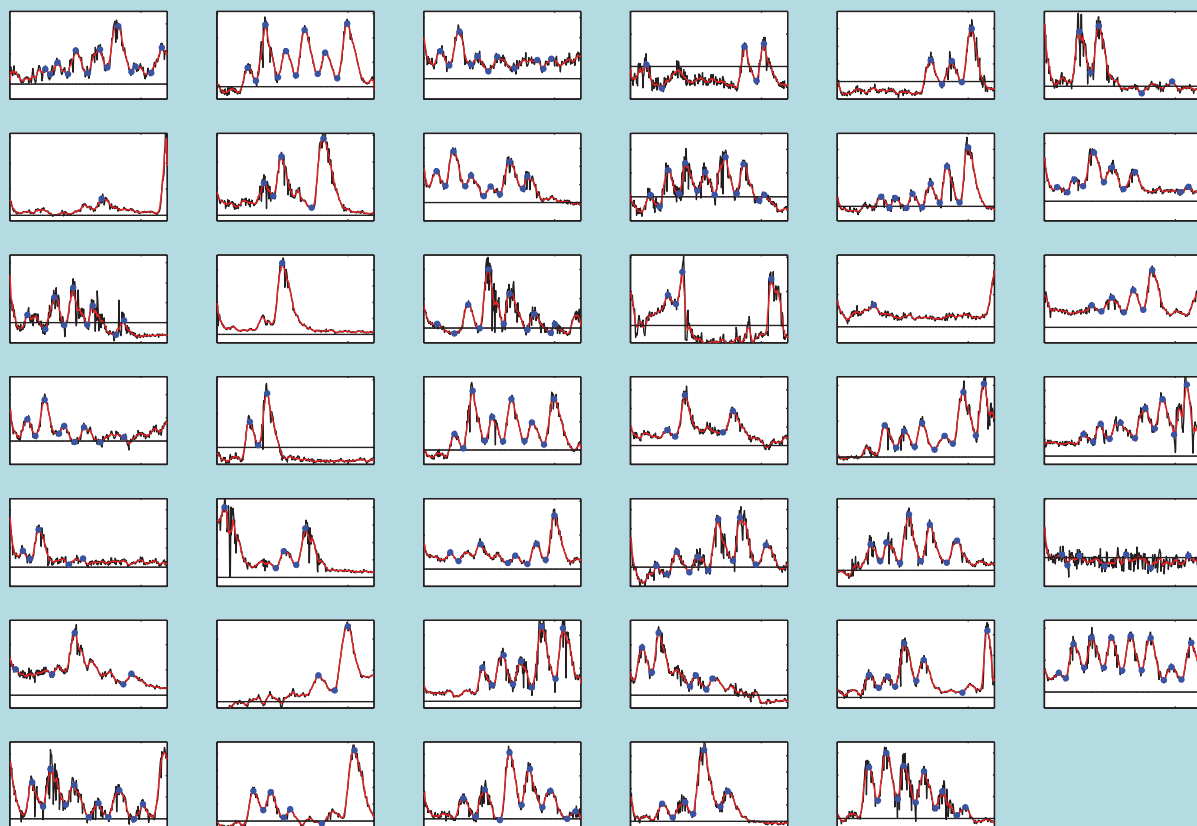

#280711

serum + Fgf8b

Supplement: supp [file elife_poa_e08438_Figure_1_figure_supplement_5.pdf › elife_poa_e08438_Figure_1_figure_supplement_5.pdf]

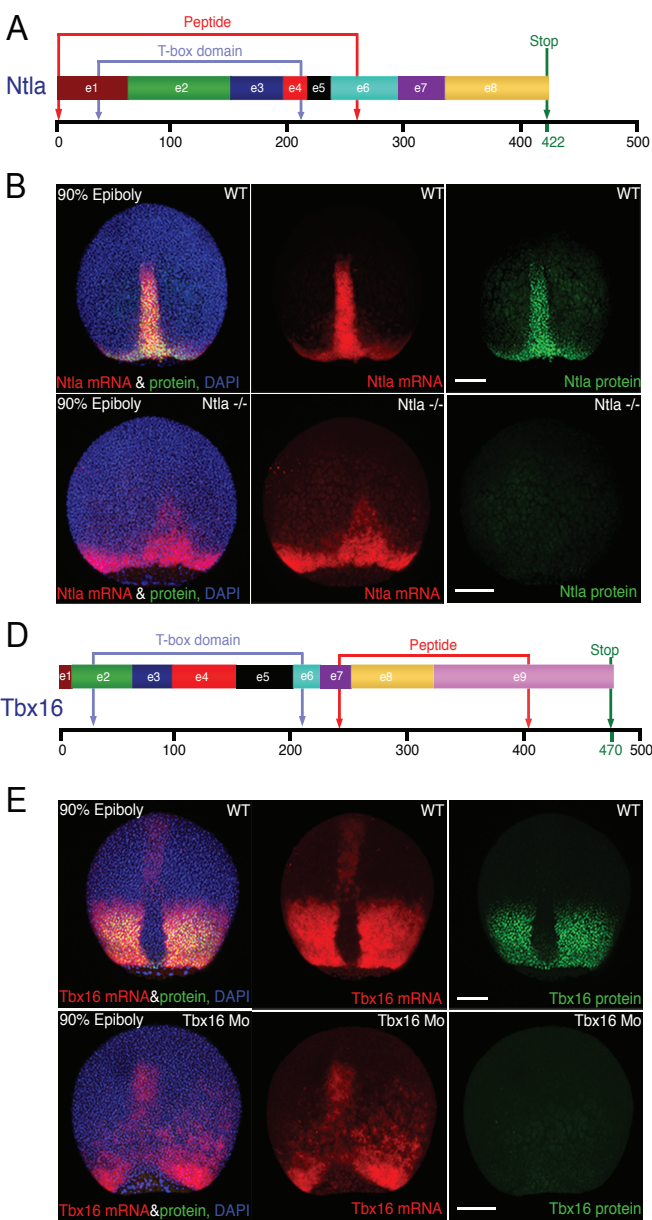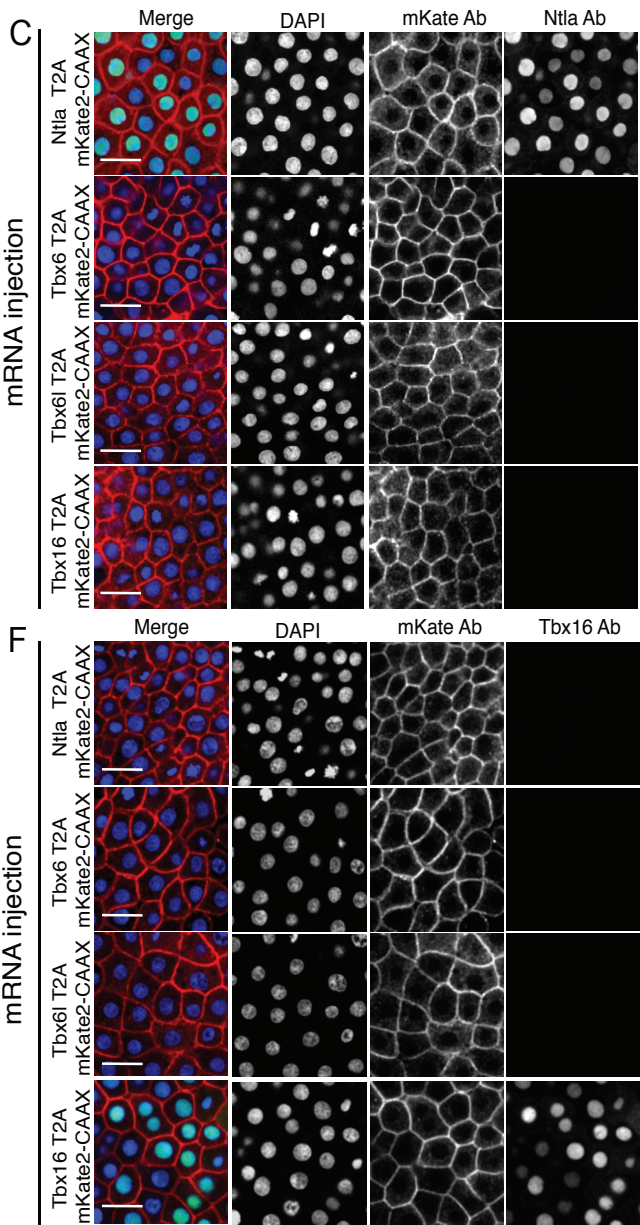

Supplement: supp [file elife_poa_e08438_Figure_1_figure_supplement_6.pdf › elife_poa_e08438_Figure_1_figure_supplement_6.pdf]

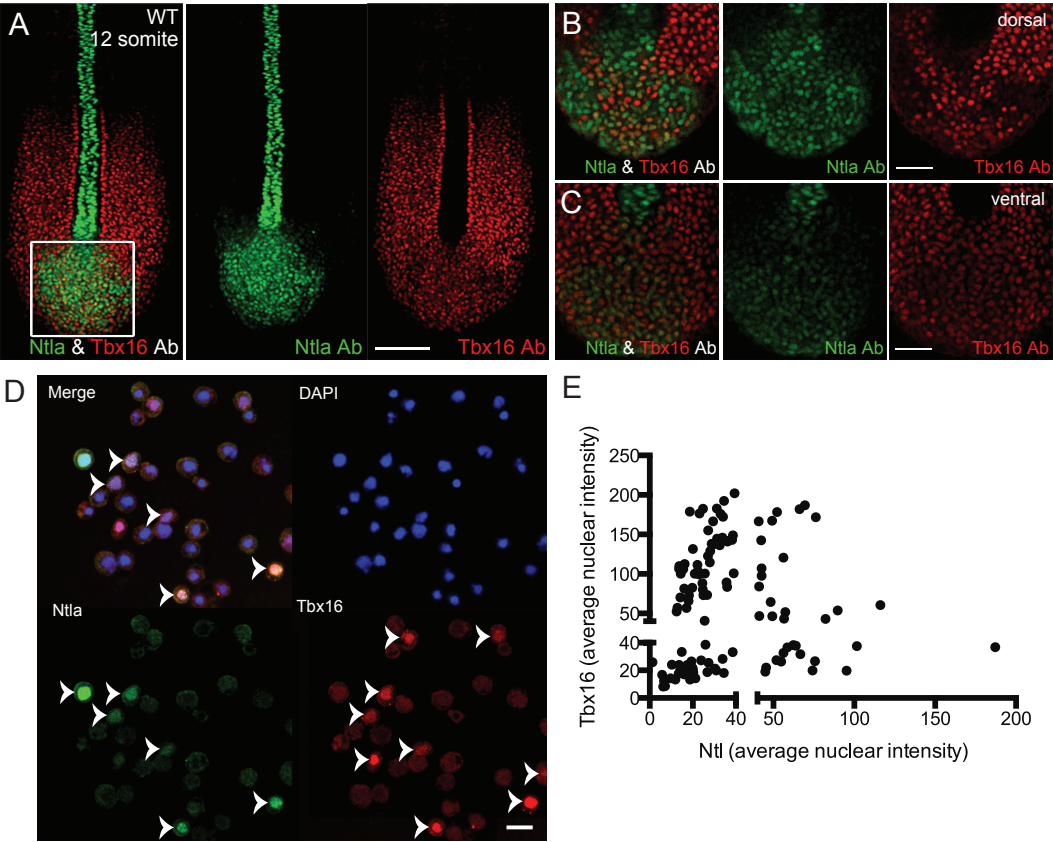

Supplement: supp [file elife_poa_e08438_Figure_1_figure_supplement_7.pdf › elife_poa_e08438_Figure_1_figure_supplement_7.pdf]

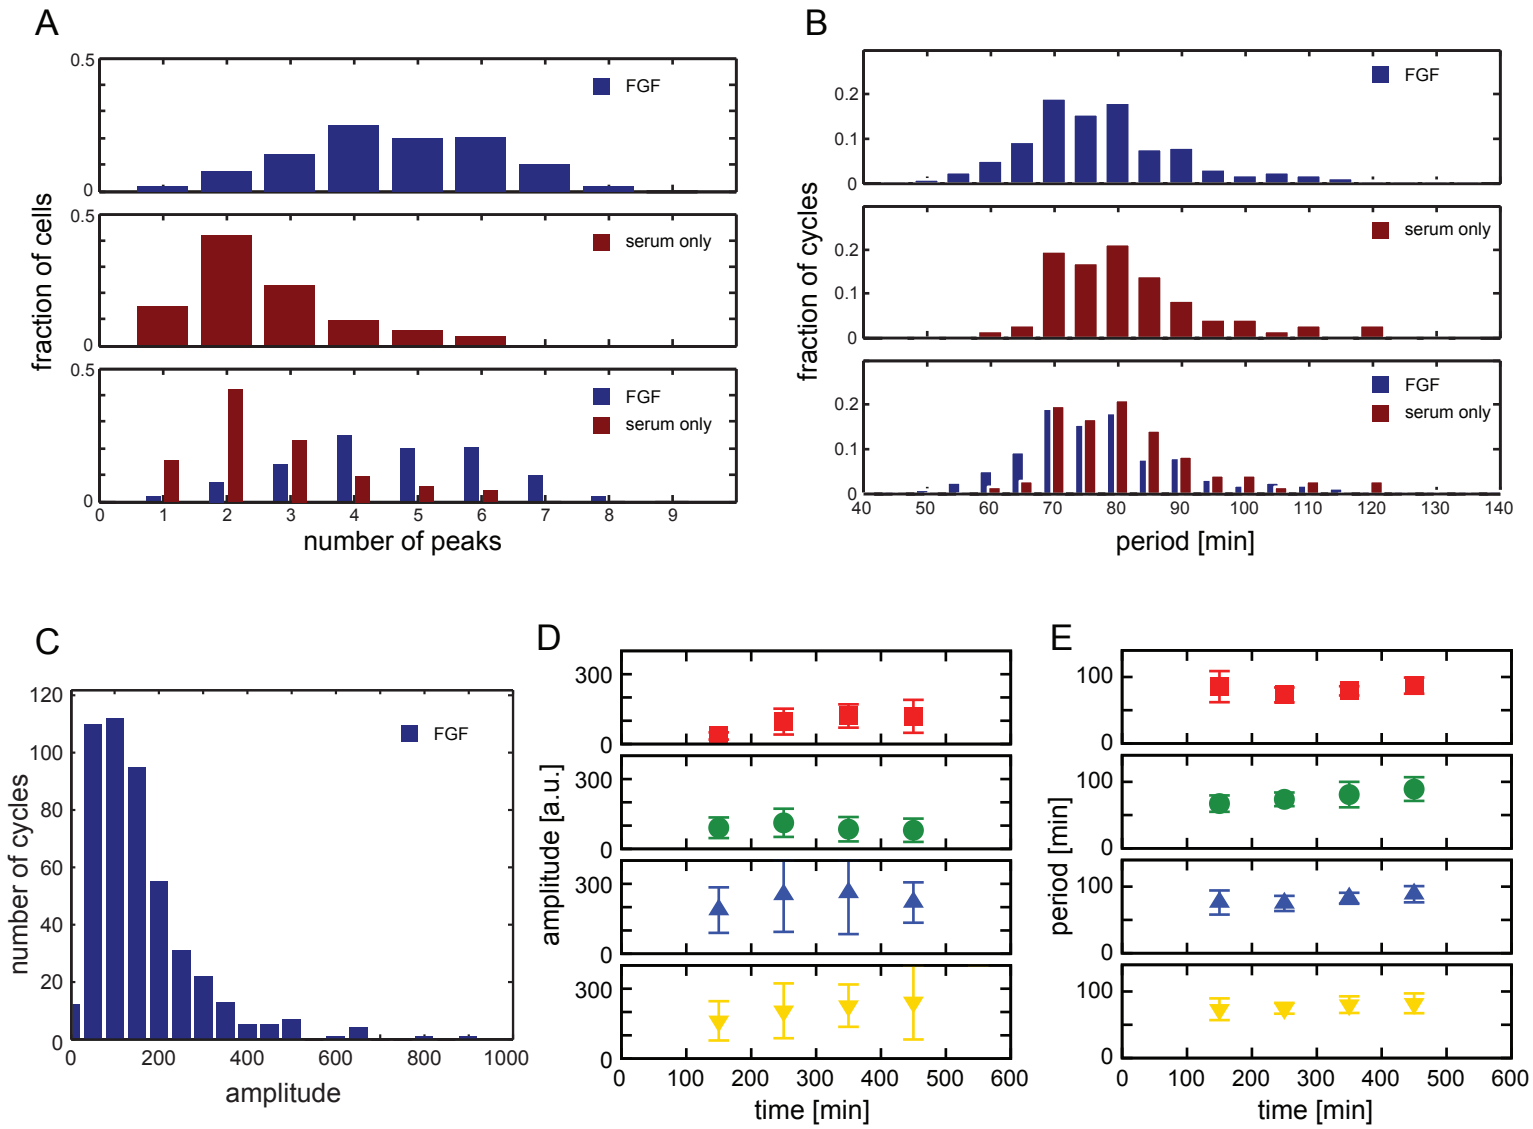

Supplement: supp [file elife_poa_e08438_Figure_1_figure_supplement_8.pdf › elife_poa_e08438_Figure_1_figure_supplement_8.pdf]

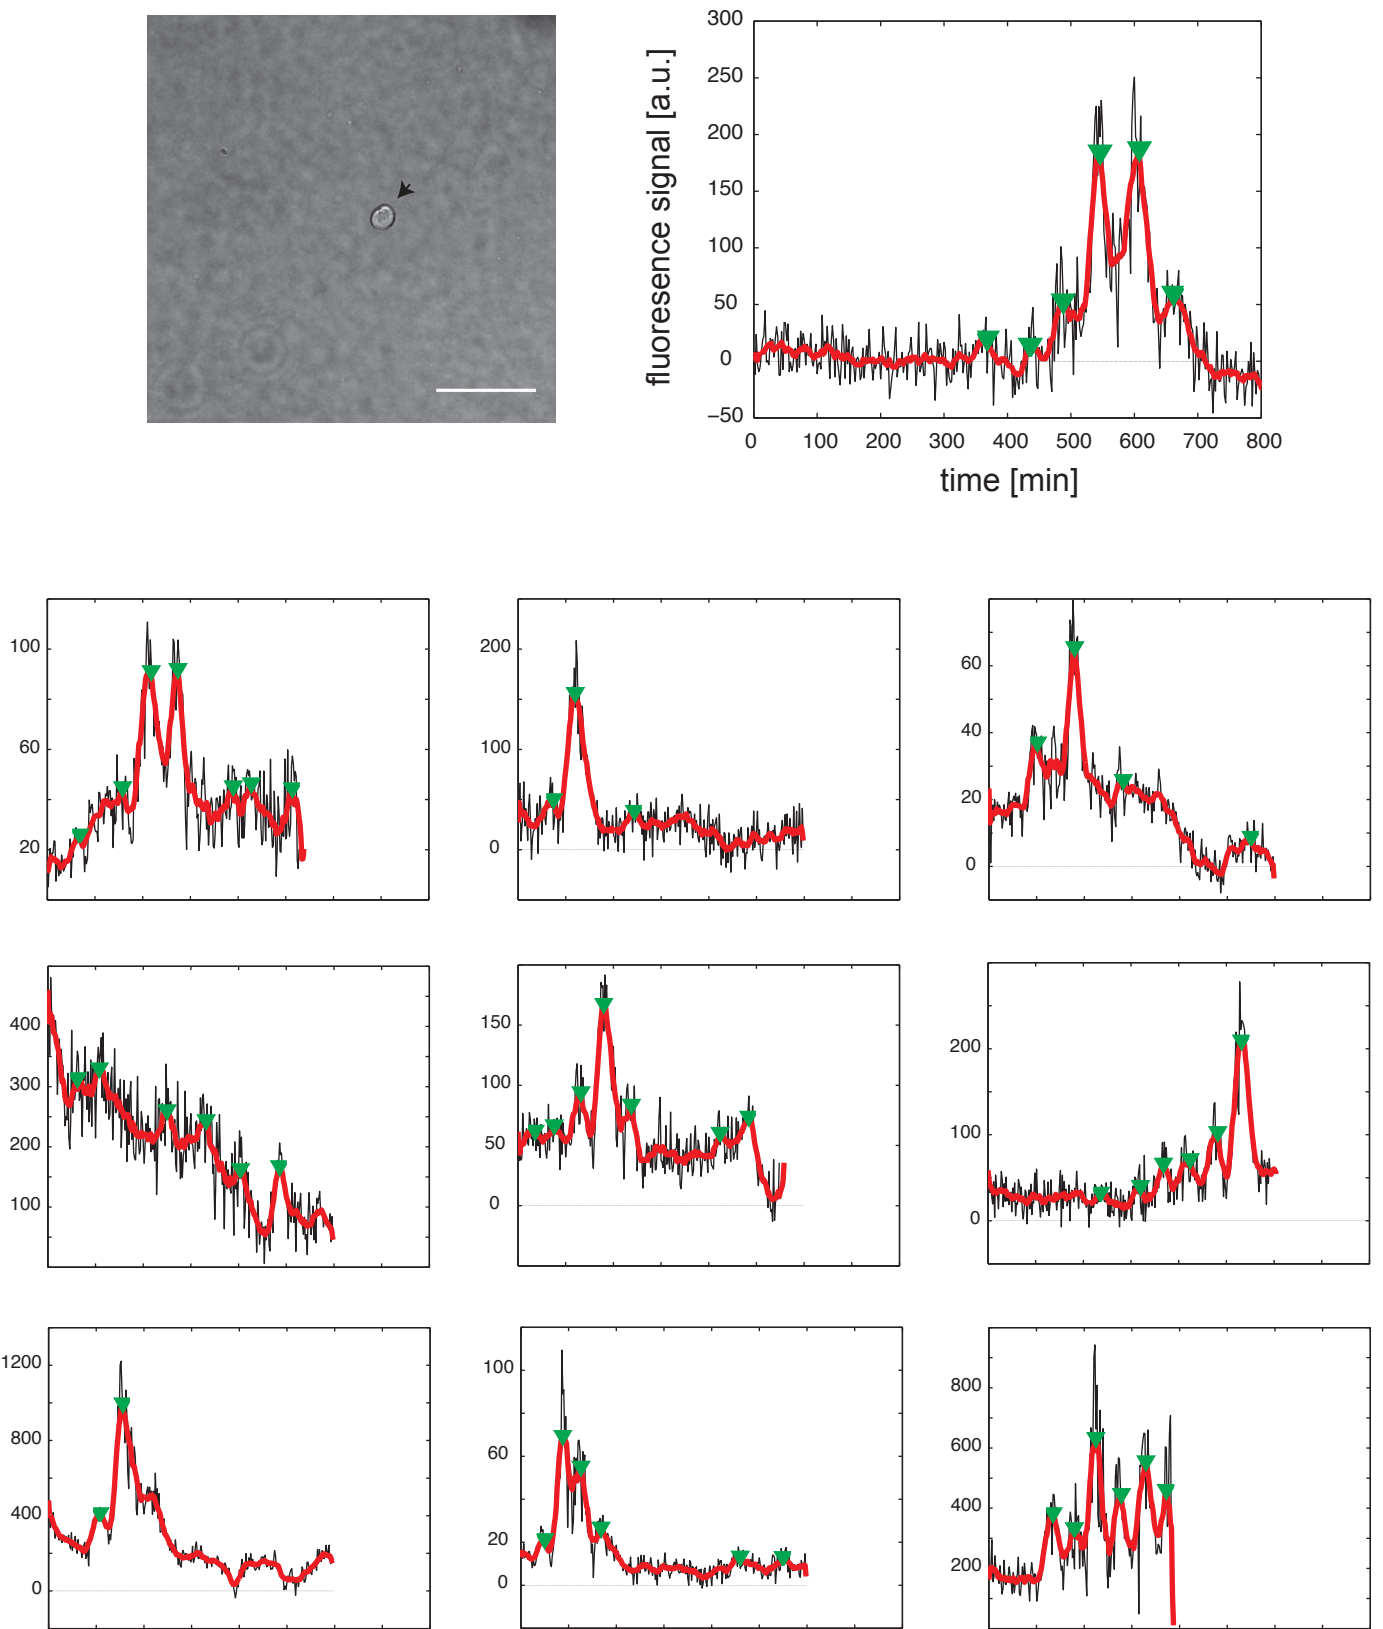

Supplement: supp [file elife_poa_e08438_Figure_1_figure_supplement_9.pdf › elife_poa_e08438_Figure_1_figure_supplement_9.pdf]

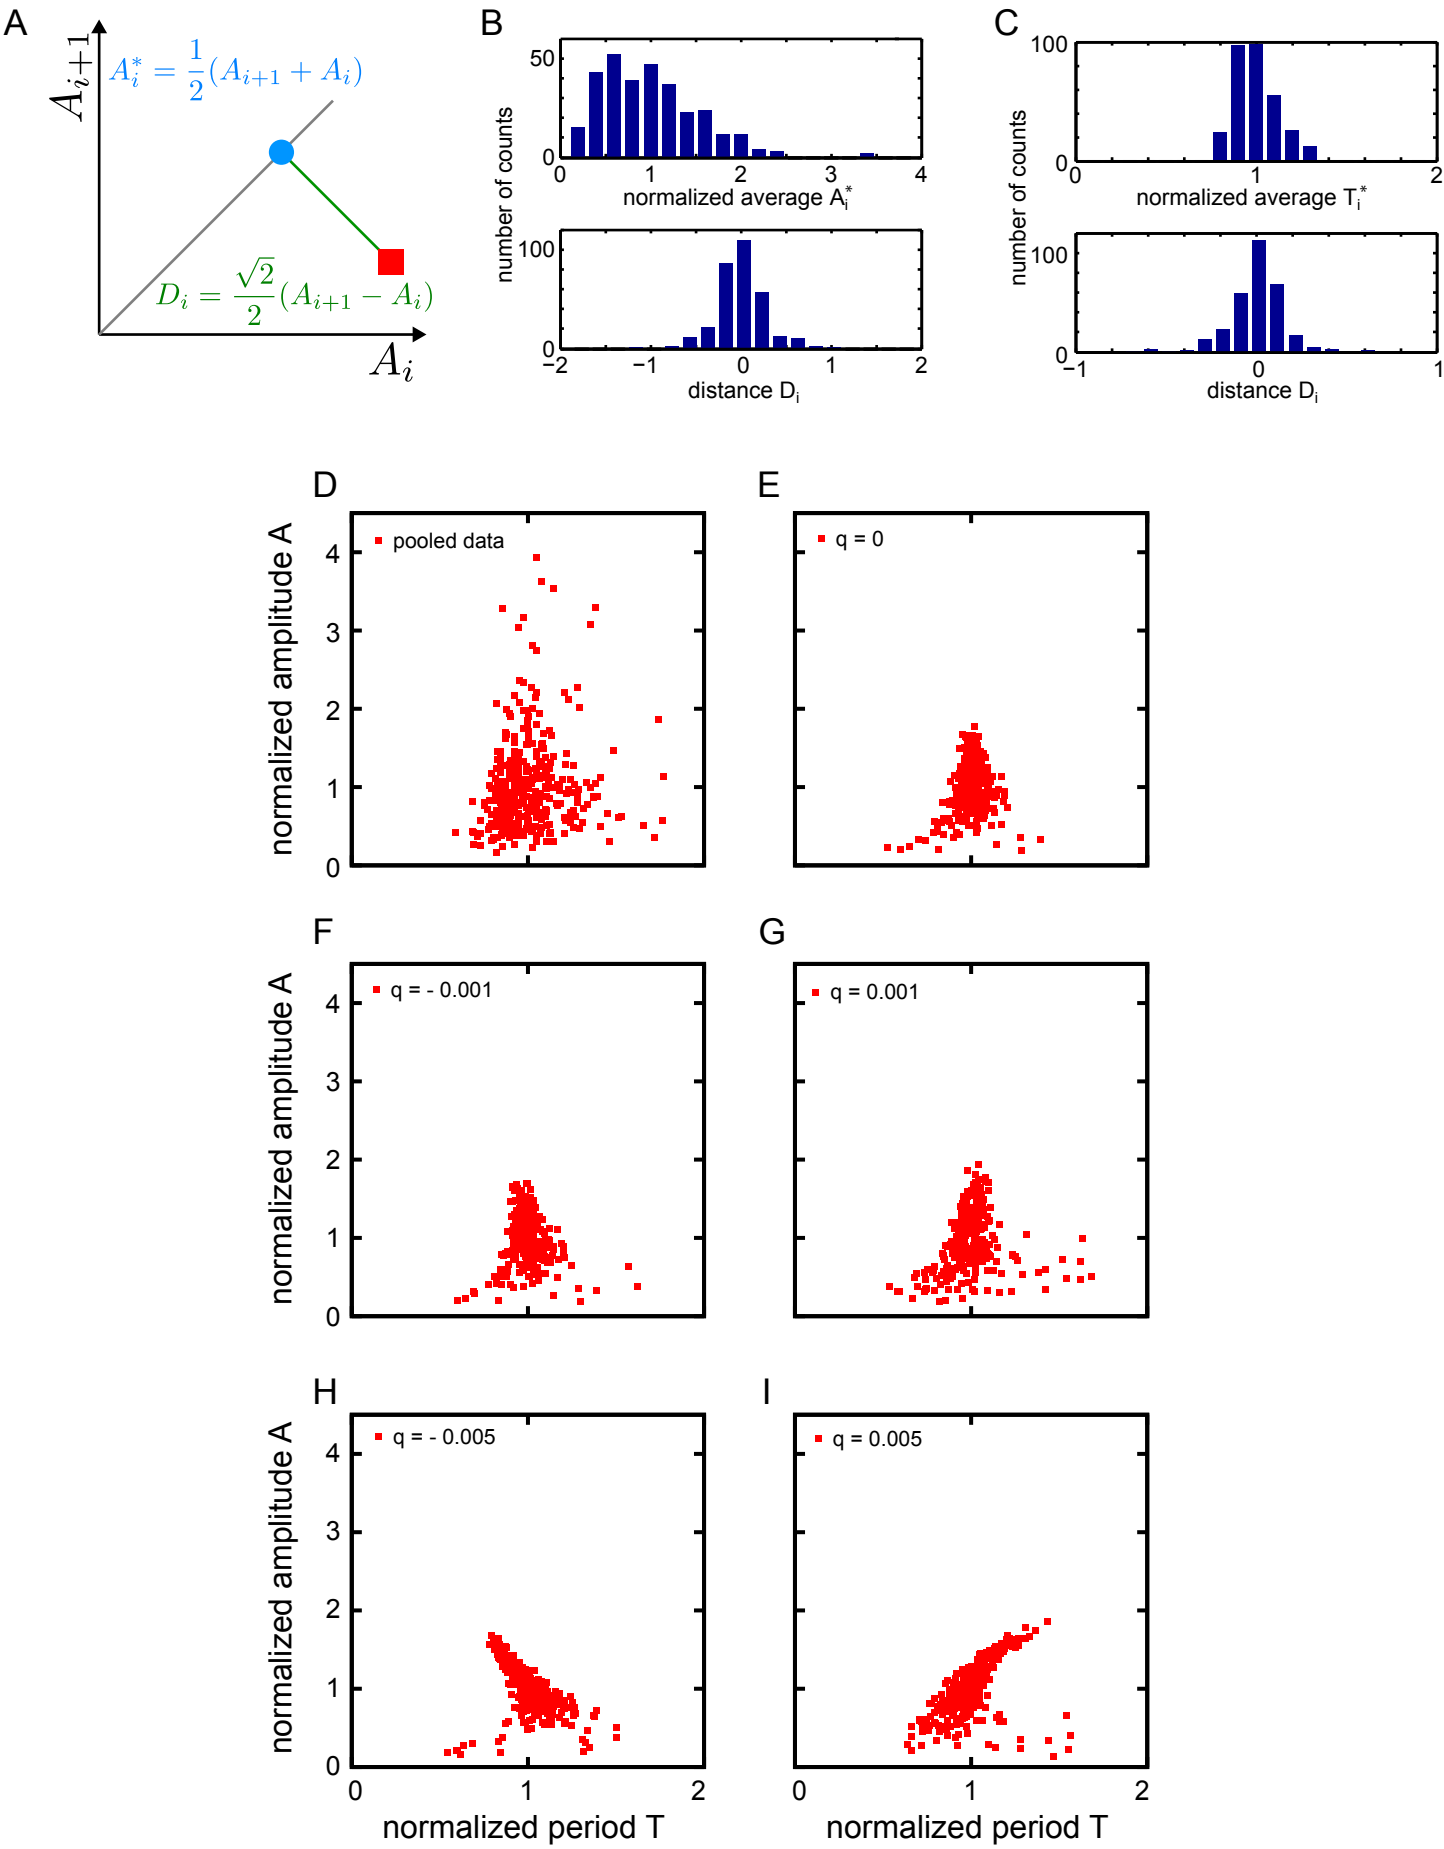

Supplement: supp [file elife_poa_e08438_Figure_2_figure_supplement_1.pdf › elife_poa_e08438_Figure_2_figure_supplement_1.pdf]

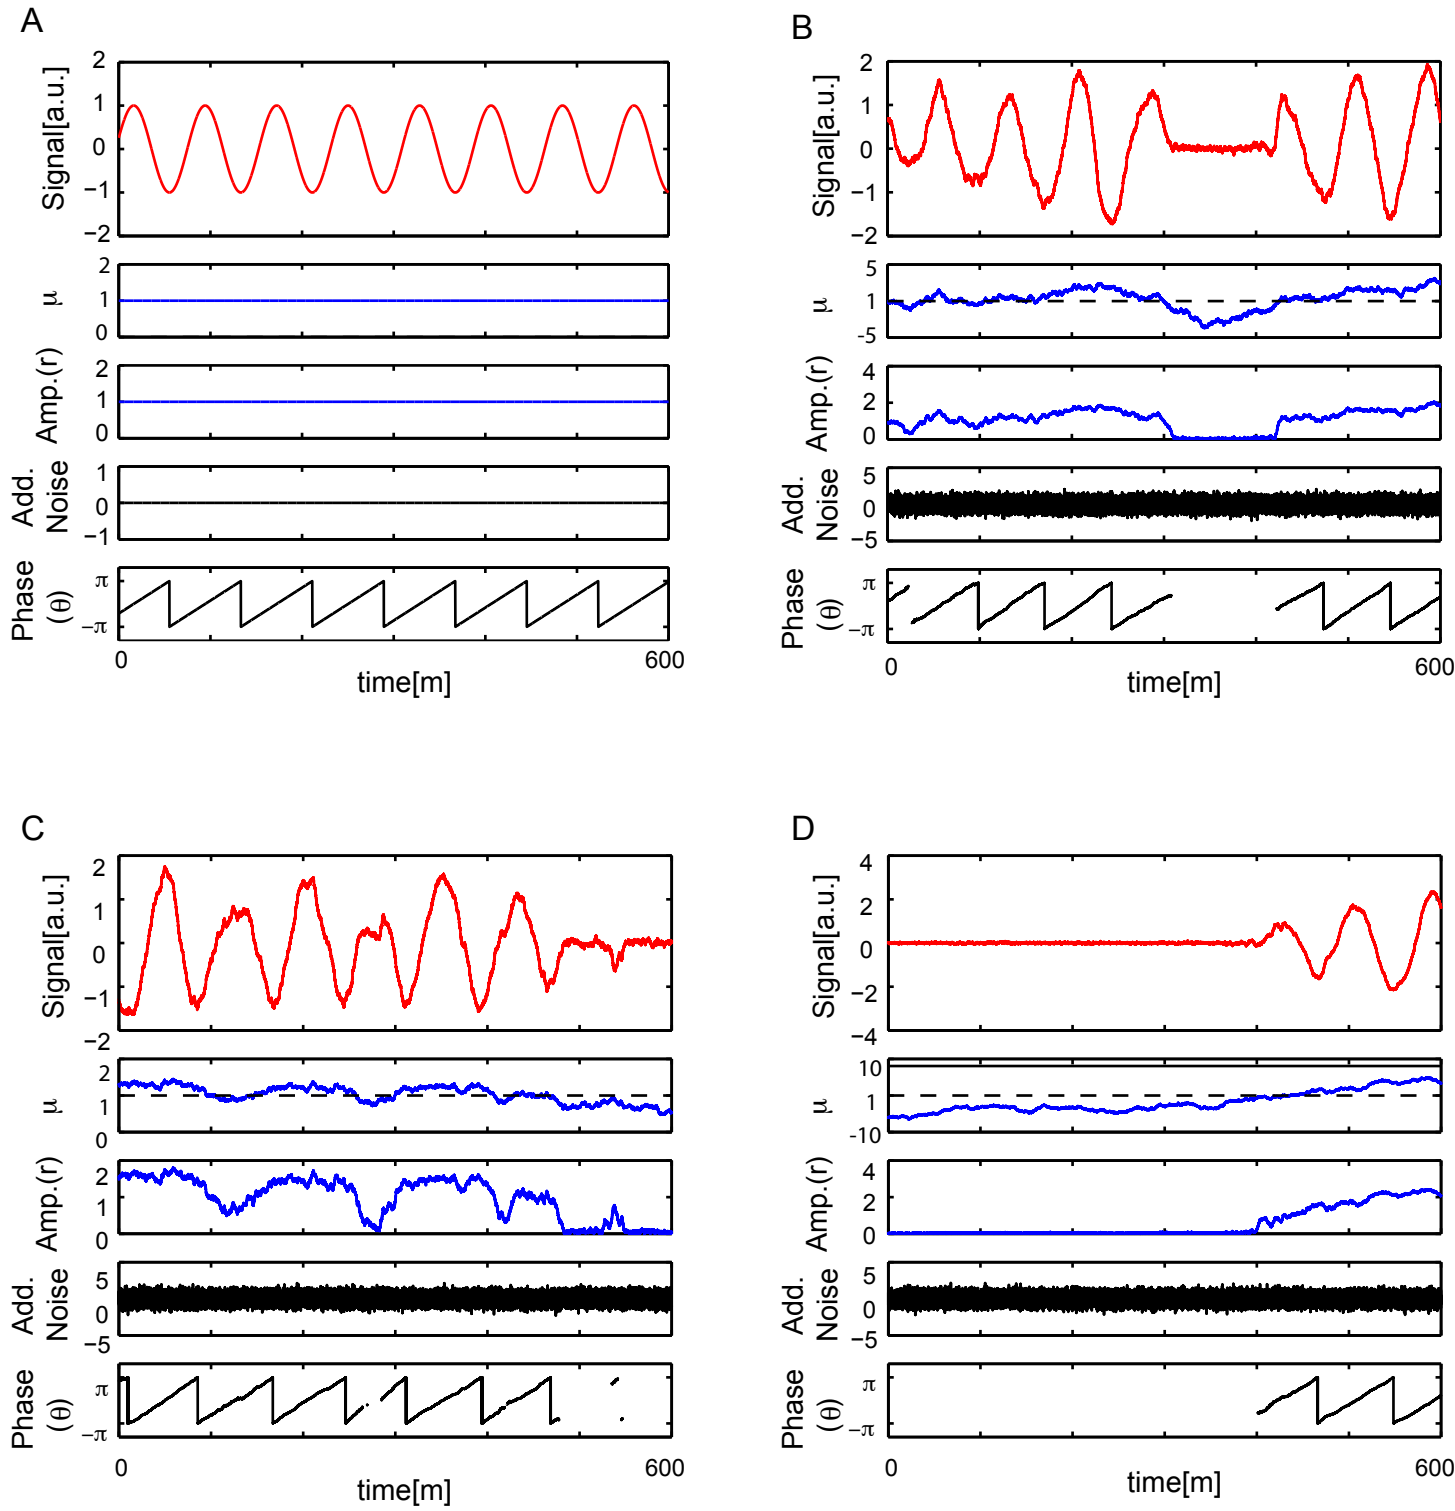

Supplement: supp [file elife_poa_e08438_Figure_2_figure_supplement_2.pdf › elife_poa_e08438_Figure_2_figure_supplement_2.pdf]

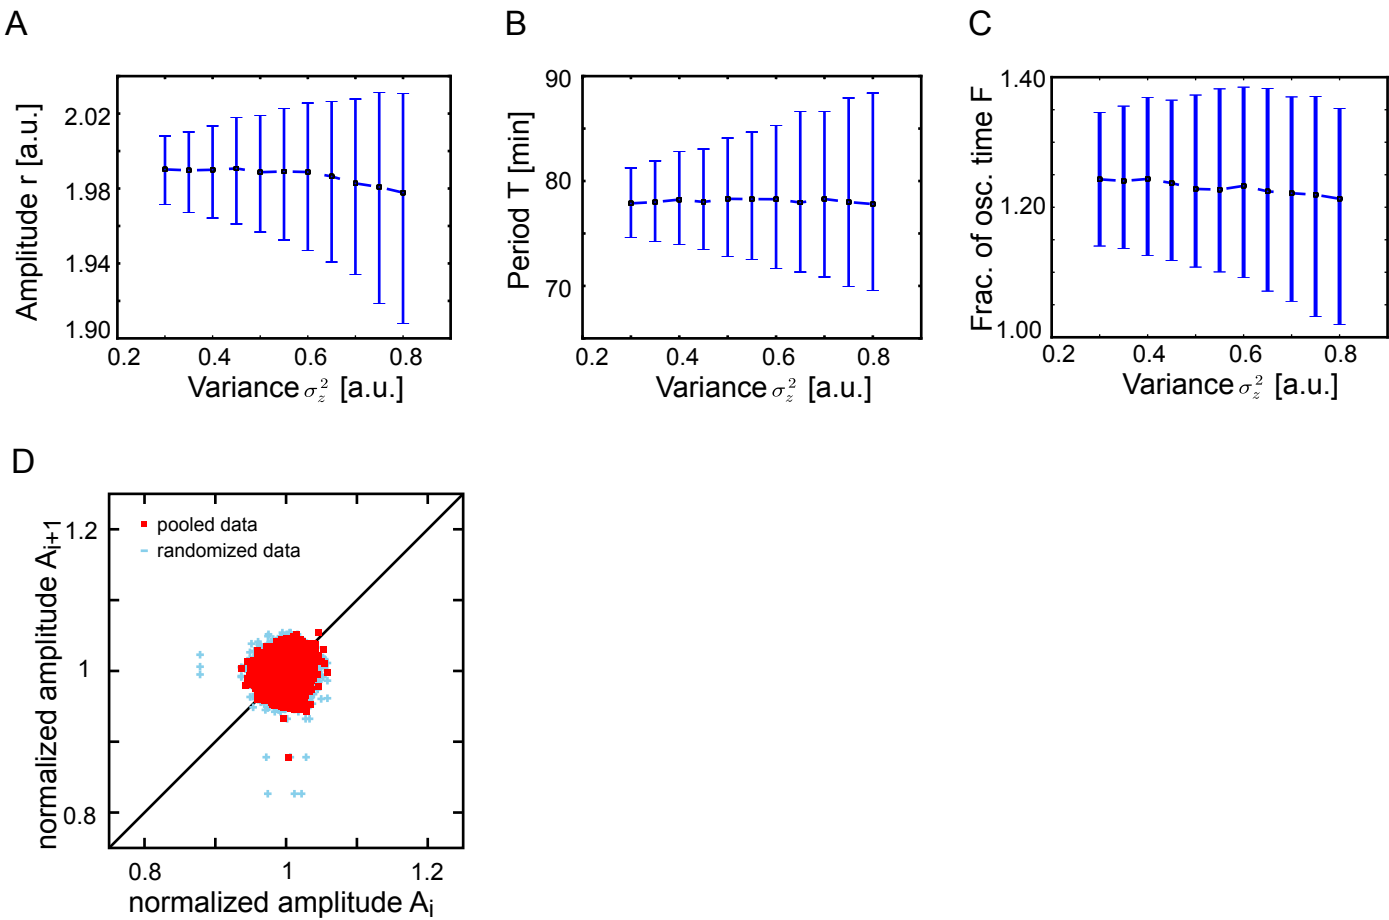

Supplement: supp [file elife_poa_e08438_Figure_2_figure_supplement_3.pdf › elife_poa_e08438_Figure_2_figure_supplement_3.pdf]

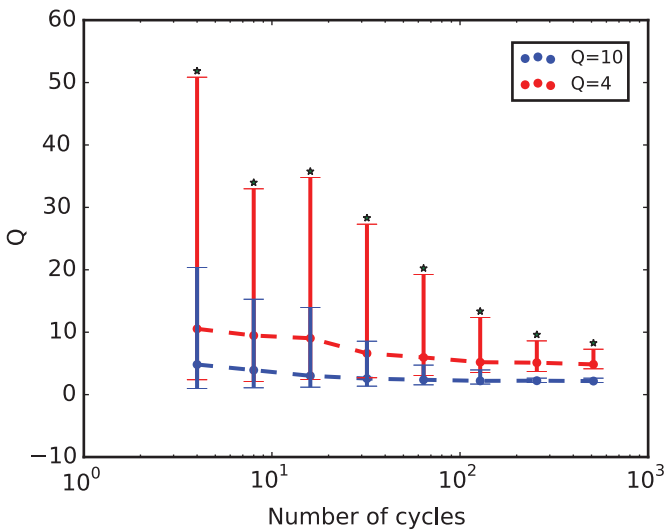

Supplement: supp [file elife_poa_e08438_Figure_3_figure_supplement_1.pdf › elife_poa_e08438_Figure_3_figure_supplement_1.pdf]
